# Supplementary material for: Large-Scale Integration of Meta-QTL and Genome-Wide Association Study Discovers the Genomic Regions and Candidate Genes for Yield and Yield-related Traits in Bread Wheat
Source: Research Square preprint supplement (doi:10.21203/rs.3.rs-342038/v1), 2021-03-26
Supplement: Supplementary file 1 [file 786023bc7a68fa42d72adc44.xlsx]

## Sheet: Table S1
Table S1 Details of previous QTL studies used for Meta-QTL analysis
NO.a	Parents of mapping population	Wheat ploidy	Type of mapping populationb	Size of mapping population	Genetic map informationc	Reference
1	Chinese Spring × Chinese Spring (Kanto107 4A)	bread wheat	RIL	98	Y	Araki et al. 1999
2	NY18 × CC	bread wheat	RIL	78	Y	Campbell et al. 1999
3	CNN(WI3A) × CNN	bread wheat	RIL	50	Y	Shah et al. 1999
4	Chinese Spring (Cappelle-Desprez 5A) × Chinese Spring (Triticum spelta 5A)	bread wheat	RIL	118	Y	Kato et al. 2000
5	Opata 85 × W-7984	bread wheat	RIL	111	Y	Li et al. 2002
6	Opata × Synthetic	bread wheat	RIL	131	N	Ayala et al. 2002
	Frontana × INIA66	bread wheat	RIL	117	Y	Ayala et al. 2002
7	Prinz × W-7984	bread wheat	BC2F2	72	Y	Huang et al. 2003
8	PH132 × WL711	bread wheat	RIL	106	N	Dholakia et al. 2003
9	Courtot × Chinese Spring	bread wheat	DH	187	Y	Sourdille et al. 2003
10	Opata 85 × W7984	bread wheat	RIL	114	Y	Börner et al. 2003
11	Hermon H52 (H52) × Langdon (Ldn)	durum wheat	F2	150	Y	Peng et al. 2003
12	Renan × Récital	bread wheat	RIL	197	Y	Groos et al. 2003
13	Flair × XX86	bread wheat	BC2F1	111	Y	Huang et al. 2004
14	Omrabi 5 × Triticum dicoccoides 600545	durum wheat	RIL	114	Y	Elouafi and Nachit, 2004
15	Opata 85 × W-7984	bread wheat	RIL	110	Y	Jantasuriyarat et al. 2004
16	RL4452 × AC Domain	bread wheat	DH	182	Y	McCartney et al. 2005
17	Chinese Spring × SQ1	bread wheat	DH	96	Y	Quarrie et al. 2005
18	Fukuhokomugi × Oligoculm	bread wheat	DH	107	Y	Suenage et al. 2005
19	Milan × Catbird	bread wheat	DH	96	Y	Verma et al. 2005
20	Ning7840 × Clark	bread wheat	RIL	132	Y	Marza et al. 2006
21	Karl 92 × TA 4152-4	bread wheat	BC2F2:4	190	Y	Narasimhamoorthy et al. 2006
22	Am3 × Laizhou953	bread wheat	BC4F3 IL	97	Y	Liu et al. 2006
23	AC Karma × 87E03-S2B1	bread wheat	DH	185	Y	Huang et al. 2006
24	Lovrin 10 × Chinese Spring	bread wheat	DH	150	Y	Su et al. 2006
25	Cheyenne (CNN) × WI [CNN(WI3A)]	bread wheat	RIL	95	Y	Dilbirligi et al. 2006
26	Latino × MG29896	durum wheat	BC3F5	92	Y	Blanco et al. 2006
27	Dharwar Dry × Sitta	bread wheat	RIL	127	Y	Kirigwi et al. 2007
28	WL711 × PH132	bread wheat	RIL	100	N	Kumar et al. 2007
	Opata85 × W7984	bread wheat	RIL	110	N	Kumar et al. 2007
29	Chuang 35050 × Shannong 483	bread wheat	RIL	131	Y	Li et al. 2007
30	W7984 × Opata 85	bread wheat	RIL	115	N	Breseghello and Sorrells, 2007
	AC Reed × Grandin	bread wheat	DH	101	N	Breseghello and Sorrells, 2007
31	Trident × Molineux	bread wheat	DH	182	N	Kuchel et al. 2007
32	Nanda2419 × Wangshuibai	bread wheat	RIL	136	Y	Ma et al. 2007
33	Chinese Spring × SQ1	bread wheat	DH	95	Y	Habash et al. 2007
34	Hanxuan 10 × Lumai 14	bread wheat	DH	150	Y	Yang et al. 2007
35	Arche × Récital	bread wheat	DH	241	Y	Laperche et al. 2007
36	Superb × BW278	bread wheat	DH	402	Y	Cuthbert et al. 2008
37	Kofa × Svevo	durum wheat	RIL	249	Y	Maccaferri et al. 2008
38	Seri M82 × Babax	bread wheat	RIL	192	N	Mathews et al. 2008
39	CA9613 × H1488	bread wheat	DH	108	Y	Hai et al. 2008
40	TA4152-60 × ND495	bread wheat	DH	120	Y	Chu et al. 2008
41	UC1113 × Kofa	bread wheat	RIL	93	N	Zhang et al. 2008
42	Superb × BW278	bread wheat	DH	402	Y	Cuthbert et al. 2008
43	Opata-85 × W7984	bread wheat	RIL	63	N	Pshenichnikova et al. 2008
44	Am3 × Laizhou 953	bread wheat	BC5F2	85	Y	Liao et al. 2008
45	Heshangmai × Yu8679	bread wheat	RIL	142	Y	Wang et al. 2009
46	Hanxuan 10 × Lumai 14	bread wheat	DH	120	Y	Su et al. 2009
47	Chuan 35050 × Shannong 483	bread wheat	RIL	131	Y	Sun et al. 2009
48	PH82-2 × Neixiang 188	bread wheat	RIL	240	Y	Zhang et al. 2009
49	Chara × WW2449	bread wheat	DH	190	Y	Raman et al. 2009
50	Oste-Gata × Massara-1	durum wheat	F2	151	N	Golabadi et al. 2010
51	Seri M82 × Babax	bread wheat	RIL	192	N	McIntyre et al. 2010
52	Seri × Babax	bread wheat	RIL	167	N	Pinto et al. 2010
53	Rye Selection 111 × Chinese Spring	bread wheat	RIL	185	Y	Ramya et al. 2010
54	MN98550 (‘Bacup’/‘McVey’) × MN99394 (SD3236/SBF0402)	bread wheat	RIL	139	Y	Tsilo et al. 2010
55	Ning7840 × Clark cross	bread wheat	RIL	132	Y	Sun et al. 2010
56	Huapei 3 × Yumai 57	bread wheat	DH	168	Y	Li et al. 2010
57	Fukuho-kumogi × Oligoculm	bread wheat	DH	107	N	Heidari et al. 2011
58	Line3228 × Jing 4839	bread wheat	RIL	237	Y	Wang et al. 2011
59	Laizhou953 × 05210	bread wheat	F2	166	Y	Deng et al. 2011
60	Reeder (PI 613586) × Conan (PI 607549)	bread wheat	RIL	91	N	Naruoka et al. 2011
	McNeal (PI 574642) × Thatcher (CI 10003)	bread wheat	RIL	160	N	Naruoka et al. 2011
	McNeal × Reeder	bread wheat	RIL	50	N	Naruoka et al. 2011
61	Chinese Spring (CS) × SQ1	bread wheat	DH	94	N	Czyczyo-Mysza et al. 2011
62	durum wheat cultivar (Langdon; LDN hereafter) × wild emmer accession (G18-16)	durum wheat	RIL	152	Y	Peleg et al. 2011
63	Weimai 8 × Jimai 20	bread wheat	RIL	485	N	Cui et al. 2011
64	Hanxuan 10 × Lumai 14	bread wheat	DH	150	Y	Wu et al. 2011
65	CS × KT19-1 (Sp)	bread wheat	RIL	147	Y	Manickavelu et al. 2011
66	Chuanmai 42 × Chuannong 16	bread wheat	RIL	127	Y	Tang et al. 2011
67	CNN × CNN (WI 3A)	bread wheat	RIL	223	Y	Ali et al. 2011
68	PDW 233 × Bhalegaon 4	durum wheat	RIL	140	Y	Patil et al. 2012
69	RAC875 × Kukri	bread wheat	DH	368	Y	Bennett et al. 2012a
70	RAC875 × Kukri	bread wheat	DH	368	Y	Bennett et al. 2012b
71	Hanxuan 10 × Lumai 14	bread wheat	DH	150	Y	Wu et al. 2012
72	Svevo × Ciccio	durum wheat	RIL	120	Y	Blanco et al. 2012
73	Hanxuan 10 × Lumai 14	bread wheat	DH	150	N	Li et al. 2012b
74	Rye Selection111 × Chinese Spring	bread wheat	RIL	92	Y	Mir et al. 2012
75	Louise × Penawawa	bread wheat	RIL	188	Y	Carter et al. 2012
76	BR34 × Grandin	bread wheat	RIL	118	Y	Simons et al. 2012
77	WI × WI(CNN3A)	bread wheat	DH	90	Y	Mengistu et al. 2012
78	Halberd × Karl92	bread wheat	RIL	118	Y	Mason et al. 2013
79	Seri × Babax	bread wheat	RIL	167	N	Lopes et al. 2013
80	Nanda2419 × Wangshuibai	bread wheat	RIL	230	Y	Jia et al. 2013
81	Co940610 × platte	bread wheat	DH	185	Y	Elfeki et al. 2013
82	Weimai 8 × Luohan 2	bread wheat	RIL	302	Y	Wang et al. 2013a
83	Cheyenne (CNN) × CNN(WI3A)	bread wheat	RIL	95	Y	Rustgi et al. 2013
84	Hanxuan 10 × Lumai 14	bread wheat	DH	150	Y	Liu et al. 2013c
85	SuperHead#2 × Roshan	bread wheat	RIL	186	Y	Azadi et al. 2014
86	Rio Blanco × IDO444	bread wheat	RIL	159	Y	Zhang et al. 2014
87	W7984 × Opata M85	bread wheat	DH	163	N	Williams et al. 2014
	Cayuga × Caledonia	bread wheat	DH	161	N	Williams et al. 2014
88	SHW-L1 × Chanmai 32	bread wheat	RIL	171	Y	Yu et al. 2014
89	Chinese Spring × S-6214	bread wheat	F2	117	Y	Katkout et al. 2014
90	Drysdale × Gladius	bread wheat	RIL	205	Y	Maphosa et al. 2014
91	Zhou 8425B × Chinese spring	bread wheat	RIL	246	Y	Gao et al. 2015
92	WCB414 × WCB617	bread wheat	RIL	163	N	Echeverry-Solarte et al. 2015
93	Shannong01-35 × Gaocheng9411	bread wheat	RIL	182	N	Li et al. 2015c
94	Ning7840 × Clark	bread wheat	RIL	127	Y	Li et al. 2015a
95	Kenong9204 × Jing411	bread wheat	RIL	188	N	Fan et al. 2015
96	Yanda1817 × Beinong6	bread wheat	RIL	268	Y	Wu et al. 2015a
97	T. aestivum L. ‘Forno’ × T. spelta L. ‘Oberkulmer’	bread wheat	RIL	226	Y	Xie et al. 2015
98	Attila/Kauz × Karchia	bread wheat	RIL	179	Y	Narjesi et al. 2015
99	Kenong 9204 × Jing 411	bread wheat	RIL	188	Y	Cui et al. 2016
100	Neodur, Claudio × Colosseo and Rascon/2*Tarro	durum wheat	RIL	338	N	Milner et al. 2016
101	Ning7840 × Clark	bread wheat	RIL	127	Y	Li et al. 2016a
102	Ning7840 × Clark	bread wheat	RIL	127	Y	Su et al. 2016
103	Cutler × AC Barrie	bread wheat	RIL	158	N	Perez-Lara et al. 2016
104	HD2808 × HUW510	bread wheat	RIL	251	Y	Bhusal et al. 2017
105	Pioneer Brand 26R61 × AGS2000	bread wheat	RIL	157	N	Mason et al. 2017
106	UC1113 × Kofa	durum wheat	RIL	93	Y	Roncallo et al. 2017
107	KT1-1 × KT3-5	einkorn wheat	RIL	109	Y	Yu et al. 2017
108	Pubing 3504 × Jing 4839	bread wheat	F2:3	282	Y	Chen et al. 2017
109	Huapei 3 × Yumai 57	bread wheat	DH	168	Y	Deng et al. 2017
110	Nanda2419 × Wangshuibai	bread wheat	RIL	134	Y	Cheng et al. 2017
111	CO960293-2 × TAM 111	bread wheat	RIL	217	N	Assanga et al. 2017
112	Shixin828 × Kenong2007	bread wheat	RIL	163	Y	Su et al. 2018
113	Doumai × Shi 4185	bread wheat	RIL	275	Y	Li et al. 2018
	Gaocheng 8901 × Zhoumai 16	bread wheat	RIL	176	Y	Li et al. 2018
	Linmai 2 × Zhong 892	bread wheat	RIL	273	Y	Li et al. 2018
114	RL4452 × AC Domain	bread wheat	DH	193	Y	Cabral et al. 2018
115	Excalibur × Kukri	bread wheat	DH	233	Y	Tura et al. 2019
116	WL711 × C306	bread wheat	RIL	206	Y	Goel et al. 2019
117	SYN-D × Weebill 1	bread wheat	RIL	267	Y	Liu et al. 2019
118	Yanzhan 1 × Cayazheda 29	bread wheat	RIL	82	N	Hu et al. 2020
	Yanzhan 1 × Yunnanxiaomai	bread wheat	RIL	98	N	Hu et al. 2020
	Yanzhan 1 × Yutiandaomai	bread wheat	RIL	93	N	Hu et al. 2020
	Yanzhan 1 × Hussar	bread wheat	RIL	97	N	Hu et al. 2020
119	Zhongmai 871 × Zhongmai 895	bread wheat	RIL	266	Y	Yang et al. 2020b
a The number of the previous QTL studies
b RIL, Recombinant Inbred Line population; DH, Double-haploid population; BCxFx, Backcross population
c Y represents the collected genetic map information of the QTL mapping population, and N represents not obtained.

## Sheet: Table S2
Table S2 Original QTL information for Meta-QTL analysis
Initial QTLsa	Chr	Position in original maps	LOD	R2	Associated raw traits from previous studies	The QTL most likely position in consensus map	Confidence interval start position in consensus map	Confidence interval stop position in consensus map	Reference
QTL1	4A	85.6	3	27	Plant yield	16.7	13.6199	19.7801	Araki et al. 1999
QTL2	4A	85.6	3	52	Spikelet no./ear	16.7	15.1007	18.2993	Araki et al. 1999
QTL3	4A	85.6	3	27	Grain wt./ear	16.7	13.6199	19.7801	Araki et al. 1999
QTL4	4A	85.60--91.80	3	12	Grain wt./ear	17.75	10.8197	24.6803	Araki et al. 1999
QTL5	4A	85.6	3	17	50-grain weight	16.7	11.808	21.592	Araki et al. 1999
QTL6	4A	22.7	3	37	Ear emergence time				Araki et al. 1999
QTL7	3B	NA	3	12.2	Thousand kernel weight	69.7	61.1355	78.2645	Campbell et al. 1999
QTL8	1A	NA	3	11.8	Thousandk ernel weight	40.6	31.7452	49.4548	Campbell et al. 1999
QTL9	3D	NA	3	10.9	Thousandk ernel weight	46.6	37.014	56.186	Campbell et al. 1999
QTL10	2A	NA	3	5.8	Thousandk ernel weight	51.8	33.785	69.815	Campbell et al. 1999
QTL11	1B	NA	3	11.1	Thousand kernel weight				Campbell et al. 1999
QTL12	3A	35	3	8.8	Kernel number spike (KPS)	32.3	13.7773	50.8227	Shah et al. 1999
QTL13	3A	76.9	3	12.2	1000 Kernel weight (Thousand kernel weightT)	52.6	39.2393	65.9607	Shah et al. 1999
QTL14	3A	0	3	18.3	Kernel number spike (KPS)				Shah et al. 1999
QTL15	3A	87.1	3	12.3	Kernel number spike (KPS)				Shah et al. 1999
QTL16	3A	0	3	7.5	1000 Kernel weight (Thousand kernel weightT)				Shah et al. 1999
QTL17	5A	NA	8.7	21	Grain yield	113.8	110.511	117.089	Kato et al. 2000
QTL18	5A	NA	8.7	8	Grain yield	64.16	55.5265	72.7935	Kato et al. 2000
QTL19	5A	NA	8.7	12	Grain yield	54.05	48.2944	59.8056	Kato et al. 2000
QTL20	5A	NA	8.8	37	Tiller number/Plant	64.16	62.2933	66.0267	Kato et al. 2000
QTL21	5A	NA	8.8	10	Tiller number/Plant	89.9	82.9932	96.8068	Kato et al. 2000
QTL22	5A	NA	8.6	16	Ear grain weight	54.05	49.7333	58.3667	Kato et al. 2000
QTL23	5A	NA	8.5	19	50-grain weight	89.9	86.2649	93.5351	Kato et al. 2000
QTL24	5A	NA	8.4	11	50-grain weight	64.16	57.8811	70.4389	Kato et al. 2000
QTL25	5A	NA	8.3	39	Spikelet number/ear	89.9	88.129	91.671	Kato et al. 2000
QTL26	5A	NA	8.5	49	Spikelet number/ear	64.16	62.7505	65.5695	Kato et al. 2000
QTL27	5A	NA	8.9	26	Spikelet number/ear	89.9	87.2435	92.5565	Kato et al. 2000
QTL28	5A	NA	8.9	16	Spikelet number/ear	54.05	49.7333	58.3667	Kato et al. 2000
QTL29	5A	NA	8.9	37	Ear grain weight				Kato et al. 2000
QTL30	5A	NA	8.9	18	Ear grain weight				Kato et al. 2000
QTL31	5A	NA	8.9	14	Spikelet number/ear				Kato et al. 2000
QTL32	5A	NA	8.6	10	Tiller number/Plant				Kato et al. 2000
QTL33	6A	NA	8.19	10	Tiller per plant	33.1	25.7577	40.4423	Li et al. 2002
QTL34	1B	NA	5.18	10	Spike length	38.6	31.2577	45.9423	Li et al. 2002
QTL35	4A	NA	5	10	Spike length	57.3	49.9577	64.6423	Li et al. 2002
QTL36	2D	NA	5.57	10	Spikelet number	5.1	-2.24234	12.4423	Li et al. 2002
QTL37	2D	NA	3.72	10	Tiller per plant	5.1	-2.24234	12.4423	Li et al. 2002
QTL38	2D	NA	8.85	10	Days to heading	5.1	-2.24234	12.4423	Li et al. 2002
QTL39	1D	NA	3.59	10	Tiller per plant	26.7	19.3577	34.0423	Li et al. 2002
QTL40	1A	NA	3.53	10	Spike length				Li et al. 2002
QTL41	2D	NA	20.5	10.6	Thousand kernel weight	5.1	-0.769221	10.9692	Ayala et al. 2002
QTL42	3B	NA	11.4	5	Thousand kernel weight	25	12.5573	37.4427	Ayala et al. 2002
QTL43	5D	NA	13.7	9.8	No. of tillers	84.8	78.4517	91.1483	Ayala et al. 2002
QTL44	3B	NA	10.5	10.2	Biomass	57.9	51.8006	63.9994	Ayala et al. 2002
QTL45	6A	NA	9.1	9.6	Biomass	27.6	21.1194	34.0806	Ayala et al. 2002
QTL46	3B	NA	11	3.7	Yield	54.2	37.3855	71.0145	Ayala et al. 2002
QTL47	3D	NA	19.4	10.6	Yield	46.6	40.7308	52.4692	Ayala et al. 2002
QTL48	6B	NA	17.1	8.5	Yield	51.9	44.5807	59.2193	Ayala et al. 2002
QTL49	7B	NA	12.8	5.8	Thousand kernel weight	114.4	103.673	125.127	Ayala et al. 2002
QTL50	3D	NA	11.4	5.7	Biomass	41.1	28.8793	53.3207	Ayala et al. 2002
QTL51	6A	NA	17	10.3	Biomass	21.6	14.8371	28.3629	Ayala et al. 2002
QTL52	6A	NA	22.6	13.8	Yield	21.6	16.5523	26.6477	Ayala et al. 2002
QTL53	6A	NA	19.1	13.3	Thousand kernel weight	21.6	16.3625	26.8375	Ayala et al. 2002
QTL54	2D	NA	20.1	15.8	Biomass				Ayala et al. 2002
QTL55	2D	NA	18.4	14.6	Yield				Ayala et al. 2002
QTL56	4A	NA	12.2	6.7	Thousand kernel weight				Ayala et al. 2002
QTL57	2A	0	3	17.2	Thousand kernel weight	17.2	-4.19858	38.5986	Huang et al. 2003
QTL58	2D	114.8	2.6	15.4	Thousand kernel weight				Huang et al. 2003
QTL59	4D	0	2.5	14.3	Thousand kernel weight				Huang et al. 2003
QTL60	5B	28.3	2.8	16	Thousand kernel weight	59.4	36.3965	82.4035	Huang et al. 2003
QTL61	7A	73.7	2.5	14.5	Thousand kernel weight	67.3	41.9169	92.6831	Huang et al. 2003
QTL62	7B	56.4	3.6	20.6	Thousand kernel weight	58.5	40.6332	76.3668	Huang et al. 2003
QTL63	7B	66.2	4.7	25.9	Thousand kernel weight				Huang et al. 2003
QTL64	7D	78.7	3	17.3	Thousand kernel weight				Huang et al. 2003
QTL65	1B	36.8	1.8	10.5	Tiller number				Huang et al. 2003
QTL66	2A	112.7	2.1	12.6	Tiller number	117.9	88.6892	147.111	Huang et al. 2003
QTL67	2D	96.2	2	11.7	Tiller number	19.7	-11.7577	51.1577	Huang et al. 2003
QTL68	3B	65.6	1.9	11	Tiller number	60.1	26.6404	93.5596	Huang et al. 2003
QTL69	4D	2.1	1.6	9.2	Tiller number				Huang et al. 2003
QTL70	5D	188.1	2.1	12.3	Tiller number	90.1	60.1768	120.023	Huang et al. 2003
QTL71	6D	116.9	1.8	10.8	Tiller number				Huang et al. 2003
QTL72	7A	48	1.8	10.8	Tiller number	24	-10.0792	58.0792	Huang et al. 2003
QTL73	1A	114.8	1.9	11.7	Grain yield	128.4	96.9423	159.858	Huang et al. 2003
QTL74	1B	66.2	1.6	9.7	Grain yield	55.1	17.1561	93.0439	Huang et al. 2003
QTL75	2A	61.4	2.6	15.2	Grain yield	49.5	25.2858	73.7142	Huang et al. 2003
QTL76	2B	95.1	3	17.6	Grain yield	81.8	60.8878	102.712	Huang et al. 2003
QTL77	2D	114.8	1.6	9.6	Grain yield	86.41	48.0709	124.749	Huang et al. 2003
QTL78	2D	10	1.9	11.5	Grain yield				Huang et al. 2003
QTL79	3B	14.2	1.6	9.6	Grain yield	21.2	-17.1391	59.5391	Huang et al. 2003
QTL80	3B	82.4	3.8	21.6	Grain yield				Huang et al. 2003
QTL81	4D	2.9	1.7	10.1	Grain yield				Huang et al. 2003
QTL82	4D	90.2	2.1	12.3	Grain yield				Huang et al. 2003
QTL83	5B	0	2.6	15	Grain yield	39.3	14.763	63.837	Huang et al. 2003
QTL84	2D	NA	2.22185	7.3	Kernel weight	7.9	-2.63244	18.4324	Dholakia et al. 2003
QTL85	2D	NA	1.22185	3.5	Kernel weight	5.1	-16.8677	27.0677	Dholakia et al. 2003
QTL86	1A	126.9	3	11.6	Spike length	80.8	74.1847	87.4153	Sourdille et al. 2003
QTL87	2B	126.9	3	9.8	Spike length	47	39.1696	54.8304	Sourdille et al. 2003
QTL88	2D	15.3	3	7.7	Spike length	5.1	-4.86597	15.066	Sourdille et al. 2003
QTL89	4A	10.8	3	6.9	Spike length	12.8	1.67856	23.9214	Sourdille et al. 2003
QTL90	5A	183.5	3	9.3	Spike length				Sourdille et al. 2003
QTL91	2A	43.2	3	9.5	number of spikelets	49.2	41.1223	57.2777	Sourdille et al. 2003
QTL92	2B	25.6	3	15.6	number of spikelets	47	42.0809	51.9191	Sourdille et al. 2003
QTL93	5A	87.2	3	8.8	number of spikelets				Sourdille et al. 2003
QTL94	1A	122.5	3	9.3	ear compacTiller numberess	80.8	72.5486	89.0514	Sourdille et al. 2003
QTL95	2A	87.8	3	10.6	ear compacTiller numberess	61.1	53.8606	68.3394	Sourdille et al. 2003
QTL96	2B	19.4	3	9.3	ear compacTiller numberess	47	38.7486	55.2514	Sourdille et al. 2003
QTL97	2D	12.9	3	9.9	ear compacTiller numberess	5.1	-2.65131	12.8513	Sourdille et al. 2003
QTL98	4A	8.7	3	10.1	ear compacTiller numberess	23.1	15.5022	30.6978	Sourdille et al. 2003
QTL99	5A	220.8	3	7.9	ear compacTiller numberess				Sourdille et al. 2003
QTL100	5D	149.2	3	13.6	ear compacTiller numberess	45.6	39.9575	51.2425	Sourdille et al. 2003
QTL101	6D	68	3	12.2	ear compacTiller numberess	83.7	77.41	89.99	Sourdille et al. 2003
QTL102	4A	78.90-81.40	3	10	Spike length	57.2	50.0509	64.3491	Börner et al. 2003
QTL103	4A	0.00-18.8	3	10	Spike length	14.45	7.30088	21.5991	Börner et al. 2003
QTL104	4A	24.20-34.50	3	10	Spike length	21.95	14.8009	29.0991	Börner et al. 2003
QTL105	5A	49.30-60.40	3	10	Spike length	54.65	47.5009	61.7991	Börner et al. 2003
QTL106	1B	44.9-62.00	3	10	Spike length	38.5	31.3509	45.6491	Börner et al. 2003
QTL107	1B	59.10-62.00	3	10	Spike length	41.3	34.1509	48.4491	Börner et al. 2003
QTL108	2D	18.40-58.30	3	10	Grain number	7.2	0.0508772	14.3491	Börner et al. 2003
QTL109	4A	78.90-83.30	3	10	Grain number	57.85	50.7009	64.9991	Börner et al. 2003
QTL110	4A	44.40-78.90	3	10	Grain number	46.7	39.5509	53.8491	Börner et al. 2003
QTL111	2D	38	3	10	Grain weight per ear	6.6	-0.549123	13.7491	Börner et al. 2003
QTL112	2D	73.9	3	10	Grain weight per ear	5.1	-2.04912	12.2491	Börner et al. 2003
QTL113	5A	97.30-126.50	3	10	Grain weight per ear	85.8	78.6509	92.9491	Börner et al. 2003
QTL114	2D	54.2	3	10	Grain weight per ear	5.1	-2.04912	12.2491	Börner et al. 2003
QTL115	6B	78.60-83.80	3	10	Grain weight per ear	65.3	58.1509	72.4491	Börner et al. 2003
QTL116	4A	78.90-83.30	3	10	Grain weight per ear	57.85	50.7009	64.9991	Börner et al. 2003
QTL117	3A	88.40-90.60	3	10	Thousand kernel weight	69.6	62.4509	76.7491	Börner et al. 2003
QTL118	6B	51.40-55.80	3	10	Thousand kernel weight	52.95	45.8009	60.0991	Börner et al. 2003
QTL119	1B	68.60-75.30	3	10	KNP, YLD, GWH, SNP, SWP	39.25	21.5833	56.9167	Peng et al. 2003
QTL120	1B	133.9	3	10	KNP, KNS, KNL, YLD, SNP, SLS, SWP, SSW	55.4	37.7333	73.0667	Peng et al. 2003
QTL121	2A	200	3	10	KNP, KNS, YLD, HD, SNP, SWP	63.6	45.9333	81.2667	Peng et al. 2003
QTL122	2A	200	3	10	KNP, KNS, KNL, YLD, GWH, SLS, SSW, SWP	63.6	45.9333	81.2667	Peng et al. 2003
QTL123	3A	148.1	3	10	KNP, KNS, KNL, YLD, SSW, SWP	41.6	23.9333	59.2667	Peng et al. 2003
QTL124	5A	72.5	3	10	KNP, KNS, KNL, YLD, HT, SLS, SSW, SWP	34.3	16.6333	51.9667	Peng et al. 2003
QTL125	5A	144.2	3	10	KNP, KNS, KNL, YLD, HT, SLS, SSW, SWP	55.9	38.2333	73.5667	Peng et al. 2003
QTL126	3A	39	3	4.8	Thousand kernel weight	71.75	63.1311	80.3689	Groos et al. 2003
QTL127	2D	37	3	6.8	Thousand kernel weight	3.85	-2.23391	9.93391	Groos et al. 2003
QTL128	1D	76	3	8.7	Thousand kernel weight	46.5	41.7448	51.2552	Groos et al. 2003
QTL129	6D	101	3	7.5	Thousand kernel weight	55.55	50.0339	61.0661	Groos et al. 2003
QTL130	3B	58	3	6.5	Yield	35.7	29.3353	42.0647	Groos et al. 2003
QTL131	5B	38	3	6.8	Yield	90.9	84.8161	96.9839	Groos et al. 2003
QTL132	5B	38	3	10.4	Thousand kernel weight	90.9	86.9221	94.8779	Groos et al. 2003
QTL133	2B	158	3	5.6	Yield	72.5	65.1124	79.8876	Groos et al. 2003
QTL134	4A	NA	3	5.4	Yield	75.7	68.0388	83.3612	Groos et al. 2003
QTL135	4B	18	3	6.1	Yield	37.3	30.5179	44.0821	Groos et al. 2003
QTL136	5A	114	3	5.2	Yield	55.9	47.9441	63.8559	Groos et al. 2003
QTL137	7D	NA	3	6.3	Yield	34	27.4332	40.5668	Groos et al. 2003
QTL138	7D	58	3	5.7	Yield	160.5	153.242	167.758	Groos et al. 2003
QTL139	2B	72	3	19.7	Thousand kernel weight	72.5	70.4	74.6	Groos et al. 2003
QTL140	6A	19	3	6.7	Thousand kernel weight	67.7	61.5253	73.8747	Groos et al. 2003
QTL141	7A	140	3	10.3	Thousand kernel weight	33.1	29.0834	37.1166	Groos et al. 2003
QTL142	7D	62	3	7.5	Thousand kernel weight	160.5	154.984	166.016	Groos et al. 2003
QTL143	1D	101.5	2.3	9.3	Grain number per spike				Huang et al. 2004
QTL144	2A	51.1	2.4	9.8	Grain number per spike	54.6	30.2389	78.9611	Huang et al. 2004
QTL145	3D	0	3.9	15	Grain number per spike	19.3	3.38408	35.2159	Huang et al. 2004
QTL146	7A	101.7	3	11.6	Grain number per spike	101.2	80.6191	121.781	Huang et al. 2004
QTL147	6A	5.5	3	11.8	Grain number per spike				Huang et al. 2004
QTL148	6A	9.5	2.5	9.9	Grain number per spike				Huang et al. 2004
QTL149	7A	9.5	2.9	11.3	Grain number per spike				Huang et al. 2004
QTL150	7D	38.1	2.1	8.2	Grain number per spike				Huang et al. 2004
QTL151	6A	0	2.2	8.6	Grain weight per spike	19	-8.76032	46.7603	Huang et al. 2004
QTL152	3B	0	2	8	Grain weight per spike				Huang et al. 2004
QTL153	3B	91.7	2.3	9.3	Grain weight per spike				Huang et al. 2004
QTL154	6D	184.3	2.6	10.2	Grain weight per spike				Huang et al. 2004
QTL155	7D	38.1	7.9	12.2	Grain weight per spike				Huang et al. 2004
QTL156	2A	51.1	2.6	10.3	Thousand kernel weight	54.6	31.4215	77.7785	Huang et al. 2004
QTL157	2D	110.6	4.1	15.8	Thousand kernel weight	86.41	71.3	101.52	Huang et al. 2004
QTL158	3B	112.7	2.8	10.9	Thousand kernel weight	106.1	84.1974	128.003	Huang et al. 2004
QTL159	3D	0	2.3	9.2	Thousand kernel weight	19.3	-6.64986	45.2499	Huang et al. 2004
QTL160	4B	16.1	3.2	12.3	Thousand kernel weight	26.7	7.29035	46.1097	Huang et al. 2004
QTL161	6A	0	3.9	15.8	Thousand kernel weight	19	3.88995	34.11	Huang et al. 2004
QTL162	7A	101.7	4.6	16.9	Thousand kernel weight	101.2	87.0734	115.327	Huang et al. 2004
QTL163	1B	46.4	3.3	12.6	Thousand kernel weight				Huang et al. 2004
QTL164	1D	101.5	2.4	9.3	Thousand kernel weight				Huang et al. 2004
QTL165	3A	92.8	2.1	8.4	Thousand kernel weight				Huang et al. 2004
QTL166	3B	0	2.9	11.5	Thousand kernel weight				Huang et al. 2004
QTL167	6A	18.8	6.2	22.6	Thousand kernel weight				Huang et al. 2004
QTL168	7A	9.5	3.3	12.7	Thousand kernel weight				Huang et al. 2004
QTL169	7D	38.1	7.8	25.2	Thousand kernel weight				Huang et al. 2004
QTL170	3D	4.3	6.2	23	Grain yield	40.9	30.5201	51.2799	Huang et al. 2004
QTL171	5A	0	3.7	14.2	Grain yield	49.6	32.7874	66.4126	Huang et al. 2004
QTL172	5A	47.3	3.3	12.7	Grain yield	55.9	37.1017	74.6983	Huang et al. 2004
QTL173	6B	65.3	2.7	11.8	Grain yield	44.8	24.5679	65.0321	Huang et al. 2004
QTL174	6D	180.3	2.9	11.4	Grain yield	203	182.058	223.942	Huang et al. 2004
QTL175	1A	0	4.1	15.8	Grain yield				Huang et al. 2004
QTL176	4D	NA	5.2	19.3	Grain yield				Huang et al. 2004
QTL177	5B	131.9	2.6	10	Grain yield				Huang et al. 2004
QTL178	6D	102.2	3.4	13	Grain yield				Huang et al. 2004
QTL179	6B	NA	3	10	Thousand kernel weight	45.5	38.3509	52.6491	Elouafi and Nachit, 2004
QTL180	6B	NA	3	10	Thousand kernel weight				Elouafi and Nachit, 2004
QTL181	2A	54.1	17	9	Thresha bility				Jantasuriyarat et al. 2004
QTL182	2B	157.6	25.3	13	Thresha bility	97.8	92.1007	103.499	Jantasuriyarat et al. 2004
QTL183	2D	49.5	86.4	45	Thresha bility	5.1	3.45354	6.74646	Jantasuriyarat et al. 2004
QTL184	5A	117.5	21.6	10	Thresha bility	89.3	81.8909	96.7091	Jantasuriyarat et al. 2004
QTL185	6A	75.9	24.1	15	Thresha bility	51.1	46.1606	56.0394	Jantasuriyarat et al. 2004
QTL186	6D	180	19.8	10	Thresha bility	114.5	107.091	121.909	Jantasuriyarat et al. 2004
QTL187	2B	119	16.7	7	Rachis fragility	78.7	68.1156	89.2844	Jantasuriyarat et al. 2004
QTL188	2D	49.5	81.2	43	Rachis fragility	5.1	3.37696	6.82304	Jantasuriyarat et al. 2004
QTL189	5A	117.5	29.8	16	Rachis fragility	89.3	84.6693	93.9307	Jantasuriyarat et al. 2004
QTL190	7B	50.3	22.6	9	Rachis fragility	65.4	57.1677	73.6323	Jantasuriyarat et al. 2004
QTL191	2A	43	3	4	Grain yield	49.4	29.6885	69.1115	McCartney et al. 2005
QTL192	2B	59	9.4	13.3	Grain yield	48.2	42.2717	54.1283	McCartney et al. 2005
QTL193	3D	246	2.5	3.7	Grain yield	80.6	59.2902	101.91	McCartney et al. 2005
QTL194	4A	7.00-21.00	4.4	6.3	Grain yield	41.15	28.6347	53.6653	McCartney et al. 2005
QTL195	4D	1.00-6.00	2.8	4.8	Grain yield	14.15	-2.27628	30.5763	McCartney et al. 2005
QTL196	4A	48.00-58.00	6.7	7.6	Thousand kernel weight	63.2	52.8255	73.5745	McCartney et al. 2005
QTL197	4B	30.00-30.00	11.6	11.9	Thousand kernel weight	27.6	20.9743	34.2257	McCartney et al. 2005
QTL198	2A	45.00-71.00	2.6	3	Thousand kernel weight	57.3	31.0179	83.5821	McCartney et al. 2005
QTL199	6D	55.00-99.00	3.9	3.6	Thousand kernel weight	71.7	49.7983	93.6017	McCartney et al. 2005
QTL200	4D	1.00-6.00	20.9	31.8	Thousand kernel weight	4.95	2.47056	7.42944	McCartney et al. 2005
QTL201	3D	171.00-214.00	4.3	6	Thousand kernel weight	44.7	31.559	57.841	McCartney et al. 2005
QTL202	1B	120.00-120.10	3	16.6	Ear per plant, Grains per ear, Thousand grain weight	46.1	37.0952	55.1048	Quarrie et al. 2005
QTL203	3D	128.60-140.00	3	17.7	Ear per plant, Thousand grain weight	43.5	35.0548	51.9452	Quarrie et al. 2005
QTL204	4A	47.4	3	14.9	Ear per plant,Grains per ear, Thousand grain weight	74.4	64.3678	84.4322	Quarrie et al. 2005
QTL205	4A	200.7	3	12.1	Grains per ear, Thousand grain weight	2.8	-9.55365	15.1537	Quarrie et al. 2005
QTL206	4B	25.80-75.30	3	14.4	Ear per plant and Grains per ear	19.35	8.9695	29.7305	Quarrie et al. 2005
QTL207	4D	25.8	3	16.8	Thousand grain weight	38	29.1024	46.8976	Quarrie et al. 2005
QTL208	5A	117	3	16.4	Ear per plant, Grains per ear, Thousand grain weight	64.16	55.0454	73.2746	Quarrie et al. 2005
QTL209	5B	33.10-56.70	3	21.6	Grains per ear, Thousand grain weight	12.3	5.37967	19.2203	Quarrie et al. 2005
QTL210	5D	70.5	3	20.5	Grains per ear	24.3	17.0083	31.5917	Quarrie et al. 2005
QTL211	5D	228.4	3	15.5	Ear per plant, Grains per ear, Thousand grain weight	71.2	61.5562	80.8438	Quarrie et al. 2005
QTL212	7A	178.6	3	18.3	Grains per ear	128.7	120.532	136.868	Quarrie et al. 2005
QTL213	1A	NA	113.4	62.9	Spike number per plant	12	9.86785	14.1321	Suenage et al. 2005
QTL214	2B	NA	17.51	8.9	Spike number per plant	99.8	84.7312	114.869	Suenage et al. 2005
QTL215	1A	NA	32.34	16.3	Spike number per plant	12	3.77226	20.2277	Suenage et al. 2005
QTL216	2D	NA	12.83	10.2	Spike number per plant	5.1	-8.04825	18.2482	Suenage et al. 2005
QTL217	1A	NA	34.9	16	Spike length	12	3.61799	20.382	Suenage et al. 2005
QTL218	2D	NA	60.91	25.8	Spike length	5.1	-0.0981453	10.2981	Suenage et al. 2005
QTL219	5D	NA	14.54	3.6	Spike length	95.9	58.6466	133.153	Suenage et al. 2005
QTL220	7D	NA	19.46	1.3	Spike length	109.7	6.53681	212.863	Suenage et al. 2005
QTL221	2D	NA	63.26	30.3	Spike length	5.1	0.673856	9.52614	Suenage et al. 2005
QTL222	5D	NA	17.29	4.3	Spike length	42.6	11.4111	73.7889	Suenage et al. 2005
QTL223	6A	NA	22.24	3.5	Spike length	112.5	74.1822	150.818	Suenage et al. 2005
QTL224	7D	NA	14.37	3.5	Spike length	70.5	32.1822	108.818	Suenage et al. 2005
QTL225	7D	NA	15.64	2.6	Spike length	89.7	38.1184	141.282	Suenage et al. 2005
QTL226	1A	NA	14	10.4	Spike length	12	-0.895399	24.8954	Suenage et al. 2005
QTL227	2D	NA	35.7	27	Spike length	0	-4.96712	4.96712	Suenage et al. 2005
QTL228	2D	0.00-15.00	3	14.9	Seed weight from sample ears	5.85	-4.18216	15.8822	Verma et al. 2005
QTL229	1B1	25.00-37.00	3	15.2	Number of seeds from sample ears	47.95	38.1158	57.7842	Verma et al. 2005
QTL230	1B1	25.00-37.00	3	17.2	Seed weight from sample ears	47.95	39.2594	56.6406	Verma et al. 2005
QTL231	1B2	0.00-12.00	3	18.7	Seed weight from sample ears	84.7	76.7065	92.6935	Verma et al. 2005
QTL232	6A1	0.00-7.00	3	4.3	Number of seeds from sample ears	18.1	-16.6626	52.8626	Verma et al. 2005
QTL233	2A2	56.00-67.00	3	17.6	Seed weight from sample ears	55.2	46.7069	63.6931	Verma et al. 2005
QTL234	2D	0.00-15.00	3	9.7	Ear length	5.85	-9.56022	21.2602	Verma et al. 2005
QTL235	2B	18.00-38.00	3	32.4	Seed weight from sample ears	87.15	82.5364	91.7636	Verma et al. 2005
QTL236	1D	0	3	8.9	Seed weight from sample ears	58.9	42.1046	75.6954	Verma et al. 2005
QTL237	4D1	25	3	15.3	Ear length	14.4	4.63012	24.1699	Verma et al. 2005
QTL238	2D	15.7	4.5	12.2	Grain number per spike	14	8.93915	19.0609	Marza et al. 2006
QTL239	3B	74.9	3.9	8.7	Grain number per spike	7	-0.0968304	14.0968	Marza et al. 2006
QTL240	3B	74.9	4.8	11.3	Grain weight per spike	7	1.53607	12.4639	Marza et al. 2006
QTL241	5A	25.3	4.7	10.7	Grain weight per spike	46.5	40.7297	52.2703	Marza et al. 2006
QTL242	7A	103.2	7	21.1	Grain yield	72.1	69.1738	75.0262	Marza et al. 2006
QTL243	7D3	6.8	3.8	14.1	Spike density	104.2	99.8211	108.579	Marza et al. 2006
QTL244	4B	83.2	8.2	18	Spike length	24.2	20.7699	27.6301	Marza et al. 2006
QTL245	3B	54.8	4.3	10.6	Spike number	21.2	15.3752	27.0248	Marza et al. 2006
QTL246	3D	#REF!	5.6	13.2	Grain number per spike	19.3	8.73381	29.8662	Narasimhamoorthy et al. 2006
QTL247	2D	#N/A	6.04	12.2	Grain yield	5.1	-6.33227	16.5323	Narasimhamoorthy et al. 2006
QTL248	7D	#N/A	4.01	9	Grain yield	163.6	148.103	179.097	Narasimhamoorthy et al. 2006
QTL249	2D	#N/A	4.03	6.6	Days to heading	5.1	-16.0324	26.2324	Narasimhamoorthy et al. 2006
QTL250	3D	#N/A	4.98	10.5	Days to heading	19.3	6.01679	32.5832	Narasimhamoorthy et al. 2006
QTL251	1D	75	3	10	Grain number per spike	75.4	48.0804	102.72	Liu et al. 2006
QTL252	1D	6	3	10	Grain number per spike	8.3	-19.0196	35.6196	Liu et al. 2006
QTL253	4B	32	3	10	Grain number per spike	27.1	-0.219588	54.4196	Liu et al. 2006
QTL254	5A	64	3	10	Grain number per spike	55.9	28.5804	83.2196	Liu et al. 2006
QTL255	5A	52	3	10	Grain number per spike	52.1	24.7804	79.4196	Liu et al. 2006
QTL256	5B	57	3	10	Grain number per spike	60.2	32.8804	87.5196	Liu et al. 2006
QTL257	5D	65	3	10	Grain number per spike	70.2	42.8804	97.5196	Liu et al. 2006
QTL258	5D	NA	3	10	Grain number per spike	23	-4.31959	50.3196	Liu et al. 2006
QTL259	3D	21	3	10	Grain weight per plant	42.6	15.2804	69.9196	Liu et al. 2006
QTL260	5A	52	3	10	Grain weight per plant	52.1	24.7804	79.4196	Liu et al. 2006
QTL261	7A	77	3	10	Grain weight per plant	71.4	44.0804	98.7196	Liu et al. 2006
QTL262	2A	60	3	10	Spike length	54.6	27.2804	81.9196	Liu et al. 2006
QTL263	2D	63	3	10	Spike length	7.9	-19.4196	35.2196	Liu et al. 2006
QTL264	2D	115	3	10	Spike length	29.3	1.98041	56.6196	Liu et al. 2006
QTL265	4B	32	3	10	Spike length	27.1	-0.219588	54.4196	Liu et al. 2006
QTL266	5A	61	3	10	Spike length	49.6	22.2804	76.9196	Liu et al. 2006
QTL267	5D	87	3	10	Spike length	108.19	80.8704	135.51	Liu et al. 2006
QTL268	2D	48	3	10	Spike number per plant	6.6	-20.7196	33.9196	Liu et al. 2006
QTL269	3D	21	3	10	Spike number per plant	42.6	15.2804	69.9196	Liu et al. 2006
QTL270	4B	32	3	10	Spike number per plant	27.1	-0.219588	54.4196	Liu et al. 2006
QTL271	5A	52	3	10	Spike number per plant	52.1	24.7804	79.4196	Liu et al. 2006
QTL272	6A	13	3	10	Spike number per plant	19	-8.31959	46.3196	Liu et al. 2006
QTL273	6D	110	3	10	Spike number per plant	37.2	9.88041	64.5196	Liu et al. 2006
QTL274	1D	75	3	10	Spikelet number per spike	75.4	48.0804	102.72	Liu et al. 2006
QTL275	2D	63	3	10	Spikelet number per spike	7.9	-19.4196	35.2196	Liu et al. 2006
QTL276	3D	20	3	10	Spikelet number per spike	43.5	16.1804	70.8196	Liu et al. 2006
QTL277	3D	21	3	10	Spikelet number per spike	42.6	15.2804	69.9196	Liu et al. 2006
QTL278	5A	52	3	10	Spikelet number per spike	52.1	24.7804	79.4196	Liu et al. 2006
QTL279	5B	57	3	10	Spikelet number per spike	60.2	32.8804	87.5196	Liu et al. 2006
QTL280	5D	50	3	10	Spikelet number per spike	47	19.6804	74.3196	Liu et al. 2006
QTL281	5D	87	3	10	Spikelet number per spike	108.19	80.8704	135.51	Liu et al. 2006
QTL282	5D	NA	3	10	Spikelet number per spike	23	-4.31959	50.3196	Liu et al. 2006
QTL283	2A	60	3	10	Thousand grain weight	54.6	27.2804	81.9196	Liu et al. 2006
QTL284	3B	63	3	10	Thousand grain weight	59.9	32.5804	87.2196	Liu et al. 2006
QTL285	4A	18	3	10	Thousand grain weight	37.9	10.5804	65.2196	Liu et al. 2006
QTL286	5B	57	3	10	Thousand grain weight	60.2	32.8804	87.5196	Liu et al. 2006
QTL287	7D	89	3	10	Thousand grain weight	89.7	62.3804	117.02	Liu et al. 2006
QTL288	7A	NA	3.1	8.1	Grain yield	55.4	45.8238	64.9762	Huang et al. 2006
QTL289	7B	26.9	2.9	8.8	Grain yield	28.6	19.7855	37.4145	Huang et al. 2006
QTL290	2B	#N/A	3.1	6.6	Thousand-grain weight	5.1	-6.65266	16.8527	Huang et al. 2006
QTL291	2D	#N/A	6.5	9.2	Thousand-grain weight	0	-8.43126	8.43126	Huang et al. 2006
QTL292	3B	#N/A	3.1	3.7	Thousand-grain weight	66.3	45.3358	87.2642	Huang et al. 2006
QTL293	4B	67.1	4.6	6.1	Thousand-grain weight	44.2	31.484	56.916	Huang et al. 2006
QTL294	4D	#N/A	10.9	26.3	Thousand-grain weight	29.3	26.3507	32.2493	Huang et al. 2006
QTL295	6A	#N/A	7.3	13.9	Thousand-grain weight	53.9	48.3196	59.4804	Huang et al. 2006
QTL296	2D	#N/A	2.9	5	Days to maturity	0	-15.5135	15.5135	Huang et al. 2006
QTL297	5D	105.7	3.2	6.8	Days to maturity	95.2	83.793	106.607	Huang et al. 2006
QTL298	7D	0	6.7	31.6	Days to maturity	70.5	68.0453	72.9547	Huang et al. 2006
QTL299	5D	NA	11.5	28.7	Tiller number	70.7	67.3667	74.0333	Su et al. 2006
QTL300	5D	NA	17.9	34.6	Tiller number	70.7	67.9351	73.4649	Su et al. 2006
QTL301	1B	NA	7.6	11.4	Tiller number	93.905	85.5132	102.297	Su et al. 2006
QTL302	2D	NA	4.6	11.4	Tiller number	55.355	46.9632	63.7468	Su et al. 2006
QTL303	3A	NA	4.7	19.8	Tiller number	63.74	58.9084	68.5716	Su et al. 2006
QTL304	5B	NA	3.9	5.7	Tiller number	65.1	48.3164	81.8836	Su et al. 2006
QTL305	4B	NA	4.9	21.8	Tiller number	41.7	37.3116	46.0884	Su et al. 2006
QTL306	4B	NA	3.3	11.8	Tiller number	41.7	33.5927	49.8073	Su et al. 2006
QTL307	2D	NA	9.5	17.2	Tiller number	23.65	18.088	29.212	Su et al. 2006
QTL308	2D	NA	3.6	13.9	Tiller number	5.6	-1.28249	12.4825	Su et al. 2006
QTL309	1A	NA	3.5	7.2	Tiller number	37.7	24.413	50.987	Su et al. 2006
QTL310	3A	NA	3	21	heritability estimates of grain yield	63.1	59.0148	67.1852	Dilbirligi et al. 2006
QTL311	3A	NA	3	17	heritability estimates of grain yield	41.6	36.5536	46.6464	Dilbirligi et al. 2006
QTL312	3A	NA	3	21	Kernel number per meter square	63.1	59.0148	67.1852	Dilbirligi et al. 2006
QTL313	3A	NA	3	10	Thousand kernel weight	41.6	33.0211	50.1789	Dilbirligi et al. 2006
QTL314	3A	NA	3	16	Spike number per meter square	63.1	57.7382	68.4618	Dilbirligi et al. 2006
QTL315	3A	NA	3	9	Spike number per meter square	78.1	68.5678	87.6322	Dilbirligi et al. 2006
QTL316	3A	NA	3	11	Spike number per meter square	64	56.201	71.799	Dilbirligi et al. 2006
QTL317	3A	NA	3	30	Kernel per spike	64	61.1404	66.8596	Dilbirligi et al. 2006
QTL318	7B	NA	3	10	Grain weight per spike	140	111.196	168.804	Blanco et al. 2006
QTL319	4A	#REF!	6.83	18	Grain yield	21.9	18.3348	25.4652	Kirigwi et al. 2007
QTL320	4A	#N/A	6.09	20	Grain yield	21.7	18.4913	24.9087	Kirigwi et al. 2007
QTL321	4A	#N/A	10.45	0.32	Biomass	21.9	-178.641	222.441	Kirigwi et al. 2007
QTL322	4A	#N/A	9.34	0.3	Biomass	21.7	-192.211	235.611	Kirigwi et al. 2007
QTL323	4A	#N/A	4.54	15	Spike density	21.9	17.6218	26.1782	Kirigwi et al. 2007
QTL324	4A	#N/A	4.78	16	Kernel number per meter square	21.9	17.8892	25.9108	Kirigwi et al. 2007
QTL325	4A	#N/A	5.09	23	Kernel number per meter square	21.7	18.9099	24.4901	Kirigwi et al. 2007
QTL326	4A	#N/A	7.77	26	Harvest Index	21.9	19.4318	24.3682	Kirigwi et al. 2007
QTL327	7D	0.01	4.01	14.28	Grain number per spike	85.9	80.1927	91.6073	Kumar et al. 2007
QTL328	7A	51.71	3.74	17.61	Grain number per spike	72.8	68.1719	77.4281	Kumar et al. 2007
QTL329	1D	49.71	4.91	21.91	Grain yield	107	103.28	110.72	Kumar et al. 2007
QTL330	2D	136.01	4.95	23.83	Grain yield	19.7	16.2799	23.1201	Kumar et al. 2007
QTL331	3B	183.01	3.26	18.63	Grain yield	118.8	114.425	123.175	Kumar et al. 2007
QTL332	7A	36.01	4.8	47.38	Grain yield	24	22.2799	25.7201	Kumar et al. 2007
QTL333	7A	162.51	3.35	38.3	Grain yield	101.6	99.4721	103.728	Kumar et al. 2007
QTL334	2B	53.91	3.33	12.13	Harvest Index	74.2	67.4811	80.9189	Kumar et al. 2007
QTL335	3A	90.61	4.26	14.27	Harvest Index	78.1	72.3887	83.8113	Kumar et al. 2007
QTL336	6A	90.41	3.39	12.46	Spikelet number per spike	67.7	61.1591	74.2409	Kumar et al. 2007
QTL337	7A	162.51	3.4	17.13	Tiller number	101.6	96.8423	106.358	Kumar et al. 2007
QTL338	2B	39.31	4.47	12.02	Biomass	68.95	62.1696	75.7304	Kumar et al. 2007
QTL339	2D	185.61	3.29	11.36	Spike length	26.55	19.3757	33.7243	Kumar et al. 2007
QTL340	2D	98.31	3.2	10.86	Grain yield	16.45	8.9454	23.9546	Kumar et al. 2007
QTL341	2B	55.81	5.09	18.1	Spike length	73.15	68.6472	77.6528	Kumar et al. 2007
QTL342	2B	35.51	3.71	13.61	Biomass	66.9	61.4561	72.3439	Kumar et al. 2007
QTL343	1D	155.11	4.13	11.68	Spike length	93.2	86.8566	99.5434	Kumar et al. 2007
QTL344	7A	91.31	5.64	31.03	Tiller number	59.05	56.6623	61.4377	Kumar et al. 2007
QTL345	4A	87.11	3.17	8.87	Tiller number	65.5	57.147	73.853	Kumar et al. 2007
QTL346	1B	103.01	3.37	9.74	Spike length	57.85	50.2431	65.4569	Kumar et al. 2007
QTL347	4A	75.11	4.52	11.69	Spike length	57.85	51.512	64.188	Kumar et al. 2007
QTL348	5A	97.91	4.57	16.3	Spike length	62.65	58.1045	67.1955	Kumar et al. 2007
QTL349	5A	97.91	7.6	24.04	Spikelet number per spike(SPN)	62.65	59.568	65.732	Kumar et al. 2007
QTL350	4D	8.01	2.73	16.56	Spikelet number per spike(SPN)	23.85	19.3759	28.3241	Kumar et al. 2007
QTL351	1A	103.81	3.36	22.68	Biomass	85.7	82.4332	88.9668	Kumar et al. 2007
QTL352	1B	31.81	3.02	9.06	Tiller number	37.9	29.7222	46.0778	Kumar et al. 2007
QTL353	2D	36.11	10.06	41.17	Grain yield	5.1	3.30037	6.89963	Kumar et al. 2007
QTL354	2D	36.11	13.2	52.14	Harvest Index	5.1	3.679	6.521	Kumar et al. 2007
QTL355	2D	36.11	8.72	30.15	Spike length	5.1	2.64259	7.55741	Kumar et al. 2007
QTL356	2D	36.11	10.05	29.62	Spikelet number per spike(SPN)	5.1	2.59862	7.60138	Kumar et al. 2007
QTL357	6A	73.91	3.54	10.62	Harvest Index	54.2	47.2235	61.1765	Kumar et al. 2007
QTL358	2D	144.71	3.78	14.52	Grain number per spike	29.05	23.9473	34.1527	Kumar et al. 2007
QTL359	4A	76.11	5.72	15.7	Tiller number	60	55.2808	64.7192	Kumar et al. 2007
QTL360	4A	99.51	4.65	15.51	Spike length	71.1	66.323	75.877	Kumar et al. 2007
QTL361	4B	56.31	4.21	15.41	Grain yield	54.75	49.942	59.558	Kumar et al. 2007
QTL362	4B	45.81	3.03	14.57	Harvest Index	37	31.9148	42.0852	Kumar et al. 2007
QTL363	3D	151.91	4.47	18.19	Tiller number	43.05	38.9768	47.1232	Kumar et al. 2007
QTL364	3D	119.21	4	14.42	Grain number per spike	42.1	36.9619	47.2381	Kumar et al. 2007
QTL365	5D	71.2	5.14	22.29	Spike length	47.6	44.276	50.924	Kumar et al. 2007
QTL366	2D	25.91	4.17	12.55	Grain number per spike	5.1	-0.803658	11.0037	Kumar et al. 2007
QTL367	3B	210.41	4.34	19.82	Grain number per spike	59.45	55.7118	63.1882	Kumar et al. 2007
QTL368	2D	19.11	5.55	16.72	Spike length	5.1	0.668726	9.53127	Kumar et al. 2007
QTL369	2B	14.91	3.76	11.59	Grain number per spike	60.55	54.1573	66.9427	Kumar et al. 2007
QTL370	2A	14.91	4.13	16.35	Biomass	23.65	19.1184	28.1816	Kumar et al. 2007
QTL371	2A	14.91	3.76	9.91	Grain yield	23.65	16.1736	31.1264	Kumar et al. 2007
QTL372	6D	114.91	3.47	13.33	Biomass	106.1	100.542	111.658	Kumar et al. 2007
QTL373	6D	114.91	6.3	20.57	Grain yield	106.1	102.498	109.702	Kumar et al. 2007
QTL374	6D	114.91	5.75	24.14	Tiller number	106.1	103.031	109.169	Kumar et al. 2007
QTL375	1A	27.61	4.87	14.48	Spike length	32.45	27.3332	37.5668	Kumar et al. 2007
QTL376	1B	102.51	3.27	9.13	Grain number per spike	51.4	43.2849	59.5151	Kumar et al. 2007
QTL377	3D	198.91	3.67	11.7	Grain number per spike	45.6	39.2674	51.9326	Kumar et al. 2007
QTL378	6A	27.71	3.74	9.03	Spikelet number per spike(SPN)	33.2	24.995	41.405	Kumar et al. 2007
QTL379	7A	137.21	3.06	11.4	Biomass	74.15	67.6508	80.6492	Kumar et al. 2007
QTL380	1A	79.41	3.13	12.15	Grain number per spike	63.7	57.602	69.798	Kumar et al. 2007
QTL381	7A	137.21	4.33	43.31	Grain number per spike	74.15	72.4393	75.8607	Kumar et al. 2007
QTL382	1A	79.41	3.87	11.17	Grain yield	63.7	57.067	70.333	Kumar et al. 2007
QTL383	4A	71.21	4.25	11.22	Spikelet number per spike(SPN)	57.2	50.5965	63.8035	Kumar et al. 2007
QTL384	5A	71.11	3.58	9.17	Spikelet number per spike(SPN)	54.05	45.9703	62.1297	Kumar et al. 2007
QTL385	3B	167.41	3.78	10.97	Biomass	68.45	61.696	75.204	Kumar et al. 2007
QTL386	1A	145.11	4.76	18.56	Tiller number	122	118.008	125.992	Kumar et al. 2007
QTL387	3B	380.51	3.11	10.57	Harvest Index	106.1	99.0905	113.11	Kumar et al. 2007
QTL388	3B	380.51	3.35	13.33	Tiller number	106.1	100.542	111.658	Kumar et al. 2007
QTL389	2B	44.61	3.43	10.32	Grain number per spike	71.35	64.1706	78.5294	Kumar et al. 2007
QTL390	2A	15.8	2.94	4.55	Spikelet number per spike(SPN)	51	37.3267	64.6733	Li et al. 2007
QTL391	5D	15.80-50.60	7.68	70.25	Spikelet number per spike(SPN)	121.3	120.414	122.186	Li et al. 2007
QTL392	3B	NA	3.54	12.42	Grain yield	60.1	55.0908	65.1092	Li et al. 2007
QTL393	3B	0.00-17.90	3.38	10.38	Grain yield	59	53.0064	64.9936	Li et al. 2007
QTL394	2A	0.00-17.90	6.35	20.68	Grain number per spike	51	47.9916	54.0084	Li et al. 2007
QTL395	6A	125.30-138.60	3.2	11.89	Grain number per spike	54.4	49.1676	59.6324	Li et al. 2007
QTL396	2A	125.30-138.60	3.21	5.57	Spike number	52	40.8306	63.1694	Li et al. 2007
QTL397	2D	108.50-111.60	4.47	11.88	Spike number	25.3	20.0632	30.5368	Li et al. 2007
QTL398	3B	333.8	4.54	9.61	Spike number	60.1	53.6261	66.5739	Li et al. 2007
QTL399	4B	62.60-65.00	3.84	14.44	Spike number	42.1	37.7916	46.4084	Li et al. 2007
QTL400	7D	97.3	4.67	40.38	Spike number	110.4	108.859	111.941	Li et al. 2007
QTL401	1A	97.3	2.72	4.42	Spikelet number per spike	49.9	35.8245	63.9755	Li et al. 2007
QTL402	7D	109.1	6.82	43.66	Spikelet number per spike	110.4	108.975	111.825	Li et al. 2007
QTL403	6A	0	5.81	16.82	Thousand kernel weight	112.5	108.801	116.199	Li et al. 2007
QTL404	7D	94.3	5.11	44.15	Thousand kernel weight	110.4	108.991	111.809	Li et al. 2007
QTL405	5D	94.3	4.44	51.79	Spikelet number per spike	121.3	120.099	122.501	Li et al. 2007
QTL406	7D	28.3	6.09	67.63	Spikelet number per spike	125.75	124.83	126.67	Li et al. 2007
QTL407	7D	65.2	5.17	52.25	Spike number	125.75	124.559	126.941	Li et al. 2007
QTL408	1A	65.2	2.81	5.73	Spike number	45.5	34.6425	56.3575	Li et al. 2007
QTL409	2A	51	3.92	15.61	Grain number per spike	50.1	46.1145	54.0855	Li et al. 2007
QTL410	2A	NA	4.19	11.26	Grain number per spike	52.05	46.5248	57.5752	Li et al. 2007
QTL411	1B	129.00-149.90	3.64	44.32	Spikelet number per spike(SPN)	73.8	72.3963	75.2037	Li et al. 2007
QTL412	1D	149.90-176.70	3.61	8.85	Spike number	23.05	16.0202	30.0798	Li et al. 2007
QTL413	1D	22.6	2.94	12.76	Thousand kernel weight	23.05	18.1743	27.9257	Li et al. 2007
QTL414	1D	22.6	2.79	8.6	Grain number per spike	22.25	15.0158	29.4842	Li et al. 2007
QTL415	1D	22.6	4.03	16.88	Thousand kernel weight	26.3	22.6144	29.9856	Li et al. 2007
QTL416	6B	22.60-31.90	5.56	11.72	Spikelet number per spike	30.8	25.4917	36.1083	Li et al. 2007
QTL417	6B	22.60-31.90	3.01	10.99	Spikelet number per spike	39.5	33.8391	45.1609	Li et al. 2007
QTL418	4A	7	4.6	10	Kernel weight	30.7	23.613	37.787	Breseghello and Sorrells, 2007
QTL419	2D	0	9.1	10	Kernel weight	7.8	-6.40792	22.0079	Breseghello and Sorrells, 2007
QTL420	1B	54.1	4.9	10	Grain yield	38.6	30.7154	46.4846	Kuchel et al. 2007
QTL421	2D	175	3.1	10	Grain yield	129.8	121.915	137.685	Kuchel et al. 2007
QTL422	3D	142.9	3.7	10	Grain yield	43.5	35.6154	51.3846	Kuchel et al. 2007
QTL423	4A	25.3	2.3	10	Grain yield	37.9	30.0154	45.7846	Kuchel et al. 2007
QTL424	4D	63.5	3.3	10	Grain yield	84.2	76.3154	92.0846	Kuchel et al. 2007
QTL425	5B	15.1	2.8	10	Grain number	59.4	51.5154	67.2846	Kuchel et al. 2007
QTL426	5B	15.1	2.5	10	Spike number	59.4	51.5154	67.2846	Kuchel et al. 2007
QTL427	6A	67.5	5.6	10	Thousand grain weight	57.6	49.7154	65.4846	Kuchel et al. 2007
QTL428	6D	43	3.1	10	Grain yield	84	76.1154	91.8846	Kuchel et al. 2007
QTL429	7D	91.5	4	10	Thousand grain weight	104.2	96.3154	112.085	Kuchel et al. 2007
QTL430	7D	91.5	2.2	10	Grain number	104.2	96.3154	112.085	Kuchel et al. 2007
QTL431	5B	4	3.3	15.5	Compactness	145.9	142.034	149.766	Ma et al. 2007
QTL432	1B	4.9	3.2	8.9	Spikelet number per spike(SPN)	98.5	91.7667	105.233	Ma et al. 2007
QTL433	5A	5.6	2.8	12	Spikelet number per spike(SPN)	83	78.0061	87.9939	Ma et al. 2007
QTL434	7D	9.4	7.4	26.4	Spikelet number per spike(SPN)	87.5	85.2301	89.7699	Ma et al. 2007
QTL435	5A	0	3.9	13.4	Spike length	61.45	56.9779	65.9221	Ma et al. 2007
QTL436	7A	0	3.2	12.2	Spikelet number per spike(SPN)	63.75	58.838	68.662	Ma et al. 2007
QTL437	7D	1	11.8	36.3	Spike length	76.9	75.2491	78.5509	Ma et al. 2007
QTL438	7D	1	3.5	12.5	Spikelet number per spike(SPN)	76.9	72.1059	81.6941	Ma et al. 2007
QTL439	7D	1	4.3	15.5	Compactness	76.9	73.0338	80.7662	Ma et al. 2007
QTL440	7A	16.8	2.5	10	Spikelet number per spike(SPN)	45.4	39.4074	51.3926	Ma et al. 2007
QTL441	2D	21.6	4.7	20.8	Spikelet number per spike(SPN)	25.3	22.4189	28.1811	Ma et al. 2007
QTL442	5A	5.6	2.9	12.7	Spikelet number per spike(SPN)	87.6	82.8814	92.3186	Ma et al. 2007
QTL443	5A	5.6	2.2	7.9	Compactness	87.6	80.0144	95.1856	Ma et al. 2007
QTL444	4A	22.1	2.7	11.8	Spike length	83.3	78.2215	88.3785	Ma et al. 2007
QTL445	4A	22.1	3.6	18.1	Compactness	83.3	79.9891	86.6109	Ma et al. 2007
QTL446	2D	5.9	5	20	Spike length	5.1	2.10368	8.09632	Ma et al. 2007
QTL447	2D	5.9	5.5	23.2	Compactness	5.1	2.51696	7.68304	Ma et al. 2007
QTL448	5B	14.7	2.2	8.8	Spikelet number per spike(SPN)	112.4	105.59	119.21	Ma et al. 2007
QTL449	5A	0.4	4.1	14.9	Compactness	73.3	69.2781	77.3219	Ma et al. 2007
QTL450	2D	5.7	3.9	15.1	Spikelet number per spike(SPN)	15.8	11.8314	19.7686	Ma et al. 2007
QTL451	5A	13.2	3.8	14.6	Spikelet number per spike(SPN)	78.4	74.2954	82.5046	Ma et al. 2007
QTL452	1A	4.5	4.4	11.3	Spike length	39.6	34.2968	44.9032	Ma et al. 2007
QTL453	1A	4.5	3.8	13.2	Compactness	39.6	35.0601	44.1399	Ma et al. 2007
QTL454	2A	0	4.4051	5.4	Grain weight/plant	9.9	-18.0727	37.8727	Habash et al. 2007
QTL455	2D	99.6	5.6637	7.6	Grain weight/plant	14.1	-5.77535	33.9753	Habash et al. 2007
QTL456	7A	98.8	6.9223	9.2	Grain weight/plant	72.7	56.2812	89.1188	Habash et al. 2007
QTL457	4D	68.8	8.8753	22.4	Grain weight/plant	89.3	82.5566	96.0434	Habash et al. 2007
QTL458	7B	35.9	9.5697	14.2	Grain weight/plant	68.5	57.8625	79.1375	Habash et al. 2007
QTL459	1D	50.3	9.6131	18.3	Grain weight/ear	82.2	73.9458	90.4542	Habash et al. 2007
QTL460	4B	51.7	18.9441	28	Grain weight/ear	16	10.6053	21.3947	Habash et al. 2007
QTL461	7B	35.9	4.3617	4.4	Grain weight/ear	68.5	34.1699	102.83	Habash et al. 2007
QTL462	1A	111.6	5.1646	4.7	Grain weight/ear	114.5	82.3611	146.639	Habash et al. 2007
QTL463	6B	69.1	15.7542	20.5	Grain weight/ear	52.6	45.2316	59.9684	Habash et al. 2007
QTL464	7A	103	10.8934	11.5	Grain weight/ear	73.5	60.365	86.635	Habash et al. 2007
QTL465	3A	14.8	4.34	5.8	Grain weight/ear	28.9	2.85644	54.9436	Habash et al. 2007
QTL466	1B	55.4	7.5516	6.9	Ear number/plant	37.4	15.5083	59.2917	Habash et al. 2007
QTL467	4B	82.2	11.4576	19.8	Ear number/plant	30	22.3711	37.6289	Habash et al. 2007
QTL468	1B	107.4	6.0977	5.3	Ear number/plant	47.7	19.1995	76.2005	Habash et al. 2007
QTL469	6B	69.1	11.7614	11.6	Ear number/plant	52.6	39.5782	65.6218	Habash et al. 2007
QTL470	3D	64.7	5.3599	5.6	Ear number/plant	41.7	14.7263	68.6737	Habash et al. 2007
QTL471	6D	59.5	5.3165	13.5	Grain number/ear	70.7	59.5109	81.8891	Habash et al. 2007
QTL472	4B	62.8	7.4214	6.5	Thousand grain weight	26.7	3.46113	49.9389	Habash et al. 2007
QTL473	2B	125.4	4.7089	4.1	Thousand grain weight	80.8	43.9579	117.642	Habash et al. 2007
QTL474	5A	44.3	5.6637	4.9	Thousand grain weight	51.4	20.5729	82.2271	Habash et al. 2007
QTL475	7D	116.3	6.3581	5.3	Thousand grain weight	97.1	68.5995	125.6	Habash et al. 2007
QTL476	6B	63.9	16.1231	20.5	Thousand grain weight	46.3	38.9316	53.6684	Habash et al. 2007
QTL477	6D	4	7.1827	6.3	Thousand grain weight	6	-17.9766	29.9766	Habash et al. 2007
QTL478	6A	90.2	5.1429	4.2	Thousand grain weight	54.3	18.3351	90.2649	Habash et al. 2007
QTL479	5A	109.3	23.1322	22.5	Time to anthesis	64.16	57.4465	70.8735	Habash et al. 2007
QTL480	2D	35.5	6.2279	9.3	Time to anthesis	2.1	-14.1422	18.3422	Habash et al. 2007
QTL481	7D	3.2	5.208	3	Time to anthesis	87.7	37.3491	138.051	Habash et al. 2007
QTL482	1A	24.7	6.944	4.3	Time to anthesis	29	-6.12852	64.1285	Habash et al. 2007
QTL483	4B	110.8	4.8825	2.8	Time to anthesis	46.3	-7.64737	100.247	Habash et al. 2007
QTL484	5D	165.7	11.6963	17.1	Grain filling duration	47.3	38.4665	56.1335	Habash et al. 2007
QTL485	4D	21.3	4.5787	5.8	Grain filling duration	38	11.9564	64.0436	Habash et al. 2007
QTL486	4B	80	9.7867	14.2	Grain filling duration	35.3	24.6625	45.9375	Habash et al. 2007
QTL487	4D	97.8	4.4051	5.7	Grain filling duration	89.3	62.7995	115.8	Habash et al. 2007
QTL488	1D	64.1	4.6872	9.4	Grain filling duration	56.3	40.2306	72.3694	Habash et al. 2007
QTL489	6A	1	3.01	3.69	Thousand grain weight	19	-6.92593	44.9259	Yang et al. 2007
QTL490	7A	0	4.89	1.7	Thousand grain weight	86.47	30.1955	142.745	Yang et al. 2007
QTL491	2D	0	6.98	5.48	Thousand grain weight	14	-3.45742	31.4574	Yang et al. 2007
QTL492	3A	10	6.72	6.43	Thousand grain weight	21.44	6.56182	36.3182	Yang et al. 2007
QTL493	3A	1	3.08	2.29	Thousand grain weight	72.8	31.0242	114.576	Yang et al. 2007
QTL494	6A	8	3.28	1.77	Thousand grain weight	55.3	1.25104	109.349	Yang et al. 2007
QTL495	1B	10	2.96	2.52	Grain-filling efficiency at the late stage (from 14 DAF to grain maturity)	92.45	54.487	130.413	Yang et al. 2007
QTL496	5A	4	5.77	2.95	Grain-filling efficiency at the late stage (from 15 DAF to grain maturity)	54.55	22.1206	86.9794	Yang et al. 2007
QTL497	5A	8	4.35	5.73	Grain-filling efficiency at the late stage (from 16 DAF to grain maturity)	28.25	11.5542	44.9458	Yang et al. 2007
QTL498	4B	0	10.63	5.28	Grain-filling efficiency at the late stage (from 17 DAF to grain maturity)	28.35	10.2313	46.4687	Yang et al. 2007
QTL499	2A	2	9.62	6.83	Grain-filling efficiency at the late stage (from 18 DAF to grain maturity)	47	32.9932	61.0068	Yang et al. 2007
QTL500	6A	1	2.92	2	Grain-filling efficiency at the late stage (from 19 DAF to grain maturity)	19	-28.8333	66.8333	Yang et al. 2007
QTL501	1B	10	2.96	2.52	Grain-filling efficiency at the early stage (before 14 DAF)	92.45	54.487	130.413	Yang et al. 2007
QTL502	5A	4	5.77	2.95	Grain-filling efficiency at the early stage (before 15 DAF)	54.55	22.1206	86.9794	Yang et al. 2007
QTL503	5A	8	4.35	5.73	Grain-filling efficiency at the early stage (before 16 DAF)	28.25	11.5542	44.9458	Yang et al. 2007
QTL504	4B	0	10.63	5.28	Grain-filling efficiency at the early stage (before 17 DAF)	28.35	10.2313	46.4687	Yang et al. 2007
QTL505	2A	2	9.62	6.83	Grain-filling efficiency at the early stage (before 18 DAF)	47	32.9932	61.0068	Yang et al. 2007
QTL506	6A	1	2.92	2	Grain-filling efficiency at the early stage (before 19 DAF)	19	-28.8333	66.8333	Yang et al. 2007
QTL507	4B	41.1	9.4	33	NTOT(Moul00), GPA(Mons00, Nick00, Moul00,Mons00, Cler01, Cler00, Moul01, Cler01),GY(Moul01), Thousand kernel weight(Cler01, Moul01, Moul00,Mons00, Cler00, Mons01), NS%(Nick00,Moul00), NSA(Cler01)	26.7	24.8956	28.5044	Laperche et al. 2007
QTL508	2A2	79.6	3.6	10	GPC(Cler01, Moul01), GY(Cler01),NS%(Mons00)	55.1	49.1456	61.0544	Laperche et al. 2007
QTL509	3D	91.4	4.2	9.9	GPC(Mons01), GPA(Mons01, Moul00)	45.6	39.5855	51.6145	Laperche et al. 2007
QTL510	3D	120.8	4	7.9	GPA(Cler01), GY(Cler01)	45.6	38.0628	53.1372	Laperche et al. 2007
QTL511	2D	0	4.7	10.2	Thousand kernel weight(Moul01, Cler01, Mons01)	6.6	0.762395	12.4376	Laperche et al. 2007
QTL512	2D	40.5	4.4	13.6	N HI(Moul01), NSA(Mons00, Moul00, Moul01,Mons01), GY(Cler01), NTOT(Mons00),GPA(Cler01, Moul01), GPC(Cler01)	5.1	0.721796	9.4782	Laperche et al. 2007
QTL513	3A	31.7	3.4	5.3	GPA(Cler01)	63.1	51.8654	74.3346	Laperche et al. 2007
QTL514	4B	32.9	5.8	19.8	NS%(Moul01), GPA(Mons01, Moul01),GY(Mons00), GPY(Mons01), Thousand kernel weight(Nick00)	27.6	24.5927	30.6073	Laperche et al. 2007
QTL515	1A	95	7	6.7	Grain number per spike	108.5	103.172	113.828	Cuthbert et al. 2008
QTL516	3B	79.2	7.9	9.6	Grain number per spike	56.1	52.3816	59.8184	Cuthbert et al. 2008
QTL517	5A	0	6	8	Grain number per spike	0	-4.46206	4.46206	Cuthbert et al. 2008
QTL518	5A	154.8	12.5	20.9	Grain number per spike	115.5	113.792	117.208	Cuthbert et al. 2008
QTL519	5B	17.4	4.4	5.8	Grain number per spike	55.9	49.7454	62.0546	Cuthbert et al. 2008
QTL520	5D	15.7	3	2.9	Grain number per spike	43.9	31.5909	56.2091	Cuthbert et al. 2008
QTL521	7B	12.5	3.1	3	Grain number per spike	69.4	57.5012	81.2988	Cuthbert et al. 2008
QTL522	1A	94.9	8.9	8.1	Harvest Index	105.4	100.993	109.807	Cuthbert et al. 2008
QTL523	3A	8.5	7.8	7	Harvest Index	61.7	56.6005	66.7995	Cuthbert et al. 2008
QTL524	3B	75.5	5	4.2	Harvest Index	60.1	51.6008	68.5992	Cuthbert et al. 2008
QTL525	5A	154.8	12.1	11.9	Harvest Index	115.5	112.5	118.5	Cuthbert et al. 2008
QTL526	5B	30.8	9.9	11.2	Harvest Index	54.7	51.5128	57.8872	Cuthbert et al. 2008
QTL527	3B	106.8	10.3	10.2	Spike number	68.7	65.2003	72.1997	Cuthbert et al. 2008
QTL528	5A	0	6.2	7.9	Spike number	0	-4.51855	4.51855	Cuthbert et al. 2008
QTL529	5A	113.5	4.6	4.9	Spike number	69.4	62.115	76.685	Cuthbert et al. 2008
QTL530	5B	12.4	3.3	2.7	Spike number	58.1	44.8791	71.3209	Cuthbert et al. 2008
QTL531	7D	119.3	6.5	6	Spike number	112.7	106.751	118.649	Cuthbert et al. 2008
QTL532	1A	94.9	6.8	7.1	Grain number per spike	105.4	100.372	110.428	Cuthbert et al. 2008
QTL533	2D	79.4	5.1	5.4	Grain number per spike	9.9	3.28953	16.5105	Cuthbert et al. 2008
QTL534	3B	75.5	4.3	4.2	Grain number per spike	60.1	51.6008	68.5992	Cuthbert et al. 2008
QTL535	5A	154.8	8.6	16	Grain number per spike	115.5	113.269	117.731	Cuthbert et al. 2008
QTL536	7A	24	7.4	7.6	Grain number per spike	60.2	55.5031	64.8969	Cuthbert et al. 2008
QTL537	2D	79.4	5.1	4.7	Thousand kernel weight	9.9	2.305	17.495	Cuthbert et al. 2008
QTL538	2D	163.6	5.6	5.5	Thousand kernel weight	28.8	22.3097	35.2903	Cuthbert et al. 2008
QTL539	3B	77.2	7.5	7.6	Thousand kernel weight	59.9	55.2031	64.5969	Cuthbert et al. 2008
QTL540	3B	117.5	5	4.7	Thousand kernel weight	75.1	67.505	82.695	Cuthbert et al. 2008
QTL541	5A	59.9	10.2	10.7	Thousand kernel weight	50.3	46.9639	53.6361	Cuthbert et al. 2008
QTL542	7A	24	3.5	5	Thousand kernel weight	60.2	53.0607	67.3393	Cuthbert et al. 2008
QTL543	1A	95	6.1	6.6	Grain yield	108.5	103.091	113.909	Cuthbert et al. 2008
QTL544	2D	14.1	3.7	4.2	Grain yield	6.6	-1.89917	15.0992	Cuthbert et al. 2008
QTL545	3B	82	3.5	4.4	Grain yield	59	50.8872	67.1128	Cuthbert et al. 2008
QTL546	5A	67.3	5.1	5	Grain yield	55.9	48.7607	63.0393	Cuthbert et al. 2008
QTL547	5A	154.8	12.6	20.4	Grain yield	115.5	113.75	117.25	Cuthbert et al. 2008
QTL548	3B	4	9.6	18.1	Grain yield	15.7	13.8917	17.5083	Maccaferri et al. 2008
QTL549	1A	31.7	1	10	Grain yield	66.34	62.0952	70.5848	Mathews et al. 2008
QTL550	1B	57.5	1.1	10	Grain yield	38.6	34.3552	42.8448	Mathews et al. 2008
QTL551	1B	74.3	5.7	10	Grain yield	39.56	35.3152	43.8048	Mathews et al. 2008
QTL552	1D	46.8	1.3	10	Grain yield	64.61	60.3652	68.8548	Mathews et al. 2008
QTL553	1D	67	1.3	10	Grain yield	74.24	69.9952	78.4848	Mathews et al. 2008
QTL554	2B	24.1	1.4	10	Grain yield	104.61	100.365	108.855	Mathews et al. 2008
QTL555	2D	10.8	1	10	Grain yield	69.1	64.8552	73.3448	Mathews et al. 2008
QTL556	3A	25	1.2	10	Grain yield	37	32.7552	41.2448	Mathews et al. 2008
QTL557	6D	0	1.4	10	Grain yield	31.7	27.4552	35.9448	Mathews et al. 2008
QTL558	3A	17.9	1.5	10	Grain yield	23.36	19.1152	27.6048	Mathews et al. 2008
QTL559	5A	103.4	1.6	10	Grain yield	38.23	33.9852	42.4748	Mathews et al. 2008
QTL560	4B	43.8	1.7	10	Grain yield	24.2	19.9552	28.4448	Mathews et al. 2008
QTL561	3A	22.4	1.8	10	Grain yield	18.83	14.5852	23.0748	Mathews et al. 2008
QTL562	4B	24.4	2.4	10	Grain yield	40.8	36.5552	45.0448	Mathews et al. 2008
QTL563	4B	33.2	2.6	10	Grain yield	36.3	32.0552	40.5448	Mathews et al. 2008
QTL564	6A	6.5	2.6	10	Grain yield	5.86	1.61521	10.1048	Mathews et al. 2008
QTL565	6A	0	2.7	10	Grain yield	33.29	29.0452	37.5348	Mathews et al. 2008
QTL566	4D	2.1	3.8	10	Grain yield	30.2	25.9552	34.4448	Mathews et al. 2008
QTL567	5B	0	1.1	10	Grain yield	9.74	5.49521	13.9848	Mathews et al. 2008
QTL568	6D	6.3	1.2	10	Grain yield	39.48	35.2352	43.7248	Mathews et al. 2008
QTL569	5B	0.3	1.3	10	Grain yield	10.29	6.04521	14.5348	Mathews et al. 2008
QTL570	6A	55.2	1.3	10	Grain yield	34.01	29.7652	38.2548	Mathews et al. 2008
QTL571	5B	30.7	1.9	10	Grain yield	11.85	7.60521	16.0948	Mathews et al. 2008
QTL572	5B	17.5	2	10	Grain yield	61.8	57.5552	66.0448	Mathews et al. 2008
QTL573	5B	20.2	2.1	10	Grain yield	59.4	55.1552	63.6448	Mathews et al. 2008
QTL574	5A	60	2.2	10	Grain yield	39.2	34.9552	43.4448	Mathews et al. 2008
QTL575	4B	44.4	2.5	10	Grain yield	53.72	49.4752	57.9648	Mathews et al. 2008
QTL576	5A	69.7	3.8	10	Grain yield	53.6	49.3552	57.8448	Mathews et al. 2008
QTL577	7A	110	4.2	10	Grain yield	77	72.7552	81.2448	Mathews et al. 2008
QTL578	4A	69.6	1	10	Grain yield	61.5	57.2552	65.7448	Mathews et al. 2008
QTL579	3B	100.1	1.2	10	Grain yield	98.34	94.0952	102.585	Mathews et al. 2008
QTL580	1A	NA	3.3	12.9	Grain weight per ear	39	28.7	49.3	Hai et al. 2008
QTL581	2B	NA	4.2	19.1	Grain weight per ear	7.7	0.743436	14.6566	Hai et al. 2008
QTL582	2D	NA	6.3	16.4	Grain weight per ear	5.1	-3.00185	13.2019	Hai et al. 2008
QTL583	1A	NA	5.8	23.2	Grain number per ear	43.1	37.3728	48.8272	Hai et al. 2008
QTL584	2B	NA	5	17.3	Grain number per ear	7.7	0.0196318	15.3804	Hai et al. 2008
QTL585	2D	NA	4.4	17.6	Grain number per ear	5.1	-2.44945	12.6495	Hai et al. 2008
QTL586	5D	NA	6.7	22.6	Grain number per ear	68.1	62.2208	73.9792	Hai et al. 2008
QTL587	7A	NA	3.6	11.1	Grain number per ear	101.6	89.6297	113.57	Hai et al. 2008
QTL588	7D	NA	3.2	12.3	Grain number per ear	141.1	130.298	151.902	Hai et al. 2008
QTL589	2B	NA	3.2	12.7	Thousand grain weight	75.2	64.7378	85.6622	Hai et al. 2008
QTL590	7B	NA	4.3	10.7	Thousand grain weight	33.1	20.6822	45.5178	Hai et al. 2008
QTL591	1B	NA	9.4	20.7	Biomass	38.4	31.9811	44.8189	Hai et al. 2008
QTL592	5B	NA	6.3	10.7	Biomass	67.2	54.7822	79.6178	Hai et al. 2008
QTL593	5D	NA	3.4	7.6	Biomass	48.2	30.7171	65.6829	Hai et al. 2008
QTL594	7A	NA	8.7	20	Biomass	4.9	-1.74352	11.5435	Hai et al. 2008
QTL595	7D	NA	4.2	13.5	Biomass	100.1	90.2578	109.942	Hai et al. 2008
QTL596	1B	NA	5.5	6.9	Spike weight	38.4	19.1434	57.6566	Hai et al. 2008
QTL597	7A	NA	3.8	12.7	Spike weight	49.1	38.6378	59.5622	Hai et al. 2008
QTL598	7D	NA	5.6	14.4	Spike weight	100.1	90.8729	109.327	Hai et al. 2008
QTL599	4D	89.70-92.30	8.13	29	Spikelet number per head	79.25	75.1264	83.3736	Chu et al. 2008
QTL600	5A	156.80-194.60	8.50	19	Spike length	109.35	103.056	115.644	Chu et al. 2008
QTL601	5A	174.4	5.4	8	Spike compacTiller numberess	112.4	97.4521	127.348	Chu et al. 2008
QTL602	5B	129.1	5.09	13	Spike compacTiller numberess	129.4	120.201	138.599	Chu et al. 2008
QTL603	5A	153.5	16.59	41	Days to heading	77.2	74.2833	80.1167	Chu et al. 2008
QTL604	1A	39.1	3	5	Thousand kernel weight	63.38	45.8531	80.9069	Zhang et al. 2008
QTL605	1A	94.9	8.9	8.1	Hi	105.4	100.993	109.807	Cuthbert et al. 2008
QTL606	1A	94.9	6.8	7.1	Sns (3.03)	105.4	100.372	110.428	Cuthbert et al. 2008
QTL607	1A	95	7	6.7	Asw (3.18)	108.5	103.172	113.828	Cuthbert et al. 2008
QTL608	1A	95	6.1	6.6	Yld (3.00)	108.5	103.091	113.909	Cuthbert et al. 2008
QTL609	1B	13.1	3.2	2.8	Mat (2.50)	38.8	26.0512	51.5488	Cuthbert et al. 2008
QTL610	1B	13.1	5.2	4.5	Hdg (3.09)	38.8	30.8674	46.7326	Cuthbert et al. 2008
QTL611	2D	84	3.7	4.2	Yld (3.00)	6.6	-1.89917	15.0992	Cuthbert et al. 2008
QTL612	2D	84	3.4	3.9	Gft (3.11)	6.6	-2.55295	15.753	Cuthbert et al. 2008
QTL613	2D	163.6	5.6	5.5	Thousand grain weight (3.30)	28.8	22.3097	35.2903	Cuthbert et al. 2008
QTL614	2D	79.4	5.1	5.4	Sns (3.03)	9.9	3.28953	16.5105	Cuthbert et al. 2008
QTL615	2D	79.4	5.1	4.7	Thousand grain weight (3.30)	9.9	2.305	17.495	Cuthbert et al. 2008
QTL616	2D	79.4	8.2	7	Hdg (3.09)	9.9	4.8005	14.9995	Cuthbert et al. 2008
QTL617	3A	12.4	10.6	9.5	Hdg (3.09)	57.4	53.6425	61.1575	Cuthbert et al. 2008
QTL618	3A	8.5	7.8	7	Hi (3.08)	61.7	56.6005	66.7995	Cuthbert et al. 2008
QTL619	3A	8.5	4.8	5.3	Gft (3.11)	61.7	54.9648	68.4352	Cuthbert et al. 2008
QTL620	3B	75.5	5	4.2	Hi (3.08)	60.1	51.6008	68.5992	Cuthbert et al. 2008
QTL621	3B	75.5	4.3	4.2	Sns (3.03)	60.1	51.6008	68.5992	Cuthbert et al. 2008
QTL622	3B	117.5	5	4.7	Thousand grain weight (3.30)	75.1	67.505	82.695	Cuthbert et al. 2008
QTL623	3B	106.8	10.3	10.2	Sm2 (3.01)	68.7	65.2003	72.1997	Cuthbert et al. 2008
QTL624	3B	79.2	7.9	9.6	Asw (3.18)	56.1	52.3816	59.8184	Cuthbert et al. 2008
QTL625	3B	77.2	7.5	7.6	Thousand grain weight (3.30)	59.9	55.2031	64.5969	Cuthbert et al. 2008
QTL626	3B	82	4.5	4.1	Yld (3.00)	59	50.2935	67.7065	Cuthbert et al. 2008
QTL627	3B	96.5	5.1	4.5	Mat (2.50)	61.2	53.2674	69.1326	Cuthbert et al. 2008
QTL628	5A	0	6	8	Asw (3.18)	0	-4.46206	4.46206	Cuthbert et al. 2008
QTL629	5A	0	6.2	7.9	Sm2 (3.01)	0	-4.51855	4.51855	Cuthbert et al. 2008
QTL630	5A	113.5	4.6	4.9	Sm2 (3.01)	69.4	62.115	76.685	Cuthbert et al. 2008
QTL631	5A	113.5	5.8	5.5	Mat (2.50)	69.4	62.9097	75.8903	Cuthbert et al. 2008
QTL632	5A	59.2	4.6	5.1	Gft (3.11)	46.5	39.5007	53.4993	Cuthbert et al. 2008
QTL633	5A	59.9	10.2	10.7	Thousand grain weight (3.30)	50.3	46.9639	53.6361	Cuthbert et al. 2008
QTL634	5A	154.8	12.5	20.9	Asw (3.18)	115.5	113.792	117.208	Cuthbert et al. 2008
QTL635	5A	154.8	12.1	11.9	Hi (3.08)	115.5	112.5	118.5	Cuthbert et al. 2008
QTL636	5A	154.8	8.6	16	Sns (3.03)	115.5	113.269	117.731	Cuthbert et al. 2008
QTL637	5A	154.8	12.6	20.4	Yld (3.00)	115.5	113.75	117.25	Cuthbert et al. 2008
QTL638	5A	154.8	13.7	14.6	Hdg (3.09)	115.5	113.055	117.945	Cuthbert et al. 2008
QTL639	5A	67.3	5.1	5	Yld (3.00)	55.9	48.7607	63.0393	Cuthbert et al. 2008
QTL640	5B	30.8	9.9	11.2	Hi (3.08)	54.7	51.5128	57.8872	Cuthbert et al. 2008
QTL641	5B	30.8	4.9	5.4	Gft (3.11)	54.7	48.0895	61.3105	Cuthbert et al. 2008
QTL642	5B	29.2	3.3	2.7	Sm2 (3.01)	58.1	44.8791	71.3209	Cuthbert et al. 2008
QTL643	5B	15.4	11.6	11.8	Mat (2.50)	39.3	36.2749	42.3251	Cuthbert et al. 2008
QTL644	5B	32	4.4	5.8	Asw (3.18)	55.9	49.7454	62.0546	Cuthbert et al. 2008
QTL645	5D	31.5	3	2.9	Asw (3.18)	43.9	31.5909	56.2091	Cuthbert et al. 2008
QTL646	6B	33.1	14.9	16.8	Mat (2.50)	51.3	49.1752	53.4248	Cuthbert et al. 2008
QTL647	6B	33.1	8.5	7.3	Hdg (3.09)	51.3	46.4101	56.1899	Cuthbert et al. 2008
QTL648	7A	79.5	2.6	2.8	Mat (2.50)	85	72.2512	97.7488	Cuthbert et al. 2008
QTL649	7A	64.5	7.4	7.6	Sns (3.03)	60.2	55.5031	64.8969	Cuthbert et al. 2008
QTL650	7A	64.5	3.5	5	Thousand grain weight (3.30)	60.2	53.0607	67.3393	Cuthbert et al. 2008
QTL651	7B	24.8	9.5	11.9	Mat (2.50)	89.6	86.6003	92.5997	Cuthbert et al. 2008
QTL652	7B	12.5	3.1	3	Asw (3.18)	69.4	57.5012	81.2988	Cuthbert et al. 2008
QTL653	7B	31.2	6.3	7.2	Gft (3.11)	88.4	83.4422	93.3578	Cuthbert et al. 2008
QTL654	7B	2.2	3.3	3.1	Hdg (3.09)	60.5	48.985	72.015	Cuthbert et al. 2008
QTL655	7D	101.2	5.9	5.8	Hdg (3.09)	76.9	70.7454	83.0546	Cuthbert et al. 2008
QTL656	7D	99.1	6.5	6	Sm2 (3.01)	112.7	106.751	118.649	Cuthbert et al. 2008
QTL657	7D	94.1	3.6	3.5	Mat (2.50)	76.9	66.701	87.099	Cuthbert et al. 2008
QTL658	1B	NA	3	10	Thousand grain weight	38.5	25.5635	51.4365	Pshenichnikova et al. 2008
QTL659	2D	NA	3	10	Thousand grain weight	5.1	-7.83651	18.0365	Pshenichnikova et al. 2008
QTL660	1A3	15.1	2.66	33.79	Thousand-grain weight	39	29.7735	48.2265	Liao et al. 2008
QTL661	1A3	0.00-15.10	4.65	21.39	Thousand-grain weight	42.1	27.5247	56.6753	Liao et al. 2008
QTL662	2D	NA	4.01	31.82	Thousand-grain weight	32.65	22.8522	42.4478	Liao et al. 2008
QTL663	3D2	11.5	2.86	20.5	Thousand-grain weight	45.6	30.392	60.808	Liao et al. 2008
QTL664	4B	36.1	10.95	24.11	Spike number per plant	24.2	11.2691	37.1309	Liao et al. 2008
QTL665	4B	25.60-28.00	2.84	10.9	Thousand-grain weight	29.3	0.697733	57.9023	Liao et al. 2008
QTL666	4B	16.60-25.60	2.63	30.21	Thousand-grain weight	29.65	19.3301	39.9699	Liao et al. 2008
QTL667	7B	60.9	2.58	1.97	Spike number per plant	33.1	-125.156	191.356	Liao et al. 2008
QTL668	1A	0	2.58	6.3	Thousand grain weight	19	9.88978	28.1102	Wang et al. 2009
QTL669	1A	0	5.11	14.16	Grain weight per ear	19	14.9467	23.0533	Wang et al. 2009
QTL670	1A	0	4.3	13.38	GFRmean GFRmax	19	14.7104	23.2896	Wang et al. 2009
QTL671	1A	0	3.09	8.3	GFRmean GFRmax	19	12.085	25.915	Wang et al. 2009
QTL672	1A	0	2.82	10.31	Grain filling duration	19	13.4331	24.5669	Wang et al. 2009
QTL673	1B	8.40-11.30	4.04	10.45	Grain filling rate	39	33.5077	44.4923	Wang et al. 2009
QTL674	1B	29.7	4.25	15.77	Flowering date	27.55	23.9105	31.1895	Wang et al. 2009
QTL675	1B	17.8	3.49	10.77	Days to maturity	12.5	7.1709	17.8291	Wang et al. 2009
QTL676	1B	17.8	4.75	11.63	Flowering date	12.5	7.56497	17.435	Wang et al. 2009
QTL677	1B	11.30-13.50	4.73	13.96	Thousand grain weight	38.35	34.2387	42.4613	Wang et al. 2009
QTL678	1B	11.30-13.50	3.1	10.48	GFRmean GFRmax	38.35	32.8734	43.8266	Wang et al. 2009
QTL679	1B	13.50-17.80	3.51	6.23	Thousand grain weight	31.8	22.5874	41.0126	Wang et al. 2009
QTL680	1B	13.50-17.80	5.57	15.99	GFRmean GFRmax	31.8	28.2106	35.3894	Wang et al. 2009
QTL681	1B	13.50-17.80	3.95	10.66	GFRmean GFRmax	31.8	26.4159	37.1841	Wang et al. 2009
QTL682	1B	0.00-8.40	5.74	13.96	Thousand grain weight	38.75	34.6387	42.8613	Wang et al. 2009
QTL683	1B	0.00-8.40	5.33	10.65	GFRmean GFRmax	38.75	33.3609	44.1391	Wang et al. 2009
QTL684	2A	17.5	3.3	13.62	Thousand grain weight	0.62	-3.59398	4.83398	Wang et al. 2009
QTL685	2A	17.5	6.67	16.8	Thousand grain weight	10.35	6.93367	13.7663	Wang et al. 2009
QTL686	2A	17.50-38.00	2.47	6.46	GFRmean GFRmax	25.5	16.6154	34.3846	Wang et al. 2009
QTL687	2A	17.50-24.50	3.21	8.4	Days to maturity	18.95	12.1173	25.7827	Wang et al. 2009
QTL688	2A	17.50-26.50	3.56	9.77	Grain filling rate	13.8	7.92545	19.6746	Wang et al. 2009
QTL689	2A	17.50-26.50	3.23	8.9	Grain filling rate	13.8	7.35119	20.2488	Wang et al. 2009
QTL690	2A	38	3.33	7.39	Thousand grain weight	15.15	7.38351	22.9165	Wang et al. 2009
QTL691	2A	38	3.08	7.52	Grain filling rate	15.15	7.51777	22.7822	Wang et al. 2009
QTL692	2A	24.5	3.67	9.14	Thousand grain weight	8.6	2.32053	14.8795	Wang et al. 2009
QTL693	2A	26.50-38.00	3.23	7.24	Grain filling rate	18.6	10.6726	26.5274	Wang et al. 2009
QTL694	2A	26.50-38.00	2.55	7.46	Grain filling rate	18.6	10.9064	26.2936	Wang et al. 2009
QTL695	2A	26.50-55.90	3.1	7.3	Grain weight per ear	18.7	10.8378	26.5622	Wang et al. 2009
QTL696	2A	100.80-110.50	3.57	8.95	Grain number per ear	49.4	42.9872	55.8128	Wang et al. 2009
QTL697	2A	100.80-110.50	3.33	6.76	Grain weight per ear	49.4	40.9097	57.8903	Wang et al. 2009
QTL698	2B	65.1	2.44	8.28	Days to maturity	36.05	29.1183	42.9817	Wang et al. 2009
QTL699	2B	16.30-31.50	3.21	7.65	Flowering date	49.45	41.9475	56.9525	Wang et al. 2009
QTL700	2D	NA	4.34	7.96	Thousand grain weight	12.75	5.53965	19.9603	Wang et al. 2009
QTL701	2D	55.20-86.50	2.95	13.16	GFRmean GFRmax	4.5	0.138726	8.86127	Wang et al. 2009
QTL702	2D	NA	2.89	7.13	Grain number per ear	9.45	1.4003	17.4997	Wang et al. 2009
QTL703	2D	29.6	2.89	11.34	Grain number per ear	3.3	-1.76123	8.36123	Wang et al. 2009
QTL704	3A	11.50-24.30	3.25	15.82	Grain number per ear	62.2	58.572	65.828	Wang et al. 2009
QTL705	3A	11.50-24.30	5.36	10.9	Grain filling rate	62.2	56.9345	67.4655	Wang et al. 2009
QTL706	3B	NA	5.4	14.16	Grain filling rate	33.15	29.0967	37.2033	Wang et al. 2009
QTL707	3B	NA	2.69	5.75	Thousand grain weight	63.1	53.1184	73.0816	Wang et al. 2009
QTL708	3B	NA	2.75	6.71	Grain filling rate	63.1	54.5464	71.6536	Wang et al. 2009
QTL709	3B	29.9	2.76	5.8	Thousand grain weight	6	-3.89558	15.8956	Wang et al. 2009
QTL710	3B	29.9	6.24	20.83	Grain filling rate	6	3.24463	8.75537	Wang et al. 2009
QTL711	3B	29.9	4.36	15.95	Grain filling rate	6	2.40161	9.59839	Wang et al. 2009
QTL712	3B	29.9	4.56	15.72	Grain filling duration	6	2.34896	9.65104	Wang et al. 2009
QTL713	3B	29.9	3.32	12.09	Flowering date	6	1.25274	10.7473	Wang et al. 2009
QTL714	3B	NA	3.12	5.57	Thousand grain weight	29.95	19.6458	40.2542	Wang et al. 2009
QTL715	3B	NA	8.35	24.06	Grain weight per ear	59.9	57.5145	62.2855	Wang et al. 2009
QTL716	3D	64.3	3.07	8.74	Days to maturity	31.75	25.1831	38.3169	Wang et al. 2009
QTL717	3D	101.7	2.65	7.17	Grain filling rate	19.35	11.3452	27.3548	Wang et al. 2009
QTL718	4A	6.4	3.45	6.28	Thousand grain weight	13.5	4.36077	22.6392	Wang et al. 2009
QTL719	4B	49.8	2.54	7.14	Days to maturity	14.65	6.61157	22.6884	Wang et al. 2009
QTL720	4B	50.60-51.40	3.29	10.04	Grain weight per ear	25.75	20.0334	31.4666	Wang et al. 2009
QTL721	4D	12.4	2.6	4.36	Thousand grain weight	16.55	3.38615	29.7138	Wang et al. 2009
QTL722	4D	12.4	2.58	7.43	Grain number per ear	16.55	8.82532	24.2747	Wang et al. 2009
QTL723	4D	12.4	4.65	12.33	Grain weight per ear	16.55	11.8951	21.2049	Wang et al. 2009
QTL724	4D	12.4	2.96	8.94	Grain filling rate	16.55	10.13	22.97	Wang et al. 2009
QTL725	4D	12.4	3.35	11.52	Grain filling rate	16.55	11.5679	21.5321	Wang et al. 2009
QTL726	5A	6.10-17.20	3.91	8.45	Thousand grain weight	46.55	39.7578	53.3422	Wang et al. 2009
QTL727	5A	21	3.29	8.56	Thousand grain weight	27.95	21.2451	34.6549	Wang et al. 2009
QTL728	5B	81.8	2.55	9.46	Grain filling rate	65.95	59.8829	72.0171	Wang et al. 2009
QTL729	5B	25.5	3.96	9.77	Grain filling rate	41.65	35.7754	47.5246	Wang et al. 2009
QTL730	5D	18.30-42.90	2.46	10.77	Flowering date	77.7	72.3709	83.0291	Wang et al. 2009
QTL731	5D	0	2.64	7.82	Grain fill duration	23.65	16.3106	30.9894	Wang et al. 2009
QTL732	6B	17.9	2.73	5.93	Grain weight per ear	31.85	22.1714	41.5286	Wang et al. 2009
QTL733	6D	79.8	5.19	10.9	Thousand grain weight	32.35	27.0845	37.6155	Wang et al. 2009
QTL734	6D	79.80-86.10	4.97	11.76	Grain filling rate	68.2	63.3195	73.0805	Wang et al. 2009
QTL735	6D	27.10-36.10	3.36	10.77	Grain weight per ear	41.05	35.7209	46.3791	Wang et al. 2009
QTL736	6D	27.10-36.10	4.54	12.54	Grain filling rate	41.05	36.4731	45.6269	Wang et al. 2009
QTL737	6D	13.00-27.10	3.66	8.7	Grain filling duration	33.6	27.0029	40.1971	Wang et al. 2009
QTL738	6D	13.00-27.10	2.72	8.18	Flowering date	33.6	26.5836	40.6164	Wang et al. 2009
QTL739	7D	11.80-21.80	3.85	10.18	Grain filling rate	104.25	98.612	109.888	Wang et al. 2009
QTL740	7D	0.00-11.80	2.61	9.8	Thousand grain weight	99.1	93.2434	104.957	Wang et al. 2009
QTL741	1A	NA	3.84	9	Ear number per plant	42.1	28.813	55.387	Su et al. 2009
QTL742	1A	NA	2.11	4.5	Ear number per plant	83.3	56.7259	109.874	Su et al. 2009
QTL743	1A	NA	2.32	5.4	biomass yield per plant	37.85	15.7049	59.9951	Su et al. 2009
QTL744	1A	NA	3.36	8.3	Grain number per ear	37.85	23.4424	52.2576	Su et al. 2009
QTL745	1A	NA	4.24	10.9	biomass yield per plant	66.6	55.6291	77.5709	Su et al. 2009
QTL746	1A	NA	2.44	5.2	Grain number per ear	52.8	29.8032	75.7968	Su et al. 2009
QTL747	1B	NA	3.03	7.6	Tiller number	24	8.26535	39.7346	Su et al. 2009
QTL748	1B	NA	3.45	10	Grain number per ear	99.7	87.7417	111.658	Su et al. 2009
QTL749	1B	NA	4.55	10.4	Tiller number	38.5	27.0016	49.9984	Su et al. 2009
QTL750	1B	NA	6.65	15.5	Tiller number	38.1	30.3849	45.8151	Su et al. 2009
QTL751	1B	NA	6.83	16.2	Tiller number	38.1	30.7183	45.4817	Su et al. 2009
QTL752	1D	NA	3.3	8.4	Ear number per plant	37.65	23.4139	51.8861	Su et al. 2009
QTL753	2A	NA	2.58	4.7	Thousand grain weight	52.55	27.1067	77.9933	Su et al. 2009
QTL754	2A	NA	2.37	5	Ear number per plant	52	28.0833	75.9167	Su et al. 2009
QTL755	2B	NA	3.06	7.6	Ear number per plant	76.35	60.6154	92.0846	Su et al. 2009
QTL756	2B	NA	2.29	5.7	Tiller number	88.8	67.8205	109.78	Su et al. 2009
QTL757	2B	NA	2.3	4.9	biomass yield per plant	72.5	48.0952	96.9048	Su et al. 2009
QTL758	2D	NA	3.41	8.2	biomass yield per plant	16.9	2.31667	31.4833	Su et al. 2009
QTL759	2D	NA	3.68	11.7	biomass yield per plant	10.225	0.00420228	20.4458	Su et al. 2009
QTL760	2D	NA	2.72	7.8	Thousand grain weight	10.225	-5.1062	25.5562	Su et al. 2009
QTL761	2D	NA	7.46	17.9	Tiller number	15.8	9.11937	22.4806	Su et al. 2009
QTL762	2D	NA	4.61	9.8	Thousand grain weight	15.8	3.59762	28.0024	Su et al. 2009
QTL763	2D	NA	12.72	34	Tiller number	14	10.4828	17.5172	Su et al. 2009
QTL764	2D	NA	4.7	13.9	biomass yield per plant	6.95	-1.65312	15.5531	Su et al. 2009
QTL765	2D	NA	3.54	12.8	Grain number per ear	6.95	-2.39245	16.2924	Su et al. 2009
QTL766	2D	NA	4.05	11.4	Thousand grain weight	6.95	-3.53977	17.4398	Su et al. 2009
QTL767	3A	NA	2.31	4.7	Thousand grain weight	72.8	47.3567	98.2433	Su et al. 2009
QTL768	3B	NA	6.28	19	biomass yield per plant	74.8	68.5061	81.0939	Su et al. 2009
QTL769	3B	NA	3.14	8	biomass yield per plant	60	45.0521	74.9479	Su et al. 2009
QTL770	3B	NA	2.28	5.3	biomass yield per plant	107.5	84.9371	130.063	Su et al. 2009
QTL771	3B	NA	4.56	10.9	Ear number per plant	68.7	57.7291	79.6709	Su et al. 2009
QTL772	3B	NA	9.24	23.3	Ear number per plant	68.7	63.5677	73.8323	Su et al. 2009
QTL773	3B	NA	3.54	9.1	Ear number per plant	68.7	55.559	81.841	Su et al. 2009
QTL774	3D	NA	2.34	6.7	biomass yield per plant	63.5	45.6517	81.3483	Su et al. 2009
QTL775	3D	NA	2.51	5.6	Tiller number	52.3	30.9458	73.6542	Su et al. 2009
QTL776	4B	NA	2.56	7.1	biomass yield per plant	31.8	14.9573	48.6427	Su et al. 2009
QTL777	4B	NA	2.97	7.6	Grain number per ear	31.8	16.0654	47.5346	Su et al. 2009
QTL778	4B	NA	2.11	3.8	Thousand grain weight	24.3	-7.1693	55.7693	Su et al. 2009
QTL779	4B	NA	2.45	5.3	Tiller number	44.1	21.5371	66.6629	Su et al. 2009
QTL780	4D	NA	2.11	5.7	Grain number per ear	34.6	13.6205	55.5795	Su et al. 2009
QTL781	5A	NA	8.01	25.8	Tiller number	139.55	134.915	144.185	Su et al. 2009
QTL782	5A	NA	5.39	14.8	biomass yield per plant	49.6	41.52	57.68	Su et al. 2009
QTL783	5A	NA	3.54	7.9	Ear number per plant	49.6	34.4629	64.7371	Su et al. 2009
QTL784	5A	NA	4.88	11	Grain number per ear	51.4	40.5288	62.2712	Su et al. 2009
QTL785	5A	NA	2.01	6.1	Ear number per plant	124.75	105.146	144.354	Su et al. 2009
QTL786	5A	NA	3.75	10.7	Tiller number	124.75	113.574	135.926	Su et al. 2009
QTL787	5B	NA	3.79	8.9	Thousand grain weight	65.1	51.6637	78.5363	Su et al. 2009
QTL788	5D	NA	2.03	5.4	Ear number per plant	19.05	-3.09506	41.1951	Su et al. 2009
QTL789	6A	NA	3.31	7.3	Tiller number	19	2.61872	35.3813	Su et al. 2009
QTL790	6A	NA	3.19	7.8	Grain number per ear	69.4	54.0688	84.7312	Su et al. 2009
QTL791	6A	NA	2.1	6.3	Tiller number	55.3	36.3185	74.2815	Su et al. 2009
QTL792	6A	NA	5.65	17.5	Thousand grain weight	55.3	48.4667	62.1333	Su et al. 2009
QTL793	6A	NA	3.13	8.8	Tiller number	61.5	47.911	75.089	Su et al. 2009
QTL794	6A	NA	5.46	13.8	Thousand grain weight	61.5	52.8345	70.1655	Su et al. 2009
QTL795	6B	NA	2.79	11.1	Grain number per ear	58.24	47.4667	69.0133	Su et al. 2009
QTL796	6B	NA	4.34	9.4	Thousand grain weight	35.74	23.0184	48.4616	Su et al. 2009
QTL797	6B	NA	5.33	12.9	Thousand grain weight	35.74	26.47	45.01	Su et al. 2009
QTL798	6B	NA	4.19	8.6	Thousand grain weight	35.74	21.835	49.645	Su et al. 2009
QTL799	6B	NA	3.47	8.5	Grain number per ear	70.2	56.1314	84.2686	Su et al. 2009
QTL800	6B	NA	3.1	5.7	Thousand grain weight	42.85	21.8705	63.8295	Su et al. 2009
QTL801	6D	NA	2.39	6.7	Grain number per ear	66.2	48.3517	84.0483	Su et al. 2009
QTL802	7A	NA	7.28	17	Grain number per ear	86.47	79.4357	93.5043	Su et al. 2009
QTL803	7A	NA	4.08	10.3	Thousand grain weight	86.47	74.86	98.08	Su et al. 2009
QTL804	7A	NA	3.21	8.1	Ear number per plant	86.66	71.8966	101.423	Su et al. 2009
QTL805	7A	NA	2.34	5.1	Thousand grain weight	73.5	50.0523	96.9477	Su et al. 2009
QTL806	7A	NA	3.12	8.8	Ear number per plant	55.4	41.811	68.989	Su et al. 2009
QTL807	7A	NA	5.45	14.2	Thousand grain weight	55.4	46.9786	63.8214	Su et al. 2009
QTL808	7B	NA	2.01	4.3	Grain number per ear	33.1	5.28992	60.9101	Su et al. 2009
QTL809	7B	NA	2.33	4.2	Tiller number	136.9	108.428	165.372	Su et al. 2009
QTL810	7D	NA	2.05	4.2	Tiller number	40.745	12.2728	69.2172	Su et al. 2009
QTL811	7D	NA	4.67	13.2	biomass yield per plant	40.745	31.6857	49.8043	Su et al. 2009
QTL812	1D	17	2.94	13.1	Thousand kernel weight	26.3	21.5509	31.0491	Sun et al. 2009
QTL813	2A	6	5.2	19.4	Kernel weight	52	48.7931	55.2069	Sun et al. 2009
QTL814	6A	0	4.55	13.2	Thousand kernel weight	112.5	107.787	117.213	Sun et al. 2009
QTL815	2A	6	4.41	20.1	Thousand kernel weight	103.9	100.805	106.995	Sun et al. 2009
QTL816	5D	0.00-11.50	4.7	8.1	Number of spikes per plant	3.4	-0.792387	7.59239	Zhang et al. 2009
QTL817	7A	NA	3.9	6	Thousand kernel weight	68.6	62.9403	74.2597	Zhang et al. 2009
QTL818	5D	NA	3.8	4.6	Thousand kernel weight	46.45	39.0678	53.8322	Zhang et al. 2009
QTL819	1B	9.3	4.9	9.4	Number of spikes per plant	39.9	36.2874	43.5126	Zhang et al. 2009
QTL820	6B	78.10-82.30	2.99	5	Thousand kernel weight	63.27	48.1647	78.3753	Raman et al. 2009
QTL821	7A2	0.00-3.30	3.12	6	Thousand kernel weight	101.4	88.8123	113.988	Raman et al. 2009
QTL822	7A2	3.3	7.53	13	Thousand kernel weight	101.2	95.3903	107.01	Raman et al. 2009
QTL823	6B	65.9	3.58	8	Thousand kernel weight	75.2	65.7592	84.6408	Raman et al. 2009
QTL824	2B	37.1	2.45	12.7	Grain number per spike	14.9	1.08136	28.7186	Golabadi et al. 2010
QTL825	2B	37.1	2.25	11.48	Harvest Index	14.9	-0.387168	30.1872	Golabadi et al. 2010
QTL826	2B	37.1	2.2	8.74	Spike harvest index	14.9	-5.17971	34.9797	Golabadi et al. 2010
QTL827	2B	4.1	2.13	7.4	Grain number per spike	3.7	-20.0158	27.4158	Golabadi et al. 2010
QTL828	2B	4.1	2.36	9.1	Spike number	3.7	-15.5854	22.9854	Golabadi et al. 2010
QTL829	7B	10.1	3.23	11.77	Thousand grain weight	89.6	74.6895	104.511	Golabadi et al. 2010
QTL830	1B	14.1	3.16	10.26	Spike number	38.6	21.4951	55.7049	Golabadi et al. 2010
QTL831	1B	14.1	3.16	10.26	Spike number	38.6	21.4951	55.7049	Golabadi et al. 2010
QTL832	1B	14.1	2.25	8.62	Spike weight	38.6	18.2408	58.9592	Golabadi et al. 2010
QTL833	3B	26	2.2	10.89	Thousand grain weight	7	-9.1154	23.1154	Golabadi et al. 2010
QTL834	5B	0.1	2.95	6.47	Grain weight per spike	112.4	85.2753	139.525	Golabadi et al. 2010
QTL835	5B	0.1	2.45	7.92	Harvest Index	112.4	90.2413	134.559	Golabadi et al. 2010
QTL836	3B	148.8	2.2	8.74	Harvest Index	118.8	98.7203	138.88	Golabadi et al. 2010
QTL837	5B	23.1	2.76	6.53	Harvest Index	118.1	91.2245	144.975	Golabadi et al. 2010
QTL838	1B	89.03	3.9545	7.3	Harvest Index	38.4	32.5852	44.2148	McIntyre et al. 2010
QTL839	1D	46.8	3.19285	4.9	Grain weight	64.61	55.9472	73.2728	McIntyre et al. 2010
QTL840	2B	59.67	3.36424	4.1	Thousand kernel weight	92.96	82.6068	103.313	McIntyre et al. 2010
QTL841	4A	97.78	3.19861	5.7	Spike number	133.89	126.443	141.337	McIntyre et al. 2010
QTL842	4B	43.85	4.26291	4.3	Spike number	24.2	14.3284	34.0716	McIntyre et al. 2010
QTL843	4D	2.05	3.04941	4.1	Thousand kernel weight	30.2	19.8468	40.5532	McIntyre et al. 2010
QTL844	4D	2.05	4.29902	7.2	Harvest Index	30.2	24.3045	36.0955	McIntyre et al. 2010
QTL845	4D	2.05	6.54598	4.5	Spike number	30.2	20.7671	39.6329	McIntyre et al. 2010
QTL846	4D	0	4.24833	7.4	Grain weight	33.1	27.3638	38.8362	McIntyre et al. 2010
QTL847	5A	103.43	3.009	5.4	Harvest Index	38.23	30.3693	46.0907	McIntyre et al. 2010
QTL848	6A	55.24	4.16204	6.5	Grain weight	34.01	27.4796	40.5404	McIntyre et al. 2010
QTL849	6A	55.24	3.53933	6.9	Grain number	34.01	27.8581	40.1619	McIntyre et al. 2010
QTL850	6B	109.82	5.2862	8.7	Harvest Index	37.75	32.8709	42.6291	McIntyre et al. 2010
QTL851	6D	0	3.70104	2.4	Grain yield	203	185.313	220.687	McIntyre et al. 2010
QTL852	6D	6.32	3.57602	3.2	Grain yield	39.48	26.215	52.745	McIntyre et al. 2010
QTL853	7A	110.04	3.97407	7.2	Grain yield	86.53	80.6345	92.4255	McIntyre et al. 2010
QTL854	7A	110.04	3.66161	3.6	Harvest Index	86.53	74.7389	98.3211	McIntyre et al. 2010
QTL855	7A	110.04	3.27	5.6	Grain number	77	69.42	84.58	McIntyre et al. 2010
QTL856	1B	90.16	3	10.5	Yield	22.65	18.0022	27.2978	Pinto et al. 2010
QTL857	3B	120.09	3	15.1	Yield	98.34	95.1081	101.572	Pinto et al. 2010
QTL858	4A	48.85	3	3.1	Yield	65.06	49.3173	80.8027	Pinto et al. 2010
QTL859	3B	129.23	3	4.4	Grain number	121.85	110.759	132.941	Pinto et al. 2010
QTL860	5B	6.29	3	5.7	Grain number	10.29	1.72818	18.8518	Pinto et al. 2010
QTL861	2B	18	4.3	12.06	Thousand kernel weight	66.9	63.2471	70.5529	Ramya et al. 2010
QTL862	1A	27	2.8	5.68	Thousand kernel weight	38.2	30.444	45.956	Ramya et al. 2010
QTL863	1D	0	2	4.42	Kernel weight	13.7	3.73302	23.667	Ramya et al. 2010
QTL864	6B	50	2.7	5.71	Thousand kernel weight	65.7	57.9848	73.4152	Ramya et al. 2010
QTL865	2B	4	2.5	8.43	Thousand kernel weight	68.7	63.4741	73.9259	Ramya et al. 2010
QTL866	2B	4	3.7	11.54	Kernel weight	68.7	64.8825	72.5175	Ramya et al. 2010
QTL867	1A	35	2.7	5.39	Thousand kernel weight	45.9	37.7267	54.0733	Ramya et al. 2010
QTL868	2B	8	7.4	15.53	Thousand kernel weight	71.5	68.6633	74.3367	Ramya et al. 2010
QTL869	2B	27	2	5.55	Kernel weight	67.4	59.4623	75.3377	Ramya et al. 2010
QTL870	5B	45	2.6	6.66	Kernel weight	63.7	57.0853	70.3147	Ramya et al. 2010
QTL871	2D	79	3	5.97	Kernel weight	18.9	11.5208	26.2792	Ramya et al. 2010
QTL872	5D	0	2.3	4.86	Kernel weight	3.4	-5.66462	12.4646	Ramya et al. 2010
QTL873	2D	83	2.7	5.37	Thousand kernel weight	19.7	11.4963	27.9037	Ramya et al. 2010
QTL874	5B	14	2.8	8.24	Thousand kernel weight	0	-5.34637	5.34637	Ramya et al. 2010
QTL875	2D	8	2.2	7.07	Kernel weight	6.6	0.368875	12.8311	Ramya et al. 2010
QTL876	1D	42	2	4.15	Thousand kernel weight	48.4	37.7846	59.0154	Ramya et al. 2010
QTL877	4D	48	3.2	7.3	Thousand kernel weight	30.2	24.1652	36.2348	Ramya et al. 2010
QTL878	4D	48	2.9	6.62	Kernel weight	30.2	23.5453	36.8547	Ramya et al. 2010
QTL879	5B	58	2	4.41	Thousand kernel weight	63.7	53.7104	73.6896	Ramya et al. 2010
QTL880	5B	58	3.7	7.41	Kernel weight	63.7	57.7548	69.6452	Ramya et al. 2010
QTL881	2A	110	2.3	5.19	Kernel weight	127.5	119.012	135.988	Ramya et al. 2010
QTL882	2D	72	2.4	5.39	Thousand kernel weight	19.7	11.5267	27.8733	Ramya et al. 2010
QTL883	2D	72	2.8	6.08	Kernel weight	19.7	12.4543	26.9457	Ramya et al. 2010
QTL884	4A	6	3	8.46	Thousand kernel weight	28.2	22.9927	33.4073	Ramya et al. 2010
QTL885	4A	6	2.5	7.41	Kernel weight	28.2	22.2548	34.1452	Ramya et al. 2010
QTL886	2A	4.3	4.5	9.4	Single-kernel weight	49.4	43.1624	55.6376	Tsilo et al. 2010
QTL887	2A	4.3	4.9	10.2	Thousand kernel weight	49.4	43.6517	55.1483	Tsilo et al. 2010
QTL888	5B1	26.4	6.1	15.6	Single-kernel weight	39.3	35.5415	43.0585	Tsilo et al. 2010
QTL889	5B1	26.4	3.9	10.5	Thousand kernel weight	39.3	33.7159	44.8841	Tsilo et al. 2010
QTL890	6B1	60.2	4.4	13.3	Single-kernel weight	38.02	33.6115	42.4285	Tsilo et al. 2010
QTL891	6B1	60.2	4.8	12.4	Thousand kernel weight	38.02	33.2915	42.7485	Tsilo et al. 2010
QTL892	7A2	64.6	6.3	16.9	Single-kernel weight	135.87	132.401	139.339	Tsilo et al. 2010
QTL893	7A2	64.6	7.5	20.8	Thousand kernel weight	135.87	133.051	138.689	Tsilo et al. 2010
QTL894	1B	22	4.2	9.4	Kernel weight	37.4	30.8317	43.9683	Sun et al. 2010
QTL895	1B	13	4.1	9	Kernel weight	55.1	48.2397	61.9603	Sun et al. 2010
QTL896	4B	72.00-74.00	4.5	12.3	Kernel weight	14.85	9.83029	19.8697	Sun et al. 2010
QTL897	5A	26.00-37.00	4.3	7.8	Kernel weight	40.4	32.4843	48.3157	Sun et al. 2010
QTL898	6A	48.00-53.00	6.1	14.6	Kernel weight	59.75	55.5211	63.9789	Sun et al. 2010
QTL899	6A	61	5.6	14.2	Kernel weight	58.2	53.8519	62.5481	Sun et al. 2010
QTL900	7A	9	11.6	21.5	Kernel weight	101.6	98.7283	104.472	Sun et al. 2010
QTL901	1D	48	3.93	9.45	Tiller number	68.05	59.0112	77.0888	Li et al. 2010
QTL902	2B	74	3.97	9.12	Tiller number	88.9	79.5341	98.2659	Li et al. 2010
QTL903	2D	0	2.11	4.52	Tiller number	2.55	-16.3475	21.4475	Li et al. 2010
QTL904	3A	107	3.58	6.73	Tiller number	66.45	53.7581	79.1419	Li et al. 2010
QTL905	4D	94	4.45	21.32	Tiller number	84.2	80.1936	88.2064	Li et al. 2010
QTL906	4D	1	4.53	7.97	Tiller number	33.1	22.3827	43.8173	Li et al. 2010
QTL907	5D	67	14.01	26.89	Tiller number	63.25	60.0735	66.4265	Li et al. 2010
QTL908	5D	67	6.49	12.71	Tiller number	63.25	56.5296	69.9704	Li et al. 2010
QTL909	5D	67	13.08	28.51	Tiller number	63.25	60.254	66.246	Li et al. 2010
QTL910	5D	79	3.79	14.18	Tiller number	68.1	62.0763	74.1237	Li et al. 2010
QTL911	6A	67	3.89	8.6	Tiller number	69.2	59.2678	79.1322	Li et al. 2010
QTL912	6A	67	2.03	9.51	Tiller number	69.2	60.2182	78.1818	Li et al. 2010
QTL913	6D	64	3.36	11.28	Tiller number	65.3	57.7276	72.8724	Li et al. 2010
QTL914	6D	107	3.9	22.85	Tiller number	70.1	66.3619	73.8381	Li et al. 2010
QTL915	1A	2.01	7.34	22.4	Grain number per spike	12	6.01285	17.9871	Heidari et al. 2011
QTL916	2B	99.51	4.54	12.2	Grain number per spike	55.35	44.3572	66.3428	Heidari et al. 2011
QTL917	2B	140.51	6.56	15.7	Thousand kernel weight	69.8	61.2578	78.3422	Heidari et al. 2011
QTL918	2B	127.11	5.5	13.3	Thousand kernel weight	72.5	62.4164	82.5836	Heidari et al. 2011
QTL919	2D	64.21	4.05	12.1	Thousand kernel weight	3.6	-7.48365	14.6836	Heidari et al. 2011
QTL920	4B	62.91	4	12.9	Thousand kernel weight	17.4	7.00371	27.7963	Heidari et al. 2011
QTL921	4B	88.01	3.36	10.8	Thousand kernel weight	31.8	19.3822	44.2178	Heidari et al. 2011
QTL922	2D	0.01	4.13	10.6	Grain number per spike	0	-12.6521	12.6521	Heidari et al. 2011
QTL923	5B	197.41	3.02	7.7	Grain number per spike	139.9	122.483	157.317	Heidari et al. 2011
QTL924	4A	21.21	2.83	7.6	Grain number per spike	8.8	-8.84634	26.4463	Heidari et al. 2011
QTL925	1A	0.01	4.92	15.6	Spike number	12	3.40307	20.5969	Heidari et al. 2011
QTL926	7A	135.71	2.42	8.4	Spike number	101.45	85.4843	117.416	Heidari et al. 2011
QTL927	2D	207.81	2.79	8.3	Spike number	26.8	10.6419	42.9581	Heidari et al. 2011
QTL928	6D	21.11	2.76	9.2	Grain yield	32.4	17.8226	46.9774	Heidari et al. 2011
QTL929	6A	245.41	2.09	6.5	Grain yield	99.8	79.1674	120.433	Heidari et al. 2011
QTL930	6D	53.01	2.44	11.8	Grain yield	48.95	37.5846	60.3154	Heidari et al. 2011
QTL931	1A	68.30-95.60	5.76	8.82	Spike number per plant	51.5	47.6011	55.3989	Wang et al. 2011
QTL932	1A	68.30-95.60	3.26	4.96	Spikelet number per ear	51.5	44.5669	58.4331	Wang et al. 2011
QTL933	1A	68.30-95.60	2.82	2.94	Thousand grain weight	51.5	39.8033	63.1967	Wang et al. 2011
QTL934	1A	0.00-14.30	2.52	3.79	Spike number per plant	33.1	24.0266	42.1734	Wang et al. 2011
QTL935	1A	0.00-14.30	4.41	5.97	floret number per spikelet	33.1	27.3398	38.8602	Wang et al. 2011
QTL936	1A	0.00-14.30	6.53	9.38	Grain number per spike	33.1	29.4339	36.7661	Wang et al. 2011
QTL937	1A	14.30-42.20	4.56	6.07	Spikelet number per ear	38.1	32.4347	43.7653	Wang et al. 2011
QTL938	1A	14.30-42.20	3.06	4.06	floret number per spikelet	38.1	29.63	46.57	Wang et al. 2011
QTL939	1B	NA	3.45	5.2	Spike number per plant	105.65	99.0369	112.263	Wang et al. 2011
QTL940	2B	NA	3.96	4.5	Spike length	35.6	27.9582	43.2418	Wang et al. 2011
QTL941	2D	NA	3.15	4.88	floret number per spikelet	14.9	7.85324	21.9468	Wang et al. 2011
QTL942	2D	NA	2.89	4.3	floret number per spikelet	22.55	14.5527	30.5473	Wang et al. 2011
QTL943	2D	NA	2.59	3.88	Grain number per spike	22.55	13.6871	31.4129	Wang et al. 2011
QTL944	2D	54.00-58.70	8.17	13.61	Spike length	2.55	0.0233148	5.07669	Wang et al. 2011
QTL945	3B	NA	2.54	3.64	Spike number per plant	69.2	59.7527	78.6473	Wang et al. 2011
QTL946	3B	NA	2.9	3.43	Spike length	59.45	49.4243	69.4757	Wang et al. 2011
QTL947	3B	NA	2.99	4.46	Grain number per spike	59.45	51.7396	67.1604	Wang et al. 2011
QTL948	3D	NA	3.3	21.51	Spike number per plant	44.95	43.3513	46.5487	Wang et al. 2011
QTL949	4A	55.30-83.60	2.58	2.13	Spike length	45.9	29.7553	62.0447	Wang et al. 2011
QTL950	4A	55.30-83.60	2.74	2.76	floret number per spikelet	45.9	33.4405	58.3595	Wang et al. 2011
QTL951	4A	55.30-83.60	3.13	3.18	Grain number per spike	45.9	35.0861	56.7139	Wang et al. 2011
QTL952	4A	83.6	3.38	4.54	Spikelet number per ear	22.85	15.2755	30.4245	Wang et al. 2011
QTL953	4A	83.6	2.54	2.69	floret number per spikelet	22.85	10.0663	35.6337	Wang et al. 2011
QTL954	4A	125.3	6.39	11.89	Spike length	31.6	28.7078	34.4922	Wang et al. 2011
QTL955	4A	125.3	4.93	7.66	floret number per spikelet	31.6	27.1107	36.0893	Wang et al. 2011
QTL956	4A	125.3	4.64	7.49	Grain number per spike	31.6	27.0088	36.1912	Wang et al. 2011
QTL957	4B	51.00-71.80	5.62	9.29	floret number per spikelet	25.9	22.1984	29.6016	Wang et al. 2011
QTL958	4B	51.00-71.80	12.08	18.21	Grain number per spike	25.9	24.0116	27.7884	Wang et al. 2011
QTL959	4B	51.00-71.80	14.73	20.62	Thousand grain weight	25.9	24.2323	27.5677	Wang et al. 2011
QTL960	4B	27.80-51.00	3.62	6.22	Grain number per spike	29.25	23.7214	34.7786	Wang et al. 2011
QTL961	4B	0.00-27.80	5.89	8.61	floret number per spikelet	40.3	36.306	44.294	Wang et al. 2011
QTL962	4D	NA	2.76	3.87	Spike number per plant	71.3	62.4142	80.1858	Wang et al. 2011
QTL963	4D	NA	3.71	4.61	Spikelet number per ear	71.3	63.8405	78.7595	Wang et al. 2011
QTL964	5A	NA	3.51	4.49	Spike length	125.15	117.491	132.809	Wang et al. 2011
QTL965	5A	NA	4.66	5.36	Spikelet number per ear	125.15	118.734	131.566	Wang et al. 2011
QTL966	5A	NA	2.61	2.67	Grain number per spike	125.15	112.271	138.029	Wang et al. 2011
QTL967	5A	NA	5.82	8.41	Thousand grain weight	125.15	121.061	129.239	Wang et al. 2011
QTL968	5B	NA	4.23	8.45	Spike number per plant	76.95	72.8804	81.0196	Wang et al. 2011
QTL969	5B	NA	2.65	4.08	Grain number per spike	76.95	68.5215	85.3785	Wang et al. 2011
QTL970	5B	NA	3.77	4.97	Thousand grain weight	76.95	70.0308	83.8692	Wang et al. 2011
QTL971	5B	NA	3.26	4.13	Spikelet number per ear	60.15	51.8236	68.4764	Wang et al. 2011
QTL972	6A	106.1	3.36	3.14	floret number per spikelet	26.05	15.0983	37.0017	Wang et al. 2011
QTL973	6A	106.1	3.76	2.71	Spike number per plant	26.05	13.3606	38.7394	Wang et al. 2011
QTL974	6A	106.1	3.16	1.99	Spike length	26.05	8.7695	43.3305	Wang et al. 2011
QTL975	6A	106.1	3.05	2.29	Spikelet number per ear	26.05	11.0333	41.0667	Wang et al. 2011
QTL976	6A	106.1	3.45	2.19	Thousand grain weight	26.05	10.3476	41.7524	Wang et al. 2011
QTL977	6B	NA	9.78	11.09	Spike length	31.85	28.7492	34.9508	Wang et al. 2011
QTL978	6B	NA	4.72	6.09	Thousand grain weight	26	20.3533	31.6467	Wang et al. 2011
QTL979	6D	NA	2.58	2.54	Spikelet number per ear	106.2	92.6613	119.739	Wang et al. 2011
QTL980	6D	NA	2.85	3.46	Spikelet number per ear	102.6	92.6612	112.539	Wang et al. 2011
QTL981	7A	NA	3.05	4.51	Grain number per spike	50.8	43.1751	58.4249	Wang et al. 2011
QTL982	7B	NA	3.65	4.52	Spikelet number per ear	37.95	30.342	45.558	Wang et al. 2011
QTL983	7B	NA	4.16	6.26	Thousand grain weight	37.95	32.4567	43.4433	Wang et al. 2011
QTL984	7B	NA	2.82	3.54	Spike length	71.5	61.7858	81.2142	Wang et al. 2011
QTL985	7B	NA	4.77	7.99	floret number per spikelet	71.5	67.1961	75.8039	Wang et al. 2011
QTL986	7B	NA	4.29	7.43	Grain number per spike	71.5	66.8717	76.1283	Wang et al. 2011
QTL987	7B	NA	4.59	5.67	Thousand grain weight	143.5	137.435	149.565	Wang et al. 2011
QTL988	7B	NA	3.1	3.43	Thousand grain weight	144	133.974	154.026	Wang et al. 2011
QTL989	7B	NA	2.73	2.39	Spike length	113.15	98.7616	127.538	Wang et al. 2011
QTL990	7B	NA	2.59	1.7	Spikelet number per ear	113.15	92.9217	133.378	Wang et al. 2011
QTL991	7B	NA	4.39	6.68	floret number per spikelet	113.15	108.002	118.298	Wang et al. 2011
QTL992	7D	0	3.74	4.73	Spikelet number per ear	45.05	37.7798	52.3202	Wang et al. 2011
QTL993	7D	0	7.45	11.02	floret number per spikelet	45.05	41.9295	48.1705	Wang et al. 2011
QTL994	4B	32.00-37.00	15.5	67.6	Spike number	28.2	25.8385	30.5615	Deng et al. 2011
QTL995	4B	32.00-37.00	6.7	30.1	Spike length	28.2	22.8964	33.5036	Deng et al. 2011
QTL996	4B	32.00-37.00	8.5	39.3	Grain number per spike	28.2	24.138	32.262	Deng et al. 2011
QTL997	2B	NA	4	19	tiller number	99.965	95.2513	104.679	Naruoka et al. 2011
QTL998	6B	79	5.6	17	tiller number	39.045	33.7767	44.3133	Naruoka et al. 2011
QTL999	3B	NA	5	16	tiller number	77.915	72.3175	83.5125	Naruoka et al. 2011
QTL1000	4B	NA	3	11	tiller number	45.93	37.7881	54.0719	Naruoka et al. 2011
QTL1001	4D	NA	3.4	10	tiller number	31.15	22.194	40.106	Naruoka et al. 2011
QTL1002	1A	NA	2.5	9	tiller number	33.13	23.1788	43.0812	Naruoka et al. 2011
QTL1003	3D	NA	5.2	19	tiller number	43.5	38.7863	48.2137	Naruoka et al. 2011
QTL1004	6D	NA	4.1	12	tiller number	64.7	57.2366	72.1634	Naruoka et al. 2011
QTL1005	7B	NA	5.1	15	tiller number	141.8	135.829	147.771	Naruoka et al. 2011
QTL1006	6D	2	3.3	11.2	Grain number	12	-1.63032	25.6303	Czyczyo-Mysza et al. 2011
QTL1007	2B	121	4.1	17	Grain number	92.54	83.56	101.52	Czyczyo-Mysza et al. 2011
QTL1008	2B	128	5	17.7	Grain number	80.8	72.1752	89.4248	Czyczyo-Mysza et al. 2011
QTL1009	5D	17	3.1	12	Grain number	47	34.2784	59.7216	Czyczyo-Mysza et al. 2011
QTL1010	5A	86	3.4	10	YIELD	56.9	41.634	72.166	Czyczyo-Mysza et al. 2011
QTL1011	6B	68	4.5	14.1	YIELD	52.6	41.7731	63.4269	Czyczyo-Mysza et al. 2011
QTL1012	2A	131.7	3.5	10	Thousand kernel weight	99.42	94.0582	104.782	Peleg et al. 2011
QTL1013	2A	131.7	3.5	6.7	Thousand kernel weight	99.42	91.4173	107.423	Peleg et al. 2011
QTL1014	2B	128	5.3	6.8	Thousand kernel weight	116.69	108.805	124.575	Peleg et al. 2011
QTL1015	2B	128	5.3	10	Thousand kernel weight	116.69	111.328	122.052	Peleg et al. 2011
QTL1016	2B	116.5	5.5	10.5	Spike harvest index	109.37	104.263	114.477	Peleg et al. 2011
QTL1017	2B	116.5	5.5	1.8	Spike harvest index	109.37	79.582	139.158	Peleg et al. 2011
QTL1018	2B	57.1	14.4	13	Kernel number per spike	65.4	61.2755	69.5245	Peleg et al. 2011
QTL1019	2B	57.1	14.4	13	Kernel number per spike	65.4	61.2755	69.5245	Peleg et al. 2011
QTL1020	3A	107.8	9	4.7	Kernel number per spike	114.31	102.902	125.718	Peleg et al. 2011
QTL1021	3A	107.8	9	9.9	Kernel number per spike	114.31	108.894	119.726	Peleg et al. 2011
QTL1022	3B	163.7	5.4	5.4	Kernel number per spike	121.63	111.701	131.559	Peleg et al. 2011
QTL1023	3B	163.7	5.4	4.1	Kernel number per spike	121.63	108.552	134.708	Peleg et al. 2011
QTL1024	4A	25	10.7	13	Spike harvest index	27	22.8755	31.1245	Peleg et al. 2011
QTL1025	4A	25	12	14.1	Thousand kernel weight	27	23.1973	30.8027	Peleg et al. 2011
QTL1026	4A	25	4.3	4.1	Kernel number per spike	27	13.9223	40.0777	Peleg et al. 2011
QTL1027	4A	25	10.7	11.7	Spike harvest index	27	22.4172	31.5828	Peleg et al. 2011
QTL1028	4A	25	12	16.6	Thousand kernel weight	27	23.77	30.23	Peleg et al. 2011
QTL1029	4A	25	4.3	2.2	Kernel number per spike	27	2.62799	51.372	Peleg et al. 2011
QTL1030	4B	44.3	4.9	4.1	Thousand kernel weight	30	16.9223	43.0777	Peleg et al. 2011
QTL1031	4B	44.3	4.9	6.6	Thousand kernel weight	30	21.876	38.124	Peleg et al. 2011
QTL1032	5A	137.8	7.4	4.9	Kernel number per spike	112.8	101.857	123.743	Peleg et al. 2011
QTL1033	5A	137.8	7.4	8.3	Kernel number per spike	112.8	106.34	119.26	Peleg et al. 2011
QTL1034	5A	15.6	7.1	6.4	Spike harvest index	34.3	25.9221	42.6779	Peleg et al. 2011
QTL1035	5A	15.6	7.1	11.4	Spike harvest index	34.3	29.5966	39.0034	Peleg et al. 2011
QTL1036	5A	86.7	3.3	10	Thousand kernel weight	58.5	53.1382	63.8618	Peleg et al. 2011
QTL1037	5A	86.7	3.3	7	Thousand kernel weight	58.5	50.8402	66.1598	Peleg et al. 2011
QTL1038	5B	54.8	7	9.3	Thousand kernel weight	63.7	57.9346	69.4654	Peleg et al. 2011
QTL1039	5B	54.8	7	10	Thousand kernel weight	63.7	58.3382	69.0618	Peleg et al. 2011
QTL1040	6B	124	9.5	10.9	Thousand kernel weight	44	39.0809	48.9191	Peleg et al. 2011
QTL1041	6B	124	9.5	16.8	Thousand kernel weight	44	40.8084	47.1916	Peleg et al. 2011
QTL1042	7A	71.3	4.9	4.5	Thousand kernel weight	86.53	74.6148	98.4452	Peleg et al. 2011
QTL1043	7A	71.3	4.9	5.1	Thousand kernel weight	86.53	76.0166	97.0434	Peleg et al. 2011
QTL1044	7B	40.7	6.2	11.1	Spike harvest index	28.6	23.7695	33.4305	Peleg et al. 2011
QTL1045	7B	40.7	6.2	3.2	Spike harvest index	28.6	11.8442	45.3558	Peleg et al. 2011
QTL1046	1D	24	3	3.4	Spike length	106	101.058	110.942	Cui et al. 2011
QTL1047	1D	24	3	3.4	Spike length	106	101.058	110.942	Cui et al. 2011
QTL1048	2A	49	3	3.85	Spike length	120.4	116.035	124.765	Cui et al. 2011
QTL1049	2A	49	3	3.85	Spike length	120.4	116.035	124.765	Cui et al. 2011
QTL1050	2A	4	3	4.85	Spike length	52	48.5352	55.4648	Cui et al. 2011
QTL1051	2A	4	3	4.85	Spike length	52	48.5352	55.4648	Cui et al. 2011
QTL1052	2D	37	3	3.82	Spike length	15.8	11.401	20.199	Cui et al. 2011
QTL1053	2D	37	3	3.82	Spike length	15.8	11.401	20.199	Cui et al. 2011
QTL1054	3B	53	3	4.39	Spike length	15.7	11.8722	19.5278	Cui et al. 2011
QTL1055	3B	53	3	3.26	Spike length	60.1	54.9454	65.2546	Cui et al. 2011
QTL1056	3B	53	3	3.26	Spike length	60.1	54.9454	65.2546	Cui et al. 2011
QTL1057	4D	23	3	16.21	Spike length	30.2	29.1633	31.2367	Cui et al. 2011
QTL1058	4D	23	3	16.21	Spike length	30.2	29.1633	31.2367	Cui et al. 2011
QTL1059	5D	26	3	3.22	Spike length	15.25	10.0313	20.4687	Cui et al. 2011
QTL1060	5D	26	3	3.22	Spike length	15.25	10.0313	20.4687	Cui et al. 2011
QTL1061	6A	146	3	2.91	Spike length	54.3	48.5254	60.0746	Cui et al. 2011
QTL1062	6A	146	3	2.91	Spike length	54.3	48.5254	60.0746	Cui et al. 2011
QTL1063	7B	15	3	3.98	Spike length	100.3	96.0779	104.522	Cui et al. 2011
QTL1064	7B	15	3	3.98	Spike length	100.3	96.0779	104.522	Cui et al. 2011
QTL1065	3D	57.6	3.27	7.69	Thousand grain weight (g)	63.5	51.0596	75.9404	Wu et al. 2011
QTL1066	2A	188.7	4.26	12.83	Number of spikes per plant	49.8	42.3435	57.2565	Wu et al. 2011
QTL1067	6B	75.3	2.81	6.52	number of grains per spike	34.6	19.9272	49.2728	Wu et al. 2011
QTL1068	4B	85.91	4.44	13.12	GY (t/ha)	34.3	27.0083	41.5917	Wu et al. 2011
QTL1069	7B	246.3	2.73	7.77	Number of spikes per plant	61.6	49.2877	73.9123	Wu et al. 2011
QTL1070	1D	97.41	3.61	8.78	Number of spikes per plant	45.2	34.304	56.096	Wu et al. 2011
QTL1071	3A	154.3	3.03	7.09	Thousand grain weight (g)	72.8	59.3068	86.2932	Wu et al. 2011
QTL1072	3A	154.3	3.7	8.76	number of grains per spike	72.8	61.8791	83.7209	Wu et al. 2011
QTL1073	3D	72.2	3.1	7.45	Thousand grain weight (g)	40.9	28.0588	53.7412	Wu et al. 2011
QTL1074	7A	48.31	2.69	7.93	Biomass (g)	4	-8.06389	16.0639	Wu et al. 2011
QTL1075	7B	207.5	2.98	9.42	Number of spikes per plant	100.3	90.1443	110.456	Wu et al. 2011
QTL1076	6A	110.7	5.2	14.31	Thousand grain weight (g)	55.3	48.6147	61.9853	Wu et al. 2011
QTL1077	6A	120.71	5.18	14.74	Thousand grain weight (g)	71.1	64.6097	77.5903	Wu et al. 2011
QTL1078	2D	224.2	2.92	6.24	Thousand grain weight (g)	15.8	0.468803	31.1312	Wu et al. 2011
QTL1079	3B	50.91	3.28	8.86	GY (t/ha)	59.9	49.1024	70.6976	Wu et al. 2011
QTL1080	1A	#REF!	2.1	4	QCpt	31.8	17.9395	45.6605	Manickavelu et al. 2011
QTL1081	1A	#N/A	2.7	5	QEl	31.8	20.7116	42.8884	Manickavelu et al. 2011
QTL1082	1B	2.7	2.1	4	QCpt	25	11.1395	38.8605	Manickavelu et al. 2011
QTL1083	1B	2.7	2.66	10	QSpn	25	19.4558	30.5442	Manickavelu et al. 2011
QTL1084	2A	#N/A	4.41	12	QEl	49.4	44.7798	54.0202	Manickavelu et al. 2011
QTL1085	2A	#N/A	4.41	12	QEl	54.1	49.4798	58.7202	Manickavelu et al. 2011
QTL1086	2B	0.1	8.35	19	QSpn	57.1	54.182	60.018	Manickavelu et al. 2011
QTL1087	2B	0.1	16.02	42	Days to heading	57.1	55.7799	58.4201	Manickavelu et al. 2011
QTL1088	2B	0.1	16.02	42	Days to heading	57.1	55.7799	58.4201	Manickavelu et al. 2011
QTL1089	2D	5.5	3.63	8	QCpt	2.1	-4.83027	9.03027	Manickavelu et al. 2011
QTL1090	2D	5.5	4	9	QCpt	2.1	-4.06024	8.26024	Manickavelu et al. 2011
QTL1091	5A	#N/A	13.03	46	QCpt	77.2	75.9947	78.4053	Manickavelu et al. 2011
QTL1092	5A	#N/A	7.57	28	QCpt	77.2	75.2199	79.1801	Manickavelu et al. 2011
QTL1093	5B	1	4.19	8	Days to heading	66.5	59.5697	73.4303	Manickavelu et al. 2011
QTL1094	5B	0	5.32	9	Days to heading	118.1	111.94	124.26	Manickavelu et al. 2011
QTL1095	6A	#N/A	2.75	6	QCpt	54.1	44.8596	63.3404	Manickavelu et al. 2011
QTL1096	6D	4.8	3.22	11	QSpn	70.7	65.6598	75.7402	Manickavelu et al. 2011
QTL1097	7A	8.1	2.83	8	Days to heading	85	78.0697	91.9303	Manickavelu et al. 2011
QTL1098	7A	8.1	2.83	8	Days to heading	85	78.0697	91.9303	Manickavelu et al. 2011
QTL1099	7B	2	2.18	4	Days to heading	33.1	19.2395	46.9605	Manickavelu et al. 2011
QTL1100	2B	112	4.84	14.39	Spikes per square meter	57.1	52.6404	61.5596	Tang et al. 2011
QTL1101	2B	192.3	3.42	12.5	Grain number per spike	80.2	75.0661	85.3339	Tang et al. 2011
QTL1102	3B	67.4	2.64	6.15	GSM	59	48.5653	69.4347	Tang et al. 2011
QTL1103	4A	32.60-50.80	4.69	15.99	Grain number per spike	51.05	47.0367	55.0633	Tang et al. 2011
QTL1104	4A	32.60-50.80	4.19	9.86	GSM	51.05	44.5416	57.5584	Tang et al. 2011
QTL1105	4A	32.60-50.80	2.77	8.98	Thousand kernel weight	51.05	43.9038	58.1962	Tang et al. 2011
QTL1106	4B	40.8	2.67	9.27	biomass yield per plant	34.3	27.3773	41.2227	Tang et al. 2011
QTL1107	4B	40.8	5.53	14.99	Spikes per square meter	34.3	30.0189	38.5811	Tang et al. 2011
QTL1108	4B	29.70-40.80	3.25	10.24	Grain weight per spike	36.95	30.6831	43.2169	Tang et al. 2011
QTL1109	4D	198.70-232.10	4.17	10.71	BY	60.1	54.1081	66.0919	Tang et al. 2011
QTL1110	4D	198.70-232.10	2.96	7.91	GSM	60.1	51.9871	68.2129	Tang et al. 2011
QTL1111	5A	149.60-163.70	4.11	11.24	GSM	53.8	48.0906	59.5094	Tang et al. 2011
QTL1112	5A	149.60-163.70	2.97	6.93	Thousand kernel weight	53.8	44.5398	63.0602	Tang et al. 2011
QTL1113	5B	92.3	3.17	6.85	Grain number per spike	59.3	49.9316	68.6684	Tang et al. 2011
QTL1114	5B	92.3	5.92	15.65	GSM	59.3	55.1995	63.4005	Tang et al. 2011
QTL1115	5B	92.3	4.01	9.5	Thousand kernel weight	59.3	52.5449	66.0551	Tang et al. 2011
QTL1116	5B	0	7.99	20.69	Grain weight per spike	59.3	56.1983	62.4017	Tang et al. 2011
QTL1117	5B	49.80-49.80	3.22	8.89	Grain number per spike	65.1	57.8814	72.3186	Tang et al. 2011
QTL1118	5B	49.80-49.80	8.16	19.78	SSM	65.1	61.8557	68.3443	Tang et al. 2011
QTL1119	5B	121.2	3.34	10.09	BY	59.4	53.0399	65.7601	Tang et al. 2011
QTL1120	5B	121.2	6.7	18.29	Thousand kernel weight	59.4	55.8913	62.9087	Tang et al. 2011
QTL1121	6A	88.00-96.60	3.3	11.11	Grain weight per spike	54.1	48.3238	59.8762	Tang et al. 2011
QTL1122	6B	51.9	2.81	7.76	GY	52.6	44.3303	60.8697	Tang et al. 2011
QTL1123	6D	0.00-14.10	4.7	14.44	GY	114.5	110.056	118.944	Tang et al. 2011
QTL1124	7A	0.00-0.00	4.97	15.21	Thousand kernel weight	65.1	60.8809	69.3191	Tang et al. 2011
QTL1125	7A	14.2	2.76	9.58	Grain number per spike	91.2	84.5013	97.8987	Tang et al. 2011
QTL1126	7D	17.10-25.10	4.73	11.31	Grain number per spike	104	98.326	109.674	Tang et al. 2011
QTL1127	7D	17.10-25.10	3.6	7.51	Grain weight per spike	104	95.455	112.545	Tang et al. 2011
QTL1128	7D	17.10-25.10	4.88	10.18	SSM	104	97.6961	110.304	Tang et al. 2011
QTL1129	7D	0	4.25	10.31	GSM	18.2	11.9756	24.4244	Tang et al. 2011
QTL1130	7D	0	3.28	7.74	GY	18.2	9.90889	26.4911	Tang et al. 2011
QTL1131	7D	0.00-17.10	3.34	8.69	Grain number per spike	101.15	93.7653	108.535	Tang et al. 2011
QTL1132	7D	0.00-17.10	3.19	8.4	Thousand kernel weight	101.15	93.5103	108.79	Tang et al. 2011
QTL1133	7D	0.00-17.10	2.71	7	Thousand kernel weight	101.15	91.9824	110.318	Tang et al. 2011
QTL1134	3A	2.8	8.5	15.4	Spikes per square meter	24.3	21.9268	26.6732	Ali et al. 2011
QTL1135	3A	1.8	5.1	9.7	Kernels per spike	22.95	19.1823	26.7177	Ali et al. 2011
QTL1136	3A	1.8	4.3	8	1000-kernel weight	11.25	6.68161	15.8184	Ali et al. 2011
QTL1137	3A	47.3	3.6	6.9	1000-kernel weight	61.3	56.0033	66.5967	Ali et al. 2011
QTL1138	3A	2.8	5.6	10.7	1000-kernel weight	12.7	9.28438	16.1156	Ali et al. 2011
QTL1139	3A	56.4	3.2	6.3	Kernels per spike	68.7	62.8989	74.5011	Ali et al. 2011
QTL1140	3A	90.8	2.9	5.3	Grain yield	78.1	71.2043	84.9957	Ali et al. 2011
QTL1141	3A	90.8	2.8	5.2	Anthesis date	78.1	71.0717	85.1283	Ali et al. 2011
QTL1142	3A	42	7.2	13.5	Anthesis date	67.7	64.9928	70.4072	Ali et al. 2011
QTL1143	3A	44.5	6.7	11.4	Grain yield	67.1	63.8941	70.3059	Ali et al. 2011
QTL1144	3A	44.5	6.1	11.4	Spikes per square meter	67.1	63.8941	70.3059	Ali et al. 2011
QTL1145	3A	105.3	3	5.8	Anthesis date	62.6	56.2988	68.9012	Ali et al. 2011
QTL1146	3A	52.1	3.3	7.5	Grain yield	67.1	62.2271	71.9729	Ali et al. 2011
QTL1147	3A	52.1	3.8	8.5	Kernels per spike	67.1	62.8003	71.3997	Ali et al. 2011
QTL1148	3A	56.1	3.9	7	Kernels per spike	67.9	62.679	73.121	Ali et al. 2011
QTL1149	3A	4.5	6.8	12.6	Grain yield	35.25	32.3494	38.1506	Ali et al. 2011
QTL1150	3A	85.5	2.6	5.6	Spikes per square meter	78.1	71.5737	84.6263	Ali et al. 2011
QTL1151	3A	45.4	3.2	5.2	Grain yield	61.1	54.0717	68.1283	Ali et al. 2011
QTL1152	3A	45.4	6.5	10.6	Spikes per square meter	61.1	57.6522	64.5478	Ali et al. 2011
QTL1153	1B	10.1	3.55	9.54	Grain number per spike	83.1	76.9979	89.2021	Patil et al. 2012
QTL1154	2A	107.2	3.36	9.45	Grain number per spike	31.5	25.3398	37.6602	Patil et al. 2012
QTL1155	2B	193.4	3.74	16.88	Grain number per spike	57.1	53.6513	60.5487	Patil et al. 2012
QTL1156	7B	57.9	3.14	9.53	Grain number per spike	31.3	25.1915	37.4085	Patil et al. 2012
QTL1157	7A	236.2	3.15	10.55	Spike length	101.2	95.6821	106.718	Patil et al. 2012
QTL1158	2A	60	2.82	8.56	Spikelet number per spike(SPN)	50.5	43.6993	57.3007	Patil et al. 2012
QTL1159	4A	132.3	2.89	16.47	Spikelet number per spike(SPN)	56	52.4654	59.5346	Patil et al. 2012
QTL1160	4A	31.8	3.01	7.65	Spikelet number per spike(SPN)	22.4	14.7903	30.0097	Patil et al. 2012
QTL1161	7A	51.2	3.71	17.37	Spikelet number per spike(SPN)	42.8	39.4486	46.1514	Patil et al. 2012
QTL1162	2A	60	4.08	12.36	Thousand kernel weight	50.5	45.7901	55.2099	Patil et al. 2012
QTL1163	2B	193.4	4.07	23.7	Thousand kernel weight	57.1	54.6437	59.5563	Patil et al. 2012
QTL1164	4B	101.8	3.56	12.08	Thousand kernel weight	12	7.18094	16.8191	Patil et al. 2012
QTL1165	2A	147.4	4.69	16.4	Grain yield	54.4	50.8503	57.9497	Patil et al. 2012
QTL1166	2A	9.3	3.5	16.3	Grain yield	30.3	26.7286	33.8714	Patil et al. 2012
QTL1167	6A	0	2.94	7.63	Grain yield	57.6	49.9703	65.2297	Patil et al. 2012
QTL1168	4B	33.40-64.40	4.19	19.73	Thousand kernel weight	13.55	10.5995	16.5005	Patil et al. 2012
QTL1169	2B	48.40-67.10	2.81	11.2	Grain number per spike	72	66.8023	77.1977	Patil et al. 2012
QTL1170	1B	309.50-329.20	3.02	10.32	Grain yield	55.1	49.4591	60.7409	Patil et al. 2012
QTL1171	4B	102.30-118.00	3.87	12.82	Spike length	34.95	30.4091	39.4909	Patil et al. 2012
QTL1172	4B	123.6	3.78	11.09	Grain yield	41.4	36.1507	46.6493	Patil et al. 2012
QTL1173	4B	55.80-66.40	4.4	14.68	Thousand kernel weight	28	24.0344	31.9656	Patil et al. 2012
QTL1174	5B	28.90-63.80	3.31	8.23	Grain number per spike	44.6	37.5266	51.6734	Patil et al. 2012
QTL1175	4B	123.60-163.70	3.57	18.74	Spikelet number per spike(SPN)	42.5	39.3936	45.6064	Patil et al. 2012
QTL1176	7A	74.50-87.40	3.09	7.86	Thousand kernel weight	67.7	60.2936	75.1064	Patil et al. 2012
QTL1177	2A	0.00-9.30	2.77	7.96	Grain yield	26	18.6866	33.3134	Patil et al. 2012
QTL1178	4A	224.30-233.10	2.89	9.08	Grain number per spike	76.8	70.3887	83.2113	Patil et al. 2012
QTL1179	1B	NA	4.59	8	Harvest Index	35.15	30.2757	40.0243	Bennett et al. 2012a
QTL1180	2A	NA	1.56	2	Harvest Index	123.7	104.203	143.197	Bennett et al. 2012a
QTL1181	3B	NA	3.55	6	Harvest Index	63.96	57.4609	70.4591	Bennett et al. 2012a
QTL1182	3D	NA	1.56	2	Harvest Index	44.1	24.6027	63.5973	Bennett et al. 2012a
QTL1183	4D	NA	3.42	6	Harvest Index	33.1	26.6009	39.5991	Bennett et al. 2012a
QTL1184	7A	NA	3.87	7	Harvest Index	111.65	106.079	117.221	Bennett et al. 2012a
QTL1185	7A	NA	1.47	2	Harvest Index	121.935	102.438	141.432	Bennett et al. 2012a
QTL1186	1A	NA	4.98	4	Grain number per spike	66.6	56.8514	76.3486	Bennett et al. 2012a
QTL1187	3A	NA	5.26	9	Grain number per spike	61.3	56.9673	65.6327	Bennett et al. 2012a
QTL1188	7A	NA	2.98	4	Grain number per spike	4.9	-4.84864	14.6486	Bennett et al. 2012a
QTL1189	1B	NA	4.65	9	Grain number per spikelet	37.88	33.5473	42.2127	Bennett et al. 2012a
QTL1190	4B	NA	3.53	5	Grain number per spikelet	46.3	38.5011	54.0989	Bennett et al. 2012a
QTL1191	6A	NA	3.83	3	Grain number per spikelet	57.6	44.6018	70.5982	Bennett et al. 2012a
QTL1192	6A	NA	3.83	4	Grain number per spikelet	99.8	90.0514	109.549	Bennett et al. 2012a
QTL1193	7A	NA	5.78	11	Grain number per spikelet	135.87	132.325	139.415	Bennett et al. 2012a
QTL1194	1A	NA	3.96	11	Grain number per square meter	183.31	179.765	186.855	Bennett et al. 2012a
QTL1195	2B	NA	5.76	6	Grain number per square meter	146.72	140.221	153.219	Bennett et al. 2012a
QTL1196	2D	NA	3.16	8	Grain number per square meter	39.33	34.4557	44.2043	Bennett et al. 2012a
QTL1197	3A	NA	5.06	6	Grain number per square meter	62.6	56.1009	69.0991	Bennett et al. 2012a
QTL1198	3B	NA	3.55	6	Grain number per square meter	60.1	53.6009	66.5991	Bennett et al. 2012a
QTL1199	4D	NA	3.71	9	Grain number per square meter	33.1	28.7673	37.4327	Bennett et al. 2012a
QTL1200	6A	NA	5.56	7	Grain number per square meter	78.7	73.1293	84.2707	Bennett et al. 2012a
QTL1201	6D	NA	4.3	4	Grain number per square meter	58.9	49.1514	68.6486	Bennett et al. 2012a
QTL1202	7A	NA	3.7	5	Grain number per square meter	58.885	51.0861	66.6839	Bennett et al. 2012a
QTL1203	7A	NA	3.75	5	Grain number per square meter	123.76	115.961	131.559	Bennett et al. 2012a
QTL1204	7B	NA	4.11	6	Grain number per square meter	49	42.5009	55.4991	Bennett et al. 2012a
QTL1205	7B	NA	5.49	8	Grain number per square meter	68.5	63.6257	73.3743	Bennett et al. 2012a
QTL1206	1D	NA	3.12	3	Thousand kernel weight	84.1	71.1018	97.0982	Bennett et al. 2012a
QTL1207	2B	NA	4.62	14	Thousand kernel weight	68.35	65.5647	71.1353	Bennett et al. 2012a
QTL1208	2B	NA	4.08	17	Thousand kernel weight	146.21	143.916	148.504	Bennett et al. 2012a
QTL1209	3D	NA	3	2	Thousand kernel weight	63.1	43.6027	82.5973	Bennett et al. 2012a
QTL1210	4A	NA	4.65	4	Thousand kernel weight	48.19	38.4414	57.9386	Bennett et al. 2012a
QTL1211	5B	NA	2.9	7	Thousand kernel weight	99.245	93.6743	104.816	Bennett et al. 2012a
QTL1212	6A	NA	6.21	11	Thousand kernel weight	78.7	75.155	82.245	Bennett et al. 2012a
QTL1213	7A	NA	2.9	7	Thousand kernel weight	86.77	81.1993	92.3407	Bennett et al. 2012a
QTL1214	7D	NA	2.83	4	Thousand kernel weight	55.6	45.8514	65.3486	Bennett et al. 2012a
QTL1215	1A	NA	3.16	4	Grain yield	183.31	173.561	193.059	Bennett et al. 2012a
QTL1216	1B	NA	3.46	6	Grain yield	63.92	57.4209	70.4191	Bennett et al. 2012a
QTL1217	2A	NA	3.51	3	Grain yield	24.26	11.2618	37.2582	Bennett et al. 2012a
QTL1218	2B	NA	4.35	4	Grain yield	112.975	103.226	122.724	Bennett et al. 2012a
QTL1219	2D	NA	4.57	18	Grain yield	39.33	37.1636	41.4964	Bennett et al. 2012a
QTL1220	4D	NA	2.97	5	Grain yield	61.75	53.9511	69.5489	Bennett et al. 2012a
QTL1221	4D	NA	2.86	6	Grain yield	32.45	25.9509	38.9491	Bennett et al. 2012a
QTL1222	6D	NA	2.86	4	Grain yield	58.9	49.1514	68.6486	Bennett et al. 2012a
QTL1223	6D	NA	2.86	3	Grain yield	67.28	54.2818	80.2782	Bennett et al. 2012a
QTL1224	7A	NA	7.97	12	Grain yield	73	69.7505	76.2495	Bennett et al. 2012a
QTL1225	1D	117.8	3.16	8	Thousand kernel weight	84.1	79.2257	88.9743	Bennett et al. 2012b
QTL1226	2B	52.7	4.72	8	Thousand kernel weight	109.445	104.571	114.319	Bennett et al. 2012b
QTL1227	3A	56.9	7.77	13	Thousand kernel weight	61.3	58.3004	64.2996	Bennett et al. 2012b
QTL1228	3A	56.9	2.79	3	Grain yield	61.3	48.3018	74.2982	Bennett et al. 2012b
QTL1229	3B	75.8	3.87	6	Thousand kernel weight	63.44	56.9409	69.9391	Bennett et al. 2012b
QTL1230	3B	190.7	11.56	22	Grain yield	117.965	116.193	119.737	Bennett et al. 2012b
QTL1231	3B	73.1	9.18	14	Grain yield	60.51	57.7247	63.2953	Bennett et al. 2012b
QTL1232	3D	64.9	4.46	4	Grain yield	39.2	29.4514	48.9486	Bennett et al. 2012b
QTL1233	4D	5.5	3.33	4	Grain yield	32.8	23.0514	42.5486	Bennett et al. 2012b
QTL1234	5B	83.1	3.23	4	Grain yield	16.69	6.94136	26.4386	Bennett et al. 2012b
QTL1235	5B	72.1	7.84	13	Thousand kernel weight	19.39	16.3904	22.3896	Bennett et al. 2012b
QTL1236	6A	95.2	5.67	8	Thousand kernel weight	78.7	73.8257	83.5743	Bennett et al. 2012b
QTL1237	7A	115.6	3.07	6	Grain yield	84.73	78.2309	91.2291	Bennett et al. 2012b
QTL1238	7A	1	3.01	4	Grain yield	31.66	21.9114	41.4086	Bennett et al. 2012b
QTL1239	7A	109.4	5.35	8	Thousand kernel weight	73	68.1257	77.8743	Bennett et al. 2012b
QTL1240	7B	48.8	3.68	6	Thousand kernel weight	59.59	53.0909	66.0891	Bennett et al. 2012b
QTL1241	2D	NA	3	1.07	Grain yield	14.1	-75.3081	103.508	Wu et al. 2012
QTL1242	7A	NA	3	2.56	Grain number per spike	78.9	41.5302	116.27	Wu et al. 2012
QTL1243	4B	NA	3	4.77	Spikelet number per spike	30	9.9441	50.0559	Wu et al. 2012
QTL1244	5A	NA	3	7.43	Spikelet number per spike	137.5	124.624	150.376	Wu et al. 2012
QTL1245	5A	NA	3	7.18	sterile spikelet number per spike	137.5	124.176	150.824	Wu et al. 2012
QTL1246	2D	NA	3	3.09	Spike length	5.1	-25.8601	36.0601	Wu et al. 2012
QTL1247	2D	NA	3	2.73	Spike length	0	-35.0427	35.0427	Wu et al. 2012
QTL1248	2D	NA	3	3.47	Spike length	8.1	-19.4696	35.6696	Wu et al. 2012
QTL1249	4B	NA	3	4.02	Spike length	30	6.20232	53.7977	Wu et al. 2012
QTL1250	5A	NA	3	2.4	Spike length	49.6	9.73889	89.4611	Wu et al. 2012
QTL1251	7A	NA	3	6.08	Spike length	4	-11.7346	19.7346	Wu et al. 2012
QTL1252	3D	NA	3	5.42	Spikelet density	43.5	25.8493	61.1507	Wu et al. 2012
QTL1253	7A	NA	3	4.41	Spikelet density	4	-17.6931	25.6931	Wu et al. 2012
QTL1254	5A	NA	3	2.59	Proportion of fertile spikelets	137.5	100.563	174.437	Wu et al. 2012
QTL1255	7A	NA	3	2.1	Proportion of fertile spikelets	78.9	33.3444	124.456	Wu et al. 2012
QTL1256	6B	NA	2	8	GPC/Grain yield per spike	47.3	38.8104	55.7896	Blanco et al. 2012
QTL1257	6B	NA	2.5	9.8	GPC/Grain number per spike	47.3	40.3697	54.2303	Blanco et al. 2012
QTL1258	6B	NA	4.3	16	GPC/Thousand kernel weight	47.3	43.0552	51.5448	Blanco et al. 2012
QTL1259	6B	NA	4.7	17.4	Thousand kernel weight	53.85	49.9467	57.7533	Blanco et al. 2012
QTL1260	3A	NA	4.3	16.2	GPC/Grain number per spike	66.3	62.1076	70.4924	Blanco et al. 2012
QTL1261	3A	NA	5	18.3	Thousand kernel weight	66.3	62.5887	70.0113	Blanco et al. 2012
QTL1262	2B	NA	6	21.6	GPC/Grain yield per spike	94.4	91.2557	97.5443	Blanco et al. 2012
QTL1263	4B	NA	5.2	19	GPC/Grain yield per spike	39.6	36.0254	43.1746	Blanco et al. 2012
QTL1264	4A	NA	6	21.6	GPC/Grain yield per spike	23.5	20.3557	26.6443	Blanco et al. 2012
QTL1265	3B	NA	6.6	23.6	GPC/Grain yield per spike	7	4.12218	9.87782	Blanco et al. 2012
QTL1266	2A	NA	3.4	12.9	GPC/Grain yield per spike	62.1	56.8351	67.3649	Blanco et al. 2012
QTL1267	2B	NA	6.9	24.5	GPC/Grain number per spike	94.4	91.6279	97.1721	Blanco et al. 2012
QTL1268	4B	NA	6.4	22.8	GPC/Grain number per spike	39.6	36.6212	42.5788	Blanco et al. 2012
QTL1269	4A	NA	5	18.5	GPC/Grain number per spike	23.5	19.8288	27.1712	Blanco et al. 2012
QTL1270	3B	NA	7.9	27.6	GPC/Grain number per spike	7	4.53925	9.46075	Blanco et al. 2012
QTL1271	2A	NA	3.5	13.4	GPC/Grain number per spike	62.1	57.0316	67.1684	Blanco et al. 2012
QTL1272	7B	NA	2.8	10.8	GPC/Grain number per spike	63.7	57.4114	69.9886	Blanco et al. 2012
QTL1273	2B	NA	5.7	20.7	GPC/Thousand kernel weight	94.4	91.119	97.681	Blanco et al. 2012
QTL1274	4A	NA	4.5	16.7	GPC/Thousand kernel weight	23.5	19.4331	27.5669	Blanco et al. 2012
QTL1275	3B	NA	5	18.6	GPC/Thousand kernel weight	7	3.34857	10.6514	Blanco et al. 2012
QTL1276	2A	NA	5.4	19.8	GPC/Thousand kernel weight	62.1	58.6699	65.5301	Blanco et al. 2012
QTL1277	6A	NA	3.1	11.7	Grain yield per spike	32.66	26.8552	38.4648	Blanco et al. 2012
QTL1278	7A	NA	4.7	17.3	Grain yield per spike	64.62	60.6942	68.5458	Blanco et al. 2012
QTL1279	4A	NA	2.3	9	Grain yield per spike	23.5	15.9537	31.0463	Blanco et al. 2012
QTL1280	3B	NA	9.3	31.7	Grain yield per spike	7	4.85752	9.14248	Blanco et al. 2012
QTL1281	7B	NA	4.2	15.9	Grain yield per spike	63.7	59.4285	67.9715	Blanco et al. 2012
QTL1282	2A	NA	6.3	22.8	Grain yield per spike	43.2	40.2212	46.1788	Blanco et al. 2012
QTL1283	6A	NA	2.9	11.3	Kernel number per spike	32.66	26.6497	38.6703	Blanco et al. 2012
QTL1284	4A	NA	3.2	12.2	Kernel number per spike	23.5	17.9331	29.0669	Blanco et al. 2012
QTL1285	4B	NA	3	11.7	Kernel number per spike	11.6	5.79516	17.4048	Blanco et al. 2012
QTL1286	3B	NA	5.7	20.7	Kernel number per spike	7	3.719	10.281	Blanco et al. 2012
QTL1287	2B	NA	5.8	21.2	Kernel number per spike	89.44	86.2364	92.6436	Blanco et al. 2012
QTL1288	2A	NA	13.9	43.4	Kernel number per spike	43.2	41.6351	44.7649	Blanco et al. 2012
QTL1289	4B	NA	5.3	19.4	Thousand kernel weight	39.6	36.0991	43.1009	Blanco et al. 2012
QTL1290	3B	NA	5.7	20.7	Thousand kernel weight	7	3.719	10.281	Blanco et al. 2012
QTL1291	7B	NA	3.4	13.1	Thousand kernel weight	63.7	58.5155	68.8845	Blanco et al. 2012
QTL1292	2A	NA	5.1	18.7	Thousand kernel weight	43.2	39.5681	46.8319	Blanco et al. 2012
QTL1293	4B	NA	3	2.53	Grain weight	31.8	-6.01291	69.6129	Li et al. 2012b
QTL1294	7D	NA	3	6.28	Grain weight	61.45	46.2165	76.6835	Li et al. 2012b
QTL1295	5B	NA	3	3.26	Grain weight	65.1	35.7544	94.4456	Li et al. 2012b
QTL1296	2D	NA	3	6.63	Grain weight	6.95	-7.47936	21.3794	Li et al. 2012b
QTL1297	7B	NA	3	5.27	Grain weight	54.1	35.9469	72.2531	Li et al. 2012b
QTL1298	4B	NA	3	2.55	Grain weight	38.1	0.58366	75.6163	Li et al. 2012b
QTL1299	1B	NA	3	2.68	Grain weight	69.1	33.4035	104.797	Li et al. 2012b
QTL1300	1B	NA	3	7.92	Grain weight	38.1	26.0209	50.1791	Li et al. 2012b
QTL1301	1B	NA	3	7.13	Grain weight	110.9	97.4825	124.317	Li et al. 2012b
QTL1302	2A	NA	3	8.62	Grain weight	31.5	20.4018	42.5982	Li et al. 2012b
QTL1303	2B	NA	3	0.48	Grain weight	88.8	-110.506	288.106	Li et al. 2012b
QTL1304	3D	NA	3	6.06	Grain weight	40.9	25.1134	56.6866	Li et al. 2012b
QTL1305	3D	NA	3	13.02	Grain weight	43.5	36.1523	50.8477	Li et al. 2012b
QTL1306	6A	NA	3	3.97	Grain weight	67.7	43.6026	91.7974	Li et al. 2012b
QTL1307	6B	NA	3	4.66	Grain weight	70.2	49.6707	90.7293	Li et al. 2012b
QTL1308	1A	11.00-13.00	9.4	7.05	Grain weight	22.9	10.3345	35.4655	Mir et al. 2012
QTL1309	1A	81	3.95	7.6	Grain weight	37.2	25.5438	48.8562	Mir et al. 2012
QTL1310	1A	256	17.8	23.27	Grain weight	121.95	118.143	125.757	Mir et al. 2012
QTL1311	1B	84	4.64	19.2	Grain weight	37.6	32.9861	42.2139	Mir et al. 2012
QTL1312	6A	268	18	22.7	Grain weight	54	50.0975	57.9025	Mir et al. 2012
QTL1313	6B	223	3.25	21.6	Grain weight	66.95	62.8488	71.0512	Mir et al. 2012
QTL1314	7D	103	20.14	12.41	Grain weight	77.85	70.7116	84.9884	Mir et al. 2012
QTL1315	2B	128.2	3	16	Kernel weight	80.8	78.0906	83.5094	Carter et al. 2012
QTL1316	1B	18.1	6.2	15.2	Thousand kernel weight	37.1	32.5561	41.6439	Simons et al. 2012
QTL1317	3A	38	4	19	heritability estimates of grain yield	60.9	52.5082	69.2918	Mengistu et al. 2012
QTL1318	3A	39.4	2.8	13	kernel per spike	60.9	48.635	73.165	Mengistu et al. 2012
QTL1319	3A	38	2.7	12	Spikes per square meter	60.9	47.613	74.187	Mengistu et al. 2012
QTL1320	3A	38	4.9	21	Thousand kernel weight	60.9	53.3074	68.4926	Mengistu et al. 2012
QTL1321	3A	38	5.1	23	anthesis data	60.9	53.9676	67.8324	Mengistu et al. 2012
QTL1322	2D	32.9	9.74	27.1	Harvest Index	1.55	-0.998627	4.09863	Mason et al. 2013
QTL1323	2D	32.9	4.45	10.3	Grain number per spike	1.55	-5.15561	8.25561	Mason et al. 2013
QTL1324	2D	32.9	6.78	19.7	Grain weight	1.55	-1.95598	5.05598	Mason et al. 2013
QTL1325	2D	32.9	7.45	15.2	Thousand kernel weight	1.55	-2.99393	6.09393	Mason et al. 2013
QTL1326	2D	32.9	10.43	21.9	Grain yield	1.55	-1.60378	4.70378	Mason et al. 2013
QTL1327	3B	45.4	6.87	19	Biomass	68.7	65.0649	72.3351	Mason et al. 2013
QTL1328	3B	45.4	10.43	13.5	Spike number	68.7	63.5839	73.8161	Mason et al. 2013
QTL1329	3B	45.4	3.8	7	Grain yield	68.7	58.8332	78.5668	Mason et al. 2013
QTL1330	4B	9.9	4.16	8.2	Grain number per spike	39.6	31.1771	48.0229	Mason et al. 2013
QTL1331	5A	37	4.07	7.8	Thousand kernel weight	50.3	41.4452	59.1548	Mason et al. 2013
QTL1332	5B	51.9	5.08	10.6	Harvest Index	112.4	105.884	118.916	Mason et al. 2013
QTL1333	5B	37.3	6.04	10.6	Spike number	68.5	61.9842	75.0158	Mason et al. 2013
QTL1334	5D	79.8	3.39	8	Grain yield	73.2	64.5665	81.8335	Mason et al. 2013
QTL1335	7A	75.8	5.01	9.7	Grain number per spike	104.18	97.0596	111.3	Mason et al. 2013
QTL1336	7D	116.1	3.59	8.8	Grain number per spike	160	152.151	167.849	Mason et al. 2013
QTL1337	7D	116.1	3.6	6.5	Grain yield	160	149.374	170.626	Mason et al. 2013
QTL1338	7D	0	3.51	5.7	Harvest Index	54.5	42.3828	66.6172	Mason et al. 2013
QTL1339	7D	106.8	4.79	5.3	Spike number	158.5	145.468	171.532	Mason et al. 2013
QTL1340	4A	99.46	3	10	Grain yield	108.5	103.62	113.38	Lopes et al. 2013
QTL1341	4B	14.09	3	10	Grain yield	36.3	31.4198	41.1802	Lopes et al. 2013
QTL1342	5A	48.36	3	10	Grain yield	53.6	48.7198	58.4802	Lopes et al. 2013
QTL1343	5B	7.47	3	10	Thousand kernel weight	58.1	53.2198	62.9802	Lopes et al. 2013
QTL1344	6A	62.18	3	10	Thousand kernel weight	57.6	52.7198	62.4802	Lopes et al. 2013
QTL1345	6D	36.98	3	10	Thousand kernel weight	71.7	66.8198	76.5802	Lopes et al. 2013
QTL1346	6D	41.41	3	10	Grain number	62.86	57.9798	67.7402	Lopes et al. 2013
QTL1347	1A	5	3.4	8.5	Grain number per ear	44.1	39.9312	48.2688	Jia et al. 2013
QTL1348	1B	1	3.7	13.9	Grain number per ear	#N/A	#N/A	#N/A	Jia et al. 2013
QTL1349	2A	16	3.8	7.6	Grain number per ear	92.5	87.8375	97.1625	Jia et al. 2013
QTL1350	3A	16	3	4.2	Grain weight	78.1	69.6631	86.5369	Jia et al. 2013
QTL1351	4A	5	3.8	9.4	Tiller number	83.3	79.5303	87.0697	Jia et al. 2013
QTL1352	4B	0	8.3	17.2	Grain number per ear	31.8	29.7398	33.8602	Jia et al. 2013
QTL1353	4B	0	11.7	23	Grain weight	31.8	30.2594	33.3406	Jia et al. 2013
QTL1354	4B	0	4.8	10.3	Grain number per ear	#N/A	#N/A	#N/A	Jia et al. 2013
QTL1355	4B	2	8.3	16.8	Grain number per ear	28.45	26.3408	30.5592	Jia et al. 2013
QTL1356	4B	2	3	4.2	Grain weight	28.45	20.0131	36.8869	Jia et al. 2013
QTL1357	4B	0	3.8	8.8	Spike number	44.1	40.0733	48.1267	Jia et al. 2013
QTL1358	4B	18	11.2	53.4	Grain number per ear	42.1	41.4364	42.7636	Jia et al. 2013
QTL1359	5A	0	6.4	12.9	Spike number	#N/A	#N/A	#N/A	Jia et al. 2013
QTL1360	5A	0	10.4	21.9	Grain weight	43.9	42.282	45.518	Jia et al. 2013
QTL1361	5A	0	14	30.5	Grain weight	43.9	42.7382	45.0618	Jia et al. 2013
QTL1362	5A	1	11.3	21.3	Tiller number	49.9	48.2364	51.5636	Jia et al. 2013
QTL1363	5A	1	7.1	13.7	Spike number	49.9	47.3135	52.4865	Jia et al. 2013
QTL1364	6D	8	6.3	12.9	Spike number	162.35	159.603	165.097	Jia et al. 2013
QTL1365	1A	70.40-85.40	5.33	9.3	Kernel weight	45	36.6594	53.3406	Elfeki et al. 2013
QTL1366	1B	37.80-45.90	7.32	11.7	Kernel weight	50.59	43.9603	57.2197	Elfeki et al. 2013
QTL1367	2B	78.80-83.80	10.47	19.1	Kernel weight	50.35	46.2889	54.4111	Elfeki et al. 2013
QTL1368	2D	40.70-43.20	3.08	6.2	Kernel weight	70.49	57.9791	83.0009	Elfeki et al. 2013
QTL1369	3B	11.80-14.50	4.28	6.9	Kernel weight	59.55	48.3083	70.7917	Elfeki et al. 2013
QTL1370	6A	71	10.57	18.5	Kernel weight	41.6	37.4072	45.7928	Elfeki et al. 2013
QTL1371	7D	3	3.25	5.8	Kernel weight	70.5	57.1263	83.8737	Elfeki et al. 2013
QTL1372	2A	47	3	7.5	Spike length	51.8	48.2018	55.3982	Wang et al. 2013a
QTL1373	3B	95	3	3.3	Spike length	60.1	51.9222	68.2778	Wang et al. 2013a
QTL1374	6B	187	3	11.9	Spike length	52	49.7322	54.2678	Wang et al. 2013a
QTL1375	7A	98	3	14	Spike length	77.7	75.7724	79.6276	Wang et al. 2013a
QTL1376	7B	112	3	7.4	Spike length	13.9	10.2531	17.5469	Wang et al. 2013a
QTL1377	3A	23.8	4.1	17.64	kernel per spike	16.76	11.8967	21.6233	Rustgi et al. 2013
QTL1378	3A	268.1	2.5	21.39	Spikes per square meter	75.65	71.6393	79.6607	Rustgi et al. 2013
QTL1379	3A	304	3.4	12.69	Spikes per square meter	94.28	87.5196	101.04	Rustgi et al. 2013
QTL1380	3A	307.1	3.2	18.36	Heading date	78.83	74.1574	83.5026	Rustgi et al. 2013
QTL1381	3A	316.9	2.2	18.25	Biomass	60.19	55.4892	64.8908	Rustgi et al. 2013
QTL1382	3A	21.4	4.4	19.22	Thousand kernel weight	14.44	9.97645	18.9036	Rustgi et al. 2013
QTL1383	3A	21.4	4.6	16.03	kernel per spike	14.44	9.08819	19.7918	Rustgi et al. 2013
QTL1384	3A	21.8	3.2	13.5	Heading date	14.44	8.08522	20.7948	Rustgi et al. 2013
QTL1385	3A	23.2	4.2	16	Thousand kernel weight	14.44	9.07816	19.8018	Rustgi et al. 2013
QTL1386	3A	5.4	4	15.04	kernel per spike	23.4	17.6959	29.1041	Rustgi et al. 2013
QTL1387	3A	5.3	5.7	15.5	Grain yield	23.4	17.8652	28.9348	Rustgi et al. 2013
QTL1388	3A	7.5	2.6	15.15	Spikes per square meter	23.4	17.7373	29.0627	Rustgi et al. 2013
QTL1389	3A	177	5.3	18.81	Thousand kernel weight	53.9	49.3392	58.4608	Rustgi et al. 2013
QTL1390	3A	176.6	2.5	10.59	kernel per spike	62.75	54.649	70.851	Rustgi et al. 2013
QTL1391	3A	177	5.1	19.95	Spikes per square meter	62.75	58.4498	67.0502	Rustgi et al. 2013
QTL1392	3A	87.4	3.5	19.8	Grain yield	24.2	19.8672	28.5328	Rustgi et al. 2013
QTL1393	3A	236.3	2.1	8.21	Spikes per square meter	70.8	60.3506	81.2494	Rustgi et al. 2013
QTL1394	3A	197.7	3.4	13.45	Thousand kernel weight	63.1	56.7216	69.4784	Rustgi et al. 2013
QTL1395	3A	99.7	2.7	12.47	Spikes per square meter	39.3	32.4203	46.1797	Rustgi et al. 2013
QTL1396	3A	171.4	9.6	33.98	Grain yield	56.35	53.8253	58.8747	Rustgi et al. 2013
QTL1397	3A	171.4	4.1	17.4	Spikes per square meter	56.35	51.4196	61.2804	Rustgi et al. 2013
QTL1398	3A	NA	2.2	14.73	Thousand kernel weight	41.6	35.7759	47.4241	Rustgi et al. 2013
QTL1399	3A	157.6	2.6	11.81	Grain weight per spike	63.35	56.0859	70.6141	Rustgi et al. 2013
QTL1400	3A	157.6	2.6	14.28	kernel per spike	63.35	57.3423	69.3577	Rustgi et al. 2013
QTL1401	3A	163.9	8.1	30.5	Grain yield	63.35	60.5372	66.1628	Rustgi et al. 2013
QTL1402	3A	159.8	6.4	26.03	Spikes per square meter	63.35	60.0542	66.6458	Rustgi et al. 2013
QTL1403	3A	12.8	5.6	23.69	Thousand kernel weight	26.05	22.4287	29.6713	Rustgi et al. 2013
QTL1404	3A	184.2	6.2	25.67	Spikes per square meter	67.1	63.758	70.442	Rustgi et al. 2013
QTL1405	3A	187.2	3.6	12.24	kernel per spike	67.9	60.8911	74.9089	Rustgi et al. 2013
QTL1406	3A	12.8	4.8	16.68	kernel per spike	28.9	23.7567	34.0433	Rustgi et al. 2013
QTL1407	3A	284.8	4.4	14.35	Thousand kernel weight	78.1	72.1216	84.0784	Rustgi et al. 2013
QTL1408	3A	173.9	2.4	9.12	kernel per spike	61.1	51.6933	70.5067	Rustgi et al. 2013
QTL1409	3A	173.9	3.5	15.22	Grain weight per spike	61.1	55.4634	66.7366	Rustgi et al. 2013
QTL1410	3A	173.6	8.3	29.24	Grain yield	61.1	58.166	64.034	Rustgi et al. 2013
QTL1411	2A	6	2.17	6.92	Grain yield	49.8	35.9753	63.6247	Liu et al. 2013c
QTL1412	1A	0	3.13	10.81	Grain yield	39	30.1502	47.8498	Liu et al. 2013c
QTL1413	6A	2	3.71	13.36	Grain yield	19	11.8393	26.1607	Liu et al. 2013c
QTL1414	5A	0.2	2.91	9.43	Grain yield	141.6	131.455	151.745	Liu et al. 2013c
QTL1415	1A	40.1	3.8	7	Spike number	74.145	67.8854	80.4046	Azadi et al. 2014
QTL1416	1A	8.3	3.7	9.4	Spike length	163.665	159.004	168.326	Azadi et al. 2014
QTL1417	1A	58.6	3.7	5.2	Thousand kernel weight	51.765	43.3386	60.1914	Azadi et al. 2014
QTL1418	1A	54	7	10	Grain number per spike	48.18	43.7983	52.5617	Azadi et al. 2014
QTL1419	1A	58.7	3	4.2	Grain yield	38	27.5673	48.4327	Azadi et al. 2014
QTL1420	1B	76.9	3.5	7.4	Grain number per spike	37.01	31.0888	42.9312	Azadi et al. 2014
QTL1421	2A	53	3.4	6.2	Grain yield	32.35	25.2827	39.4173	Azadi et al. 2014
QTL1422	2A	53	10.3	25.1	Grain number per spike	32.35	30.6043	34.0957	Azadi et al. 2014
QTL1423	2A	53	4.5	18	Spikelet number per spike(SPN)	32.35	29.9157	34.7843	Azadi et al. 2014
QTL1424	2B	0.1	3.7	5.3	Thousand kernel weight	24.36	16.0926	32.6274	Azadi et al. 2014
QTL1425	2B	6.6	5.8	8.1	Grain number per spike	24.36	18.9505	29.7695	Azadi et al. 2014
QTL1426	2B	6.6	3.3	5.2	Grain yield	24.36	15.9336	32.7864	Azadi et al. 2014
QTL1427	2D	40.4	3	4.3	Spike number	71.88	61.69	82.07	Azadi et al. 2014
QTL1428	2D	136.1	5.7	15.08	Biomass	71.88	68.9743	74.7857	Azadi et al. 2014
QTL1429	3A	35.9	3.3	6.41	Grain number per spike	110.82	103.984	117.656	Azadi et al. 2014
QTL1430	3B	45.3	3.1	3.3	Grain yield	60.71	47.4321	73.9879	Azadi et al. 2014
QTL1431	3B	45.3	3.7	6.1	Grain yield	60.71	53.5269	67.8931	Azadi et al. 2014
QTL1432	3B	0.3	3.1	2.9	Spike length	99.285	84.1756	114.394	Azadi et al. 2014
QTL1433	3B	138.6	10.1	11.1	Spikelet number per spike(SPN)	17.99	14.0425	21.9375	Azadi et al. 2014
QTL1434	3B	7.8	3	7.4	Grain number per spike	96.03	90.1088	101.951	Azadi et al. 2014
QTL1435	3B	7.8	4	5.4	Spike length	96.03	87.9157	104.144	Azadi et al. 2014
QTL1436	3B	7.8	4.2	8.2	Spikelet number per spike(SPN)	96.03	90.6864	101.374	Azadi et al. 2014
QTL1437	3B	92.3	3	5.1	Grain yield	122.6	114.008	131.192	Azadi et al. 2014
QTL1438	3B	94.5	3.2	9.1	Thousand kernel weight	122.6	117.785	127.415	Azadi et al. 2014
QTL1439	3B	94.5	3.7	5.1	Grain number per spike	122.6	114.008	131.192	Azadi et al. 2014
QTL1440	3B	62.2	4.9	10.4	Grain number per spike	52.39	48.1768	56.6032	Azadi et al. 2014
QTL1441	3B	62.1	5.9	10.8	Thousand kernel weight	55.7	51.6429	59.7571	Azadi et al. 2014
QTL1442	4A	179.8	3.7	4.8	Grain yield	65.84	56.7114	74.9686	Azadi et al. 2014
QTL1443	4A	193.6	3.9	5.5	Thousand kernel weight	65.07	57.1032	73.0368	Azadi et al. 2014
QTL1444	4B	34.1	6.2	14.5	Spike length	83.35	80.3281	86.3719	Azadi et al. 2014
QTL1445	4B	34.1	5.1	22.7	Spike length	83.35	81.4197	85.2803	Azadi et al. 2014
QTL1446	5A	4.1	3.5	4.4	Grain yield	41.24	31.2815	51.1985	Azadi et al. 2014
QTL1447	5A	17.8	3.7	4.1	Thousand kernel weight	41.24	30.5529	51.9271	Azadi et al. 2014
QTL1448	5B	57.5	6.6	9.2	Grain number per spike	23.485	18.7223	28.2477	Azadi et al. 2014
QTL1449	6A	25.4	3.5	5.35	Grain number per spike	5.195	-2.99513	13.3851	Azadi et al. 2014
QTL1450	6A	25.4	4.2	5.7	Spikelet number per spike(SPN)	5.195	-2.49223	12.8822	Azadi et al. 2014
QTL1451	6B	14.8	3.1	4.7	Grain yield	14.43	5.10719	23.7528	Azadi et al. 2014
QTL1452	6B	14.8	4.5	6.2	Grain number per spike	14.43	7.36271	21.4973	Azadi et al. 2014
QTL1453	6B	14.8	3.5	9.1	Grain number per spike	14.43	9.61492	19.2451	Azadi et al. 2014
QTL1454	6B	10.5	3.9	5.6	Thousand kernel weight	4.18	-3.6445	12.0045	Azadi et al. 2014
QTL1455	7A	24	3.5	5.3	Grain yield	68.07	59.8026	76.3374	Azadi et al. 2014
QTL1456	7A	2.6	3.2	4.6	Thousand kernel weight	54.09	44.5645	63.6155	Azadi et al. 2014
QTL1457	7A	23.4	3.3	7.8	Spike length	46.155	40.5374	51.7726	Azadi et al. 2014
QTL1458	7B	45	3	8	Spike length	4.82	-0.657151	10.2972	Azadi et al. 2014
QTL1459	7D	1.7	5.2	8.9	Thousand kernel weight	203.63	198.707	208.553	Azadi et al. 2014
QTL1460	1B	85.81	9.6	22	Grain yield	25	22.6701	27.3299	Zhang et al. 2014
QTL1461	3B	156.01	3.4	8	Grain yield	68.7	62.2928	75.1072	Zhang et al. 2014
QTL1462	4B	62.51	8.3	16	Grain yield	26.7	23.4964	29.9036	Zhang et al. 2014
QTL1463	5A	65.91	2.8	6	Grain yield	55.9	47.357	64.443	Zhang et al. 2014
QTL1464	1A	NA	8.2	14	Thousand kernel weight	66.56	60.2717	72.8483	Williams et al. 2014
QTL1465	4B	NA	6.1	11	Thousand kernel weight	30.97	22.9667	38.9733	Williams et al. 2014
QTL1466	5B	NA	4.2	7	Thousand kernel weight	11.51	-1.06669	24.0867	Williams et al. 2014
QTL1467	5B	NA	6.1	10	Thousand kernel weight	153.9	145.096	162.704	Williams et al. 2014
QTL1468	6A	NA	8.1	15	Thousand kernel weight	58.2	52.3309	64.0691	Williams et al. 2014
QTL1469	6D	NA	4	6	Thousand kernel weight	93.4	78.7272	108.073	Williams et al. 2014
QTL1470	7D	NA	5	12	Thousand kernel weight	71.8	64.4636	79.1364	Williams et al. 2014
QTL1471	2D	NA	3.5	7	Thousand-kernel weight	5.1	-7.63292	17.8329	Williams et al. 2014
QTL1472	7D	NA	4.4	7	Thousand-kernel weight	91.2	78.4671	103.933	Williams et al. 2014
QTL1473	2B	75.8	7.17	11.85	Spike number	99.445	95.423	103.467	Yu et al. 2014
QTL1474	5A	48.1	4.64	12.31	Kernel weight	153.13	149.258	157.002	Yu et al. 2014
QTL1475	5A	172.2	5.02	8.84	Spike length	41.035	35.6435	46.4265	Yu et al. 2014
QTL1476	6B	174.6	3.86	8.37	Spike length	1.17	-4.52424	6.86424	Yu et al. 2014
QTL1477	1B	72.6	4.93	10.19	Thousand kernel weight	29.91	25.2328	34.5872	Yu et al. 2014
QTL1478	5A	170.2	5.1	11.2	Thousand kernel weight	40.965	36.7096	45.2204	Yu et al. 2014
QTL1479	3B	85.5	3.41	7.82	Spike length	51.42	45.3253	57.5147	Yu et al. 2014
QTL1480	5A	48.1	5.13	9.18	Thousand kernel weight	153.51	148.318	158.702	Yu et al. 2014
QTL1481	1D	61.4	4.55	9.76	Spike number	60.42	55.5367	65.3033	Yu et al. 2014
QTL1482	2A	83.2	4.83	10.03	Kernel weight	79.04	74.2882	83.7918	Yu et al. 2014
QTL1483	1D	41.7	3.41	6.65	Spike number	58.715	51.548	65.882	Yu et al. 2014
QTL1484	3A	15.6	3.85	10.16	Spike length	49.78	45.089	54.471	Yu et al. 2014
QTL1485	7B	144.8	3.83	6.02	Spike number	61.41	53.4929	69.3271	Yu et al. 2014
QTL1486	7D	121.9	3.96	6.28	Spike number	26.9	19.3107	34.4893	Yu et al. 2014
QTL1487	6B	212.1	4.58	7.84	Heading date	2.31	-3.76919	8.38919	Yu et al. 2014
QTL1488	5A	48.1	5.79	8.68	Heading date	153.13	147.639	158.621	Yu et al. 2014
QTL1489	7A	4.7	5.1	7.55	Heading date	31.81	25.4973	38.1227	Yu et al. 2014
QTL1490	7A	NA	3.77	7.55	Heading date	32.26	25.9473	38.5727	Yu et al. 2014
QTL1491	2A	71.8	3.6	5	Spikelet number per spike(SPN)	51	5.70085	96.2991	Katkout et al. 2014
QTL1492	2B	64.8	10.8	13	Spikelet number per spike(SPN)	57.1	39.6773	74.5227	Katkout et al. 2014
QTL1493	4A	44	11.6	17	Spikelet number per spike(SPN)	63.2	49.8767	76.5233	Katkout et al. 2014
QTL1494	2D	12	4.2	18	Spike length	5.1	-7.4831	17.6831	Katkout et al. 2014
QTL1495	5D	65.2	3.9	17	Spike length	48.2	34.8767	61.5233	Katkout et al. 2014
QTL1496	4A	44	5.1	27	Compactness	63.2	54.8113	71.5887	Katkout et al. 2014
QTL1497	5A	90	2.9	6	Compactness	78.4	40.6507	116.149	Katkout et al. 2014
QTL1498	5D	65.2	5.5	23	Compactness	48.2	38.3524	58.0476	Katkout et al. 2014
QTL1499	2B	68.2	2.8	12	Threshability	63.2	44.3254	82.0746	Katkout et al. 2014
QTL1500	2D	15.5	4.7	22	Threshability	0	-10.2953	10.2953	Katkout et al. 2014
QTL1501	4D	0	2.6	13	Threshability	27.2	9.77725	44.6227	Katkout et al. 2014
QTL1502	5D	16.8	3.8	3	Threshability	8.6	-66.8986	84.0986	Katkout et al. 2014
QTL1503	2D	109.3	3.4	14	Rachis fragility	19.7	3.52173	35.8783	Katkout et al. 2014
QTL1504	3D	122.9	3.3	16	Rachis fragility	43.5	29.344	57.656	Katkout et al. 2014
QTL1505	4D	6	6.5	35	Rachis fragility	31.8	25.3287	38.2713	Katkout et al. 2014
QTL1506	5A	233	6.7	10	Grain yield	51.555	47.5794	55.5306	Maphosa et al. 2014
QTL1507	5A	233	7.3	10	Grain number per square meter	51.555	47.5794	55.5306	Maphosa et al. 2014
QTL1508	3B	24	4.5	10	Thousand grain weight (g)	31.985	28.0094	35.9606	Maphosa et al. 2014
QTL1509	2D	139	7.2	10	Thousand grain weight (g)	10	6.02439	13.9756	Maphosa et al. 2014
QTL1510	2D	52	15.5	10	Grain yield	39.33	35.3544	43.3056	Maphosa et al. 2014
QTL1511	2B	100	12.6	10	Grain yield	94.42	90.4444	98.3956	Maphosa et al. 2014
QTL1512	6A	2	7.5	10	Grain yield	49.94	45.9644	53.9156	Maphosa et al. 2014
QTL1513	3B	301	12.5	10	Grain yield	132.76	128.784	136.736	Maphosa et al. 2014
QTL1514	2B	220	3.6	10	Grain yield	109.79	105.814	113.766	Maphosa et al. 2014
QTL1515	3A	229	4.1	10	Grain yield	61.3	57.3244	65.2756	Maphosa et al. 2014
QTL1516	2A	163	5.3	10	Grain yield	20.3	16.3244	24.2756	Maphosa et al. 2014
QTL1517	2B	100	3	10	Grain number per square meter	94.42	90.4444	98.3956	Maphosa et al. 2014
QTL1518	2B	17	4.4	10	Grain number per square meter	9.97	5.99439	13.9456	Maphosa et al. 2014
QTL1519	2D	52	21.4	10	Thousand grain weight (g)	39.33	35.3544	43.3056	Maphosa et al. 2014
QTL1520	2B	100	7.5	10	Thousand grain weight (g)	94.42	90.4444	98.3956	Maphosa et al. 2014
QTL1521	4A	145	3.6	10	Thousand grain weight (g)	65.8	61.8244	69.7756	Maphosa et al. 2014
QTL1522	6A	2	4.3	10	Thousand grain weight (g)	49.94	45.9644	53.9156	Maphosa et al. 2014
QTL1523	3B	289	5.7	10	Thousand grain weight (g)	129.43	125.454	133.406	Maphosa et al. 2014
QTL1524	2D	52	65	10	Time from sowing to ear emergence (d)	39.33	35.3544	43.3056	Maphosa et al. 2014
QTL1525	5A	260	8.2	10	Time from sowing to ear emergence (d)	64.16	60.1844	68.1356	Maphosa et al. 2014
QTL1526	5D	NA	5.4	10	Time from sowing to ear emergence (d)	114.82	110.844	118.796	Maphosa et al. 2014
QTL1527	2B	117	22.4	10	Time from sowing to ear emergence (d)	57.1	53.1244	61.0756	Maphosa et al. 2014
QTL1528	3A	228.3	6.98	10.9	Grain number per spike	122.8	119.761	125.839	Gao et al. 2015
QTL1529	3B	166	5.21	8.8	Grain number per spike	120.78	117.015	124.545	Gao et al. 2015
QTL1530	6B	178	3.84	5	Grain number per spike	82.59	75.964	89.216	Gao et al. 2015
QTL1531	1A	47.5	15.09	17.2	Grain number per spike	65.81	63.8838	67.7362	Gao et al. 2015
QTL1532	5A	220	3.35	4.5	Grain number per spike	74.5	67.1378	81.8622	Gao et al. 2015
QTL1533	5A	183	5.12	6	Grain number per spike	58.19	52.6683	63.7117	Gao et al. 2015
QTL1534	7A	172	2.86	6.5	Grain number per spike	102.72	97.6231	107.817	Gao et al. 2015
QTL1535	5B	9	2.92	4.3	Spike number	6.96	-0.74467	14.6647	Gao et al. 2015
QTL1536	7B	18	3.02	4.6	Grain number per spike	22.815	15.6128	30.0172	Gao et al. 2015
QTL1537	6A	75	6.33	5.8	Spike number	50.26	44.5479	55.9721	Gao et al. 2015
QTL1538	4B	100	3.7	4.7	Grain number per spike	76.495	69.446	83.544	Gao et al. 2015
QTL1539	2B	92	4.88	6.1	Grain number per spike	93	87.5688	98.4312	Gao et al. 2015
QTL1540	2B	35	3.63	6.7	Spike number	103.735	98.7902	108.68	Gao et al. 2015
QTL1541	2D	1	4.44	5.3	Thousand kernel weight	71.19	64.939	77.441	Gao et al. 2015
QTL1542	5A	44.5	2.9	3.5	Thousand kernel weight	39.2	29.7343	48.6657	Gao et al. 2015
QTL1543	4B	24	2.69	3.3	Thousand kernel weight	28.415	18.3756	38.4544	Gao et al. 2015
QTL1544	1B	43	4.13	7.5	Grain number per spike	29.93	25.5127	34.3473	Gao et al. 2015
QTL1545	2A	126	3.91	5.6	Spike number	77.69	71.7739	83.6061	Gao et al. 2015
QTL1546	1A	125	4.33	5.1	Thousand kernel weight	90.725	84.2289	97.2211	Gao et al. 2015
QTL1547	5B	61	6.54	8.2	Thousand kernel weight	11.81	7.76975	15.8503	Gao et al. 2015
QTL1548	4A	139	10.93	11.8	Grain number per spike	56.31	53.5024	59.1176	Gao et al. 2015
QTL1549	4A	141	5.83	6.6	Thousand kernel weight	57.19	52.1703	62.2097	Gao et al. 2015
QTL1550	2D	29	2.62	5.3	Grain number per spike	69.945	63.694	76.196	Gao et al. 2015
QTL1551	2D	65	3.38	4.5	Thousand kernel weight	71.88	64.5178	79.2422	Gao et al. 2015
QTL1552	2B	12	3.45	4.4	Grain number per spike	105.965	98.4354	113.495	Gao et al. 2015
QTL1553	7B	131	5.22	5.5	Thousand kernel weight	76.685	70.6613	82.7087	Gao et al. 2015
QTL1554	3A	141	9	11.7	Spike number	56.805	53.9734	59.6366	Gao et al. 2015
QTL1555	1B	122	2.62	3.4	Spike number	76.39	66.6459	86.1341	Gao et al. 2015
QTL1556	1B	66	3.03	2.3	Spike number	45.75	31.3456	60.1544	Gao et al. 2015
QTL1557	3A	113	2.95	3.8	Spike number	53.33	44.6116	62.0484	Gao et al. 2015
QTL1558	7A	170	3.39	6.4	Spike number	86.39	81.2134	91.5666	Gao et al. 2015
QTL1559	6A	73.5	9.3	10.3	Thousand kernel weight	49.11	45.8935	52.3265	Gao et al. 2015
QTL1560	4A	0.01-9.91	5.4	12.53	Kernels per spike (KS)	58.39	54.3996	62.3804	Echeverry-Solarte et al. 2015
QTL1561	6A	43.61	4.1	5.62	Number of nodes with immature spikelets (NdISk) at the spike base	5.73	-3.1668	14.6268	Echeverry-Solarte et al. 2015
QTL1562	4A	83.71	5.07	17.8	Spike length (SL)	97.675	94.866	100.484	Echeverry-Solarte et al. 2015
QTL1563	4B	29.61-31.01	3.92	4.5	Number of nodes (Nd)	47.375	36.2639	58.4861	Echeverry-Solarte et al. 2015
QTL1564	3B	108.91	3.01	6.87	Penetrance of clavate architecture (PC)	61.445	54.167	68.723	Echeverry-Solarte et al. 2015
QTL1565	3B	77.21	5.41	11.52	Penetrance of clavate architecture (PC)	173.21	168.87	177.55	Echeverry-Solarte et al. 2015
QTL1566	3A	86.41	5.3	10.92	Number spikes m–2 (NS)	14.66	10.0812	19.2388	Echeverry-Solarte et al. 2015
QTL1567	6B	0.01-1.01	3.81	9.12	Penetrance of clavate architecture (PC)	82.14	76.6575	87.6225	Echeverry-Solarte et al. 2015
QTL1568	7A	68.21	5.04	8.6	Node density (NdD)	131.115	125.301	136.929	Echeverry-Solarte et al. 2015
QTL1569	7A	0.01	4.16	9.19	Kernels per node (KNd)	86.53	81.0893	91.9707	Echeverry-Solarte et al. 2015
QTL1570	6B	139.41	4.02	6.1	Grain yield (GY)	36.125	27.9283	44.3217	Echeverry-Solarte et al. 2015
QTL1571	7B	101.31	4.34	5.18	Kernels per spikelet (KS)	77.475	67.8225	87.1275	Echeverry-Solarte et al. 2015
QTL1572	4A	90.01-124.21	4.28	9.6	Penetrance of clavate architecture (PC)	99.825	94.6167	105.033	Echeverry-Solarte et al. 2015
QTL1573	5B	238.11	3.73	8.23	Number spikes m–2 (NS)	68.79	62.7147	74.8653	Echeverry-Solarte et al. 2015
QTL1574	2A	131.41	3.88	10.45	Number of nodes with immature spikelets (NdISk) at the spike base	26.58	21.7953	31.3647	Echeverry-Solarte et al. 2015
QTL1575	2B	22.01	3.95	6.23	Number of nodes with immature spikelets (NdISk) at the spike base	139.705	131.679	147.731	Echeverry-Solarte et al. 2015
QTL1576	2B	22.01	6.75	13.48	Kernels per spikelet (KS)	139.705	135.996	143.414	Echeverry-Solarte et al. 2015
QTL1577	1B	79.51	4.73	9.76	Kernels per spikelet (KS)	68.455	63.332	73.578	Echeverry-Solarte et al. 2015
QTL1578	7A	40.91	4.01	6.6	Node density (NdD)	123.23	115.654	130.806	Echeverry-Solarte et al. 2015
QTL1579	5B	17.81	4.36	9.52	Number spikes m–2 (NS)	7.045	1.7929	12.2971	Echeverry-Solarte et al. 2015
QTL1580	5B	155.81	3.37	10.34	Penetrance of clavate architecture (PC)	31.445	26.6094	36.2806	Echeverry-Solarte et al. 2015
QTL1581	5B	133.31	3.78	7.9	Node density (NdD)	26.695	20.3659	33.0241	Echeverry-Solarte et al. 2015
QTL1582	2A	102.81	4.52	12.32	Kernels per spike (KS)	12.27	8.21156	16.3284	Echeverry-Solarte et al. 2015
QTL1583	1A	117.11-119.11	5.17	11.63	Number spikes m–2 (NS)	65.815	61.5158	70.1142	Echeverry-Solarte et al. 2015
QTL1584	1A	95.91	4.69	8	Spike length (SL)	66.525	60.275	72.775	Echeverry-Solarte et al. 2015
QTL1585	6B	67.71-75.11	3.47	5.7	Number of nodes with immature spikelets (NdISk) at the spike base	15.4	6.62807	24.1719	Echeverry-Solarte et al. 2015
QTL1586	1A	16.41-20.61	4.04	8.88	Kernels per spike (KS)	27.19	21.5594	32.8206	Echeverry-Solarte et al. 2015
QTL1587	1A	14.01-26.61	7.87	14.9	Spike length (SL)	34.815	31.4593	38.1707	Echeverry-Solarte et al. 2015
QTL1588	5B	183.71	4.42	12.95	Kernels per node (KNd)	44.64	40.779	48.501	Echeverry-Solarte et al. 2015
QTL1589	3B	134.61	3.72	6.81	Number spikes m–2 (NS)	66.905	59.5629	74.2471	Echeverry-Solarte et al. 2015
QTL1590	4B	3.01	3.36	9.04	Number spikes m–2 (NS)	50.16	44.629	55.691	Echeverry-Solarte et al. 2015
QTL1591	1A	15.41	4.58	8	Grain yield (GY)	10.45	4.2	16.7	Echeverry-Solarte et al. 2015
QTL1592	3A	3.61	3.47	4.6	Grain yield (GY)	0.89	-9.97957	11.7596	Echeverry-Solarte et al. 2015
QTL1593	5B	221.71	4.35	10.12	Penetrance of clavate architecture (PC)	67.075	62.1343	72.0157	Echeverry-Solarte et al. 2015
QTL1594	2A	113.51	3.55	6.86	Grain yield (GY)	23.855	16.5664	31.1436	Echeverry-Solarte et al. 2015
QTL1595	5A	20.01-23.21	8.07	15.58	Number spikes m–2 (NS)	39.78	36.5708	42.9892	Echeverry-Solarte et al. 2015
QTL1596	1B	22.51	5.37	11.67	Penetrance of clavate architecture (PC)	36.75	32.4655	41.0345	Echeverry-Solarte et al. 2015
QTL1597	7A	6.81	6.72	20.59	Number spikes m–2 (NS)	32.335	29.9066	34.7634	Echeverry-Solarte et al. 2015
QTL1598	5B	251.81	3.61	7.76	Number spikes m–2 (NS)	66.69	60.2467	73.1333	Echeverry-Solarte et al. 2015
QTL1599	1A	106.91-113.91	4.59	6.1	Number of nodes (Nd)	61.925	53.7283	70.1217	Echeverry-Solarte et al. 2015
QTL1600	1A	106.91-113.91	4.37	11.31	Kernels per node (KNd)	61.925	57.5041	66.3459	Echeverry-Solarte et al. 2015
QTL1601	1A	14.01	4.26	6.7	Number of nodes (Nd)	31.48	24.0173	38.9427	Echeverry-Solarte et al. 2015
QTL1602	1A	106.91	5.36	12.63	Number of nodes with immature spikelets (NdISk) at the spike base	63.16	59.2012	67.1188	Echeverry-Solarte et al. 2015
QTL1603	1D	90.51	3.6	8.5	Grain yield (GY)	75.23	69.3476	81.1124	Echeverry-Solarte et al. 2015
QTL1604	1D	90.51	3.45	8.17	Number spikes m–2 (NS)	75.23	69.11	81.35	Echeverry-Solarte et al. 2015
QTL1605	2B	48.21	3.45	5.2	Number of nodes (Nd)	146.32	136.705	155.935	Echeverry-Solarte et al. 2015
QTL1606	2B	23.01	3.52	5.14	Number of nodes with immature spikelets (NdISk) at the spike base	47.72	37.9924	57.4476	Echeverry-Solarte et al. 2015
QTL1607	2B	2.01	5.41	9.8	Spike length (SL)	131.59	126.488	136.692	Echeverry-Solarte et al. 2015
QTL1608	2B	2.01	6.27	13.09	Kernels per node (KNd)	131.59	127.77	135.41	Echeverry-Solarte et al. 2015
QTL1609	2D	89.71	20.03	40.34	Grain yield (GY)	71.88	70.6405	73.1195	Echeverry-Solarte et al. 2015
QTL1610	3D	17.81	2.71	5.54	Number spikes m–2 (NS)	4.7	-4.32527	13.7253	Echeverry-Solarte et al. 2015
QTL1611	4A	6.91	4.32	4.1	Number of nodes (Nd)	58.39	46.1949	70.5851	Echeverry-Solarte et al. 2015
QTL1612	4A	6.91	3.22	7.63	Kernels per node (KNd)	58.39	51.8369	64.9431	Echeverry-Solarte et al. 2015
QTL1613	4B	31.01	7.34	14.9	Spike length (SL)	44.09	40.7343	47.4457	Echeverry-Solarte et al. 2015
QTL1614	6B	7.51	4.02	7.06	Kernels per spikelet (KS)	82.39	75.3078	89.4722	Echeverry-Solarte et al. 2015
QTL1615	6B	21.81	3.07	8.94	Kernels per node (KNd)	79.22	73.6272	84.8128	Echeverry-Solarte et al. 2015
QTL1616	7B	123.71	3.73	6.6	Node density (NdD)	78.19	70.6142	85.7658	Echeverry-Solarte et al. 2015
QTL1617	1B	111.1	3.89	4.62	Kernel weight	32.205	22.5123	41.8977	Li et al. 2015c
QTL1618	1B	113.1	3.59	3.03	Thousand kernel weight	32.205	17.426	46.984	Li et al. 2015c
QTL1619	4B	99.1	5.87	14.34	Kernel weight	49.96	46.8373	53.0827	Li et al. 2015c
QTL1620	4B	99.1	5.02	9.82	Thousand kernel weight	49.96	45.3999	54.5201	Li et al. 2015c
QTL1621	5B	115.7	5.29	9.89	Thousand kernel weight	19.16	14.6322	23.6878	Li et al. 2015c
QTL1622	5B	97.8	4.87	10.8	Kernel weight	14.27	10.1237	18.4163	Li et al. 2015c
QTL1623	5B	95.8	5.28	10.57	Thousand kernel weight	14.27	10.0335	18.5065	Li et al. 2015c
QTL1624	3D	236.2	6.83	7.61	Kernel weight	40.9	35.0156	46.7844	Li et al. 2015c
QTL1625	6B	8.4	4.78	5.25	Kernel weight	63.15	54.6204	71.6796	Li et al. 2015c
QTL1626	6A	131.2	5.64	11.64	Thousand kernel weight	5.83	1.9829	9.6771	Li et al. 2015c
QTL1627	5A	48.6	5.45	4.15	Thousand kernel weight	41.24	30.4496	52.0304	Li et al. 2015c
QTL1628	5A	125.9	4.06	3.94	Thousand kernel weight	54.4	43.0345	65.7655	Li et al. 2015c
QTL1629	6A	#REF!	3.6	11.2	Thousand kernel weight (Thousand kernel weight, g)	42.06	36.3302	47.7898	Li et al. 2015a
QTL1630	5A	#N/A	4.4	16.2	Grain yield	39.2	35.2387	43.1613	Li et al. 2015a
QTL1631	4B	#N/A	4.3	14	Kernel number per spike	38.86	34.2762	43.4438	Li et al. 2015a
QTL1632	4B	#N/A	4.7	14.4	Thousand kernel weight (Thousand kernel weight, g)	38.86	34.4035	43.3165	Li et al. 2015a
QTL1633	2D	#N/A	11.8	19.2	Thousand kernel weight (Thousand kernel weight, g)	70.5	67.1576	73.8424	Li et al. 2015a
QTL1634	4A	#N/A	4.5	11.7	Grain yield	54.49	49.0051	59.9749	Li et al. 2015a
QTL1635	5A	#N/A	8.3	24.7	Grain yield	76.19	73.5919	78.7881	Li et al. 2015a
QTL1636	7A	#N/A	8	19.9	Kernel number per spike	97.11	93.8852	100.335	Li et al. 2015a
QTL1637	7A	#N/A	7.7	10.9	Thousand kernel weight (Thousand kernel weight, g)	97.11	91.2225	102.997	Li et al. 2015a
QTL1638	5A	#N/A	3.9	9.8	Kernel number per spike	80.01	73.4617	86.5583	Li et al. 2015a
QTL1639	6A	#N/A	4.5	11.1	Grain yield	46.21	40.4286	51.9914	Li et al. 2015a
QTL1640	6A	#N/A	4.1	9.7	Kernel number per spike	46.21	39.5942	52.8258	Li et al. 2015a
QTL1641	7A	#N/A	4.4	14.8	Thousand kernel weight (Thousand kernel weight, g)	105.41	101.074	109.746	Li et al. 2015a
QTL1642	7A	#N/A	8	21.9	Kernel number per spike	100.71	97.7797	103.64	Li et al. 2015a
QTL1643	7A	#N/A	12	13.6	Thousand kernel weight (Thousand kernel weight, g)	100.71	95.9914	105.429	Li et al. 2015a
QTL1644	6A	#N/A	4.8	4.6	Thousand kernel weight (Thousand kernel weight, g)	49.8	35.8493	63.7507	Li et al. 2015a
QTL1645	5A	#N/A	3.9	10.3	Kernel number per spike	80.01	73.7796	86.2404	Li et al. 2015a
QTL1646	5A	#N/A	5.2	4.8	Thousand kernel weight (Thousand kernel weight, g)	80.01	66.6406	93.3794	Li et al. 2015a
QTL1647	7A	192	5.6	21.1	Grain yield	72.1	69.0586	75.1414	Li et al. 2015a
QTL1648	5A	126	5	14.5	Grain yield	49.85	45.4243	54.2757	Li et al. 2015a
QTL1649	4B	#N/A	6.3	14.5	Kernel number per spike	24.95	20.5243	29.3757	Li et al. 2015a
QTL1650	6A	73	3.8	12.5	Grain yield	59.6	54.4661	64.7339	Li et al. 2015a
QTL1651	7A	32	4.1	5.4	Thousand kernel weight (Thousand kernel weight, g)	120.2	108.316	132.084	Li et al. 2015a
QTL1652	5A	128	4.9	6.5	Thousand kernel weight (Thousand kernel weight, g)	62.7	52.8272	72.5728	Li et al. 2015a
QTL1653	2A	15	4.7	15.1	Thousand kernel weight (Thousand kernel weight, g)	61	56.7501	65.2499	Li et al. 2015a
QTL1654	7A	90	5	13	Thousand kernel weight (Thousand kernel weight, g)	101.6	96.6636	106.536	Li et al. 2015a
QTL1655	3D	6	4.3	4.2	Thousand kernel weight (Thousand kernel weight, g)	43.5	28.2207	58.7793	Li et al. 2015a
QTL1656	7D	#N/A	3.9	3.6	Thousand kernel weight (Thousand kernel weight, g)	110.45	92.6241	128.276	Li et al. 2015a
QTL1657	2D	105	4.1	10.5	Grain yield	5.1	-1.01174	11.2117	Li et al. 2015a
QTL1658	3B	27	4.8	11.4	Kernel number per spike	12.2	6.57077	17.8292	Li et al. 2015a
QTL1659	1B	NA	3	5.2	Kernel number	32.73	24.3933	41.0667	Fan et al. 2015
QTL1660	1B	NA	3	7.75	Spike number	29.9	24.3063	35.4937	Fan et al. 2015
QTL1661	1B	NA	3	6.25	Spike number	25.575	18.6388	32.5112	Fan et al. 2015
QTL1662	7D	NA	3	15.81	Spike number	68.71	65.968	71.452	Fan et al. 2015
QTL1663	5B	NA	3	5.81	Kernel number	133.65	126.189	141.111	Fan et al. 2015
QTL1664	1B	NA	3	2.37	Spike number	33.1	14.8084	51.3916	Fan et al. 2015
QTL1665	4B	NA	3	21.17	Kernel number	6.64	4.59224	8.68776	Fan et al. 2015
QTL1666	4A	NA	3	12.33	Kernel number	56	52.4841	59.5159	Fan et al. 2015
QTL1667	4B	NA	3	8.79	Grain weight	44.28	39.3481	49.2119	Fan et al. 2015
QTL1668	4B	NA	3	10.95	Spike length	29.3	25.341	33.259	Fan et al. 2015
QTL1669	4B	NA	3	9.78	Spike number	44.28	39.8474	48.7126	Fan et al. 2015
QTL1670	4A	NA	3	9.14	Spike number	56	51.257	60.743	Fan et al. 2015
QTL1671	2D	NA	3	4.07	Spike number	9.9	-0.751367	20.5514	Fan et al. 2015
QTL1672	5A	#REF!	5.13	6.25	Thousand grain weight	39.2	34.3343	44.0657	Wu et al. 2015a
QTL1673	5A	#N/A	4.57	4.32	Thousand grain weight	39.2	32.1605	46.2395	Wu et al. 2015a
QTL1674	5A	#N/A	4.42	7.28	Grain weight	50.35	46.1727	54.5273	Wu et al. 2015a
QTL1675	5A	#N/A	4.88	7.77	Thousand grain weight	50.35	46.4362	54.2638	Wu et al. 2015a
QTL1676	5A	#N/A	6.82	11.03	Grain weight	162.655	159.898	165.412	Wu et al. 2015a
QTL1677	5A	#N/A	5.92	8.63	Grain weight	49.95	46.4262	53.4738	Wu et al. 2015a
QTL1678	5A	#N/A	4.61	6.27	Thousand grain weight	49.95	45.0998	54.8002	Wu et al. 2015a
QTL1679	5A	27	3.3	4.39	Grain weight	39.2	32.2728	46.1272	Wu et al. 2015a
QTL1680	5A	55	9.13	12.03	Grain weight	52.1	49.5721	54.6279	Wu et al. 2015a
QTL1681	5A	44	7.89	12.3	Grain weight	49.6	47.1276	52.0724	Wu et al. 2015a
QTL1682	5A	33	3.59	5.26	Thousand grain weight	39.2	33.4185	44.9815	Wu et al. 2015a
QTL1683	5A	44	4.29	6.38	Thousand grain weight	49.6	44.8335	54.3665	Wu et al. 2015a
QTL1684	7B	70.8	3.54	20.8	Final grain weight	63.6	61.8663	65.3337	Xie et al. 2015
QTL1685	7B	217.5	3.56	20.9	Final grain weight	139	137.275	140.725	Xie et al. 2015
QTL1686	7D	163.4	3.37	13.2	Final grain weight	89.7	86.968	92.432	Xie et al. 2015
QTL1687	7B	207.8	3.75	21.9	Final grain weight	136	134.353	137.647	Xie et al. 2015
QTL1688	4A	27.2	5.8	31.7	Final grain weight	41.7	40.5624	42.8376	Xie et al. 2015
QTL1689	5A	213.5	8.7	30.5	Final grain weight	90.8	89.6176	91.9824	Xie et al. 2015
QTL1690	7B	15.6	3.28	12.8	Final grain weight	46	43.1827	48.8173	Xie et al. 2015
QTL1691	7A	2.00-9.00	3	6.5	biomass yield per plant	100.705	93.7003	107.71	Narjesi et al. 2015
QTL1692	2A	35.00-45.00	4	12.4	Spike weight	29.7	26.0282	33.3718	Narjesi et al. 2015
QTL1693	2A	35.00-45.00	3	9.5	Grain weight per ear	29.7	24.9073	34.4927	Narjesi et al. 2015
QTL1694	6B	11.00-15.00	6	6.5	Spike weight	39.57	32.5653	46.5747	Narjesi et al. 2015
QTL1695	6B	11.00-15.00	3	9	Grain number per ear	39.57	34.511	44.629	Narjesi et al. 2015
QTL1696	6B	11.00-15.00	3.2	5.5	Grain weight per ear	39.57	31.2917	47.8483	Narjesi et al. 2015
QTL1697	6B	11.00-15.00	3.1	10.5	Grain yield	39.57	35.2337	43.9063	Narjesi et al. 2015
QTL1698	5D	8.00-18.00	5.2	12.4	Grain yield	71.965	68.2932	75.6368	Narjesi et al. 2015
QTL1699	2B	16	3.1	9	biomass yield per plant	109.69	104.631	114.749	Narjesi et al. 2015
QTL1700	2B	1	3.6	13.7	Spike length	147.52	144.197	150.843	Narjesi et al. 2015
QTL1701	5B	NA	3.3	8.6	Spike length	11.51	6.21573	16.8043	Narjesi et al. 2015
QTL1702	5D	8	3.2	8.5	Grain number per ear	98.73	93.3734	104.087	Narjesi et al. 2015
QTL1703	2B	16	3	13	Grain number per ear	109.69	106.188	113.192	Narjesi et al. 2015
QTL1704	3B	18	3.3	6	Grain number per ear	74.8	67.2115	82.3885	Narjesi et al. 2015
QTL1705	2A	29	4.4	12.7	Grain number per ear	30.3	26.7149	33.8851	Narjesi et al. 2015
QTL1706	2B	16	3.5	11	Grain weight per ear	109.69	105.551	113.829	Narjesi et al. 2015
QTL1707	2B	16	3.3	7.2	Grain yield	109.69	103.366	116.014	Narjesi et al. 2015
QTL1708	2B	28	3.1	7.6	Grain yield	105.51	99.5191	111.501	Narjesi et al. 2015
QTL1709	1B	23	4	10.5	Mature date	74.39	70.0537	78.7263	Narjesi et al. 2015
QTL1710	1A	2.00-14.00	3.2	9.2	Heading date	62.995	58.046	67.944	Narjesi et al. 2015
QTL1711	2B	16	3.7	12	Heading date	109.69	105.896	113.484	Narjesi et al. 2015
QTL1712	2B	43	5	11.7	Heading date	48.2	44.3085	52.0915	Narjesi et al. 2015
QTL1713	5D	0.00-8.60	2.84	5.01	Thousand kernel weight	3.4	-5.25291	12.0529	Cui et al. 2016
QTL1714	4A	115.60-151.30	4.81	8.87	Thousand kernel weight	60.2	55.3126	65.0874	Cui et al. 2016
QTL1715	2D	197.9	5.58	10.16	Thousand kernel weight	19.7	15.4332	23.9668	Cui et al. 2016
QTL1716	4B	75	7.99	13.85	Thousand kernel weight	26.7	23.57	29.83	Cui et al. 2016
QTL1717	6A	131.3	2.42	4.15	Thousand kernel weight	69.2	58.754	79.646	Cui et al. 2016
QTL1718	2B	97.87--103.39	4.7	5.8	Grain yield	112.73	108.573	116.887	Milner et al. 2016
QTL1719	7A	110.88	7.1	8.8	Grain yield	86.17	83.43	88.91	Milner et al. 2016
QTL1720	2B	127.51	3.8	5.3	Grain yield	112.24	107.69	116.79	Milner et al. 2016
QTL1721	7A	60.74	5.4	7.2	Grain yield	65.75	62.4011	69.0989	Milner et al. 2016
QTL1722	1B	#REF!	7.6	10.2	SKCS-kernel weight (SKW)	34.755	28.4635	41.0465	Li et al. 2016a
QTL1723	7A	#N/A	5.6	14.2	SKCS-kernel weight (SKW)	103.06	98.5408	107.579	Li et al. 2016a
QTL1724	7A	#N/A	8.2	20.6	SKCS-kernel weight (SKW)	98.91	95.7948	102.025	Li et al. 2016a
QTL1725	6A	#N/A	6.9	9.5	SKCS-kernel weight (SKW)	55.42	48.6649	62.1751	Li et al. 2016a
QTL1726	5A	#N/A	8	11.1	SKCS-kernel weight (SKW)	80.01	74.2286	85.7914	Li et al. 2016a
QTL1727	1B	35	5	11.7	SKCS-kernel weight (SKW)	25.1	19.6151	30.5849	Li et al. 2016a
QTL1728	7D	#N/A	3.9	4.8	SKCS-kernel weight (SKW)	110.45	97.0806	123.819	Li et al. 2016a
QTL1729	1B	#N/A	5.7	13.8	SKCS-kernel weight (SKW)	53.085	48.4348	57.7352	Li et al. 2016a
QTL1730	2D	#N/A	7.8	12	SKCS-kernel weight (SKW)	45.1	39.7522	50.4478	Li et al. 2016a
QTL1731	4B	NA	9.3	13	SKCS-kernel weight (SKW)	49.91	44.9736	54.8464	Li et al. 2016a
QTL1732	4B	#N/A	9.7	27.6	SKCS-kernel weight (SKW)	38.86	36.5349	41.1851	Li et al. 2016a
QTL1733	6A	#N/A	4.1	9.6	SKCS-kernel weight (SKW)	49.37	42.6853	56.0547	Li et al. 2016a
QTL1734	7A	#N/A	15.2	25.3	SKCS-kernel weight (SKW)	97.11	94.5735	99.6465	Li et al. 2016a
QTL1735	6A	#N/A	3.7	4.9	SKCS-kernel weight (SKW)	49.8	36.7034	62.8966	Li et al. 2016a
QTL1736	6B	#N/A	3.9	12.9	SKCS-kernel weight (SKW)	52	47.0253	56.9747	Li et al. 2016a
QTL1737	5A	#N/A	6.1	8.5	SKCS-kernel weight (SKW)	73.3	65.7502	80.8498	Li et al. 2016a
QTL1738	7A	NA	9.84	19.73	Thousand kernel weight	97.26	94.0074	100.513	Su et al. 2016
QTL1739	5B	33.80-35.70	3.7	7.7	Grain yield	11.84	5.141	18.539	Perez-Lara et al. 2016
QTL1740	2D	0.00-14.80	4.3	8.6	Grain yield	40.535	34.5371	46.5329	Perez-Lara et al. 2016
QTL1741	7A	42.40-44.20	3.1	8.8	Maturity (days)	61.345	55.4834	67.2066	Perez-Lara et al. 2016
QTL1742	7A	10.60-15.10	3	9.1	Maturity (DD)	41.725	36.0566	47.3934	Perez-Lara et al. 2016
QTL1743	4D	45.00-57.60	5.7	16	Maturity (DD)	41.17	37.9461	44.3939	Perez-Lara et al. 2016
QTL1744	2D	0.00-14.80	3.1	11.2	Maturity (days)	40.535	35.9294	45.1406	Perez-Lara et al. 2016
QTL1745	2D	0.00-14.80	3.9	10.4	Maturity (DD)	40.535	35.5752	45.4948	Perez-Lara et al. 2016
QTL1746	4A	51.80-53.20	3.5	6.5	Maturity (days)	38.62	30.6843	46.5557	Perez-Lara et al. 2016
QTL1747	4D	42.5	4.9	13.4	Maturity (days)	36.54	32.6906	40.3894	Perez-Lara et al. 2016
QTL1748	7A	42.4	5.7	16.2	Maturity (DD)	60.02	56.8359	63.2041	Perez-Lara et al. 2016
QTL1749	4A	41.5	3.1	12	Maturity (DD)	38.42	34.1215	42.7185	Perez-Lara et al. 2016
QTL1750	3B	93.60-94.80	5.8	13.5	Flowering (days)	66.42	62.5991	70.2409	Perez-Lara et al. 2016
QTL1751	3B	93.60-94.80	6.7	10.7	Flowering (DD)	66.42	61.5992	71.2408	Perez-Lara et al. 2016
QTL1752	5B	43.00-45.10	5	12.3	Flowering (days)	13.445	9.25132	17.6387	Perez-Lara et al. 2016
QTL1753	6B	100.40-118.30	3.1	6.7	Flowering (days)	46.405	38.7062	54.1038	Perez-Lara et al. 2016
QTL1754	6B	100.40-118.30	3.4	9.3	Flowering (DD)	46.405	40.8585	51.9515	Perez-Lara et al. 2016
QTL1755	2D	0.00-14.80	16.3	36.6	Flowering (days)	40.535	39.1256	41.9444	Perez-Lara et al. 2016
QTL1756	2D	0.00-14.80	7.8	25.4	Flowering (DD)	40.535	38.5042	42.5658	Perez-Lara et al. 2016
QTL1757	7A	8.60-9.40	4.7	12.7	Flowering (days)	39.24	35.1784	43.3016	Perez-Lara et al. 2016
QTL1758	7A	8.60-9.40	6.4	15.6	Flowering (DD)	39.24	35.9334	42.5466	Perez-Lara et al. 2016
QTL1759	5A	252.60-253.10	3.7	7.5	Flowering (DD)	50.8	43.9224	57.6776	Perez-Lara et al. 2016
QTL1760	6B	58.40-59.30	4.2	10	Flowering (days)	40.165	35.0068	45.3232	Perez-Lara et al. 2016
QTL1761	7A	4.4	3.7	7.3	Flowering (days)	37.4	30.3339	44.4661	Perez-Lara et al. 2016
QTL1762	5A	204.3	3.3	6.9	Flowering (days)	43.93	36.4543	51.4057	Perez-Lara et al. 2016
QTL1763	4A	41.5	3.7	6.3	Flowering (DD)	38.42	30.2323	46.6077	Perez-Lara et al. 2016
QTL1764	2A	171.4	10.36	15.87	Grain number per spike	49.8	47.754	51.846	Bhusal et al. 2017
QTL1765	2A	156	10.16	20.04	Grain number per spike	49.4	47.7797	51.0203	Bhusal et al. 2017
QTL1766	2A	171.4	12.17	19.86	Grain weight per spike	49.8	48.165	51.435	Bhusal et al. 2017
QTL1767	2A	156	4.45	7.56	Grain weight per spike	49.4	45.105	53.695	Bhusal et al. 2017
QTL1768	2A	171.4	7.31	12.15	Grain yield	49.8	47.1276	52.4724	Bhusal et al. 2017
QTL1769	2A	171.4	21.01	30.63	Thousand grain weight	49.8	48.7399	50.8601	Bhusal et al. 2017
QTL1770	2A	138.5	9.67	23.16	Grain number per spike	54.6	53.198	56.002	Bhusal et al. 2017
QTL1771	2A	156	7.72	17.02	Grain number per spike	49.4	47.4922	51.3078	Bhusal et al. 2017
QTL1772	2A	171.4	7.56	13.11	Grain weight per spike	49.8	47.3233	52.2767	Bhusal et al. 2017
QTL1773	2A	156	4.76	9.46	Grain yield	49.4	45.9676	52.8324	Bhusal et al. 2017
QTL1774	6D	21.6	3.03	11.22	Grain number per spike	64.7	61.806	67.594	Bhusal et al. 2017
QTL1775	2A	156	3.89	7.2	Grain number per spike	49.4	44.8903	53.9097	Bhusal et al. 2017
QTL1776	6D	21.6	3.24	8.92	Grain weight per spike	64.7	61.0599	68.3401	Bhusal et al. 2017
QTL1777	6D	0	3.27	13.24	Grain weight per spike	114.5	112.048	116.952	Bhusal et al. 2017
QTL1778	2A	38.6	4.73	28.85	Grain weight per spike	15.2	14.0745	16.3255	Bhusal et al. 2017
QTL1779	6D	21.6	3.64	16.26	Grain yield	64.7	62.7031	66.6969	Bhusal et al. 2017
QTL1780	2A	171.4	14.21	23.69	Thousand-kernel weight	49.8	48.4294	51.1706	Bhusal et al. 2017
QTL1781	2B	0	3.74	15.23	Grain filling duration	48.2	46.068	50.332	Bhusal et al. 2017
QTL1782	2B	30.4	3.12	5.67	Grain filling duration	71.3	65.5733	77.0267	Bhusal et al. 2017
QTL1783	2A	171.4	7.38	12.82	Grain filling rate	49.8	47.2672	52.3328	Bhusal et al. 2017
QTL1784	2A	156	4.4	8.74	Grain filling rate	49.4	45.6849	53.1151	Bhusal et al. 2017
QTL1785	6D	21.6	4.46	16.28	Grain filling rate	64.7	62.7055	66.6945	Bhusal et al. 2017
QTL1786	2A	107	3.71	6.74	Grain filling rate	29.8	24.9825	34.6175	Bhusal et al. 2017
QTL1787	2D	NA	7.8	11.3	Biomass	39.33	34.7361	43.9239	Mason et al. 2017
QTL1788	6B	NA	4.4	5.4	Biomass	52	42.3869	61.6131	Mason et al. 2017
QTL1789	1A	47.50-73.20	3.3	11.4	Harvest Index	37.95	30.2628	45.6372	Roncallo et al. 2017
QTL1790	1A	118.00-155.90	3.3	20.1	Grain number per ear	124.95	120.59	129.31	Roncallo et al. 2017
QTL1791	1A	39.1	3.1	14.1	Grain number per ear	37.2	30.9848	43.4152	Roncallo et al. 2017
QTL1792	1A	23.8	3.1	22	Grain weight per ear	31.8	27.8166	35.7834	Roncallo et al. 2017
QTL1793	1A	23.80-47.50	5.6	21.2	fertile spikelet number	35	30.8663	39.1337	Roncallo et al. 2017
QTL1794	1A	23.80-47.50	8.8	29.1	Spikelet number per ear	35	31.9885	38.0115	Roncallo et al. 2017
QTL1795	1B	60.5	4.3	15.6	Biomass yield per plant	42.5	36.8824	48.1176	Roncallo et al. 2017
QTL1796	1B	60.5	3.3	11.3	fertile spikelet number	42.5	34.7447	50.2553	Roncallo et al. 2017
QTL1797	1B	60.5	2.9	12.3	Grain number per plant	42.5	35.3753	49.6247	Roncallo et al. 2017
QTL1798	1B	60.5	4.2	15	Grain weight per plant	42.5	36.6577	48.3423	Roncallo et al. 2017
QTL1799	1B	60.5	4	12.5	Spikelet number per ear	42.5	35.4892	49.5108	Roncallo et al. 2017
QTL1800	1B	20.8	3.3	9.9	Grain yield	28.7	19.848	37.552	Roncallo et al. 2017
QTL1801	1B	98.6	3.1	10.9	Biomass yield per plant	47.7	39.6601	55.7399	Roncallo et al. 2017
QTL1802	1B	98.6	4.3	47.4	fertile spikelet number	47.7	45.8512	49.5488	Roncallo et al. 2017
QTL1803	1B	98.6	3.9	19.1	Thousand grain weight	47.7	43.1118	52.2882	Roncallo et al. 2017
QTL1804	1B	98.6	3.2	9.9	Grain yield	47.7	38.848	56.552	Roncallo et al. 2017
QTL1805	1B	15.4	3	10.7	Grain weight per ear	27.3	19.1099	35.4901	Roncallo et al. 2017
QTL1806	1B	35.10-40.20	3.8	12.9	Thousand grain weight	31.8	25.0066	38.5934	Roncallo et al. 2017
QTL1807	1B	40.2	4.7	18.2	Grain weight per ear	25	20.1849	29.8151	Roncallo et al. 2017
QTL1808	1B	40.2	3.1	13.8	Grain yield	25	18.6497	31.3503	Roncallo et al. 2017
QTL1809	2A	NA	3.6	13.1	Spike number per plant	50.8	44.1104	57.4896	Roncallo et al. 2017
QTL1810	2A	NA	3.2	13.7	Thousand grain weight	50.8	44.4033	57.1967	Roncallo et al. 2017
QTL1811	2A	NA	3	11.6	Biomass yield per plant	35.15	27.5953	42.7047	Roncallo et al. 2017
QTL1812	2A	NA	4.3	23.4	Harvest Index	35.15	31.4049	38.8951	Roncallo et al. 2017
QTL1813	2A	NA	3.7	10.6	Grain number per fertile spikelet	53.1	44.8326	61.3674	Roncallo et al. 2017
QTL1814	2A	NA	3.1	12	Spike number per plant	117.3	109.997	124.603	Roncallo et al. 2017
QTL1815	2A	NA	3.7	10.5	Grain number per total spikelets	57.1	48.7539	65.4461	Roncallo et al. 2017
QTL1816	2B	21.4	5.4	18.4	Harvest Index	57.1	52.3373	61.8627	Roncallo et al. 2017
QTL1817	2B	21.4	7.1	23	Grain yield	57.1	53.2898	60.9102	Roncallo et al. 2017
QTL1818	2B	0	3.6	14.9	Grain number per fertile spikelet	39.6	33.7185	45.4815	Roncallo et al. 2017
QTL1819	2B	0	4	17.9	Grain number per total spikelets	39.6	34.7042	44.4958	Roncallo et al. 2017
QTL1820	2B	0.00-21.40	8.4	32.1	Spikelet number per ear	48.35	45.62	51.08	Roncallo et al. 2017
QTL1821	2B	96.80-103.74	3	11.7	Grain number per plant	105.9	98.4099	113.39	Roncallo et al. 2017
QTL1822	2B	96.80-103.74	2.7	9	Grain weight per plant	105.9	96.1628	115.637	Roncallo et al. 2017
QTL1823	2B	96.80-103.74	3.3	12.6	Spike fertility	105.9	98.9449	112.855	Roncallo et al. 2017
QTL1824	2B	96.80-103.74	4.8	17.3	Thousand grain weight	105.9	100.834	110.966	Roncallo et al. 2017
QTL1825	3A	28.2	4.7	24.2	Biomass yield per plant	78.1	74.4787	81.7213	Roncallo et al. 2017
QTL1826	3A	28.2	4	15.7	Spike number per plant	78.1	72.5182	83.6818	Roncallo et al. 2017
QTL1827	3A	64.4	3.9	16.3	Grain number per ear	67.1	61.7237	72.4763	Roncallo et al. 2017
QTL1828	3A	64.4	3	9	Grain number per total spikelets	67.1	57.3628	76.8372	Roncallo et al. 2017
QTL1829	3A	64.4	6.5	29.8	Harvest Index	67.1	64.1592	70.0408	Roncallo et al. 2017
QTL1830	3A	64.4	3.9	12.6	Spike fertility	67.1	60.1449	74.0551	Roncallo et al. 2017
QTL1831	3A	29.50-40.60	3.3	11.3	Harvest Index	59.5	51.7447	67.2553	Roncallo et al. 2017
QTL1832	3A	29.50-40.60	4	17.3	Spikes per square meter	59.5	54.4344	64.5656	Roncallo et al. 2017
QTL1833	3A	0.00-8.80	3.2	14.2	Grain number per fertile spikelet	32.95	26.7786	39.1214	Roncallo et al. 2017
QTL1834	3B	7.30-22.00	6.6	20.8	Grain number per total spikelets	20.05	15.8368	24.2632	Roncallo et al. 2017
QTL1835	3B	7.30-13.00	6.8	21.1	Grain number per fertile spikelet	18.7	14.5467	22.8533	Roncallo et al. 2017
QTL1836	3B	7.30-13.00	5.7	15.3	Thousand grain weight	18.7	12.9723	24.4277	Roncallo et al. 2017
QTL1837	3B	136.90-180.00	3.5	28.3	Grain number per fertile spikelet	93.35	90.2534	96.4466	Roncallo et al. 2017
QTL1838	3B	22	4.9	23.9	Grain yield	23.9	20.2333	27.5667	Roncallo et al. 2017
QTL1839	3B	180.00-190.00	3.9	15.3	Spike fertility	113.45	107.722	119.178	Roncallo et al. 2017
QTL1840	3B	179.40-180.00	4.4	13.1	Grain number per total spikelets	121.5	114.81	128.19	Roncallo et al. 2017
QTL1841	3B	179.40-180.00	3.6	11.9	Thousand grain weight	121.5	114.136	128.864	Roncallo et al. 2017
QTL1842	3B	13.00-22.00	3.2	10	Biomass yield per plant	22.55	13.7866	31.3134	Roncallo et al. 2017
QTL1843	3B	13.00-22.00	6	20.3	Grain number per ear	22.55	18.233	26.867	Roncallo et al. 2017
QTL1844	3B	13.00-22.00	4.5	16.5	Grain number per plant	22.55	17.2388	27.8612	Roncallo et al. 2017
QTL1845	3B	13.00-22.00	4.4	18.7	Grain weight per ear	22.55	17.8637	27.2363	Roncallo et al. 2017
QTL1846	3B	13.00-22.00	3.5	12.5	Spike fertility	22.55	15.5392	29.5608	Roncallo et al. 2017
QTL1847	3B	13.00-22.00	10.7	38	Grain yield	22.55	20.2438	24.8562	Roncallo et al. 2017
QTL1848	3B	43.4	3.1	15.1	Grain number per plant	58.1	52.2964	63.9036	Roncallo et al. 2017
QTL1849	3B	43.4	3.6	14.3	Grain weight per plant	58.1	51.9717	64.2283	Roncallo et al. 2017
QTL1850	4A	NA	3.8	12.4	Grain number per fertile spikelet	46.1	39.0327	53.1673	Roncallo et al. 2017
QTL1851	4A	NA	4.5	16.6	Grain number per plant	46.1	40.8208	51.3792	Roncallo et al. 2017
QTL1852	4A	NA	3.7	11	Grain number per total spikelets	46.1	38.1332	54.0668	Roncallo et al. 2017
QTL1853	4A	NA	4	14.4	Harvest Index	46.1	40.0143	52.1857	Roncallo et al. 2017
QTL1854	4A	NA	3.7	13	Spike number per plant	46.1	39.3589	52.8411	Roncallo et al. 2017
QTL1855	4A	NA	4.9	14.3	Grain yield	46.1	39.9717	52.2283	Roncallo et al. 2017
QTL1856	4A	NA	3.7	17.4	Biomass yield per plant	68	62.9635	73.0365	Roncallo et al. 2017
QTL1857	4A	NA	3.5	14	Grain weight per plant	68	61.7404	74.2596	Roncallo et al. 2017
QTL1858	4A	NA	4	11.2	Grain yield	68	60.1755	75.8245	Roncallo et al. 2017
QTL1859	4A	NA	4.2	14.6	fertile spikelet number	58.4	52.3976	64.4024	Roncallo et al. 2017
QTL1860	4A	NA	3.3	12.2	Grain number per ear	58.4	51.2169	65.5831	Roncallo et al. 2017
QTL1861	4A	NA	3.9	12.9	Biomass yield per plant	60.8	54.0066	67.5934	Roncallo et al. 2017
QTL1862	4A	NA	4.4	14.8	Grain weight per ear	60.8	54.8788	66.7212	Roncallo et al. 2017
QTL1863	4A	NA	3.9	14	Grain weight per plant	60.8	54.5404	67.0596	Roncallo et al. 2017
QTL1864	4A	NA	3.5	13.8	Spike fertility	28.2	21.8497	34.5503	Roncallo et al. 2017
QTL1865	4A	NA	2.7	6.3	Grain yield	28.2	14.2898	42.1102	Roncallo et al. 2017
QTL1866	4B	NA	3.8	17.6	Grain yield	45.25	40.2708	50.2292	Roncallo et al. 2017
QTL1867	4B	NA	2.8	12.4	fertile spikelet number	27.1	20.0327	34.1673	Roncallo et al. 2017
QTL1868	4B	NA	4.9	19.8	Grain number per ear	27.1	22.674	31.526	Roncallo et al. 2017
QTL1869	4B	NA	2.8	10.6	Grain weight per ear	27.1	18.8326	35.3674	Roncallo et al. 2017
QTL1870	4B	NA	2.9	9.8	Harvest Index	27.1	18.1577	36.0423	Roncallo et al. 2017
QTL1871	4B	NA	3.4	14.7	Grain number per plant	26.8	20.8385	32.7615	Roncallo et al. 2017
QTL1872	4B	NA	3.8	16.2	Grain number per total spikelets	26.8	21.3905	32.2095	Roncallo et al. 2017
QTL1873	4B	NA	5	19	Spikes per square meter	26.8	22.1877	31.4123	Roncallo et al. 2017
QTL1874	5A	NA	3.5	22.9	Grain number per total spikelets	52.1	48.2732	55.9268	Roncallo et al. 2017
QTL1875	5A	NA	3.8	22.4	Grain weight per ear	52.1	48.1877	56.0123	Roncallo et al. 2017
QTL1876	5A	NA	4.2	15.2	Thousand grain weight	52.1	46.3346	57.8654	Roncallo et al. 2017
QTL1877	5A	NA	2.95	32.5	Spikelet number per ear	52.1	49.4036	54.7964	Roncallo et al. 2017
QTL1878	5A	NA	2.8	14.2	Grain weight per ear	108.5	102.329	114.671	Roncallo et al. 2017
QTL1879	5B	NA	3.6	8.5	Grain yield	39.3	28.9901	49.6099	Roncallo et al. 2017
QTL1880	5B	NA	2.9	14.8	Thousand grain weight	112.4	106.479	118.321	Roncallo et al. 2017
QTL1881	6A	NA	5.1	15.1	Grain number per fertile spikelet	97.8	91.9964	103.604	Roncallo et al. 2017
QTL1882	6A	NA	3.9	14.3	Spikes per square meter	97.8	91.6717	103.928	Roncallo et al. 2017
QTL1883	6A	NA	3.2	12.8	Grain weight per plant	63.6	56.7536	70.4464	Roncallo et al. 2017
QTL1884	6A	NA	2.6	6.3	Grain yield	63.6	49.6898	77.5102	Roncallo et al. 2017
QTL1885	6A	NA	4.9	19	Spikelet number per ear	69.2	64.5877	73.8123	Roncallo et al. 2017
QTL1886	6B	NA	4.2	15.9	Thousand grain weight	53.35	47.8384	58.8616	Roncallo et al. 2017
QTL1887	6B	NA	3	9.4	Grain number per total spikelets	53.65	44.3272	62.9728	Roncallo et al. 2017
QTL1888	6B	NA	2.8	9.9	Grain number per ear	57.65	48.798	66.502	Roncallo et al. 2017
QTL1889	6B	NA	3.1	11.7	Thousand grain weight	70.2	62.7099	77.6901	Roncallo et al. 2017
QTL1890	7A	NA	3	9.8	Grain number per ear	65.1	56.1577	74.0423	Roncallo et al. 2017
QTL1891	7A	NA	2.8	13.7	Harvest Index	65.1	58.7033	71.4967	Roncallo et al. 2017
QTL1892	7A	NA	6.1	24.4	Spikes per square meter	65.1	61.5084	68.6916	Roncallo et al. 2017
QTL1893	7A	NA	4.1	16.1	Harvest Index	4	-1.44313	9.44313	Roncallo et al. 2017
QTL1894	7A	NA	2.8	12.9	Spike fertility	4	-2.79337	10.7934	Roncallo et al. 2017
QTL1895	7A	NA	3.1	10.8	Grain number per fertile spikelet	73.2	65.0857	81.3143	Roncallo et al. 2017
QTL1896	7B	NA	3.5	13.3	Grain number per fertile spikelet	75.9	69.3109	82.4891	Roncallo et al. 2017
QTL1897	7B	NA	3.3	11.5	Grain number per total spikelets	75.9	68.2796	83.5204	Roncallo et al. 2017
QTL1898	7B	NA	4.4	12.7	Grain number per fertile spikelet	142.2	135.3	149.1	Roncallo et al. 2017
QTL1899	7B	NA	4.3	14.3	Spikelet number per ear	142.2	136.072	148.328	Roncallo et al. 2017
QTL1900	7B	NA	3	12	Thousand grain weight	63.7	56.3971	71.0029	Roncallo et al. 2017
QTL1901	7B	NA	3	11.6	Thousand grain weight	28.6	21.0453	36.1547	Roncallo et al. 2017
QTL1902	7B	NA	4.1	39.7	Thousand grain weight	132	129.793	134.207	Roncallo et al. 2017
QTL1903	7B	NA	3.9	12.2	Grain yield	0	-7.18315	7.18315	Roncallo et al. 2017
QTL1904	7A	69.39	18.61	17.84	Spikelet number per spike(SPN)	42.8	38.6088	46.9912	Yu et al. 2017
QTL1905	1A	98.19	3	8.48	Thousand grain weight	36.4	25.3184	47.4816	Chen et al. 2017
QTL1906	3B	12.1	3	4.13	Thousand grain weight	22.255	-0.498422	45.0084	Chen et al. 2017
QTL1907	4A	76	3	6.96	Thousand grain weight	64.4	50.8983	77.9017	Chen et al. 2017
QTL1908	4B	55.4	3	16.21	Thousand grain weight	32.67	26.8729	38.4671	Chen et al. 2017
QTL1909	4D	10	3	16.35	Thousand grain weight	59.52	53.7725	65.2675	Chen et al. 2017
QTL1910	5A	24	3	8.16	Thousand grain weight	125.15	113.634	136.666	Chen et al. 2017
QTL1911	7B	49.1	3	3.72	Thousand grain weight	63.15	37.8888	88.4112	Chen et al. 2017
QTL1912	7B	37.5	3	4.85	Thousand grain weight	59.6	40.2244	78.9756	Chen et al. 2017
QTL1913	1A	101.19	3	19.87	Grain number per spike	36.4	31.6707	41.1293	Chen et al. 2017
QTL1914	1A	90.19	3	64.47	Grain number per spike	38	36.5424	39.4576	Chen et al. 2017
QTL1915	3D	100.85	3	3.04	Grain number per spike	41.3	10.3883	72.2117	Chen et al. 2017
QTL1916	4A	74	3	7.39	Grain number per spike	64.4	51.6839	77.1161	Chen et al. 2017
QTL1917	4A	111.2	3	6.42	Grain number per spike	69.4	54.7627	84.0373	Chen et al. 2017
QTL1918	4B	60.4	3	1.92	Grain number per spike	32.67	-16.2736	81.6136	Chen et al. 2017
QTL1919	4B	42.7	3	3.63	Grain number per spike	28.45	2.5625	54.3375	Chen et al. 2017
QTL1920	7D	257.94	3	4.82	Grain number per spike	143.1	123.604	162.596	Chen et al. 2017
QTL1921	1A	101.19	3	25.44	kernel per spike	36.4	32.7061	40.0939	Chen et al. 2017
QTL1922	1A	1.8	3	28.56	kernel per spike	15	11.7097	18.2903	Chen et al. 2017
QTL1923	1A	92.19	3	21.75	kernel per spike	38	33.6795	42.3205	Chen et al. 2017
QTL1924	4A	77	3	4.1	kernel per spike	64.4	41.4801	87.3199	Chen et al. 2017
QTL1925	6D	114.13	3	9.3	kernel per spike	72	61.8955	82.1045	Chen et al. 2017
QTL1926	7A	53.5	3	3.78	kernel per spike	84.73	59.8698	109.59	Chen et al. 2017
QTL1927	2D	4.5	3	25.53	Spike length	10.225	6.54417	13.9058	Chen et al. 2017
QTL1928	2D	5.5	3	16.48	Spike length	2.55	-3.15216	8.25216	Chen et al. 2017
QTL1929	4A	66	3	21.28	Spike length	37.9	33.484	42.316	Chen et al. 2017
QTL1930	4A	85	3	9.54	Spike length	64.4	54.5497	74.2503	Chen et al. 2017
QTL1931	5D	84.67	3	7.26	Spike length	44.8	31.8562	57.7438	Chen et al. 2017
QTL1932	7B	29.7	3	6.08	Spike length	44.55	29.0941	60.0059	Chen et al. 2017
QTL1933	1A	87.19	3	19.61	Spikelet number per ear	38	33.208	42.792	Chen et al. 2017
QTL1934	1D	2	3	6.26	Spikelet number per ear	109.665	94.6536	124.676	Chen et al. 2017
QTL1935	3D	86.35	3	6.84	Spikelet number per ear	41.4	27.6615	55.1385	Chen et al. 2017
QTL1936	4A	74	3	9.96	Spikelet number per ear	64.4	54.9651	73.8349	Chen et al. 2017
QTL1937	7B	90.19	3	5.13	Spikelet number per ear	28.6	10.2819	46.9181	Chen et al. 2017
QTL1938	5B	#REF!	5.47	7.8	Thousand kernel weight	126.5	115.549	137.451	Deng et al. 2017
QTL1939	3D	#N/A	3.22	7.53	Grain number per spike	75.5	64.1565	86.8435	Deng et al. 2017
QTL1940	6D	56	4.85	10.18	Thousand kernel weight	46.1	37.7094	54.4906	Deng et al. 2017
QTL1941	3A	#N/A	3.87	10.57	Thousand kernel weight	71.8	63.719	79.881	Deng et al. 2017
QTL1942	7B	12	5.35	9.34	Spike length	115.7	106.555	124.845	Deng et al. 2017
QTL1943	4B	8	9.93	19.18	Thousand kernel weight	43.15	38.6966	47.6034	Deng et al. 2017
QTL1944	2D	#N/A	11.79	22.89	Spike length	1.05	-2.68161	4.78161	Deng et al. 2017
QTL1945	2D	#N/A	5.72	12.59	sterile spikelet number	1.05	-5.73449	7.83449	Deng et al. 2017
QTL1946	2D	#N/A	4.48	9.85	fertile spikelet number	1.05	-7.62174	9.72174	Deng et al. 2017
QTL1947	7D	130	3.32	8.49	sterile spikelet number	103.7	93.6391	113.761	Deng et al. 2017
QTL1948	3B	#N/A	3.26	5.68	fertile spikelet number	81.15	66.1119	96.1881	Deng et al. 2017
QTL1949	7D	115	4.36	7.66	fertile spikelet number	92.4	81.249	103.551	Deng et al. 2017
QTL1950	7D	115	4.1	7	Thousand kernel weight	92.4	80.1976	104.602	Deng et al. 2017
QTL1951	2D	#N/A	8.45	24.2	Spike length	4.95	1.42039	8.47961	Deng et al. 2017
QTL1952	2D	#N/A	5.55	20.3	sterile spikelet number	4.95	0.742282	9.15772	Deng et al. 2017
QTL1953	2D	#N/A	5.72	10.15	fertile spikelet number	4.95	-3.46544	13.3654	Deng et al. 2017
QTL1954	5D	#N/A	10.09	17.65	sterile spikelet number	63.25	58.4105	68.0895	Deng et al. 2017
QTL1955	5D	#N/A	7.13	16.8	fertile spikelet number	63.25	58.1657	68.3343	Deng et al. 2017
QTL1956	5D	#N/A	3.63	8.55	fertile spikelet number	63.25	53.2597	73.2403	Deng et al. 2017
QTL1957	4A	#N/A	3.29	6.77	Grain number per spike	88.65	76.0331	101.267	Deng et al. 2017
QTL1958	5B	#N/A	4.09	6.76	sterile spikelet number	129.7	117.064	142.336	Deng et al. 2017
QTL1959	4A	#N/A	4.75	11.24	Grain number per spike	65.2	57.6007	72.7993	Deng et al. 2017
QTL1960	3A	#N/A	3.4	6.92	Spike length	66.3	53.9566	78.6434	Deng et al. 2017
QTL1961	7D	163	4	7.12	fertile spikelet number	158.35	146.353	170.347	Deng et al. 2017
QTL1962	4D	#N/A	3.77	5.27	Thousand kernel weight	33.1	16.8919	49.3081	Deng et al. 2017
QTL1963	4B	#N/A	4.44	6.52	fertile spikelet number	53.05	39.9493	66.1507	Deng et al. 2017
QTL1964	4B	#N/A	3.37	6.87	Spike length	27.5	15.0667	39.9333	Deng et al. 2017
QTL1965	7D	#N/A	5.87	9.18	Thousand kernel weight	134.45	125.145	143.755	Deng et al. 2017
QTL1966	4A	44	3.24	5.57	sterile spikelet number	84.7	69.3649	100.035	Deng et al. 2017
QTL1967	3D	NA	5.86	10.91	fertile spikelet number	63.5	55.6708	71.3292	Deng et al. 2017
QTL1968	6A	NA	3.57	11.47	fertile spikelet number	39.9	32.453	47.347	Deng et al. 2017
QTL1969	2B	75	3.18	6.31	sterile spikelet number	74.2	60.6633	87.7367	Deng et al. 2017
QTL1970	2B	75	8.39	15.57	fertile spikelet number	74.2	68.714	79.686	Deng et al. 2017
QTL1971	2B	75	3.25	5.66	Thousand kernel weight	74.2	59.1087	89.2913	Deng et al. 2017
QTL1972	6A	54	9.35	15.18	Thousand kernel weight	69.2	63.5731	74.8269	Deng et al. 2017
QTL1973	5D	36	3.32	6.32	Spike length	40	26.4847	53.5153	Deng et al. 2017
QTL1974	4D	NA	4.07	9.39	sterile spikelet number	30.2	21.1034	39.2966	Deng et al. 2017
QTL1975	4D	NA	3.02	5.1	fertile spikelet number	30.2	13.4516	46.9484	Deng et al. 2017
QTL1976	1B	35	4.62	8.65	sterile spikelet number	38.4	28.5252	48.2748	Deng et al. 2017
QTL1977	1B	35	13.12	34.74	fertile spikelet number	38.4	35.9413	40.8587	Deng et al. 2017
QTL1978	1A	NA	5.14	9.83	Grain number per spike	38.4	29.7106	47.0894	Deng et al. 2017
QTL1979	1A	NA	3.16	4.44	Thousand kernel weight	38.4	19.162	57.638	Deng et al. 2017
QTL1980	1B	25	9.91	18.55	sterile spikelet number	27.3	22.6953	31.9047	Deng et al. 2017
QTL1981	1A	NA	3.41	5.84	fertile spikelet number	115.5	100.874	130.126	Deng et al. 2017
QTL1982	4D	NA	3.3	6.43	Thousand kernel weight	30.2	16.9159	43.4841	Deng et al. 2017
QTL1983	2A	NA	3.15	6.91	Spike length	51	38.6387	63.3613	Deng et al. 2017
QTL1984	3B	NA	3.49	6.75	Grain number per spike	60.1	47.4457	72.7543	Deng et al. 2017
QTL1985	2D	NA	4.92	8.61	Thousand kernel weight	19.7	9.77937	29.6206	Deng et al. 2017
QTL1986	2B	65	6.53	11.45	sterile spikelet number	71.3	63.84	78.76	Deng et al. 2017
QTL1987	2B	65	13.9	28.43	fertile spikelet number	71.3	68.2955	74.3045	Deng et al. 2017
QTL1988	2B	65	7.24	17.24	Grain number per spike	71.3	66.3454	76.2546	Deng et al. 2017
QTL1989	2B	65	8.77	15.93	Thousand kernel weight	71.3	65.938	76.662	Deng et al. 2017
QTL1990	1B	25	3.72	6.57	sterile spikelet number	27.3	14.299	40.301	Deng et al. 2017
QTL1991	7A	NA	3.17	4.66	fertile spikelet number	35.8	17.4702	54.1298	Deng et al. 2017
QTL1992	1B	82	7.09	21.03	Thousand kernel weight	54.8	50.7383	58.8617	Deng et al. 2017
QTL1993	5A	NA	5.2	19.2	Kernel weight	43.9	40.7322	47.0678	Cheng et al. 2017
QTL1994	1B	111.4	10.9	8	BW, GY, KPS, MSHW, TS, TW	38.81	34.1153	43.5047	Assanga et al. 2017
QTL1995	2B	165.5	17.3	57.7	DTH, GFL, GLA, HI, Thousand kernel weight, TW	95.26	94.6091	95.9109	Assanga et al. 2017
QTL1996	2D	1.2	9.9	17.7	DTH, GFL, GLA, TW	50.17	48.0481	52.2919	Assanga et al. 2017
QTL1997	5A	100.4	5.1	9	KPM, GY, MSHW, PH, SPM, Thousand kernel weight, TS	53.94	49.7669	58.1131	Assanga et al. 2017
QTL1998	5A	17.7	4.9	3.9	GFL, KPM, Thousand kernel weight, TW	39.22	29.5898	48.8502	Assanga et al. 2017
[truncated: 283 more rows]

## Sheet: Table S3
Table S2. Some representative independent genetic maps used to construct consensus maps and QTL projection
Map name	Chromosome	marker	Position (cM)	Map name	Chromosome	marker	Position (cM)	Map name	Chromosome	marker	Position (cM)	Map name	Chromosome	marker	Position (cM)	Map name	Chromosome	marker	Position (cM)	Map name	Chromosome	marker	Position (cM)	Map name	Chromosome	marker	Position (cM)	Map name	Chromosome	marker	Position (cM)	Map name	Chromosome	marker	Position (cM)	Map name	Chromosome	marker	Position (cM)	Map name	Chromosome	marker	Position (cM)	Map name	Chromosome	marker	Position (cM)	Map name	Chromosome
Araki et al. 1999	4A	Xpsr160	0	Shah et al. 1999	3A	Eps	0	Yang et al. 2019	1A	Kasp_ 1A10	0	Hu et al. 2019	1A	BobWhite_c46501_92	0	Liu et al. 2019	2A	Excalibur_ C47973_ 67	0	Goel et al. 2019	1A	wmc4691	0	Tura et al. 2019	1B	ksm0117b	0	Cabral et al. 2018	gpw7078	1A	0	Li et al. 2018	1A	IWB74219	0	Su et al. 2018	1A	Ex_c34070_464	0	Assanga et al. 2017	1A	Xcfd25	0	Deng et al. 2017	1B	Xcfel56	0	Yu et al. 2016	1A
Araki et al. 1999	4A	Xpsr119	1	Shah et al. 1999	3A	Xcdo549	30.6	Yang et al. 2019	1A	Kasp_ 1A90	0.7	Hu et al. 2019	1A	BS00084022_51	8.55	Liu et al. 2019	2A	Ku_ c8929_ 274	11.7	Goel et al. 2019	1A	gwm357	8.4	Tura et al. 2019	1B	psp3000	0	Cabral et al. 2018	Glu-A3	1A	0	Li et al. 2018	1A	IWB525	4.3	Su et al. 2018	1A	BS00023102_51	0	Assanga et al. 2017	1A	Xgwm33	9.7	Deng et al. 2017	1B	Xwmc406	25	Yu et al. 2016	1A
Araki et al. 1999	4A	Wx-B1	22.7	Shah et al. 1999	3A	Xbcd907	30.6	Yang et al. 2019	1A	Kasp_ 1A58	1.9	Hu et al. 2019	1A	Kukri_c22508_119	8.91	Liu et al. 2019	2A	BS00111069_ _51	16	Goel et al. 2019	1A	barc28	11.3	Tura et al. 2019	1B	X1128786	0	Cabral et al. 2018	RFL_Contig854_2201	1A	0	Li et al. 2018	1A	IWB31385	8.7	Su et al. 2018	1A	BS00062942_51	0	Assanga et al. 2017	1A	Xmag1884	21.2	Deng et al. 2017	1B	Xbarcl56	33	Yu et al. 2016	1A
Araki et al. 1999	4A	Xpsr115	25.8	Shah et al. 1999	3A	Xtam61	35	Yang et al. 2019	1A	Kasp_ 1A64	2.2	Hu et al. 2019	1A	Tdurum_contig13946_241	14.063	Liu et al. 2019	2A	2264948|F10-9:T>A-9:T>A	20.5	Goel et al. 2019	1A	cfa129	31.8	Tura et al. 2019	1B	wPt-2052	3.6	Cabral et al. 2018	Excalibur_c2868_451	1A	0	Li et al. 2018	1A	IWB48350	11.3	Su et al. 2018	1A	Excalibur_c64533_980	0	Assanga et al. 2017	1A	Xbarc197.1	25.8	Deng et al. 2017	1B	Xwmc31	33	Yu et al. 2016	1A
Araki et al. 1999	4A	Xbcd1316	42.6	Shah et al. 1999	3A	Xtam055	35	Yang et al. 2019	2B	Kasp_ 2B72	0	Hu et al. 2019	1A	IACX1465	14.58	Liu et al. 2019	2A	BS00089497_ _51	22.2	Goel et al. 2019	1A	wmc93	55.3	Tura et al. 2019	1B	X1011232	10.4	Cabral et al. 2018	GENE-1118_58	1A	0	Li et al. 2018	1A	IWB46752	15	Su et al. 2018	1A	Excalibur_rep_c66306_499	0	Assanga et al. 2017	1A	Xwmc329.1	33.1	Deng et al. 2017	1B	Xwmc626	33	Yu et al. 2016	1A
Araki et al. 1999	4A	Xbcd265	70.8	Shah et al. 1999	3A	Xcdo395	58.4	Yang et al. 2019	2B	Kasp_ 2B51	2.5	Hu et al. 2019	1A	BS00078982_51	20.775	Liu et al. 2019	2A	Kukri_ C22235_ 1547	38.3	Goel et al. 2019	1A	cfa2056	66.2	Tura et al. 2019	1B	x1034851	15	Cabral et al. 2018	Kukri_c22349_754	1A	0	Li et al. 2018	1A	IWB22004	19	Su et al. 2018	1A	Kukri_c11580_339	0	Assanga et al. 2017	1A	Xwmc24	42.9	Deng et al. 2017	1B	Xbarc119	34	Yu et al. 2016	1A
Araki et al. 1999	4A	Xbcd1738	85.6	Shah et al. 1999	3A	Xbcd1380	66.1	Yang et al. 2019	2B	Kasp_ 2B55	2.8	Hu et al. 2019	1A	RAC875_c5544_4156	22.206	Liu et al. 2019	2A	GENE-0644 _370	58.4	Goel et al. 2019	1A	gwm135	88.4	Tura et al. 2019	1B	X1091033	15	Cabral et al. 2018	Kukri_rep_c102231_265	1A	0	Li et al. 2018	1A	IWB51485	23	Su et al. 2018	1A	Kukri_c11580_451	0	Assanga et al. 2017	1A	Xmag1022.2	48.2	Deng et al. 2017	1B	Xgwm18	35	Yu et al. 2016	1A
Araki et al. 1999	4A	Xcdo1387	91.8	Shah et al. 1999	3A	Xksua6	74.7	Yang et al. 2019	2B	Kasp_ 2B16	3.3	Hu et al. 2019	1A	BS00065005_51	22.743	Liu et al. 2019	2A	IAAV539	59.5	Goel et al. 2019	1A	wmc716	100.3	Tura et al. 2019	1B	wPt-1139	16.3	Cabral et al. 2018	gwm136	1A	0	Li et al. 2018	1A	IWB31356	25	Su et al. 2018	1A	Kukri_c11580_818	0	Assanga et al. 2017	1A	Xwmc333	51.1	Deng et al. 2017	1B	Xwmc57	35	Yu et al. 2016	1A
Araki et al. 1999	4A	Hd	100	Shah et al. 1999	3A	Xcdo638	76.9	Yang et al. 2019	2B	Kasp_ 2B13	3.5	Hu et al. 2019	1A	BobWhite_c48591_394	23.675	Liu et al. 2019	2A	Kukn'_ c36783_ _91	60.6	Goel et al. 2019	1A	wmc254	112.7	Tura et al. 2019	1B	wPt-5801	16.3	Cabral et al. 2018	CAP12_c3074_192	1A	0	Li et al. 2018	1A	IWB35770	27.1	Su et al. 2018	1A	Ra_c3837_797	0	Assanga et al. 2017	1A	Xwmc183	53.9	Deng et al. 2017	1B	Xcwem6.1	35	Yu et al. 2016	1A
Araki et al. 1999	4A	Xpsr163	107.2	Shah et al. 1999	3A	Xmwg680	82.7	Yang et al. 2019	2B	Kasp_ 2B58	6.5	Hu et al. 2019	1A	RAC875_c826_2186	24.534	Liu et al. 2019	2A	tplb0024p13_ 611	63.3	Goel et al. 2019	1A	barc17	124.1	Tura et al. 2019	1B	wPt-2762	16.3	Cabral et al. 2018	BS00082567_51	1A	0	Li et al. 2018	1A	IWB57837	29.1	Su et al. 2018	1A	RAC875_c16677_56	0	Assanga et al. 2017	1A	Xgwm357	58.7	Deng et al. 2017	1B	Xwmc128	35	Yu et al. 2016	1A
				Shah et al. 1999	3A	Xbcd1555	87.1	Yang et al. 2019	3A	Kasp_ 3A14	0	Hu et al. 2019	1A	wsnp_BE490041A_Ta_2_1	24.818	Liu et al. 2019	2A	IAAV5331	63.9	Goel et al. 2019	1A	cfa2219	130.4	Tura et al. 2019	1B	X986079	16.3	Cabral et al. 2018	Tdurum_contig42405_197	1A	0	Li et al. 2018	1A	IWB10747	31.5	Su et al. 2018	1A	RAC875_c25708_503	0	Assanga et al. 2017	1A	Xmag3489	61.9	Deng et al. 2017	1B	Xbarc312	36	Yu et al. 2016	1A
				Shah et al. 1999	3A	Xbcd141	88.1	Yang et al. 2019	3A	Kasp_ 3A11	2.6	Hu et al. 2019	1A	Tdurum_contig9199_714	25.755	Liu et al. 2019	2A	Excalibur_ c41397_ _439	64.1	Goel et al. 2019	1A	gwm99	146.3	Tura et al. 2019	1B	wPt-3753	16.9	Cabral et al. 2018	BS00019251	1A	0	Li et al. 2018	1A	IWB75207	31.7	Su et al. 2018	1A	RAC875_c79971_61	0	Assanga et al. 2017	2A	Xwmc390.2	0	Deng et al. 2017	1B	Xcfe023. 1	36	Yu et al. 2016	1A
				Shah et al. 1999	3A	Xbcd372	88.1	Yang et al. 2019	3A	Kasp_ 3A10	5.1	Hu et al. 2019	1A	Ra_c27593_460	25.876	Liu et al. 2019	2A	Ex_ c10478_ 746	64.5	Goel et al. 2019	1A	gpw8036	168.8	Tura et al. 2019	1B	wPt-7833	19.5	Cabral et al. 2018	BS00026456_51	1A	0	Li et al. 2018	1A	IWA3398	31.9	Su et al. 2018	1A	RAC875_rep_c101933_656	0	Assanga et al. 2017	2A	Xmag3197	6.4	Deng et al. 2017	1B	Xbarc372	36	Yu et al. 2016	1A
				Shah et al. 1999	3A	Xbcd361	96.7	Yang et al. 2019	3A	Kasp_ 3A7	5.6	Hu et al. 2019	1A	Tdurum_contig5008_556	26.032	Liu et al. 2019	2A	Jagger_C3435_ 145	64.8	Goel et al. 2019	1A	cnl137	189.9	Tura et al. 2019	1B	X1115814	19.5	Cabral et al. 2018	BS00100774_51	1A	0	Li et al. 2018	1A	IWB40317	32.1	Su et al. 2018	1A	TA005766-0499	0	Assanga et al. 2017	2A	Xmwc455	11.2	Deng et al. 2017	1B	Xwmc412.2	36	Yu et al. 2016	1A
								Yang et al. 2019	3A	Kasp_ 3A9	6.7	Hu et al. 2019	1A	Excalibur_c12215_352	26.066	Liu et al. 2019	2A	Kukni_ c8595_ 953	65.6	Goel et al. 2019	1A	gpw2046	202.3	Tura et al. 2019	1B	X1164559	20.1	Cabral et al. 2018	Excalibur_c11258_1700	1A	0	Li et al. 2018	1A	IWB64862	34.3	Su et al. 2018	1A	Tdurum_contig19102_84	0	Assanga et al. 2017	2A	Xmag1730	16.5	Deng et al. 2017	1B	Xcfe023.2	37	Yu et al. 2016	1A
								Yang et al. 2019	3A	Kasp_ 3A8	6.8	Hu et al. 2019	1A	Kukri_c49776_192	26.766	Liu et al. 2019	2A	Jagger_ _c7212_ _85	66	Goel et al. 2019	1A	gpw2066	218.9	Tura et al. 2019	1B	BARCO0O8	31.3	Cabral et al. 2018	Excalibur_c35316_154	1A	0	Li et al. 2018	1A	IWA5310	36	Su et al. 2018	1A	wsnp_RFL_Contig2794_2564017	0	Assanga et al. 2017	2A	Xbarc5.2	26.5	Deng et al. 2017	1B	Xcfd21	37	Yu et al. 2016	1A
								Yang et al. 2019	3A	Kasp_ 3A5	8.2	Hu et al. 2019	1A	Tdurum_contig5008_635	26.822	Liu et al. 2019	2A	Tdurum_ contig11768_ 450	66.7	Goel et al. 2019	1A	gpw2142	238.3	Tura et al. 2019	1B	WPT-1684	31.3	Cabral et al. 2018	Excalibur_c58555_110	1A	0	Li et al. 2018	1A	IWB11190	38.7	Su et al. 2018	1A	wsnp_RFL_Contig373_3974834	0	Assanga et al. 2017	2A	Xgwm47.3	44.4	Deng et al. 2017	1B	Xcwem9	38	Yu et al. 2016	1A
								Yang et al. 2019	5B	Kasp_ 5B2	0	Hu et al. 2019	1A	RFL_Contig3232_1224	26.864	Liu et al. 2019	2A	GENE-1084_ _354	67.3	Goel et al. 2019	1B	wmc818	0	Tura et al. 2019	1B	X1121017	33.3	Cabral et al. 2018	RFL_Contig3481_1669	1A	0	Li et al. 2018	1A	IWB19762	40	Su et al. 2018	1A	RAC875_c2972_225	0.283	Assanga et al. 2017	2A	Xwmc181.2	61.5	Deng et al. 2017	1B	Xbarc120	38	Yu et al. 2016	1A
								Yang et al. 2019	5B	Kasp_ 5B3	1.9	Hu et al. 2019	1A	BobWhite_c7352_218	27.046	Liu et al. 2019	2A	Tdurum_ contig2945_ ,155	68.3	Goel et al. 2019	1B	gwm550	14.4	Tura et al. 2019	1B	x1202359	35.9	Cabral et al. 2018	TA001286-0611-w	1A	0	Li et al. 2018	1A	IWB14798	42.2	Su et al. 2018	1A	Excalibur_c5052_151	0.283	Assanga et al. 2017	2A	Xmag3579	66.8	Deng et al. 2017	1B	Xbarc008	38	Yu et al. 2016	1A
								Yang et al. 2019	5B	Kasp_ 5B4	4.7	Hu et al. 2019	1A	Kukri_c23985_229	27.531	Liu et al. 2019	2A	Tdurum_ contig25629_ 415	72.1	Goel et al. 2019	1B	barc194	23.2	Tura et al. 2019	1B	hbe0384	36.5	Cabral et al. 2018	tplb0025b13_2054	1A	0	Li et al. 2018	1A	IWB22767	44.4	Su et al. 2018	1A	RAC875_c11749_97	0.283	Assanga et al. 2017	2D	Xwmc181.1	0	Deng et al. 2017	1B	Xgwm218	40	Yu et al. 2016	1A
								Yang et al. 2019	5B	Kasp_ 5B5	7.7	Hu et al. 2019	1A	Kukri_c23985_166	27.765	Liu et al. 2019	2A	RAC875_ C59545_ 122-	72.7	Goel et al. 2019	1B	gwm413	46	Tura et al. 2019	1B	X3024078	36.5	Cabral et al. 2018	gdm33a	1A	0	Li et al. 2018	1A	IWB2328	45.9	Su et al. 2018	1A	RAC875_c16352_326	0.283	Assanga et al. 2017	2D	Xaf12	5.7	Deng et al. 2017	1B	Xgwm582	44	Yu et al. 2016	1A
								Yang et al. 2019	5B	Kasp_ 5B6	11.4	Hu et al. 2019	1A	CAP7_c2317_217	27.985	Liu et al. 2019	2A	RAC875_ C12803_ 916	74.2	Goel et al. 2019	1B	cfd65	65.9	Tura et al. 2019	1B	X1091354	37.2	Cabral et al. 2018	wPt-2527	1A	0	Li et al. 2018	1A	IWB36443	47.6	Su et al. 2018	1A	RAC875_c18282_1390	0.283	Assanga et al. 2017	2D	Xmag4089	7.9	Deng et al. 2017	1B	Xcfe026.2	57	Yu et al. 2016	1A
								Yang et al. 2019	5B	Kasp_ 5B8	11.6	Hu et al. 2019	1A	CAP7_c4833_141	29.516	Liu et al. 2019	2A	GENE-1125 _32	74.4	Goel et al. 2019	1B	barc137	69.8	Tura et al. 2019	1B	X1110537	37.8	Cabral et al. 2018	Tdurum_contig46413_779	1A	10.4434	Li et al. 2018	1A	IWB74701	48.1	Su et al. 2018	1A	RAC875_c63421_83	0.283	Assanga et al. 2017	2D	Xcfd239	25.8	Deng et al. 2017	1B	Xbarc061	70	Yu et al. 2016	1A
								Yang et al. 2019	5B	Kasp_ 5B9	15	Hu et al. 2019	1A	BS00076538_51	33.774	Liu et al. 2019	2A	Tdurum_ contig28795_ 381	79.8	Goel et al. 2019	1B	gwm268	90.3	Tura et al. 2019	1B	barc0137	40.4	Cabral et al. 2018	CAP11_c2581_302	1A	10.4434	Li et al. 2018	1A	IWB38496	48.7	Su et al. 2018	1A	Tdurum_contig14650_689	0.283	Assanga et al. 2017	2D	Xbarc159.3	27.8	Deng et al. 2017	1B	Xwmc766	82	Yu et al. 2016	1A
								Yang et al. 2019	5B	Kasp_ 5B11	16.8	Hu et al. 2019	1A	IACX7695	34.211	Liu et al. 2019	2A	10908791F0-26:G>A-26:G>A	94.9	Goel et al. 2019	1B	gwm131	106.4	Tura et al. 2019	1B	x1130877	40.4	Cabral et al. 2018	Kukri_c1977_1940	1A	10.4434	Li et al. 2018	1A	IWB31675	48.9	Su et al. 2018	1A	Kukri_c13156_129	3.316	Assanga et al. 2017	2D	Xmag2721	31.6	Deng et al. 2017	1B	Xswes 158	121	Yu et al. 2016	1A
								Yang et al. 2019	5B	Kasp_ 5B12	19.3	Hu et al. 2019	1A	Kukri_rep_c103147_745	34.268	Liu et al. 2019	2A	9965541月0-62:C>T-62:C>T	95.5	Goel et al. 2019	1B	cfd20	126.6	Tura et al. 2019	1B	stm0080tctg	41.1	Cabral et al. 2018	Tdurum_contig43943_56	1A	10.4434	Li et al. 2018	1A	IWB58391	51	Su et al. 2018	1A	BobWhite_c6558_234	3.95	Assanga et al. 2017	2D	Xsts183	35.8	Deng et al. 2017	1B	Xswes650	129	Yu et al. 2016	1A
												Hu et al. 2019	1A	Excalibur_c15098_591	34.518	Liu et al. 2019	2A	Kukni_ c4027_ 151	97.8	Goel et al. 2019	1B	barc181	153.5	Tura et al. 2019	1B	X1063043	41.1	Cabral et al. 2018	Tdurum_contig46413_680	1A	10.4434	Li et al. 2018	1A	IWB5807	52.1	Su et al. 2018	1A	Jagger_c8952_378	4.101	Assanga et al. 2017	2D	Xgwm265.1	43.6	Deng et al. 2017	1B	Xswes649	130	Yu et al. 2016	2A
												Hu et al. 2019	1A	GENE-0075_140	34.533	Liu et al. 2019	2A	1001 13672|F10-8:A>C-8:A>C	99.9	Goel et al. 2019	1B	barc313	165.4	Tura et al. 2019	1B	gwm0011	43	Cabral et al. 2018	Kukri_c11794_1044	1A	10.9929	Li et al. 2018	1A	IWB19958	54.3	Su et al. 2018	1A	Excalibur_c15885_1145	4.101	Assanga et al. 2017	4B	Xmag983	0	Deng et al. 2017	1B	Xswes98	131	Yu et al. 2016	2A
												Hu et al. 2019	1A	wsnp_Ex_c5634_9906981	34.606	Liu et al. 2019	2A	2285106|F0-20:7>C-20:T>C	100.3	Goel et al. 2019	1B	gdm36	173.2	Tura et al. 2019	1B	X1062366	45.6	Cabral et al. 2018	BS00010267_51	1A	10.9929	Li et al. 2018	1A	IWB3005	56.2	Su et al. 2018	1A	Excalibur_c95327_126	4.101	Assanga et al. 2017	4B	Xwmc238	6.5	Deng et al. 2017	2B	Xgwm210	0	Yu et al. 2016	2A
												Hu et al. 2019	1A	BS00041358_51	34.893	Liu et al. 2019	2A	wsnp_ Ex_ C15133_ 23323937	100.5	Goel et al. 2019	1B	psp3000	181	Tura et al. 2019	1B	cfe0257	46.2	Cabral et al. 2018	Excalibur_c21298_515	1A	10.9929	Li et al. 2018	1A	IWB7816	58	Su et al. 2018	1A	Ku_c3893_771	4.101	Assanga et al. 2017	4B	Xgwm495	8.6	Deng et al. 2017	2B	Xwmc382.2	3	Yu et al. 2016	2A
												Hu et al. 2019	1A	wsnp_Ex_c3572_6533892	35.066	Liu et al. 2019	2A	RFL_ Contig3509_ 229	114.5	Goel et al. 2019	1B	barc11101	192.9	Tura et al. 2019	1B	X1024654	46.2	Cabral et al. 2018	RAC875_c5831_1486	1A	11.5484	Li et al. 2018	1A	IWB50788	59.8	Su et al. 2018	1A	Kukri_c10308_342	4.101	Assanga et al. 2017	4B	Xgwm149	11.4	Deng et al. 2017	2B	Xwmc489.1	5	Yu et al. 2016	2A
												Hu et al. 2019	1A	BS00078977_51	35.338	Liu et al. 2019	2A	wsnp_ Ra_ c3378_ 6318431	115.1	Goel et al. 2019	1B	wmc419	214.5	Tura et al. 2019	1B	X1000810	52.7	Cabral et al. 2018	wPt-4666	1A	11.5484	Li et al. 2018	1A	IWB2320	61	Su et al. 2018	1A	Kukri_c29655_155	4.101	Assanga et al. 2017	4B	Xbarc163	15	Deng et al. 2017	2B	Xcwem5	5	Yu et al. 2016	2A
												Hu et al. 2019	1A	IAAV5391	35.396	Liu et al. 2019	2A	30644041月0-26:A>G -26:A>G	120.7	Goel et al. 2019	1B	wmc673	215	Tura et al. 2019	1B	gluB1x7	53.4	Cabral et al. 2018	wPt-6122	1A	11.5484	Li et al. 2018	1A	IWB7753	63.3	Su et al. 2018	1A	Kukri_c62848_106	4.101	Assanga et al. 2017	4B	Xwmc349	21.8	Deng et al. 2017	2B	Xwmc661	6	Yu et al. 2016	2A
												Hu et al. 2019	1A	Kukri_c6622_763	35.462	Liu et al. 2019	2A	12095271月0-26:T>C-26:T>C	120.9	Goel et al. 2019	1B	gwm140	237.9	Tura et al. 2019	1B	WPT-8279	53.4	Cabral et al. 2018	Excalibur_c29380_255	1A	11.5484	Li et al. 2018	1A	IWB22752	65.7	Su et al. 2018	1A	Kukri_c78742_122	4.101	Assanga et al. 2017	4B	Xwmc47	25.6	Deng et al. 2017	2B	Xwmc764	6	Yu et al. 2016	2A
												Hu et al. 2019	1A	BS00068036_51	35.511	Liu et al. 2019	2A	Ku_ c33884_ 267	121.7	Goel et al. 2019	1B	gwm259	257.7	Tura et al. 2019	1B	X1668384	54	Cabral et al. 2018	BS00003691	1A	11.5484	Li et al. 2018	1A	IWB58599	67.3	Su et al. 2018	1A	Kukri_rep_c68693_86	4.101	Assanga et al. 2017	4B	Xwmc413	28.7	Deng et al. 2017	2B	Xbarc200	48	Yu et al. 2016	2A
												Hu et al. 2019	1A	wsnp_Ex_c5634_9907829	35.62	Liu et al. 2019	2A	wsnp_ Ex_ c15681_ 24015303	122.3	Goel et al. 2019	1B	wmc728	278.8	Tura et al. 2019	1B	X1004052	55.2	Cabral et al. 2018	wmc818a	1A	12.1696	Li et al. 2018	1A	IWB675	69.3	Su et al. 2018	1A	RAC875_rep_c69640_88	4.101	Assanga et al. 2017	5A	Xwmc713	0	Deng et al. 2017	2B	Xwmc770	56	Yu et al. 2016	2A
												Hu et al. 2019	1A	wsnp_Ex_c44049_50205614	36.078	Liu et al. 2019	2A	Kukni_ rep_ c68300 216	123	Goel et al. 2019	1B	gpw20671	280.3	Tura et al. 2019	1B	X1089763	56.4	Cabral et al. 2018	RAC875_c97040_104	1A	12.1696	Li et al. 2018	1A	IWB27140	72.3	Su et al. 2018	1A	RFL_Contig4140_1183	4.101	Assanga et al. 2017	5A	Xmag694	8	Deng et al. 2017	2B	Xwmc179	65	Yu et al. 2016	2A
												Hu et al. 2019	1A	RAC875_c10506_434	36.095	Liu et al. 2019	2A	1056356|F0-43:C>T-43:C> T	123.2	Goel et al. 2019	1B	psp3100	307.4	Tura et al. 2019	1B	cfd0048a	57	Cabral et al. 2018	BS00074341_51	1A	12.1696	Li et al. 2018	1A	IWA2703	74.3	Su et al. 2018	1A	Tdurum_contig42289_936	4.101	Assanga et al. 2017	5A	Xmag1281	17.9	Deng et al. 2017	2B	Xbarc373	67	Yu et al. 2016	2A
												Hu et al. 2019	1A	wsnp_Ex_c1374_2630830	36.551	Liu et al. 2019	2A	Excalibur_ c7665_ 260	124.2	Goel et al. 2019	1D	cfd21	0	Tura et al. 2019	1B	wPt-0705	57	Cabral et al. 2018	Kukri_c5715_141	1A	12.1696	Li et al. 2018	1A	IWB9126	77.3	Su et al. 2018	1A	tplb0034h06_391	4.101	Assanga et al. 2017	5A	Xbarc56	26.3	Deng et al. 2017	2B	Xbarcl114	72	Yu et al. 2016	2A
												Hu et al. 2019	1A	RAC875_c9833_297	36.579	Liu et al. 2019	2A	wsnp_ Ex_ C11827_ ,18986376	125.3	Goel et al. 2019	1D	cfd61	3	Tura et al. 2019	1B	X1134677	60.2	Cabral et al. 2018	RAC875_c57939_175	1A	12.1696	Li et al. 2018	1A	IWB13749	79.2	Su et al. 2018	1A	wsnp_Ex_rep_c69266_68192766	4.101	Assanga et al. 2017	5A	Xgwm156.1	31.6	Deng et al. 2017	2B	Xwmc477	72	Yu et al. 2016	2A
												Hu et al. 2019	1A	RAC875_c26958_512	36.682	Liu et al. 2019	2A	RAC875_ rep_ _c107961_ 348	125.5	Goel et al. 2019	1D	cfd72	21	Tura et al. 2019	1B	X1034084	60.2	Cabral et al. 2018	Tdurum_contig42479_1624	1A	17.1584	Li et al. 2018	1A	IWB1728	81.1	Su et al. 2018	1A	BS00065430_51	13.726	Assanga et al. 2017	5A	Xbc19.1	37	Deng et al. 2017	2B	Xwmc175	75	Yu et al. 2016	2A
												Hu et al. 2019	1A	wsnp_Ex_c41969_48673442	37.064	Liu et al. 2019	2A	RFL_ Contig5031_ 526	153.5	Goel et al. 2019	1D	wmc429	32.6	Tura et al. 2019	1B	X1054439	66.1	Cabral et al. 2018	BobWhite_c27474_124	1A	17.1584	Li et al. 2018	1A	IWB72212	85.2	Su et al. 2018	1A	RAC875_c7031_488	20.071	Assanga et al. 2017	5A	Xgwm186	44.2	Deng et al. 2017	2B	Xgwm120	75	Yu et al. 2016	2A
												Hu et al. 2019	1A	CAP12_c6266_339	37.282	Liu et al. 2019	2A	1182397|F0-42:T>C-42:T>C	167.8	Goel et al. 2019	1D	cfd32	46.2	Tura et al. 2019	1B	X2263055	84.2	Cabral et al. 2018	BobWhite_c27474_65	1A	17.1584	Li et al. 2018	1A	IWB36711	89.1	Su et al. 2018	1A	wsnp_Ex_c7252_12452995	20.071					Deng et al. 2017	2B	Xbarc 1042	75	Yu et al. 2016	2A
												Hu et al. 2019	1A	IAAV749	37.812	Liu et al. 2019	2A	BS00066499_ _51	171	Goel et al. 2019	1D	wmc609	56.1	Tura et al. 2019	1B	wPt-9809	84.9	Cabral et al. 2018	BS00079071_51	1A	17.1584	Li et al. 2018	1A	IWB70079	91.1	Su et al. 2018	1A	BS00081680_51	22.195					Deng et al. 2017	2B	Xgwm388	75	Yu et al. 2016	2A
												Hu et al. 2019	1A	GENE-1214_288	38.016	Liu et al. 2019	2A	RFL_ Contig3005_ 669	174.6	Goel et al. 2019	1D	cfd83	72.2	Tura et al. 2019	1B	wPt-4129	95.4	Cabral et al. 2018	BS00081680_51	1A	17.1584	Li et al. 2018	1A	IWB11256	95.1	Su et al. 2018	1A	BS00064349_51	23.757					Deng et al. 2017	2B	Xbarc101	77	Yu et al. 2016	2A
												Hu et al. 2019	1A	BS00064679_51	38.218	Liu et al. 2019	2A	wsnp_ Ex c3695_ 6740339	175.4	Goel et al. 2019	1D	cfd27	83.6	Tura et al. 2019	1B	x1074770	96.7	Cabral et al. 2018	BS00081682_51	1A	17.1584	Li et al. 2018	1A	IWB14143	98	Su et al. 2018	1A	Kukri_c19247_53	23.757					Deng et al. 2017	2B	Xcwem55	85	Yu et al. 2016	2A
												Hu et al. 2019	1A	IACX542	38.245	Liu et al. 2019	2A	tplb0042o21_ 419	176.3	Goel et al. 2019	1D	gpw2162	94	Tura et al. 2019	1B	x1005607	100.1	Cabral et al. 2018	BS00103478_51	1A	17.1584	Li et al. 2018	1A	IWB45411	101.1	Su et al. 2018	1A	Kukri_c19247_711	23.757					Deng et al. 2017	2B	Xbarc129.1	89	Yu et al. 2016	2A
												Hu et al. 2019	1A	wsnp_BE585780A_Ta_2_1	38.363	Liu et al. 2019	2A	Kukni_ c9898_ ,1618	176.5	Goel et al. 2019	1D	wmc36	117.5	Tura et al. 2019	1B	x2263979	100.2	Cabral et al. 2018	Excalibur_c25175_512	1A	17.1584	Li et al. 2018	1A	IWB74944	107.1	Su et al. 2018	1A	RAC875_c78619_523	23.757					Deng et al. 2017	2B	Xwmc317	89	Yu et al. 2016	2A
												Hu et al. 2019	1A	BS00101116_51	38.387	Liu et al. 2019	2A	Excalibur_ ,rep_ C105614 ,172	176.7	Goel et al. 2019	1D	cfd19	132.4	Tura et al. 2019	1B	X1218477	104.7	Cabral et al. 2018	Excalibur_c25891_1402	1A	17.1584	Li et al. 2018	1A	IWB12340	116.1	Su et al. 2018	1A	Tdurum_contig10362_328	23.757					Deng et al. 2017	2B	Xwmc445.2	90	Yu et al. 2016	3A
												Hu et al. 2019	1A	RAC875_rep_c71967_180	38.582	Liu et al. 2019	2A	RAC875_ c19328_ 236	195.1	Goel et al. 2019	1D	gwm232	144.7	Tura et al. 2019	1B	wmc0044.R2	105.3	Cabral et al. 2018	Excalibur_c42185_156	1A	17.1584	Li et al. 2018	1A	IWB9993	119.5	Su et al. 2018	1A	Tdurum_contig15015_883	23.757					Deng et al. 2017	2B	Xgwm111	98	Yu et al. 2016	3A
												Hu et al. 2019	1A	Kukri_c8332_120	39.365	Liu et al. 2019	6D	Excalibur_ rep_ _C102994_ ,1689	0	Goel et al. 2019	1D	wmc153	153.4	Tura et al. 2019	1B	wmc0719	105.3	Cabral et al. 2018	Excalibur_c58154_84	1A	17.1584	Li et al. 2018	1A	IWA8051	127.4	Su et al. 2018	1A	wsnp_Ku_c56140_59771244	23.757					Deng et al. 2017	2B	Xgdm14	136	Yu et al. 2016	3A
												Hu et al. 2019	1A	Kukri_c20672_360	39.634	Liu et al. 2019	6D	wsnp_ RFL_ _Contig3661_ 3867818	6.2	Goel et al. 2019	2A	gwm614	0	Tura et al. 2019	1B	wmc0830	105.3	Cabral et al. 2018	IACX9458	1A	17.1584	Li et al. 2018	1B	IWB831 0	0	Su et al. 2018	1A	BS00098484_51	24.573					Deng et al. 2017	2D	Xgwm296	0	Yu et al. 2016	3A
												Hu et al. 2019	1A	Tdurum_contig42515_1245	40.087	Liu et al. 2019	6D	Tdurum_ contig10729_ 734	30.9	Goel et al. 2019	2A	cfa2086	1.4	Tura et al. 2019	1B	psp3100	110.5	Cabral et al. 2018	Kukri_c2121_1936	1A	17.1584	Li et al. 2018	1B	IWB13583	4.1	Su et al. 2018	1A	RFL_Contig1118_1073	25.235					Deng et al. 2017	2D	Xgwm261	0	Yu et al. 2016	3A
												Hu et al. 2019	1A	Excalibur_c28678_478	40.128	Liu et al. 2019	6D	BobWhite_ _C13202_ _399	31.3	Goel et al. 2019	2A	gwm448	21.1	Tura et al. 2019	1B	gpw3178	110.5	Cabral et al. 2018	RAC875_c23587_271	1A	17.1584	Li et al. 2018	1B	IWA1958	5.2	Su et al. 2018	1A	BS00077492_51	25.235					Deng et al. 2017	2D	Xwmc112	0.9	Yu et al. 2016	3A
												Hu et al. 2019	1A	RFL_Contig530_2305	40.301	Liu et al. 2019	6D	100108037|F0-5:G>A-5:G>A	32.7	Goel et al. 2019	2A	gwm359	29	Tura et al. 2019	1B	stm0658acag	110.5	Cabral et al. 2018	RAC875_c67106_97	1A	17.1584	Li et al. 2018	1B	IWB58616	6.4	Su et al. 2018	1A	RFL_Contig1118_65	25.235					Deng et al. 2017	2D	Xcfd53	1.6	Yu et al. 2016	3A
												Hu et al. 2019	1A	JD_c63991_766	40.515	Liu et al. 2019	6D	Excalibur_ c32219_ 843	33.1	Goel et al. 2019	2A	cfa223	36.3	Tura et al. 2019	1B	WMC0059	110.5	Cabral et al. 2018	wsnp_Ex_c19717_28713417	1A	17.1584	Li et al. 2018	1B	IWB11297	8.1	Su et al. 2018	1A	Excalibur_c48152_818	25.499					Deng et al. 2017	2D	Xwmc18	47.8	Yu et al. 2016	3A
												Hu et al. 2019	1A	Kukri_c23350_433	40.541	Liu et al. 2019	6D	RAC875_ c17011_ 717	34	Goel et al. 2019	2A	gpw4076	48.1	Tura et al. 2019	1B	X2266964	110.5	Cabral et al. 2018	wsnp_Ex_c7252_12453079	1A	17.1584	Li et al. 2018	1B	IWB16361	1900-01-09 07:12:00	Su et al. 2018	1A	wsnp_Ex_c2868_5293485	29.007					Deng et al. 2017	5D	Xwmc630.2	0	Yu et al. 2016	3A
												Hu et al. 2019	1A	GENE-0505_148	40.804	Liu et al. 2019	6D	RAC875_ c52566 _551	50.2	Goel et al. 2019	2A	gpw8034	54.9	Tura et al. 2019	1B	WPt-1770	114.4	Cabral et al. 2018	wsnp_Ex_c7442_12743707	1A	17.1584	Li et al. 2018	1B	IWB63621	11	Su et al. 2018	1A	BS00056550_51	29.007					Deng et al. 2017	5D	Xcfd40	2	Yu et al. 2016	3A
												Hu et al. 2019	1A	BS00004522_51	40.9	Liu et al. 2019	6D	100121442|F10-12:G>A-12:G>A	61.6	Goel et al. 2019	2A	barc124	59.6	Tura et al. 2019	1B	X1110815	114.4	Cabral et al. 2018	wsnp_Ex_c7965_13520238	1A	17.1584	Li et al. 2018	1B	IWB8598	11.3	Su et al. 2018	1A	tplb0062i18_102	29.961					Deng et al. 2017	5D	Xbarcl097	7	Yu et al. 2016	3A
												Hu et al. 2019	1A	wsnp_Ku_c4018_7333828	41.16	Liu et al. 2019	6D	100117519|F0-30:T>G- 30:T>G	62.5	Goel et al. 2019	2A	gwm122	68.6	Tura et al. 2019	1B	X1088442	115.7	Cabral et al. 2018	wPt-9266	1A	17.1584	Li et al. 2018	1B	IWA7399	13.1	Su et al. 2018	1A	TA001286-0611-w	31.099					Deng et al. 2017	5D	Xcfd8	36	Yu et al. 2016	3A
												Hu et al. 2019	1A	wsnp_Ex_c572_1138770	41.243	Liu et al. 2019	6D	981967|F10-67:T>C-67:T>C	63.3	Goel et al. 2019	2A	gwm425	82.1	Tura et al. 2019	1B	WPt-1973	119.5	Cabral et al. 2018	wPt-2311	1A	17.1584	Li et al. 2018	1B	IWB31615	15	Su et al. 2018	1A	CAP11_c3464_68	31.518					Deng et al. 2017	5D	Xbarc286	42	Yu et al. 2016	3A
												Hu et al. 2019	1A	RAC875_c86680_391	41.446	Liu et al. 2019	6D	1086563|F|0-10:C> T-10:C>T	65.7	Goel et al. 2019	2A	gwm382	89.4	Tura et al. 2019	1B	x1022619	119.5	Cabral et al. 2018	wPt-7872	1A	17.1584	Li et al. 2018	1B	IWB19967	17.2	Su et al. 2018	1A	BobWhite_c20902_177	32.445					Deng et al. 2017	5D	Xcfd57	47	Yu et al. 2016	3A
												Hu et al. 2019	1A	RAC875_c16080_777	41.606	Liu et al. 2019	6D	100091858|F10-52:C> T-52:C>T	68.2	Goel et al. 2019	2A	wmc827	110.4	Tura et al. 2019	1B	wmc0728	120.8	Cabral et al. 2018	IAAV7856	1A	18.4921	Li et al. 2018	1B	IWB45757	18.5	Su et al. 2018	1A	BS00059422_51	32.445					Deng et al. 2017	5D	Xbarc307	47	Yu et al. 2016	3A
												Hu et al. 2019	1A	Kukri_c88698_296	41.731	Liu et al. 2019	6D	1249163|F10-12:T>C-12:T>C	71.3	Goel et al. 2019	2A	gwm95	119.3					Cabral et al. 2018	BobWhite_c1890_712	1A	22.3889	Li et al. 2018	1B	IWB31844	19.1	Su et al. 2018	1A	BS00082567_51	32.445					Deng et al. 2017	5D	Xbarc347	52	Yu et al. 2016	3A
												Hu et al. 2019	1A	IACX3496	42.18	Liu et al. 2019	6D	2265648|F10-60:A>G-60:A>G	72.9	Goel et al. 2019	2A	gwm372	133.3					Cabral et al. 2018	wsnp_Ex_c5780_10154132	1A	22.9414	Li et al. 2018	1B	IWB61963	21	Su et al. 2018	1A	CAP12_c3074_192	32.467					Deng et al. 2017	5D	Xcfd101	53	Yu et al. 2016	3A
												Hu et al. 2019	1A	wsnp_Ku_c39878_48218985	42.385	Liu et al. 2019	6D	RAC875_ c57371_ 238	73.1	Goel et al. 2019	2A	gwm445	140.9					Cabral et al. 2018	BS00003572	1A	22.9414	Li et al. 2018	1B	IWB35083	23.3	Su et al. 2018	1A	tplb0025b13_150	33.228					Deng et al. 2017	5D	Xbarc320	62	Yu et al. 2016	3A
												Hu et al. 2019	1A	BS00033469_51	42.695	Liu et al. 2019	6D	3026931|F10-25:A>G-25:A>G	73.3	Goel et al. 2019	2A	cap36	147.3					Cabral et al. 2018	BS00005151	1A	22.9414	Li et al. 2018	1B	IWB5590	25	Su et al. 2018	1A	BS00026456_51	33.228					Deng et al. 2017	5D	Xwmc215 I	69	Yu et al. 2016	3A
												Hu et al. 2019	1A	BS00065676_51	42.962	Liu et al. 2019	6D	wsnp_ CAP12_ c720_ 382116	73.5	Goel et al. 2019	2A	barc279	157.6					Cabral et al. 2018	BobWhite_c3661_88	1A	22.9414	Li et al. 2018	1B	IWB25483	27.2	Su et al. 2018	1A	Excalibur_c58555_110	33.228					Deng et al. 2017	5D	Xbarc345	93	Yu et al. 2016	3A
												Hu et al. 2019	1A	RAC875_c2734_135	43.055	Liu et al. 2019	6D	9796101F|0-64:G>A-64:G>A	74.1	Goel et al. 2019	2A	gpw2018	169.5					Cabral et al. 2018	BobWhite_c46501_92	1A	22.9414	Li et al. 2018	1B	IWB12200	27.8	Su et al. 2018	1A	tplb0025b13_2054	33.228					Deng et al. 2017	5D	Xgdm63	94	Yu et al. 2016	3A
												Hu et al. 2019	1A	wsnp_Ra_c7818_13376644	43.181	Liu et al. 2019	6D	TA002853-0110-w	74.7	Goel et al. 2019	2A	mag2160	177.5					Cabral et al. 2018	BS00003761_51	1A	22.9414	Li et al. 2018	1B	IWB19579	29.2	Su et al. 2018	1A	wsnp_Ex_c12254_19574891	33.228					Deng et al. 2017	5D	Xcfd226	110	Yu et al. 2016	3A
												Hu et al. 2019	1A	Kukri_c10239_2186	43.199	Liu et al. 2019	6D	wsnp_ Ku_ c19587_ 29102203	74.9	Goel et al. 2019	2A	psp3153	197.5					Cabral et al. 2018	BS00003802_51	1A	22.9414	Li et al. 2018	1B	IWB69319	31.1	Su et al. 2018	1A	wsnp_Ku_c1818_3557408	33.228					Deng et al. 2017	5D	Xwmc765	122	Yu et al. 2016	3A
												Hu et al. 2019	1A	CAP11_c1972_285	43.616	Liu et al. 2019	6D	1 103476|F|0-51:T>C-51:T>C	88.8	Goel et al. 2019	2D	cfd51	0					Cabral et al. 2018	BS00022738_51	1A	22.9414	Li et al. 2018	1B	IWB67884	33	Su et al. 2018	1A	RAC875_c29540_413	33.557					Deng et al. 2017	6A	Xgwm459	0	Yu et al. 2016	3A
												Hu et al. 2019	1A	RAC875_c41275_131	43.904	Liu et al. 2019	6D	Excalibur_ c16818_ 806	111.3	Goel et al. 2019	2D	wmc503	13.4					Cabral et al. 2018	BS00062578_51	1A	22.9414	Li et al. 2018	1B	IWB36104	34.8	Su et al. 2018	1A	wsnp_Ex_rep_c108951_91954190	33.557					Deng et al. 2017	6A	Xgwm334	11	Yu et al. 2016	3A
												Hu et al. 2019	1A	Excalibur_rep_c66449_1588	44.061	Liu et al. 2019	6D	RAC875_ c25839_ 225	124.4	Goel et al. 2019	2D	cfd43	28.9					Cabral et al. 2018	BS00064608_51	1A	22.9414	Li et al. 2018	1B	IWB7534	36.5	Su et al. 2018	1A	wsnp_Ex_c10657_17376448	34.525					Deng et al. 2017	6A	Xbarc023	31	Yu et al. 2016	3A
												Hu et al. 2019	1A	Kukri_c3582_87	44.222	Liu et al. 2019	6D	GENE-4153_ 101	124.5	Goel et al. 2019	2D	cfd36	40.3					Cabral et al. 2018	BS00065419_51	1A	22.9414	Li et al. 2018	1B	IWB75197	37.5	Su et al. 2018	1A	Xgwm136	37.265					Deng et al. 2017	6A	Xbarc1077	41	Yu et al. 2016	3A
												Hu et al. 2019	1A	wsnp_JD_c13903_13781269	44.35	Liu et al. 2019	6D	Ra_ _c106775_ _711	129.6	Goel et al. 2019	2D	barc168	55.3					Cabral et al. 2018	BS00107852_51	1A	22.9414	Li et al. 2018	1B	IWB27264	39	Su et al. 2018	1A	Kukri_c93273_605	38.956					Deng et al. 2017	6A	Xbarc1165	41	Yu et al. 2016	3A
												Hu et al. 2019	1A	BS00087601_51	44.486	Liu et al. 2019	6D	1237534|F10-49:T>C-49:T>C	130.3	Goel et al. 2019	2D	cfd11	66.2					Cabral et al. 2018	Excalibur_c110483_103	1A	22.9414	Li et al. 2018	1B	IWB13769	42.6	Su et al. 2018	1A	wsnp_Ku_c11896_19337444	39.803					Deng et al. 2017	6A	Xgwm82	43	Yu et al. 2016	3A
												Hu et al. 2019	1A	BobWhite_rep_c63278_349	44.503	Liu et al. 2019	6D	D_ F5MV3MU01ADAXD_ ,197	131.8	Goel et al. 2019	2D	gwm484	76.2					Cabral et al. 2018	Excalibur_c18694_273	1A	22.9414	Li et al. 2018	1B	IWB2681	44.4	Su et al. 2018	1A	BS00009885_51	40.675					Deng et al. 2017	6A	Xwmc182	43	Yu et al. 2016	4A
												Hu et al. 2019	1A	BS00067420_51	44.665	Liu et al. 2019	6D	225061 1|F0-53:C>G-53:C>G	132	Goel et al. 2019	2D	gwm102	98.9					Cabral et al. 2018	Excalibur_c22642_90	1A	22.9414	Li et al. 2018	1B	IWB35053	46.6	Su et al. 2018	1A	TA006139-0953	41.836					Deng et al. 2017	6A	Xbarc1055	43	Yu et al. 2016	4A
												Hu et al. 2019	1A	Ex_c16529_304	44.938	Liu et al. 2019	6D	D_ GCE8AKX01CWZ8Z_ ,144	132.2	Goel et al. 2019	2D	gwm349	115.3					Cabral et al. 2018	Excalibur_c44711_453	1A	22.9414	Li et al. 2018	1B	IWB53315	48.2	Su et al. 2018	1A	Excalibur_rep_c106065_511	42.83					Deng et al. 2017	6A	Xwmc553	54	Yu et al. 2016	4A
												Hu et al. 2019	1A	BS00021864_51	45.136	Liu et al. 2019	6D	12185931F0-15:A>G-15:A>G	133	Goel et al. 2019	2D	cfd233	128.7					Cabral et al. 2018	Excalibur_c55677_217	1A	22.9414	Li et al. 2018	1B	IWB47886	50.1	Su et al. 2018	1A	Kukri_c7436_2259	44.213					Deng et al. 2017	6A	Xgwm732	81	Yu et al. 2016	4A
												Hu et al. 2019	1A	Ra_c105707_788	45.403	Liu et al. 2019	6D	1095962|F10- 30:A>G 30:A>G	133.7	Goel et al. 2019	2D	gwm539	145.2					Cabral et al. 2018	Excalibur_rep_c92985_510	1A	22.9414	Li et al. 2018	1B	IWB12504	54.1	Su et al. 2018	1A	Excalibur_c11941_675	44.495					Deng et al. 2017	6A	Xcfe179.2	84	Yu et al. 2016	4A
												Hu et al. 2019	1A	Excalibur_c34697_831	45.542	Liu et al. 2019	6D	1 188959|F|0-21:G>T-21:G>T	134.3	Goel et al. 2019	2D	cfd44	156.2					Cabral et al. 2018	Excalibur_rep_c92985_618	1A	22.9414	Li et al. 2018	1B	IWB3634	58.1	Su et al. 2018	1A	wsnp_Ex_c5323_9408829	44.608					Deng et al. 2017	6A	Xcfe179.1	87	Yu et al. 2016	4A
												Hu et al. 2019	1A	BS00089894_51	45.672	Liu et al. 2019	6D	wsnp_ BQ161779D_ _Ta_ 2_ _1	135.2	Goel et al. 2019	2D	barc59	173.7					Cabral et al. 2018	GENE-0211_139	1A	22.9414	Li et al. 2018	1B	IWB10606	62.2	Su et al. 2018	1A	BS00078982_51	44.752					Deng et al. 2017	6A	Xswes170.2	117	Yu et al. 2016	4A
												Hu et al. 2019	1A	RAC875_c31276_1128	45.848	Liu et al. 2019	6D	IAA V8527	135.5	Goel et al. 2019	2D	gdm6	181.5					Cabral et al. 2018	GENE-0249_122	1A	22.9414	Li et al. 2018	1B	IWB6808	66	Su et al. 2018	1A	BS00105601_51	44.752									Yu et al. 2016	4A
												Hu et al. 2019	1A	wsnp_Ex_c55986_58282517	45.854	Liu et al. 2019	6D	D_ _wsnpbe497701_ Contig1_ 2	135.9	Goel et al. 2019	2D	gdm87	185.4					Cabral et al. 2018	GENE-0249_161	1A	22.9414	Li et al. 2018	1B	IWB66920	70.1	Su et al. 2018	1A	wsnp_Ex_c5323_9409407	44.959									Yu et al. 2016	4A
												Hu et al. 2019	1A	BS00031066_51	46.242	Liu et al. 2019	6D	D_ GBUVHFX01DKBFS_ _217	136.1	Goel et al. 2019	2D	gpw2128	196.4					Cabral et al. 2018	IAAV1469	1A	22.9414	Li et al. 2018	1B	IWB3934	75	Su et al. 2018	1A	RAC875_c8245_272	45.037									Yu et al. 2016	4A
												Hu et al. 2019	1A	BS00002216_51	46.784	Liu et al. 2019	6D	GENE-3780_ 580	136.3	Goel et al. 2019	3B	barc75	0					Cabral et al. 2018	IAAV3168	1A	22.9414	Li et al. 2018	1B	IWB1371	77.4	Su et al. 2018	1A	Kukri_rep_c101218_200	45.901									Yu et al. 2016	4A
												Hu et al. 2019	1A	Kukri_c25215_124	47.31	Liu et al. 2019	6D	1217935|F0-41:C>A-41:C>A	136.4	Goel et al. 2019	3B	barc147	14.9					Cabral et al. 2018	IACX5892	1A	22.9414	Li et al. 2018	1B	IWB36563	79.1	Su et al. 2018	1A	wsnp_Ex_c18196_27006489	45.901									Yu et al. 2016	4A
												Hu et al. 2019	1A	IAAV5535	48.395	Liu et al. 2019	6D	wsnp_ RFL_ Contig4170_ 4764493	136.6	Goel et al. 2019	3B	gwm493	17.1					Cabral et al. 2018	Kukri_c18434_200	1A	22.9414	Li et al. 2018	1B	IWB13106	81.3	Su et al. 2018	1A	Excalibur_c65227_444	46.144									Yu et al. 2016	4A
												Hu et al. 2019	1A	BS00067652_51	48.667	Liu et al. 2019	6D	2249478|F|0-45:T>G 45:T>G	137	Goel et al. 2019	3B	barc102	33					Cabral et al. 2018	Kukri_c24144_1568	1A	22.9414	Li et al. 2018	1B	IWA3097	82.3	Su et al. 2018	1A	BS00096054_51	46.692									Yu et al. 2016	4A
												Hu et al. 2019	1A	tplb0045g22_418	48.922	Liu et al. 2019	6D	15328013|F|0-32:G>A-32:G>A	140.2	Goel et al. 2019	3B	cfp78	48					Cabral et al. 2018	Kukri_rep_c72397_600	1A	22.9414	Li et al. 2018	1B	IWB58901	82.9	Su et al. 2018	1A	Excalibur_c7026_2635	46.926									Yu et al. 2016	4A
												Hu et al. 2019	1A	CAP7_c1083_283	49.047	Liu et al. 2019	6D	wsnp_ Ex_ C1690_ 3206784	140.5	Goel et al. 2019	3B	cfb3119	62.8					Cabral et al. 2018	RAC875_c13012_1598	1A	22.9414	Li et al. 2018	1B	IWB13876	83.9	Su et al. 2018	1A	Kukri_c13136_1363	47.016									Yu et al. 2016	4A
												Hu et al. 2019	1A	BS00021728_51	49.68					Goel et al. 2019	3B	cfb3296	80.8					Cabral et al. 2018	RAC875_c13012_174	1A	22.9414	Li et al. 2018	1B	IWB43139	85.1	Su et al. 2018	1A	RAC875_c14926_589	47.118									Yu et al. 2016	4A
												Hu et al. 2019	1A	IACX5960	49.873					Goel et al. 2019	3B	cfp56	87.8					Cabral et al. 2018	RAC875_c2654_1817	1A	22.9414	Li et al. 2018	1B	IWB631	86.3	Su et al. 2018	1A	wsnp_Ex_rep_c68857_67737959	47.739									Yu et al. 2016	4A
												Hu et al. 2019	1A	BS00100120_51	50.194					Goel et al. 2019	3B	gpw7774	97.6					Cabral et al. 2018	RAC875_c37934_285	1A	22.9414	Li et al. 2018	1B	IWB31739	90	Su et al. 2018	1A	wsnp_Ex_rep_c67665_66326492	47.994									Yu et al. 2016	4A
												Hu et al. 2019	1A	Excalibur_c15357_432	50.462					Goel et al. 2019	3B	cfb3530	109.8					Cabral et al. 2018	RAC875_c64603_663	1A	22.9414	Li et al. 2018	1B	IWB69144	94.2	Su et al. 2018	1A	BobWhite_c44224_71	48.265									Yu et al. 2016	5A
												Hu et al. 2019	1A	wsnp_BM140362A_Ta_2_2	50.854					Goel et al. 2019	3B	gwm389	125.5					Cabral et al. 2018	TA005995-0488	1A	22.9414	Li et al. 2018	1B	IWB9292	99.1	Su et al. 2018	1A	wsnp_CAP12_c2438_1180601	48.932									Yu et al. 2016	5A
												Hu et al. 2019	1A	Kukri_c37726_285	54.883					Goel et al. 2019	3B	wmc222	132.5					Cabral et al. 2018	Tdurum_contig11756_1415	1A	22.9414	Li et al. 2018	1B	IWB56410	105.5	Su et al. 2018	1A	Tdurum_contig8382_300	49.21									Yu et al. 2016	5A
												Hu et al. 2019	1A	wsnp_Ku_c23012_32893918	60.173					Goel et al. 2019	3B	gwm533	145.8					Cabral et al. 2018	Tdurum_contig11756_264	1A	22.9414	Li et al. 2018	1B	IWB72247	111	Su et al. 2018	1A	Excalibur_rep_c85213_146	49.582									Yu et al. 2016	5A
												Hu et al. 2019	1A	Excalibur_c1845_718	63.303					Goel et al. 2019	3B	cfp1676	159.2					Cabral et al. 2018	Tdurum_contig11756_458	1A	22.9414	Li et al. 2018	1B	IWB18583	119.3	Su et al. 2018	1A	Kukri_c82555_88	49.886									Yu et al. 2016	5A
												Hu et al. 2019	1A	Ku_c8992_405	67.151					Goel et al. 2019	3B	cfb3034	160.2					Cabral et al. 2018	Tdurum_contig20965_1446	1A	22.9414	Li et al. 2018	1D	IWB34338	0	Su et al. 2018	1A	Kukri_c46010_146	50.246									Yu et al. 2016	5A
												Hu et al. 2019	1A	GENE-0069_468	72.152					Goel et al. 2019	3B	cfp3430	174.1					Cabral et al. 2018	BS00003761	1A	22.9414	Li et al. 2018	1D	IWB16714	2.7	Su et al. 2018	1A	IACX1465	50.246									Yu et al. 2016	5A
												Hu et al. 2019	1A	Kukri_c24570_282	73.086					Goel et al. 2019	3B	Cfp5109	185.5					Cabral et al. 2018	wsnp_Ex_c64327_63176640	1A	22.9414	Li et al. 2018	1D	IWB3277	4	Su et al. 2018	1A	Tdurum_contig13946_241	50.246									Yu et al. 2016	5A
												Hu et al. 2019	1A	RAC875_c12348_720	74.8					Goel et al. 2019	3B	gpw4207	197.3					Cabral et al. 2018	Excalibur_c10065_570	1A	22.9414	Li et al. 2018	1D	IWB28345	7.2	Su et al. 2018	1A	Tdurum_contig77289_179	50.246									Yu et al. 2016	5A
												Hu et al. 2019	1A	IACX1873	75.428					Goel et al. 2019	3B	gwm566	212.3					Cabral et al. 2018	Tdurum_contig17530_822	1A	22.9414	Li et al. 2018	1D	IWB211	9.3	Su et al. 2018	1A	wsnp_BE586140A_Ta_2_1	50.246									Yu et al. 2016	5A
												Hu et al. 2019	1A	BS00009104_51	79.586					Goel et al. 2019	3B	gwm285	227.9					Cabral et al. 2018	Tdurum_contig30956_537	1A	22.9414	Li et al. 2018	1D	IWB24540	13.3	Su et al. 2018	1A	wsnp_Ex_c31983_40709607	50.246									Yu et al. 2016	5A
												Hu et al. 2019	1A	BS00110130_51	81.135					Goel et al. 2019	3B	wmc85	241.4					Cabral et al. 2018	Excalibur_c3941_537	1A	23.4878	Li et al. 2018	1D	IWA2268	15.4	Su et al. 2018	1A	Tdurum_contig43360_1592	50.657									Yu et al. 2016	5A
												Hu et al. 2019	1A	Tdurum_contig11106_340	87.989					Goel et al. 2019	3B	wmc1	255.2					Cabral et al. 2018	Ex_c3941_906	1A	23.4878	Li et al. 2018	1D	IWA817	17.6	Su et al. 2018	1A	Kukri_c23382_1431	50.687									Yu et al. 2016	5A
												Hu et al. 2019	1A	RAC875_c7563_273	88.544					Goel et al. 2019	3B	barc77	265.7					Cabral et al. 2018	wsnp_Ku_c11896_19337444	1A	28.4218	Li et al. 2018	1D	IWB10735	20	Su et al. 2018	1A	Tdurum_contig61515_522	50.992									Yu et al. 2016	5A
												Hu et al. 2019	1A	RAC875_c34515_343	100.217					Goel et al. 2019	3B	cfb3033	270.7					Cabral et al. 2018	RAC875_c14926_589	1A	28.4218	Li et al. 2018	1D	IWB15189	24.8	Su et al. 2018	1A	Excalibur_c7237_1208	51.048									Yu et al. 2016	5A
												Hu et al. 2019	1A	wsnp_Ex_c18499_27344859	106.626					Goel et al. 2019	3B	barc131	285.2					Cabral et al. 2018	wmc24	1A	28.4218	Li et al. 2018	1D	IWB39289	28	Su et al. 2018	1A	Excalibur_c7237_1084	51.048									Yu et al. 2016	5A
												Hu et al. 2019	1A	BS00023114_51	107.69					Goel et al. 2019	3B	barc268	300.1					Cabral et al. 2018	BobWhite_c23763_350	1A	28.4218	Li et al. 2018	1D	IWB66043	30.6	Su et al. 2018	1A	BobWhite_c4499_153	51.291									Yu et al. 2016	5A
												Hu et al. 2019	1A	Ex_c3201_1046	110.38					Goel et al. 2019	3B	cfb3330	315.1					Cabral et al. 2018	BobWhite_c4384_262	1A	28.4218	Li et al. 2018	1D	IWB5401	32.2	Su et al. 2018	1A	Tdurum_contig61515_259	51.577									Yu et al. 2016	5A
												Hu et al. 2019	1A	BS00068074_51	112.909					Goel et al. 2019	3B	gpw1107	330.4					Cabral et al. 2018	BobWhite_c48591_394	1A	28.4218	Li et al. 2018	1D	IWA6675	35.1	Su et al. 2018	1A	IAAV5252	51.732									Yu et al. 2016	5A
												Hu et al. 2019	1A	wsnp_Ra_c6891_11974621	113.463					Goel et al. 2019	3B	Cfp1632	343.8					Cabral et al. 2018	Excalibur_c10689_254	1A	28.4218	Li et al. 2018	1D	IWB5767	37.6	Su et al. 2018	1A	RAC875_c89908_105	52.019									Yu et al. 2016	5A
												Hu et al. 2019	1A	BS00107935_51	114.376					Goel et al. 2019	3B	cfp7	358.4					Cabral et al. 2018	Excalibur_c7026_2635	1A	28.4218	Li et al. 2018	1D	IWB36019	39.4	Su et al. 2018	1A	BS00029346_51	52.019									Yu et al. 2016	5A
												Hu et al. 2019	1A	RAC875_c52947_84	114.729					Goel et al. 2019	3B	cfb3059	374.4					Cabral et al. 2018	Kukri_c13136_1363	1A	28.4218	Li et al. 2018	1D	IWB10694	41.1	Su et al. 2018	1A	Tdurum_contig47183_205	52.202									Yu et al. 2016	5A
												Hu et al. 2019	1A	BobWhite_c12305_959	114.953					Goel et al. 2019	3B	cfb3375	388.4					Cabral et al. 2018	Kukri_c13593_203	1A	28.4218	Li et al. 2018	1D	IWB16859	43.1	Su et al. 2018	1A	Tdurum_contig11004_613	52.713									Yu et al. 2016	5A
												Hu et al. 2019	1A	wsnp_Ex_c11939_19147790	115.053					Goel et al. 2019	3B	cwem4d	405.5					Cabral et al. 2018	wsnp_JD_c9290_10155594	1A	28.4218	Li et al. 2018	1D	IWB7075	45.1	Su et al. 2018	1A	IAAV8824	54.429									Yu et al. 2016	5A
												Hu et al. 2019	1A	wsnp_Ku_c5687_10068945	115.722					Goel et al. 2019	3B	gpw1120	423.2					Cabral et al. 2018	BS00084022_51	1A	31.7052	Li et al. 2018	1D	IWB49565	47.5	Su et al. 2018	1A	wsnp_Ex_c49829_54319220	54.429									Yu et al. 2016	5A
												Hu et al. 2019	1A	wsnp_Ex_c271_521429	115.913					Goel et al. 2019	3D	cfd127	0					Cabral et al. 2018	BobWhite_c4499_153	1A	31.7052	Li et al. 2018	1D	IWB15740	50.7	Su et al. 2018	1A	wsnp_Ex_rep_c103087_88124573	55.112									Yu et al. 2016	5A
												Hu et al. 2019	1A	wsnp_Ex_rep_c103474_88421290	117.121					Goel et al. 2019	3D	cfd55	16.1					Cabral et al. 2018	Tdurum_contig50355_685	1A	32.2517	Li et al. 2018	1D	IWB41947	52.8	Su et al. 2018	1A	Ex_c17168_1216	55.588									Yu et al. 2016	5A
												Hu et al. 2019	1A	IAAV6100	117.152					Goel et al. 2019	3D	cfd79	21.5					Cabral et al. 2018	barc119	1A	32.2517	Li et al. 2018	1D	IWB8432	54.1	Su et al. 2018	1A	Ra_c10580_1629	56.069									Yu et al. 2016	5A
												Hu et al. 2019	1A	wsnp_Ex_c15377_23637176	117.19					Goel et al. 2019	3D	cfd64	29.6					Cabral et al. 2018	Excalibur_rep_c85213_146	1A	32.2517	Li et al. 2018	1D	IWB34880	56.3	Su et al. 2018	1A	GENE-0053_224	56.751									Yu et al. 2016	5A
												Hu et al. 2019	1A	RAC875_c62550_470	117.74					Goel et al. 2019	3D	barc1119	34.7					Cabral et al. 2018	Tdurum_contig29280_216	1A	32.2517	Li et al. 2018	1D	IWB38561	58.9	Su et al. 2018	1A	Ex_c2389_1834	57.287									Yu et al. 2016	5A
												Hu et al. 2019	1A	Kukri_c17412_1249	117.804					Goel et al. 2019	3D	gwm383	43.5					Cabral et al. 2018	Tdurum_contig50355_269	1A	32.2517	Li et al. 2018	1D	IWB12483	60.3	Su et al. 2018	1A	IAAV8664	57.287									Yu et al. 2016	5A
												Hu et al. 2019	1A	BS00070695_51	118.348					Goel et al. 2019	3D	wmc741	53.7					Cabral et al. 2018	Excalibur_c12215_352	1A	36.6345	Li et al. 2018	1D	IWB34905	62.4	Su et al. 2018	1A	wsnp_Ex_c14733_22819625	57.379									Yu et al. 2016	5A
												Hu et al. 2019	1A	IAAV4238	118.941					Goel et al. 2019	3D	cfd4	59.2					Cabral et al. 2018	BS00067339_51	1A	36.6345	Li et al. 2018	1D	IWB6781	64	Su et al. 2018	1A	wsnp_Ex_c6826_11775106	57.379									Yu et al. 2016	5A
												Hu et al. 2019	1A	Kukri_c36428_156	119.22					Goel et al. 2019	3D	barc125	72.5					Cabral et al. 2018	Kukri_c4900_2435	1A	36.6345	Li et al. 2018	1D	IWB205	65.4	Su et al. 2018	1A	Excalibur_c2389_90	58.697									Yu et al. 2016	5A
												Hu et al. 2019	1A	BS00062759_51	119.356					Goel et al. 2019	3D	cfd9	91.4					Cabral et al. 2018	wPt-8172	1A	36.6345	Li et al. 2018	1D	IWB18403	67.4	Su et al. 2018	1A	BS00068036_51	58.834									Yu et al. 2016	5A
												Hu et al. 2019	1A	BS00063847_51	120.016					Goel et al. 2019	3D	barc71	11.2					Cabral et al. 2018	wmc11b	1A	41.4771	Li et al. 2018	1D	IWB26970	69.6	Su et al. 2018	1A	wsnp_JD_c722_1080592	59.142									Yu et al. 2016	5A
												Hu et al. 2019	1A	IAAV4435	121.212					Goel et al. 2019	3D	wmc443	126.5					Cabral et al. 2018	wmc278	1A	41.4771	Li et al. 2018	1D	IWB74356	72.6	Su et al. 2018	1A	Excalibur_c7692_139	59.421									Yu et al. 2016	6A
												Hu et al. 2019	1A	BS00067741_51	124.151					Goel et al. 2019	3D	barc321	139.4					Cabral et al. 2018	wmc469	1A	41.4771	Li et al. 2018	1D	IWB5900	74.1	Su et al. 2018	1A	Ra_c7062_430	59.421									Yu et al. 2016	6A
												Hu et al. 2019	1A	wsnp_Ex_c1255_2411550	124.225					Goel et al. 2019	3D	gpw4136	156.6					Cabral et al. 2018	wmc611b	1A	41.4771	Li et al. 2018	1D	IWB24064	74.3	Su et al. 2018	1A	wsnp_Ex_rep_c67763_66441222	59.421									Yu et al. 2016	6A
												Hu et al. 2019	1A	wsnp_Ex_rep_c67474_66076379	125.076					Goel et al. 2019	3D	barc323	178.2					Cabral et al. 2018	wmc826a	1A	41.4771	Li et al. 2018	1D	IWB13173	79.4	Su et al. 2018	1A	IAAV742	59.506									Yu et al. 2016	6A
												Hu et al. 2019	1A	Excalibur_c65931_377	125.098					Goel et al. 2019	3D	barc1040	195.9					Cabral et al. 2018	wsnp_Ex_c29914_38896441	1A	41.4771	Li et al. 2018	1D	IWB6677	81.2	Su et al. 2018	1A	IACX7695	59.725									Yu et al. 2016	6A
												Hu et al. 2019	1A	wsnp_Ex_c2918_5381441	125.311					Goel et al. 2019	3D	gwm314	216					Cabral et al. 2018	gpw5288a	1A	42.8108	Li et al. 2018	1D	IWB5670	83.2	Su et al. 2018	1A	Kukri_rep_c101022_1595	60.322									Yu et al. 2016	6A
												Hu et al. 2019	1A	tplb0059i08_441	125.32					Goel et al. 2019	3D	cfd211	235.5					Cabral et al. 2018	wsnp_Ra_rep_c74936_72685894	1A	42.8108	Li et al. 2018	1D	IWB22895	88.6	Su et al. 2018	1A	wsnp_Ex_c50235_54588957	60.434									Yu et al. 2016	6A
												Hu et al. 2019	1A	BS00021780_51	125.493					Goel et al. 2019	3D	wmc552	236					Cabral et al. 2018	barc240a	1A	42.8108	Li et al. 2018	1D	IWB64147	90.2	Su et al. 2018	1A	BobWhite_c24113_529	60.434									Yu et al. 2016	6A
												Hu et al. 2019	1A	RAC875_rep_c71921_672	125.502					Goel et al. 2019	3D	barc1161	252.1					Cabral et al. 2018	BS00000108	1A	42.8108	Li et al. 2018	1D	IWB62453	92.7	Su et al. 2018	1A	BobWhite_c45409_389	60.434									Yu et al. 2016	6A
												Hu et al. 2019	1A	wsnp_Ex_c3887_7051325	125.541					Goel et al. 2019	3D	cfd213	253.1					Cabral et al. 2018	BS00000271	1A	42.8108	Li et al. 2018	1D	IWB49684	93.2	Su et al. 2018	1A	BS00003813_51	60.434									Yu et al. 2016	6A
												Hu et al. 2019	1A	CAP11_c1115_150	125.922					Goel et al. 2019	3D	gpw1149	254.6					Cabral et al. 2018	BS00010595	1A	42.8108	Li et al. 2018	1D	IWB49480	94.5	Su et al. 2018	1A	BS00010004_51	60.434									Yu et al. 2016	6A
												Hu et al. 2019	1A	BS00032855_51	126.405					Goel et al. 2019	4A	ca2026	0					Cabral et al. 2018	gpw2006	1A	42.8108	Li et al. 2018	2A	IWB11443	0	Su et al. 2018	1A	BS00010287_51	60.434									Yu et al. 2016	6A
												Hu et al. 2019	1B	BS00073199_51	0					Goel et al. 2019	4A	wmc491	16.3					Cabral et al. 2018	gpw3171	1A	42.8108	Li et al. 2018	2A	IWB12646	6.2	Su et al. 2018	1A	BS00026917_51	60.434									Yu et al. 2016	6A
												Hu et al. 2019	1B	Tdurum_contig60037_441	3.507					Goel et al. 2019	4A	wmc650	40.3					Cabral et al. 2018	BobWhite_c1488_504	1A	42.8108	Li et al. 2018	2A	IWB71137	12.2	Su et al. 2018	1A	BS00028874_51	60.434									Yu et al. 2016	6A
												Hu et al. 2019	1B	GENE-4091_147	5.105					Goel et al. 2019	4A	barc170	66.6					Cabral et al. 2018	BobWhite_c46349_402	1A	42.8108	Li et al. 2018	2A	IWB21441	18	Su et al. 2018	1A	BS00033760_51	60.434									Yu et al. 2016	6A
												Hu et al. 2019	1B	Tdurum_contig98378_452	5.923					Goel et al. 2019	4A	wmc468	95.4					Cabral et al. 2018	BobWhite_c8428_346	1A	42.8108	Li et al. 2018	2A	IWB42945	24.6	Su et al. 2018	1A	BS00037007_51	60.434									Yu et al. 2016	6A
												Hu et al. 2019	1B	wsnp_Ku_rep_c70742_70379526	7.401					Goel et al. 2019	4A	wmnc161	116.5					Cabral et al. 2018	BS00062715_51	1A	42.8108	Li et al. 2018	2A	IWB52303	26.3	Su et al. 2018	1A	BS00066308_51	60.434									Yu et al. 2016	6A
												Hu et al. 2019	1B	tplb0059c20_2221	28.632					Goel et al. 2019	4A	wmc718	134.6					Cabral et al. 2018	CAP11_c6014_160	1A	42.8108	Li et al. 2018	2A	IWB58559	27.6	Su et al. 2018	1A	BS00067277_51	60.434									Yu et al. 2016	6A
												Hu et al. 2019	1B	BS00066443_51	28.639					Goel et al. 2019	4A	wmc262	148.4					Cabral et al. 2018	CAP12_c6266_187	1A	42.8108	Li et al. 2018	2A	IWB10255	30	Su et al. 2018	1A	BS00067330_51	60.434									Yu et al. 2016	6A
												Hu et al. 2019	1B	BS00047700_51	28.645					Goel et al. 2019	4A	wmc313	168.7					Cabral et al. 2018	CAP12_c6266_298	1A	42.8108	Li et al. 2018	2A	IWB59949	32.7	Su et al. 2018	1A	BS00076538_51	60.434									Yu et al. 2016	6A
												Hu et al. 2019	1B	IAAV4866	29.29					Goel et al. 2019	4A	gpw4182	176.6					Cabral et al. 2018	CAP12_c6266_339	1A	42.8108	Li et al. 2018	2A	IWB21847	33.7	Su et al. 2018	1A	BS00077504_51	60.434									Yu et al. 2016	6A
												Hu et al. 2019	1B	wsnp_CAP7_c940_480745	29.787					Goel et al. 2019	4A	barc236	200.3					Cabral et al. 2018	CAP7_c3269_236	1A	42.8108	Li et al. 2018	2A	IWB3425	33.7	Su et al. 2018	1A	CAP11_c2984_419	60.434									Yu et al. 2016	6A
												Hu et al. 2019	1B	Tdurum_contig63991_280	30.016					Goel et al. 2019	4A	barc246 2	219.9					Cabral et al. 2018	CAP8_c2843_226	1A	42.8108	Li et al. 2018	2A	IWB4499	35.1	Su et al. 2018	1A	Ex_c2389_1828	60.434									Yu et al. 2016	6A
												Hu et al. 2019	1B	Tdurum_contig13391_680	30.198					Goel et al. 2019	4A	barc1047	236					Cabral et al. 2018	CAP8_c4897_397	1A	42.8108	Li et al. 2018	2A	IWB55871	38.8	Su et al. 2018	1A	Ex_c27351_850	60.434									Yu et al. 2016	7A
												Hu et al. 2019	1B	wsnp_JD_c8926_9848514	31.51					Goel et al. 2019	4A	cwem35b	259.7					Cabral et al. 2018	CAP8_rep_c7560_159	1A	42.8108	Li et al. 2018	2A	IWB27207	41	Su et al. 2018	1A	Excalibur_c35312_109	60.434									Yu et al. 2016	7A
												Hu et al. 2019	1B	Tdurum_contig65023_587	31.99					Goel et al. 2019	4A	gpw1010	282.9					Cabral et al. 2018	Ex_c12763_662	1A	42.8108	Li et al. 2018	2A	IWB2525	43.5	Su et al. 2018	1A	Excalibur_c44731_1000	60.434									Yu et al. 2016	7A
												Hu et al. 2019	1B	BS00023142_51	32.279					Goel et al. 2019	4B	barc20	0					Cabral et al. 2018	Ex_c5759_628	1A	42.8108	Li et al. 2018	2A	IWB66004	45.1	Su et al. 2018	1A	Excalibur_c62832_446	60.434									Yu et al. 2016	7A
												Hu et al. 2019	1B	wsnp_Ex_c2004_3770146	32.397					Goel et al. 2019	4B	gwm368	20.6					Cabral et al. 2018	Ex_c5759_663	1A	42.8108	Li et al. 2018	2A	IWB3592	48	Su et al. 2018	1A	GENE-0561_311	60.434									Yu et al. 2016	7A
												Hu et al. 2019	1B	Ku_c42700_2798	32.777					Goel et al. 2019	4B	barc109	34.9					Cabral et al. 2018	Excalibur_c102582_360	1A	42.8108	Li et al. 2018	2A	IWB938	51.1	Su et al. 2018	1A	IAAV2342	60.434									Yu et al. 2016	7A
												Hu et al. 2019	1B	Kukri_c37856_123	32.808					Goel et al. 2019	4B	wmc125	45.5					Cabral et al. 2018	Excalibur_c14943_695	1A	42.8108	Li et al. 2018	2A	IWB21686	54.7	Su et al. 2018	1A	IAAV3998	60.434									Yu et al. 2016	7A
												Hu et al. 2019	1B	BS00052089_51	33.22					Goel et al. 2019	4B	wmc47	63.6					Cabral et al. 2018	Excalibur_c17872_137	1A	42.8108	Li et al. 2018	2A	IWB41214	58.9	Su et al. 2018	1A	IAAV5581	60.434									Yu et al. 2016	7A
												Hu et al. 2019	1B	Kukri_c13968_1342	33.309					Goel et al. 2019	4B	wmc413	81.8					Cabral et al. 2018	Excalibur_c24041_794	1A	42.8108	Li et al. 2018	2A	IWB54168	59.8	Su et al. 2018	1A	IAAV7414	60.434									Yu et al. 2016	7A
												Hu et al. 2019	1B	Kukri_c75399_226	33.378					Goel et al. 2019	4B	wmc652	96.6					Cabral et al. 2018	Excalibur_c33881_618	1A	42.8108	Li et al. 2018	2A	IWB42913	60.5	Su et al. 2018	1A	Ku_c2449_578	60.434									Yu et al. 2016	7A
												Hu et al. 2019	1B	BS00022581_51	33.418					Goel et al. 2019	4B	gwm513	100.2					Cabral et al. 2018	Excalibur_c49588_76	1A	42.8108	Li et al. 2018	2A	IWB7315	60.8	Su et al. 2018	1A	Ku_c2898_1247	60.434									Yu et al. 2016	7A
												Hu et al. 2019	1B	tplb0023b14_704	33.729					Goel et al. 2019	4B	gwm149	111.6					Cabral et al. 2018	Excalibur_c59486_172	1A	42.8108	Li et al. 2018	2A	IWB6549	63	Su et al. 2018	1A	Ku_c2898_1284	60.434									Yu et al. 2016	7A
												Hu et al. 2019	1B	BS00073132_51	33.738					Goel et al. 2019	4B	wmc657	123.1					Cabral et al. 2018	Excalibur_rep_c107489_168	1A	42.8108	Li et al. 2018	2A	IWB11887	64.8	Su et al. 2018	1A	Ku_c2898_221	60.434									Yu et al. 2016	7A
												Hu et al. 2019	1B	wsnp_Ku_c4951_8856170	33.745					Goel et al. 2019	4B	gwm495	138.1					Cabral et al. 2018	Excalibur_rep_c111311_58	1A	42.8108	Li et al. 2018	2A	IWB19125	67.5	Su et al. 2018	1A	Kukri_c24402_564	60.434									Yu et al. 2016	7A
												Hu et al. 2019	1B	Tdurum_contig70304_781	33.788					Goel et al. 2019	4B	gpw4079	155.8					Cabral et al. 2018	Excalibur_rep_c86757_244	1A	42.8108	Li et al. 2018	2A	IWB11302	70.5	Su et al. 2018	1A	Kukri_c26669_515	60.434									Yu et al. 2016	7A
												Hu et al. 2019	1B	BS00078228_51	33.926					Goel et al. 2019	4B	gpw4082	168.2					Cabral et al. 2018	GENE-0071_115	1A	42.8108	Li et al. 2018	2A	IWB1036	73.1	Su et al. 2018	1A	Kukri_c46608_277	60.434									Yu et al. 2016	7A
												Hu et al. 2019	1B	IACX626	34.131					Goel et al. 2019	4B	barc1176	177.6					Cabral et al. 2018	GENE-1214_288	1A	42.8108	Li et al. 2018	2A	IW A2640	76.2	Su et al. 2018	1A	RAC875_c2021_1417	60.434									Yu et al. 2016	7A
												Hu et al. 2019	1B	IACX1776	34.283					Goel et al. 2019	4D	barc1118	0					Cabral et al. 2018	IAAV5730	1A	42.8108	Li et al. 2018	2A	IWA970	79.4	Su et al. 2018	1A	RAC875_c2202_1097	60.434									Yu et al. 2016	7A
												Hu et al. 2019	1B	GENE-0505_443	34.427					Goel et al. 2019	4D	wmc285	19.8					Cabral et al. 2018	IACX2325	1A	42.8108	Li et al. 2018	2A	IWB70002	82.1	Su et al. 2018	1A	RAC875_c2313_410	60.434									Yu et al. 2016	7A
												Hu et al. 2019	1B	Ku_c20478_390	34.614					Goel et al. 2019	4D	barc98	31.9					Cabral et al. 2018	Ku_c6979_182	1A	42.8108	Li et al. 2018	2A	IWA3629	86.1	Su et al. 2018	1A	RAC875_c25442_231	60.434									Yu et al. 2016	7A
												Hu et al. 2019	1B	Kukri_rep_c108436_534	34.632					Goel et al. 2019	4D	cfd71	38					Cabral et al. 2018	Kukri_c42043_311	1A	42.8108	Li et al. 2018	2A	IWB42382	92	Su et al. 2018	1A	RAC875_c7305_75	60.434									Yu et al. 2016	7A
												Hu et al. 2019	1B	BobWhite_c17257_454	34.909					Goel et al. 2019	4D	cfd23	58.9					Cabral et al. 2018	Kukri_c43730_841	1A	42.8108	Li et al. 2018	2A	IWB12391	101.2	Su et al. 2018	1A	RAC875_c7891_426	60.434									Yu et al. 2016	7A
												Hu et al. 2019	1B	wsnp_Ex_c6022_10552811	35.055					Goel et al. 2019	4D	wmc89	84					Cabral et al. 2018	Kukri_c47825_138	1A	42.8108	Li et al. 2018	2A	IWB64480	104.1	Su et al. 2018	1A	tplb0032d09_1393	60.434									Yu et al. 2016	7A
												Hu et al. 2019	1B	BS00083072_51	35.1					Goel et al. 2019	4D	sts76	102.5					Cabral et al. 2018	Kukri_rep_c101316_375	1A	42.8108	Li et al. 2018	2A	IWB7471	110.1	Su et al. 2018	1A	wsnp_BF478737A_Ta_2_1	60.434									Yu et al. 2016	7A
												Hu et al. 2019	1B	BS00022920_51	35.419					Goel et al. 2019	4D	cfd84	103					Cabral et al. 2018	Kukri_rep_c103147_745	1A	42.8108	Li et al. 2018	2A	IWB45239	116.5	Su et al. 2018	1A	wsnp_CAP11_c3968_1874257	60.434									Yu et al. 2016	7A
												Hu et al. 2019	1B	Tdurum_contig29676_141	35.751					Goel et al. 2019	4D	pSp3103	120.1					Cabral et al. 2018	RAC875_c15998_53	1A	42.8108	Li et al. 2018	2A	IWB5416	122.2	Su et al. 2018	1A	wsnp_CAP12_c2645_1267978	60.434									Yu et al. 2016	7A
												Hu et al. 2019	1B	Tdurum_contig20299_368	36.164					Goel et al. 2019	4D	psp3112	122.1					Cabral et al. 2018	RAC875_c33300_141	1A	42.8108	Li et al. 2018	2A	IWB4864	125.8	Su et al. 2018	1A	wsnp_Ex_c11697_18821490	60.434
												Hu et al. 2019	1B	BobWhite_c48550_198	40.274					Goel et al. 2019	4D	gpw2180	123.6					Cabral et al. 2018	RAC875_c38417_246	1A	42.8108	Li et al. 2018	2A	IWB7101	129	Su et al. 2018	1A	wsnp_Ex_c13724_21535046	60.434
												Hu et al. 2019	1B	Ku_c71568_374	41.026					Goel et al. 2019	4D	barc1148	126.2					Cabral et al. 2018	RAC875_c39125_365	1A	42.8108	Li et al. 2018	2A	IWB35005	134.2	Su et al. 2018	1A	wsnp_Ex_c13783_21613564	60.434
												Hu et al. 2019	1B	BS00069045_51	41.567					Goel et al. 2019	5D	barc130	0					Cabral et al. 2018	RAC875_c68797_400	1A	42.8108	Li et al. 2018	2A	IWB44277	143.3	Su et al. 2018	1A	wsnp_Ex_c14733_22819350	60.434
												Hu et al. 2019	1B	wsnp_Ex_c5098_9047611	41.746					Goel et al. 2019	5D	gwm190	9.4					Cabral et al. 2018	RAC875_c8515_653	1A	42.8108	Li et al. 2018	2A	IWB64953	147.2	Su et al. 2018	1A	wsnp_Ex_c15722_24074399	60.434
												Hu et al. 2019	1B	BS00063092_51	42.173					Goel et al. 2019	5D	cfd78	19.3					Cabral et al. 2018	RFL_Contig5001_1099	1A	42.8108	Li et al. 2018	2A	IWB7757	153	Su et al. 2018	1A	wsnp_Ex_c17684_26426672	60.434
												Hu et al. 2019	1B	BS00048610_51	42.252					Goel et al. 2019	5D	cfd67	24.7					Cabral et al. 2018	RFL_Contig921_337	1A	42.8108	Li et al. 2018	2B	IWB32004	0	Su et al. 2018	1A	wsnp_Ex_c19730_28728245	60.434
												Hu et al. 2019	1B	BS00076405_51	42.478					Goel et al. 2019	5D	cfd266	29.1					Cabral et al. 2018	TA013367-0455	1A	42.8108	Li et al. 2018	2B	IWB66350	10	Su et al. 2018	1A	wsnp_Ex_c2389_4477096	60.434
												Hu et al. 2019	1B	Excalibur_c60931_1260	42.671					Goel et al. 2019	5D	cfd8	37.4					Cabral et al. 2018	wsnp_Ex_c12352_19708127	1A	42.8108	Li et al. 2018	2B	IWB41241	22	Su et al. 2018	1A	wsnp_Ex_c2389_4477621	60.434
												Hu et al. 2019	1B	wsnp_Ex_c58292_59652859	43.015					Goel et al. 2019	5D	cfd3	42.8					Cabral et al. 2018	wsnp_Ex_c13564_21327699	1A	42.8108	Li et al. 2018	2B	IWB47291	27	Su et al. 2018	1A	wsnp_Ex_c2389_4478587	60.434
												Hu et al. 2019	1B	wsnp_Ku_c8235_14030979	43.14					Goel et al. 2019	5D	cfd57	45.7					Cabral et al. 2018	wsnp_Ex_c1374_2630879	1A	42.8108	Li et al. 2018	2B	IWB11378	30	Su et al. 2018	1A	wsnp_Ex_c2389_4479352	60.434
												Hu et al. 2019	1B	tplb0048b10_1365	43.609					Goel et al. 2019	5D	cfd26	47.6					Cabral et al. 2018	wsnp_Ex_c15383_23645972	1A	42.8108	Li et al. 2018	2B	IWB57596	37	Su et al. 2018	1A	wsnp_Ex_c25220_34487119	60.434
												Hu et al. 2019	1B	Ku_c28580_432	45.681					Goel et al. 2019	5D	cfd10	61.3					Cabral et al. 2018	wsnp_Ex_c21592_30743513	1A	42.8108	Li et al. 2018	2B	IWB34480	33.1	Su et al. 2018	1A	wsnp_Ex_c26800_36025663	60.434
												Hu et al. 2019	1B	wsnp_BG606986B_Ta_2_1	46.879					Goel et al. 2019	5D	gwm174	77.4					Cabral et al. 2018	wsnp_Ex_c21592_30743815	1A	42.8108	Li et al. 2018	2B	IWB24807	42	Su et al. 2018	1A	wsnp_Ex_c28165_37310070	60.434
												Hu et al. 2019	1B	Tdurum_contig10362_555	47.239					Goel et al. 2019	5D	gwm292	103.4					Cabral et al. 2018	wsnp_Ex_c2840_5247386	1A	42.8108	Li et al. 2018	2B	IWB51187	43.1	Su et al. 2018	1A	wsnp_Ex_c3142_5808220	60.434
												Hu et al. 2019	1B	BS00022851_51	47.559					Goel et al. 2019	5D	barc1117	116.7					Cabral et al. 2018	wsnp_Ex_c33831_42253707	1A	42.8108	Li et al. 2018	2B	IWB26233	48	Su et al. 2018	1A	wsnp_Ex_c3142_5808330	60.434
												Hu et al. 2019	1B	IACX906	47.619					Goel et al. 2019	5D	gpw2090	131.2					Cabral et al. 2018	wsnp_Ex_c34260_42602746	1A	42.8108	Li et al. 2018	2B	IWB6007	52	Su et al. 2018	1A	wsnp_Ex_c3365_6183009	60.434
												Hu et al. 2019	1B	IAAV8459	48.238					Goel et al. 2019	5D	cfd29	147.9					Cabral et al. 2018	wsnp_Ex_c3572_6531810	1A	42.8108	Li et al. 2018	2B	IWB46375	58.4	Su et al. 2018	1A	wsnp_Ex_c39661_46902650	60.434
												Hu et al. 2019	1B	Ku_c79340_308	48.446					Goel et al. 2019	5D	barc93	154.8					Cabral et al. 2018	wsnp_Ex_c3572_6533892	1A	42.8108	Li et al. 2018	2B	IWB1586	62	Su et al. 2018	1A	wsnp_Ex_c41237_48104282	60.434
												Hu et al. 2019	1B	BS00095088_51	48.46					Goel et al. 2019	5D	barc347	190.7					Cabral et al. 2018	wsnp_Ex_c3906_7086162	1A	42.8108	Li et al. 2018	2B	IWB49740	67	Su et al. 2018	1A	wsnp_Ex_c43586_49862663	60.434
												Hu et al. 2019	1B	wsnp_Ex_c18384_27213023	48.461					Goel et al. 2019	6A	cnl153	0					Cabral et al. 2018	wsnp_Ex_c3906_7086294	1A	42.8108	Li et al. 2018	2B	IWA2572	66.8	Su et al. 2018	1A	wsnp_Ex_c44498_50537128	60.434
												Hu et al. 2019	1B	RFL_Contig5937_1699	48.758					Goel et al. 2019	6A	barc48	4.4					Cabral et al. 2018	wsnp_Ex_c41969_48673442	1A	42.8108	Li et al. 2018	2B	IWB11952	69	Su et al. 2018	1A	wsnp_Ex_c48375_53299028	60.434
												Hu et al. 2019	1B	RAC875_c1785_366	49.038					Goel et al. 2019	6A	barc3	17.1					Cabral et al. 2018	wsnp_Ex_c43454_49770425	1A	42.8108	Li et al. 2018	2B	IWB3606	69.7	Su et al. 2018	1A	wsnp_Ex_c6075_10637792	60.434
												Hu et al. 2019	1B	BS00082071_51	50.137					Goel et al. 2019	6A	wmc417	29.4					Cabral et al. 2018	wsnp_Ex_c7271_12483592	1A	42.8108	Li et al. 2018	2B	IWB7072	77	Su et al. 2018	1A	wsnp_Ex_c6278_10941843	60.434
												Hu et al. 2019	1B	Kukri_c14733_486	50.67					Goel et al. 2019	6A	wmc580	43					Cabral et al. 2018	wsnp_Ex_c9979_16421462	1A	42.8108	Li et al. 2018	2B	IWB54831	85	Su et al. 2018	1A	wsnp_Ex_c645_1273901	60.434
												Hu et al. 2019	1B	wsnp_Ex_c3147_5817088	50.826					Goel et al. 2019	6A	barc204	53					Cabral et al. 2018	wsnp_Ex_rep_c101746_87053634	1A	42.8108	Li et al. 2018	2B	IWB42992	93.2	Su et al. 2018	1A	wsnp_Ex_c8162_13799067	60.434
												Hu et al. 2019	1B	wsnp_Ex_c1440_2764269	51.606					Goel et al. 2019	6A	cwem49f	73					Cabral et al. 2018	wsnp_JD_c40990_29127031	1A	42.8108	Li et al. 2018	2B	IWB11014	102.1	Su et al. 2018	1A	wsnp_Ex_c8374_14111734	60.434
												Hu et al. 2019	1B	BS00072289_51	52.031					Goel et al. 2019	6A	Xcn138	91.9					Cabral et al. 2018	wsnp_Ku_c18611_27943266	1A	42.8108	Li et al. 2018	2B	IWB8214	112.3	Su et al. 2018	1A	wsnp_Ex_c8666_14522816	60.434
												Hu et al. 2019	1B	wsnp_Ex_c21559_30710510	52.97					Goel et al. 2019	6A	gpw2216	123.4					Cabral et al. 2018	wsnp_Ku_c3844_7053669	1A	42.8108	Li et al. 2018	2B	IWB48	116	Su et al. 2018	1A	wsnp_Ex_rep_c105244_89727546	60.434
												Hu et al. 2019	1B	Kukri_c44191_452	66.077					Goel et al. 2019	7A	barc70	0					Cabral et al. 2018	wsnp_Ra_c18045_27024765	1A	42.8108	Li et al. 2018	2B	IWB23131	121.9	Su et al. 2018	1A	wsnp_Ex_rep_c105244_89727666	60.434
												Hu et al. 2019	1B	Tdurum_contig53772_362	67.323					Goel et al. 2019	7A	barc127	12.2					Cabral et al. 2018	wsnp_Ra_c6182_10833256	1A	42.8108	Li et al. 2018	2B	IWB55932	122.8	Su et al. 2018	1A	wsnp_Ex_rep_c105244_89727820	60.434
												Hu et al. 2019	1B	RAC875_c66649_186	67.442					Goel et al. 2019	7A	barc130	38.6					Cabral et al. 2018	wsnp_Ex_c1374_2630830	1A	42.8108	Li et al. 2018	2B	IWB43105	126.6	Su et al. 2018	1A	wsnp_Ex_rep_c66382_64577768	60.434
												Hu et al. 2019	1B	wsnp_Ex_rep_c78209_74462664	68.592					Goel et al. 2019	7A	gwm130	59.6					Cabral et al. 2018	Excalibur_rep_c68424_255	1A	42.8108	Li et al. 2018	2B	IWB874	138.1	Su et al. 2018	1A	wsnp_Ex_rep_c66875_65276404	60.434
												Hu et al. 2019	1B	Jagger_c7235_96	70.093					Goel et al. 2019	7A	gwm60	79					Cabral et al. 2018	IAAV8147	1A	42.8108	Li et al. 2018	2B	IWB9462	153.2	Su et al. 2018	1A	wsnp_Ku_rep_c104517_90964418	60.434
												Hu et al. 2019	1B	Jagger_c4380_159	72.088					Goel et al. 2019	7A	barc49	93					Cabral et al. 2018	Ra_c11023_679	1A	42.8108	Li et al. 2018	2B	IWB32418	153.9	Su et al. 2018	1A	wsnp_Ku_rep_c68419_67400635	60.434
												Hu et al. 2019	1B	Tdurum_contig93532_89	72.297					Goel et al. 2019	7A	wmc525	107.5					Cabral et al. 2018	RAC875_c18539_1159	1A	42.8108	Li et al. 2018	2B	IWB102	160.9	Su et al. 2018	1A	wsnp_Ra_c26956_36503468	60.434
												Hu et al. 2019	1B	wsnp_Ex_rep_c67747_66422973	74.492					Goel et al. 2019	7A	gpw1100	125.3					Cabral et al. 2018	Tdurum_contig41931_480	1A	42.8108	Li et al. 2018	2B	IWB14683	166.8	Su et al. 2018	1A	RAC875_c9965_354	60.463
												Hu et al. 2019	1B	IAAV5863	75.829					Goel et al. 2019	7A	cwem53b	142.8					Cabral et al. 2018	wsnp_BF482891A_Ta_2_2	1A	42.8108	Li et al. 2018	2B	IWB2228	170.1	Su et al. 2018	1A	Excalibur_c6141_1337	60.463
												Hu et al. 2019	1B	wsnp_Ku_c51703_56915288	77.481					Goel et al. 2019	7A	psp3001	157.8					Cabral et al. 2018	wsnp_JD_c24506_20670773	1A	42.8108	Li et al. 2018	2B	IWB4602	172.3	Su et al. 2018	1A	GENE-0379_108	60.463
												Hu et al. 2019	1B	BS00069044_51	79.584					Goel et al. 2019	7A	barc29	178.1					Cabral et al. 2018	wsnp_JD_c28928_23159662	1A	42.8108	Li et al. 2018	2B	IWB36836	175.8	Su et al. 2018	1A	GENE-0561_101	60.463
												Hu et al. 2019	1B	BS00028476_51	80.75					Goel et al. 2019	7A	gpw4100	199.8					Cabral et al. 2018	wsnp_Ku_c37925_46678703	1A	43.3573	Li et al. 2018	2B	IWB7034	177.5	Su et al. 2018	1A	IAAV5756	60.463
												Hu et al. 2019	1B	BS00023173_51	81.403					Goel et al. 2019	7A	cfa2240	230.1					Cabral et al. 2018	D_contig35755_111	1A	43.3573	Li et al. 2018	2B	IWB53687	188.2	Su et al. 2018	1A	RAC875_c18355_804	60.463
												Hu et al. 2019	1B	tplb0034p10_1134	81.99					Goel et al. 2019	7B	gwm297	0					Cabral et al. 2018	Kukri_c61766_907	1A	43.3573	Li et al. 2018	2B	IWB1593	191.2	Su et al. 2018	1A	wsnp_Ex_c26098_35349418	60.463
												Hu et al. 2019	1B	BS00109244_51	84.651					Goel et al. 2019	7B	gwm302	32.6					Cabral et al. 2018	Kukri_rep_c115954_137	1A	43.3573	Li et al. 2018	2B	IWB41405	195.1	Su et al. 2018	1A	wsnp_Ex_c3142_5808713	60.463
												Hu et al. 2019	1B	RFL_Contig1823_1044	85.082					Goel et al. 2019	7B	barc182	49.5					Cabral et al. 2018	RAC875_c10400_791	1A	43.3573	Li et al. 2018	2B	IWB8386	199.2	Su et al. 2018	1A	wsnp_Ex_rep_c69775_68731015	60.463
												Hu et al. 2019	1B	Kukri_c5407_192	86.361					Goel et al. 2019	7B	barc72	82.4					Cabral et al. 2018	wsnp_Ex_c35563_43690084	1A	43.3573	Li et al. 2018	2B	IWB7626	203.1	Su et al. 2018	1A	wsnp_Ra_c20163_29413615	60.463
												Hu et al. 2019	1B	Excalibur_c21898_1423	0					Goel et al. 2019	7B	barc207	119.1					Cabral et al. 2018	wsnp_Ex_c3565_6520901	1A	43.3573	Li et al. 2018	2B	IWB64655	208.3	Su et al. 2018	1A	Excalibur_c8495_140	60.548
												Hu et al. 2019	1B	Kukri_c8390_1102	0.988					Goel et al. 2019	7B	barc267	137.1					Cabral et al. 2018	wsnp_Ex_rep_c101414_86781128	1A	43.3573	Li et al. 2018	2B	IWB10162	212.7	Su et al. 2018	1A	BS00021730_51	60.548
												Hu et al. 2019	1B	BS00080212_51	2.496					Goel et al. 2019	7B	wmc517	164.8					Cabral et al. 2018	wsnp_Ex_rep_c66562_64849366	1A	43.3573	Li et al. 2018	2B	IWB1769	213.1	Su et al. 2018	1A	BS00022217_51	60.548
												Hu et al. 2019	1B	wsnp_BE405749B_Ta_2_1	2.941					Goel et al. 2019	7B	gwm577	201					Cabral et al. 2018	BS00002000	1A	43.3573	Li et al. 2018	2B	IWB59518	217.6	Su et al. 2018	1A	BS00048887_51	60.548
												Hu et al. 2019	1B	BS00023004_51	3.194					Goel et al. 2019	7B	wmc581	210					Cabral et al. 2018	BobWhite_c12841_56	1A	43.3573	Li et al. 2018	2B	IWB63210	220.2	Su et al. 2018	1A	BS00069117_51	60.548
												Hu et al. 2019	1B	Kukri_c36151_170	3.55					Goel et al. 2019	7B	cfa2040	227.7					Cabral et al. 2018	BS00021878_51	1A	43.3573	Li et al. 2018	2B	IWB74748	226.8	Su et al. 2018	1A	BS00090408_51	60.548
												Hu et al. 2019	1B	BS00022429_51	3.88					Goel et al. 2019	7B	caps149	246					Cabral et al. 2018	BS00041358_51	1A	43.3573	Li et al. 2018	2B	IWB41462	288.3	Su et al. 2018	1A	BS00090634_51	60.548
												Hu et al. 2019	1B	BS00065487_51	4.044					Goel et al. 2019	7B	snp142	279.9					Cabral et al. 2018	BS00065146_51	1A	43.3573	Li et al. 2018	2D	IWB46392	0	Su et al. 2018	1A	Excalibur_rep_c88290_94	60.548
												Hu et al. 2019	1B	Ku_c17846_363	4.295					Goel et al. 2019	7B	barc176	300.7					Cabral et al. 2018	BS00068358_51	1A	43.3573	Li et al. 2018	2D	IWA6768	4.5	Su et al. 2018	1A	GENE-1214_288	60.548
												Hu et al. 2019	1B	wsnp_Ex_c50340_54659660	5.098													Cabral et al. 2018	BS00081455_51	1A	43.3573	Li et al. 2018	2D	IWB19149	7.8	Su et al. 2018	1A	IAAV5391	60.548
												Hu et al. 2019	1B	BS00072113_51	5.284													Cabral et al. 2018	BS00094681_51	1A	43.3573	Li et al. 2018	2D	IWB75156	9.6	Su et al. 2018	1A	IACX9019	60.548
												Hu et al. 2019	1B	Tdurum_contig76266_134	5.497													Cabral et al. 2018	BS00110415_51	1A	43.3573	Li et al. 2018	2D	IWB15580	9.7	Su et al. 2018	1A	Kukri_c6106_470	60.548
												Hu et al. 2019	1B	BS00108058_51	5.863													Cabral et al. 2018	Ex_c6765_2118	1A	43.3573	Li et al. 2018	2D	IWB60348	9.9	Su et al. 2018	1A	Kukri_c6622_763	60.548
												Hu et al. 2019	1B	Tdurum_contig78972_316	7.497													Cabral et al. 2018	Excalibur_c3565_2673	1A	43.3573	Li et al. 2018	2D	IWB9642	11.2	Su et al. 2018	1A	RAC875_c53748_52	60.548
												Hu et al. 2019	1B	CAP7_c3847_204	7.635													Cabral et al. 2018	Excalibur_c44697_74	1A	43.3573	Li et al. 2018	2D	IWB16988	16.7	Su et al. 2018	1A	RAC875_rep_c85118_294	60.548
												Hu et al. 2019	1B	BS00076889_51	8.714													Cabral et al. 2018	Excalibur_rep_c107144_405	1A	43.3573	Li et al. 2018	2D	IWB10588	18.1	Su et al. 2018	1A	TA003382-0407	60.548
												Hu et al. 2019	1B	wsnp_Ex_c5780_10153638	10.541													Cabral et al. 2018	Excalibur_rep_c113303_500	1A	43.3573	Li et al. 2018	2D	IWB7882	20.8	Su et al. 2018	1A	wsnp_Ex_c9979_16421462	60.548
												Hu et al. 2019	1B	Tdurum_contig100292_228	11.08													Cabral et al. 2018	GENE-0053_224	1A	43.3573	Li et al. 2018	2D	IWB6108	22.2	Su et al. 2018	1A	GENE-0041_182	60.656
												Hu et al. 2019	1B	BS00067003_51	13.429													Cabral et al. 2018	GENE-0235_245	1A	43.3573	Li et al. 2018	2D	IWB36380	24.4	Su et al. 2018	1A	IAAV3552	61.022
												Hu et al. 2019	1B	BS00106306_51	13.681													Cabral et al. 2018	GENE-0446_243	1A	43.3573	Li et al. 2018	2D	IWB9163	25.9	Su et al. 2018	1A	BS00031200_51	61.022
												Hu et al. 2019	1B	BS00022590_51	14.132													Cabral et al. 2018	IAAV749	1A	43.3573	Li et al. 2018	2D	IWB8161	27.2	Su et al. 2018	1A	BS00085851_51	61.022
												Hu et al. 2019	1B	BS00067567_51	15.976													Cabral et al. 2018	IAAV7551	1A	43.3573	Li et al. 2018	2D	IWB8439	30.1	Su et al. 2018	1A	BS00101116_51	61.022
												Hu et al. 2019	1B	Tdurum_contig9762_314	16.526													Cabral et al. 2018	IAAV7929	1A	43.3573	Li et al. 2018	2D	IWB43309	32.1	Su et al. 2018	1A	CAP7_c3885_73	61.022
												Hu et al. 2019	1B	BS00110546_51	23.191													Cabral et al. 2018	IACX293	1A	43.3573	Li et al. 2018	2D	IWB70673	34.3	Su et al. 2018	1A	IAAV4916	61.022
												Hu et al. 2019	1B	Tdurum_contig92835_177	44.679													Cabral et al. 2018	IACX4168	1A	43.3573	Li et al. 2018	2D	IWB32187	36.2	Su et al. 2018	1A	Kukri_c28532_103	61.022
												Hu et al. 2019	1B	Tdurum_contig1631_240	47.479													Cabral et al. 2018	Kukri_c12165_1148	1A	43.3573	Li et al. 2018	2D	IWB6737	38.7	Su et al. 2018	1A	Ra_c2322_174	61.022
												Hu et al. 2019	1B	RAC875_c26801_179	49.666													Cabral et al. 2018	Kukri_c19389_97	1A	43.3573	Li et al. 2018	2D	IWB28572	40.2	Su et al. 2018	1A	Ra_c26970_1740	61.022
												Hu et al. 2019	1B	wsnp_Ex_c649_1279852	52.764													Cabral et al. 2018	Kukri_c29668_338	1A	43.3573	Li et al. 2018	2D	IWB41295	43.5	Su et al. 2018	1A	RAC875_c41581_176	61.022
												Hu et al. 2019	1B	BS00063537_51	53.846													Cabral et al. 2018	Kukri_c54467_100	1A	43.3573	Li et al. 2018	2D	IWB58134	45	Su et al. 2018	1A	RAC875_c49760_107	61.022
												Hu et al. 2019	1B	wsnp_Ex_c29452_38489374	54.478													Cabral et al. 2018	Kukri_c67601_267	1A	43.3573	Li et al. 2018	2D	IWB6349	48.3	Su et al. 2018	1A	wsnp_BE585780A_Ta_2_1	61.022
												Hu et al. 2019	1B	Ex_c29452_302	54.763													Cabral et al. 2018	Kukri_rep_c106037_96	1A	43.3573	Li et al. 2018	2D	IWB44228	51.1	Su et al. 2018	1A	wsnp_Ex_c2178_4086161	61.022
												Hu et al. 2019	1B	BobWhite_c20073_382	55.542													Cabral et al. 2018	RAC875_c105730_397	1A	43.3573	Li et al. 2018	2D	IWB53594	54.2	Su et al. 2018	1A	wsnp_Ku_rep_c71909_71634013	61.022
												Hu et al. 2019	1B	BS00063302_51	55.955													Cabral et al. 2018	RAC875_c12808_182	1A	43.3573	Li et al. 2018	2D	IWB1093	57	Su et al. 2018	1A	BS00062715_51	61.129
												Hu et al. 2019	1B	BS00066305_51	56.2													Cabral et al. 2018	RAC875_c24560_604	1A	43.3573	Li et al. 2018	2D	IWB42424	60.5	Su et al. 2018	1A	RAC875_c9833_297	61.275
												Hu et al. 2019	1B	BS00022784_51	56.246													Cabral et al. 2018	RAC875_c25799_457	1A	43.3573	Li et al. 2018	2D	IWB2843	63	Su et al. 2018	1A	BS00041358_51	61.339
												Hu et al. 2019	1B	Tdurum_contig76653_295	56.979													Cabral et al. 2018	RAC875_c31168_238	1A	43.3573	Li et al. 2018	2D	IWB14402	68	Su et al. 2018	1A	BS00081455_51	61.339
												Hu et al. 2019	1B	Tdurum_contig8669_131	57.405													Cabral et al. 2018	RAC875_c3751_96	1A	43.3573	Li et al. 2018	2D	IWB47227	70	Su et al. 2018	1A	BS00110415_51	61.339
												Hu et al. 2019	1B	Tdurum_contig42558_134	58.724													Cabral et al. 2018	TA001772-0625	1A	43.3573	Li et al. 2018	2D	IWB32483	69.6	Su et al. 2018	1A	IAAV7929	61.339
												Hu et al. 2019	1B	Excalibur_c11190_617	59.488													Cabral et al. 2018	TA016013-1040	1A	43.3573	Li et al. 2018	2D	IWB62656	72.5	Su et al. 2018	1A	Kukri_c67601_267	61.339
												Hu et al. 2019	1B	BS00036439_51	62.206													Cabral et al. 2018	Tdurum_contig48416_335	1A	43.3573	Li et al. 2018	2D	IWB15727	74	Su et al. 2018	1A	RAC875_c25799_457	61.339
												Hu et al. 2019	1B	BS00023105_51	62.597													Cabral et al. 2018	Tdurum_contig55009_1153	1A	43.3573	Li et al. 2018	2D	IWB73784	76	Su et al. 2018	1A	TA001772-0625	61.339
												Hu et al. 2019	1B	Tdurum_contig93330_263	62.887													Cabral et al. 2018	wsnp_BE403956A_Ta_2_3	1A	43.3573	Li et al. 2018	2D	IWB38832	79.7	Su et al. 2018	1A	wsnp_Ex_c25628_34888253	61.339
												Hu et al. 2019	1B	BS00022398_51	63.002													Cabral et al. 2018	wsnp_BF475149A_Ta_2_1	1A	43.3573	Li et al. 2018	2D	IWB56672	82	Su et al. 2018	1A	wsnp_Ex_c25628_34888439	61.339
												Hu et al. 2019	1B	Tdurum_contig4904_2923	72.516													Cabral et al. 2018	wsnp_Ex_c10100_16600633	1A	43.3573	Li et al. 2018	2D	IWB63568	85.4	Su et al. 2018	1A	wsnp_Ex_c35563_43690084	61.339
												Hu et al. 2019	1B	Kukri_c11000_1769	73.658													Cabral et al. 2018	wsnp_Ex_c18169_26977013	1A	43.3573	Li et al. 2018	2D	IWB23642	88	Su et al. 2018	1A	wsnp_Ex_c3986_7217641	61.339
												Hu et al. 2019	1B	Ex_c4436_1947	74.109													Cabral et al. 2018	wsnp_Ex_c25628_34888253	1A	43.3573	Li et al. 2018	2D	IWB6529	91.2	Su et al. 2018	1A	wsnp_Ex_c4605_8240189	61.339
												Hu et al. 2019	1B	wsnp_Ex_c4774_8519623	77.476													Cabral et al. 2018	wsnp_Ex_c25628_34888439	1A	43.3573	Li et al. 2018	2D	IWB35404	96	Su et al. 2018	1A	wsnp_Ex_rep_c103087_88123733	61.339
												Hu et al. 2019	1B	BobWhite_c9091_160	79.334													Cabral et al. 2018	wsnp_Ex_c3565_6521098	1A	43.3573	Li et al. 2018	2D	IWB8759	100.6	Su et al. 2018	1A	wsnp_Ex_rep_c66562_64849366	61.339
												Hu et al. 2019	1B	BS00071893_51	81.107													Cabral et al. 2018	wsnp_Ex_c3986_7217641	1A	43.3573	Li et al. 2018	3A	IWB37072	0	Su et al. 2018	1A	wsnp_Ku_c37925_46678703	61.354
												Hu et al. 2019	1B	BS00078414_51	81.562													Cabral et al. 2018	wsnp_Ex_c4605_8239915	1A	43.3573	Li et al. 2018	3A	IWB41434	8.6	Su et al. 2018	1A	BobWhite_c12841_56	61.354
												Hu et al. 2019	1B	RAC875_c49225_66	81.77													Cabral et al. 2018	wsnp_Ex_c4605_8240189	1A	43.3573	Li et al. 2018	3A	IWB26921	18.2	Su et al. 2018	1A	D_contig35755_111	61.354
												Hu et al. 2019	1B	CAP12_c1085_283	82.762													Cabral et al. 2018	wsnp_Ex_c4605_8241260	1A	43.3573	Li et al. 2018	3A	IWB54698	30	Su et al. 2018	1A	GENE-0446_243	61.354
												Hu et al. 2019	1B	wsnp_BE591290B_Ta_2_7	83.482													Cabral et al. 2018	wsnp_Ex_c5543_9763520	1A	43.3573	Li et al. 2018	3A	IWB23480	39.2	Su et al. 2018	1A	IAAV7551	61.354
												Hu et al. 2019	1B	BS00022678_51	93.986													Cabral et al. 2018	wsnp_Ex_c6817_11761300	1A	43.3573	Li et al. 2018	3A	IWB14646	45.8	Su et al. 2018	1A	IACX293	61.354
												Hu et al. 2019	1B	BS00043666_51	94.846													Cabral et al. 2018	wsnp_Ex_rep_c101414_86780996	1A	43.3573	Li et al. 2018	3A	IW A2048	47.3	Su et al. 2018	1A	Kukri_c61766_907	61.354
												Hu et al. 2019	1B	wsnp_RFL_Contig3951_4390396	100.503													Cabral et al. 2018	wsnp_Ex_rep_c103087_88123733	1A	43.3573	Li et al. 2018	3A	IWB73771	49.3	Su et al. 2018	1A	Kukri_rep_c106037_96	61.354
												Hu et al. 2019	1D	Excalibur_rep_c105429_654	0													Cabral et al. 2018	wsnp_Ex_rep_c103087_88124573	1A	43.3573	Li et al. 2018	3A	IWA42896	51.8	Su et al. 2018	1A	RAC875_c24560_604	61.354
												Hu et al. 2019	1D	BobWhite_c1715_887	0.026													Cabral et al. 2018	wsnp_Ex_rep_c69738_68695568	1A	43.3573	Li et al. 2018	3A	IWB1102	54.1	Su et al. 2018	1A	wsnp_Ex_rep_c101414_86781128	61.354
												Hu et al. 2019	1D	BobWhite_c33756_74	6.3													Cabral et al. 2018	wsnp_Ku_c4413_8008008	1A	43.3573	Li et al. 2018	3A	IWB40077	58	Su et al. 2018	1A	Kukri_c88698_296	61.646
												Hu et al. 2019	1D	IACX9354	16.074													Cabral et al. 2018	wsnp_Ku_c47386_53862969	1A	43.3573	Li et al. 2018	3A	IWB64668	60.3	Su et al. 2018	1A	Ku_c8351_2029	61.816
												Hu et al. 2019	1D	RAC875_c2040_564	16.897													Cabral et al. 2018	wsnp_Ra_c4481_8119609	1A	43.3573	Li et al. 2018	3A	IWA1894	63.3	Su et al. 2018	1A	BobWhite_c12568_900	61.816
												Hu et al. 2019	1D	RAC875_c29598_336	17.442													Cabral et al. 2018	Kukri_rep_c69903_1525	1A	43.9037	Li et al. 2018	3A	IWB40718	66.5	Su et al. 2018	1A	BobWhite_c5356_1272	61.816
												Hu et al. 2019	1D	CAP12_c46_333	17.547													Cabral et al. 2018	Excalibur_c16292_1338	1A	43.9037	Li et al. 2018	3A	IWB51117	69.5	Su et al. 2018	1A	BS00032112_51	61.816
												Hu et al. 2019	1D	RAC875_c7752_145	17.788													Cabral et al. 2018	Excalibur_rep_c84731_611	1A	43.9037	Li et al. 2018	3A	IWB27247	71.6	Su et al. 2018	1A	Excalibur_c30591_637	61.816
												Hu et al. 2019	1D	BS00042197_51	21.825													Cabral et al. 2018	GENE-0491_632	1A	43.9037	Li et al. 2018	3A	IWB32630	74	Su et al. 2018	1A	Excalibur_c32167_59	61.816
												Hu et al. 2019	1D	RAC875_c62_1514	37.61													Cabral et al. 2018	Kukri_c8332_120	1A	43.9037	Li et al. 2018	3A	IWB16116	76.6	Su et al. 2018	1A	Excalibur_c49421_443	61.816
												Hu et al. 2019	1D	BS00087783_51	38.308													Cabral et al. 2018	RAC875_c9899_510	1A	43.9037	Li et al. 2018	3A	IWB39224	79	Su et al. 2018	1A	IAAV1225	61.816
												Hu et al. 2019	1D	Kukri_rep_c112609_711	41.033													Cabral et al. 2018	TA004725-0348	1A	43.9037	Li et al. 2018	3A	IWB28341	82.8	Su et al. 2018	1A	IAAV5406	61.816
												Hu et al. 2019	1D	wsnp_Ex_c16720_25268525	44.253													Cabral et al. 2018	Ra_c2895_591	1A	44.9968	Li et al. 2018	3A	IWA3250	85.2	Su et al. 2018	1A	IAAV5535	61.816
												Hu et al. 2019	1D	BS00032149_51	46.907													Cabral et al. 2018	Excalibur_c13489_867	1A	44.9968	Li et al. 2018	3A	IWB70097	88.1	Su et al. 2018	1A	IACX3047	61.816
												Hu et al. 2019	1D	RAC875_rep_c105196_532	55.222													Cabral et al. 2018	IAAV7203	1A	44.9968	Li et al. 2018	3A	IWB72993	90.1	Su et al. 2018	1A	IACX4378	61.816
												Hu et al. 2019	1D	wsnp_Ku_c36191_45258467	68.575													Cabral et al. 2018	Kukri_c20672_360	1A	44.9968	Li et al. 2018	3A	IWB2176	93.6	Su et al. 2018	1A	Ku_c1571_1457	61.816
												Hu et al. 2019	1D	RAC875_c1211_3475	69.264													Cabral et al. 2018	Kukri_c35200_895	1A	44.9968	Li et al. 2018	3A	IWB8499	94.1	Su et al. 2018	1A	Kukri_c27785_400	61.816
												Hu et al. 2019	1D	Excalibur_c23473_451	71.015													Cabral et al. 2018	RFL_Contig2270_2610	1A	44.9968	Li et al. 2018	3A	IWB23609	94.5	Su et al. 2018	1A	RAC875_c23081_141	61.816
												Hu et al. 2019	1D	Excalibur_c8231_398	77.195													Cabral et al. 2018	tplb0041a22_935	1A	44.9968	Li et al. 2018	3A	IWB69690	96.6	Su et al. 2018	1A	RAC875_c53185_802	61.816
												Hu et al. 2019	1D	wsnp_Ex_c35886_43949442	79.637													Cabral et al. 2018	tplb0059e14_515	1A	44.9968	Li et al. 2018	3A	IWA4810	99.2	Su et al. 2018	1A	wsnp_Ex_c12336_19686808	61.816
												Hu et al. 2019	1D	Excalibur_c23906_303	79.676													Cabral et al. 2018	wsnp_Ex_c572_1138339	1A	44.9968	Li et al. 2018	3A	IWB57607	103.4	Su et al. 2018	1A	wsnp_Ex_c16592_25117132	61.816
												Hu et al. 2019	1D	IACX574	80.851													Cabral et al. 2018	wsnp_Ex_c572_1138503	1A	44.9968	Li et al. 2018	3A	[WB66582	104.1	Su et al. 2018	1A	wsnp_Ex_c21336_30465618	61.816
												Hu et al. 2019	1D	RAC875_rep_c112321_108	87.277													Cabral et al. 2018	wsnp_Ex_c572_1138770	1A	44.9968	Li et al. 2018	3A	IWB23959	104.2	Su et al. 2018	1A	wsnp_Ex_c27940_37101775	61.816
												Hu et al. 2019	1D	RAC875_c30203_57	107.505													Cabral et al. 2018	wsnp_Ra_c2895_5488879	1A	44.9968	Li et al. 2018	3A	IWA3111	107	Su et al. 2018	1A	wsnp_Ex_c34344_42676379	61.816
												Hu et al. 2019	2A	Tdurum_contig11802_864	0													Cabral et al. 2018	wsnp_Ku_c4018_7333828	1A	44.9968	Li et al. 2018	3A	IWB30806	110.4	Su et al. 2018	1A	wsnp_Ex_c34344_42677360	61.816
												Hu et al. 2019	2A	IACX10903	0.653													Cabral et al. 2018	wsnp_Ex_c21193_30320134	1A	45.5586	Li et al. 2018	3A	IWB34330	113.3	Su et al. 2018	1A	wsnp_Ex_c42282_48900922	61.816
												Hu et al. 2019	2A	wsnp_Ex_c19516_28483751	2.004													Cabral et al. 2018	BobWhite_c12568_900	1A	45.5586	Li et al. 2018	3A	IWB9293	118.8	Su et al. 2018	1A	wsnp_Ex_c5192_9203100	61.816
												Hu et al. 2019	2A	Kukri_c38985_537	3.921													Cabral et al. 2018	BS00032112_51	1A	45.5586	Li et al. 2018	3A	IWB5927	121.5	Su et al. 2018	1A	wsnp_Ex_c5192_9203682	61.816
												Hu et al. 2019	2A	BS00066756_51	11.571													Cabral et al. 2018	Ex_c105443_895	1A	45.5586	Li et al. 2018	3A	IWB30466	124.3	Su et al. 2018	1A	wsnp_Ex_c8588_14419007	61.816
												Hu et al. 2019	2A	RAC875_rep_c78518_198	12.938													Cabral et al. 2018	Excalibur_c34697_831	1A	45.5586	Li et al. 2018	3A	IWB7482	131.4	Su et al. 2018	1A	wsnp_Ex_rep_c66628_64934660	61.816
												Hu et al. 2019	2A	BS00004724_51	13.544													Cabral et al. 2018	Excalibur_c35821_61	1A	45.5586	Li et al. 2018	3A	IWB5966	134.4	Su et al. 2018	1A	wsnp_Ex_rep_c70358_69302556	61.816
												Hu et al. 2019	2A	Ku_c23118_149	18.319													Cabral et al. 2018	Excalibur_rep_c82767_175	1A	45.5586	Li et al. 2018	3A	IWB71198	137	Su et al. 2018	1A	wsnp_Ku_c21316_31053745	61.816
												Hu et al. 2019	2A	Ra_c58279_702	24.929													Cabral et al. 2018	Ku_c16913_363	1A	45.5586	Li et al. 2018	3A	IWB30429	140.5	Su et al. 2018	1A	wsnp_Ku_c21316_31053776	61.816
												Hu et al. 2019	2A	BS00022332_51	26.42													Cabral et al. 2018	Kukri_c16913_422	1A	45.5586	Li et al. 2018	3A	IWB28840	152.2	Su et al. 2018	1A	wsnp_Ku_c21356_31093507	61.816
												Hu et al. 2019	2A	Tdurum_contig55610_784	27.074													Cabral et al. 2018	Kukri_c25215_124	1A	45.5586	Li et al. 2018	3A	IWB11	161.5	Su et al. 2018	1A	wsnp_Ku_c23926_33870364	61.816
												Hu et al. 2019	2A	Kukri_rep_c72412_856	28.318													Cabral et al. 2018	Ra_c4159_2716	1A	45.5586	Li et al. 2018	3A	IWB29417	167.6	Su et al. 2018	1A	wsnp_Ku_c24239_34199356	61.816
												Hu et al. 2019	2A	Tdurum_contig46797_585	29.084													Cabral et al. 2018	RAC875_c19579_377	1A	45.5586	Li et al. 2018	3A	IWB46617	177.2	Su et al. 2018	1A	wsnp_Ku_c2815_5317230	61.816
												Hu et al. 2019	2A	Tdurum_contig42283_347	30.368													Cabral et al. 2018	RAC875_c23081_141	1A	45.5586	Li et al. 2018	3B	IWB17577	0	Su et al. 2018	1A	wsnp_Ra_c37745_45806931	61.816
												Hu et al. 2019	2A	wsnp_JD_rep_c48914_33168544	30.941													Cabral et al. 2018	wsnp_Ex_c19294_28225846	1A	45.5586	Li et al. 2018	3B	IWB58513	6.1	Su et al. 2018	1A	wsnp_Ra_c7818_13376644	61.816
												Hu et al. 2019	2A	wsnp_Ex_c866_1684236	32.028													Cabral et al. 2018	wsnp_Ex_c21336_30465618	1A	45.5586	Li et al. 2018	3B	IWB277	91	Su et al. 2018	1A	wsnp_Ex_c40942_47886087	62.222
												Hu et al. 2019	2A	RAC875_c10616_199	32.329													Cabral et al. 2018	wsnp_Ex_c35821_43892960	1A	45.5586	Li et al. 2018	3B	IWB23378	15.1	Su et al. 2018	1A	Ex_c14515_218	62.222
												Hu et al. 2019	2A	IAAV7468	33.389													Cabral et al. 2018	wsnp_Ex_rep_c105443_89868548	1A	45.5586	Li et al. 2018	3B	IWB5925	18.3	Su et al. 2018	1A	Excalibur_c27500_469	62.222
												Hu et al. 2019	2A	Tdurum_contig66015_346	36.056													Cabral et al. 2018	wsnp_Ku_c16913_25885872	1A	45.5586	Li et al. 2018	3B	IWB2094	22.1	Su et al. 2018	1A	Excalibur_c6255_1119	62.222
												Hu et al. 2019	2A	RFL_Contig1049_1473	37.313													Cabral et al. 2018	wsnp_Ra_c4664_8410628	1A	45.5586	Li et al. 2018	3B	IWB9212	1.3	Su et al. 2018	1A	GENE-2795_120	62.222
												Hu et al. 2019	2A	BS00022241_51	40.416													Cabral et al. 2018	wPt-9592	1A	45.5586	Li et al. 2018	3B	IWB60454	25.2	Su et al. 2018	1A	IAAV1851	62.222
												Hu et al. 2019	2A	Kukri_c40035_258	43.861													Cabral et al. 2018	wsnp_Ku_c21316_31053776	1A	46.2483	Li et al. 2018	3B	IWB64404	28.1	Su et al. 2018	1A	RAC875_c7847_1352	62.222
												Hu et al. 2019	2A	BobWhite_c14530_51	45.502													Cabral et al. 2018	BS00021864_51	1A	46.2483	Li et al. 2018	3B	IWB41404 -	31.1	Su et al. 2018	1A	RAC875_rep_c70404_755	62.222
												Hu et al. 2019	2A	Excalibur_c12169_1088	45.951													Cabral et al. 2018	Excalibur_c15357_432	1A	46.2483	Li et al. 2018	3B	IWA4340	32.8	Su et al. 2018	1A	RFL_Contig1563_1180	62.222
												Hu et al. 2019	2A	wsnp_CAP11_rep_c8768_3788007	46.165													Cabral et al. 2018	Tdurum_contig32437_257	1A	46.2483	Li et al. 2018	3B	IWB59174	34.2	Su et al. 2018	1A	wsnp_Ex_c17684_26426785	62.222
												Hu et al. 2019	2A	RAC875_rep_c73925_276	46.429													Cabral et al. 2018	wsnp_Ex_rep_c109742_92411838	1A	46.2483	Li et al. 2018	3B	IWA7692	34.5	Su et al. 2018	1A	wsnp_Ex_rep_c68183_66958099	62.222
												Hu et al. 2019	2A	BS00039983_51	47.76													Cabral et al. 2018	wsnp_Ku_c21316_31053745	1A	46.2483	Li et al. 2018	3B	IWB54417	35.2	Su et al. 2018	1A	wsnp_RFL_Contig1736_858448	62.222
												Hu et al. 2019	2A	Kukri_c47534_1509	47.961													Cabral et al. 2018	wsnp_JG_c3720_1558699	1A	50.0809	Li et al. 2018	3B	IWB5772	37.1	Su et al. 2018	1A	GENE-0287_28	62.274
												Hu et al. 2019	2A	Kukri_rep_c83485_398	47.963													Cabral et al. 2018	Excalibur_c5033_587	1A	50.0809	Li et al. 2018	3B	IWA2359	39.1	Su et al. 2018	1A	BS00021895_51	62.274
												Hu et al. 2019	2A	Tdurum_contig9731_121	47.966													Cabral et al. 2018	Kukri_c18017_1696	1A	50.0809	Li et al. 2018	3B	IWB9673	42.1	Su et al. 2018	1A	BS00022216_51	62.274
												Hu et al. 2019	2A	BS00039209_51	47.97													Cabral et al. 2018	RAC875_c18839_403	1A	50.0809	Li et al. 2018	3B	IWB5332	45.4	Su et al. 2018	1A	Excalibur_c57766_92	62.274
												Hu et al. 2019	2A	Tdurum_contig5311_67	47.99													Cabral et al. 2018	Excalibur_c29605_535	1A	50.6274	Li et al. 2018	3B	IWB25051	48.2	Su et al. 2018	1A	IACX9067	62.274
												Hu et al. 2019	2A	BS00036766_51	47.991													Cabral et al. 2018	tplb0031d22_1107	1A	51.1739	Li et al. 2018	3B	IWB54692	50.1	Su et al. 2018	1A	Ex_c5759_663	62.573
												Hu et al. 2019	2A	RAC875_c13116_943	48.001													Cabral et al. 2018	BobWhite_c26212_208	1A	51.1739	Li et al. 2018	3B	IWB46345	52.4	Su et al. 2018	1A	Excalibur_rep_c84731_611	62.851
												Hu et al. 2019	2A	wsnp_BG314532A_Ta_2_1	48.026													Cabral et al. 2018	wsnp_Ku_c5210_9290700	1A	51.7204	Li et al. 2018	3B	IWB5547	572	Su et al. 2018	1A	GENE-0283_330	62.876
												Hu et al. 2019	2A	BobWhite_c17476_149	48.581													Cabral et al. 2018	CAP12_c3602_91	1A	51.7204	Li et al. 2018	3B	IWA4685	63.1	Su et al. 2018	1A	Kukri_c362_151	63.093
												Hu et al. 2019	2A	BS00070693_51	50.605													Cabral et al. 2018	Jagger_c5111_190	1A	51.7204	Li et al. 2018	3B	IWB7619	68.1	Su et al. 2018	1A	BS00066336_51	63.093
												Hu et al. 2019	2A	BS00070692_51	50.913													Cabral et al. 2018	BobWhite_c27438_81	1A	51.7204	Li et al. 2018	3B	IWB11913	74.1	Su et al. 2018	1A	Ex_c5759_628	63.093
												Hu et al. 2019	2A	wsnp_BE403352A_Ta_2_1	51.492													Cabral et al. 2018	BS00011146_51	1A	51.7204	Li et al. 2018	3B	IWB6485	80.1	Su et al. 2018	1A	Excalibur_c20133_87	63.093
												Hu et al. 2019	2A	wsnp_Ku_c15567_24224486	51.775													Cabral et al. 2018	Excalibur_c3145_70	1A	51.7204	Li et al. 2018	3B	IWB46341	86.1	Su et al. 2018	1A	Excalibur_c22728_610	63.093
												Hu et al. 2019	2A	Tdurum_contig47258_1039	51.975													Cabral et al. 2018	Ku_c17322_2436	1A	51.7204	Li et al. 2018	3B	IWB48703	89.7	Su et al. 2018	1A	IACX500	63.093
												Hu et al. 2019	2A	wsnp_Ex_c22645_31845564	52.702													Cabral et al. 2018	RAC875_rep_c120644_74	1A	51.7204	Li et al. 2018	3B	IWB2365	89.9	Su et al. 2018	1A	Kukri_c362_91	63.093
												Hu et al. 2019	2A	IACX549	53.409													Cabral et al. 2018	Tdurum_contig12576_159	1A	51.7204	Li et al. 2018	3B	IWB22603	93	Su et al. 2018	1A	wsnp_Ex_c43454_49770425	63.093
												Hu et al. 2019	2A	RAC875_c4015_2175	53.601													Cabral et al. 2018	IACX7716	1A	52.8134	Li et al. 2018	3B	IWA7344	96.2	Su et al. 2018	1A	wsnp_Ex_c8364_14095508	63.093
												Hu et al. 2019	2A	BS00089497_51	59.288													Cabral et al. 2018	BS00009459	1A	52.8134	Li et al. 2018	3B	IWB6101	99.1	Su et al. 2018	1A	Ex_c28144_1843	63.314
												Hu et al. 2019	2A	RAC875_c16333_340	66.05													Cabral et al. 2018	Kukri_c84024_375	1A	55.0006	Li et al. 2018	3B	IWA4841	102.5	Su et al. 2018	1A	Ex_c8514_1342	63.314
												Hu et al. 2019	2A	Jagger_c4026_255	68.26													Cabral et al. 2018	BS00065750_51	1A	55.0006	Li et al. 2018	3B	IWB47722	105	Su et al. 2018	1A	Ra_c58315_265	63.314
												Hu et al. 2019	2A	BS00039422_51	68.719													Cabral et al. 2018	Excalibur_c39257_634	1A	55.5471	Li et al. 2018	3B	IWA2063	108.1	Su et al. 2018	1A	wsnp_Ex_c25734_34995416	63.314
												Hu et al. 2019	2A	Ku_c33828_1209	68.852													Cabral et al. 2018	RAC875_c102343_204	1A	56.0966	Li et al. 2018	3B	IWB27766	112.9	Su et al. 2018	1A	BS00023126_51	63.431
												Hu et al. 2019	2A	Excalibur_c36481_519	69.08													Cabral et al. 2018	RAC875_c6798_467	1A	58.2958	Li et al. 2018	3B	IWB75061	113.4	Su et al. 2018	1A	IAAV5730	63.603
												Hu et al. 2019	2A	BS00023214_51	69.251													Cabral et al. 2018	BS00109991_51	1A	58.2958	Li et al. 2018	3B	IWB25749	116	Su et al. 2018	1A	CAP8_c806_297	63.779
												Hu et al. 2019	2A	BS00080752_51	69.749													Cabral et al. 2018	Ex_c4060_510	1A	58.2958	Li et al. 2018	3B	1WB30542	119.1	Su et al. 2018	1A	BS00067021_51	64
												Hu et al. 2019	2A	Ra_c26702_797	70.285													Cabral et al. 2018	GENE-0262_431	1A	58.2958	Li et al. 2018	3B	1WB58977	1222	Su et al. 2018	1A	wsnp_Ex_c3963_7179957	64.434
												Hu et al. 2019	2A	Excalibur_c96_619	72.277													Cabral et al. 2018	TA001600-1603	1A	60.483	Li et al. 2018	3B	IWB42901	128.2	Su et al. 2018	1A	BS00011835_51	64.908
												Hu et al. 2019	2A	BS00057059_51	72.574													Cabral et al. 2018	barc1022	1A	60.483	Li et al. 2018	3B	1WB64608	131.2	Su et al. 2018	1A	GENE-0572_334	65.183
												Hu et al. 2019	2A	BobWhite_c16923_64	73.616													Cabral et al. 2018	BobWhite_c721_74	1A	60.483	Li et al. 2018	3B	1WA784	1340	Su et al. 2018	1A	IACX542	65.183
												Hu et al. 2019	2A	RAC875_c104160_61	74.879													Cabral et al. 2018	BS00085366_51	1A	60.483	Li et al. 2018	3B	IWB5924	140.1	Su et al. 2018	1A	BS00064357_51	65.37
												Hu et al. 2019	2A	wsnp_Ex_c59095_60108185	75.175													Cabral et al. 2018	IAAV544	1A	60.483	Li et al. 2018	3B	IWB9656	143.4	Su et al. 2018	1A	wsnp_Ex_c14866_22995097	65.448
												Hu et al. 2019	2A	wsnp_Ex_c3808_6925015	75.741													Cabral et al. 2018	Jagger_c6890_167	1A	60.483	Li et al. 2018	3B	IWB42113	146	Su et al. 2018	1A	IACX3496	65.743
												Hu et al. 2019	2A	tplb0046b02_872	75.784													Cabral et al. 2018	Ku_c8992_405	1A	60.483	Li et al. 2018	3B	IWB39288	146.5	Su et al. 2018	1A	BS00094925_51	66.076
												Hu et al. 2019	2A	Tdurum_contig60205_806	75.873													Cabral et al. 2018	Kukri_rep_c115111_251	1A	60.483	Li et al. 2018	3B	IWB7551	149.7	Su et al. 2018	1A	BS00002216_51	66.076
												Hu et al. 2019	2A	Excalibur_rep_c66618_87	76.017													Cabral et al. 2018	RAC875_c12348_720	1A	60.483	Li et al. 2018	3D	IWB72097	0	Su et al. 2018	1A	BS00087600_51	66.076
												Hu et al. 2019	2A	BS00092550_51	76.533													Cabral et al. 2018	RAC875_rep_c105766_652	1A	60.483	Li et al. 2018	3D	IWB71225	4	Su et al. 2018	1A	IAAV2072	66.076
												Hu et al. 2019	2A	Ku_c29409_324	78.865													Cabral et al. 2018	RAC875_rep_c72890_63	1A	60.483	Li et al. 2018	3D	IWB13387	7.5	Su et al. 2018	1A	IACX4386	66.076
												Hu et al. 2019	2A	BobWhite_c3871_428	79.027													Cabral et al. 2018	Tdurum_contig56158_60	1A	60.483	Li et al. 2018	3D	IWB20573	9.2	Su et al. 2018	1A	Kukri_c60564_136	66.076
												Hu et al. 2019	2A	BS00022587_51	79.243													Cabral et al. 2018	wsnp_Ex_c41953_48657850	1A	60.483	Li et al. 2018	3D	IW B67546	11.4	Su et al. 2018	1A	BS00003758_51	66.5
												Hu et al. 2019	2A	Kukri_c6944_1636	79.473													Cabral et al. 2018	wsnp_Ex_c41953_48658353	1A	60.483	Li et al. 2018	3D	IWB6968	13.5	Su et al. 2018	1A	Ex_c14515_220	66.5
												Hu et al. 2019	2A	BS00022813_51	79.99													Cabral et al. 2018	wsnp_Ex_rep_c102067_87313597	1A	60.483	Li et al. 2018	3D	IWB32610	20.8	Su et al. 2018	1A	wsnp_Ex_rep_c104050_88861052	66.5
												Hu et al. 2019	2A	RAC875_rep_c119619_54	80.874													Cabral et al. 2018	wsnp_Ex_rep_c102067_87314043	1A	60.483	Li et al. 2018	3D	IWB34605	22.4	Su et al. 2018	1A	Xgwm164	66.972
												Hu et al. 2019	2A	Ku_c13700_1196	80.924													Cabral et al. 2018	wsnp_JD_c3973_5044238	1A	60.483	Li et al. 2018	3D	IWB31166	24.1	Su et al. 2018	1A	Xwmc278	67.244
												Hu et al. 2019	2A	BS00107804_51	81.248													Cabral et al. 2018	RAC875_c32379_216	1A	61.0324	Li et al. 2018	3D	IWB38188	26.3	Su et al. 2018	1A	BS00033262_51	68.32
												Hu et al. 2019	2A	wsnp_Ex_c2426_4542393	81.631													Cabral et al. 2018	BS00078085_51	1A	61.0324	Li et al. 2018	3D	IWB9698	29.5	Su et al. 2018	1A	Tdurum_contig55009_1153	68.901
												Hu et al. 2019	2A	Excalibur_c41125_360	81.905													Cabral et al. 2018	BS00080076_51	1A	61.0324	Li et al. 2018	3D	IWB57116	31.4	Su et al. 2018	1A	Excalibur_c11374_1126	69.915
												Hu et al. 2019	2A	Kukri_c25978_561	83.071													Cabral et al. 2018	BS00095510_51	1A	61.0324	Li et al. 2018	3D	IWA5030	34.1	Su et al. 2018	1A	BS00008865_51	70.222
												Hu et al. 2019	2A	Kukri_c31117_93	83.267													Cabral et al. 2018	Ex_c2226_244	1A	61.0324	Li et al. 2018	3D	IW B58554	39.5	Su et al. 2018	1A	wsnp_Ex_c4605_8241260	71.253
												Hu et al. 2019	2A	RAC875_c33037_578	83.468													Cabral et al. 2018	IAAV130	1A	61.0324	Li et al. 2018	3D	IW B66510	413	Su et al. 2018	1A	wsnp_Ex_c645_1273590	71.526
												Hu et al. 2019	2A	wsnp_Ex_c23768_33006588	83.905													Cabral et al. 2018	RFL_Contig5334_1969	1A	61.0324	Li et al. 2018	3D	IWB65183	42.1	Su et al. 2018	1A	BS00022207_51	71.723
												Hu et al. 2019	2A	IAAV2861	83.972													Cabral et al. 2018	RFL_Contig5334_831	1A	61.0324	Li et al. 2018	3D	IWB48173	42.8	Su et al. 2018	1A	Tdurum_contig11004_400	72.818
												Hu et al. 2019	2A	wsnp_Ex_rep_c70299_69243401	84.707													Cabral et al. 2018	wsnp_CAP11_c1815_982483	1A	61.0324	Li et al. 2018	3D	IWB34976	45	Su et al. 2018	1A	Xgwm135	73.213
												Hu et al. 2019	2A	BS00022409_51	87.678													Cabral et al. 2018	wmc673b	1A	69.1783	Li et al. 2018	3D	IWB25194	45.9	Su et al. 2018	1A	Kukri_c10453_875	73.901
												Hu et al. 2019	2A	Tdurum_contig86183_221	88.172													Cabral et al. 2018	wsnp_Ex_c6488_11266589	1A	69.1783	Li et al. 2018	3D	IWB52937	48.7	Su et al. 2018	1A	wsnp_Ex_c45880_51550172	74.429
												Hu et al. 2019	2A	BS00030165_51	88.885													Cabral et al. 2018	BS00030043_51	1A	69.1783	Li et al. 2018	3D	IWB16174	51.2	Su et al. 2018	1A	IAAV8147	76.728
												Hu et al. 2019	2A	CAP7_c1527_136	96.159													Cabral et al. 2018	Kukri_c2951_1188	1A	69.1783	Li et al. 2018	3D	IWB18414	54.7	Su et al. 2018	1A	Excalibur_c10657_1280	78.552
												Hu et al. 2019	2A	Tdurum_contig67827_98	96.482													Cabral et al. 2018	Kukri_c82086_387	1A	69.1783	Li et al. 2018	3D	IWB51532	56.5	Su et al. 2018	1A	wsnp_Ex_c39661_46902689	79.05
												Hu et al. 2019	2A	Tdurum_contig47508_250	96.827													Cabral et al. 2018	wsnp_Ex_c3594_6568869	1A	69.1783	Li et al. 2018	3D	IW B18680	59	Su et al. 2018	1A	RAC875_c12808_182	79.791
												Hu et al. 2019	2A	BS00053834_51	97.039													Cabral et al. 2018	Kukri_c19653_1370	1A	70.2713	Li et al. 2018	3D	IWB5966	63.6	Su et al. 2018	1A	wsnp_Ex_c21450_30588044	82.066
												Hu et al. 2019	2A	Kukri_c44579_85	97.31													Cabral et al. 2018	BS00066212_51	1A	70.2713	Li et al. 2018	3D	IWB27554	71.7	Su et al. 2018	1A	Excalibur_c63243_361	82.066
												Hu et al. 2019	2A	BS00064324_51	98.206													Cabral et al. 2018	gwm497a	1A	70.2713	Li et al. 2018	3D	IWB18552	74.1	Su et al. 2018	1A	BS00022797_51	97.977
												Hu et al. 2019	2A	BS00011539_51	101.849													Cabral et al. 2018	wsnp_Ex_rep_c68171_66944702	1A	78.8391	Li et al. 2018	3D	。IWB8712	76.3	Su et al. 2018	1A	Xbarc17	102.176
												Hu et al. 2019	2A	Excalibur_c44834_80	102.882													Cabral et al. 2018	BobWhite_c5242_400	1A	78.8391	Li et al. 2018	3D	。IWB56772	78.3	Su et al. 2018	1A	Kukri_c1313_1158	103.431
												Hu et al. 2019	2A	Tdurum_contig53038_714	104.127													Cabral et al. 2018	TA002362-0785	1A	78.8391	Li et al. 2018	3D	IWB65709	81.7	Su et al. 2018	1A	wsnp_Ex_c3887_7051325	104.945
												Hu et al. 2019	2A	wsnp_Ex_c10555_17235832	106.176													Cabral et al. 2018	wsnp_BF474340A_Ta_2_1	1A	78.8391	Li et al. 2018	3D	。IWB551	83.3	Su et al. 2018	1A	wsnp_Ex_rep_c72011_70562321	107.728
												Hu et al. 2019	2A	Excalibur_c40335_198	107.486													Cabral et al. 2018	wsnp_Ex_c30552_39457767	1A	78.8391	Li et al. 2018	3D	. IWB66087	85.1	Su et al. 2018	1A	Kukri_c18608_729	107.728
												Hu et al. 2019	2A	BS00068691_51	108.812													Cabral et al. 2018	RAC875_c5016_314	1A	79.9321	Li et al. 2018	3D	. IW B2022	88.3	Su et al. 2018	1A	wsnp_JD_c12333_12595897	107.728
												Hu et al. 2019	2A	BS00000479_51	109.554													Cabral et al. 2018	wPt-9938	1A	82.8552	Li et al. 2018	3D	. IWB49215	91.2	Su et al. 2018	1A	Kukri_c18608_135	108.271
												Hu et al. 2019	2A	Kukri_c53501_305	110.614													Cabral et al. 2018	wPt-2847	1A	82.8552	Li et al. 2018	3D	. IWB17207	95.8	Su et al. 2018	1A	wsnp_Ex_c2918_5381441	108.44
												Hu et al. 2019	2B	Excalibur_c4705_660	0													Cabral et al. 2018	wPt-4408	1A	82.8552	Li et al. 2018	3D	。IWB45650	99.9	Su et al. 2018	1A	wsnp_Ex_c412_814247	108.618
												Hu et al. 2019	2B	BS00099658_51	6.025													Cabral et al. 2018	RAC875_c47930_448	1A	82.8552	Li et al. 2018	3D	. IWB2249	101.8	Su et al. 2018	1A	RAC875_c85550_73	108.669
												Hu et al. 2019	2B	Excalibur_c17250_592	13.376													Cabral et al. 2018	wPt-7339	1A	94.1548	Li et al. 2018	3D	. IWB48201	102.4	Su et al. 2018	1A	BS00067741_51	108.669
												Hu et al. 2019	2B	CAP7_c2441_492	14.034													Cabral et al. 2018	wPt-5367	1A	94.9011	Li et al. 2018	4A	IWB37183	0	Su et al. 2018	1A	wsnp_Ku_c754_1557338	109.264
												Hu et al. 2019	2B	wsnp_JD_rep_c49438_33652645	14.046													Cabral et al. 2018	wsnp_Ex_c10903_17716723	1A	94.9011	Li et al. 2018	4A	IWB52694	4.6	Su et al. 2018	1A	IAAV4435	109.264
												Hu et al. 2019	2B	RAC875_c8069_90	14.048													Cabral et al. 2018	gpw2010	1A	94.9011	Li et al. 2018	4A	IWB45656	4.7	Su et al. 2018	1A	wsnp_Ex_rep_c67492_66096650	110.343
												Hu et al. 2019	2B	BS00046019_51	14.749													Cabral et al. 2018	BobWhite_c10542_777	1A	94.9011	Li et al. 2018	4A	IWA4479	5.3	Su et al. 2018	1A	BS00070695_51	111.08
												Hu et al. 2019	2B	Excalibur_c42248_663	14.775													Cabral et al. 2018	BobWhite_c15256_225	1A	94.9011	Li et al. 2018	4A	IWB4310	5.8	Su et al. 2018	1A	BS00075271_51	111.08
												Hu et al. 2019	2B	BS00044332_51	15.211													Cabral et al. 2018	BobWhite_c19182_280	1A	94.9011	Li et al. 2018	4A	IWB41676	10.4	Su et al. 2018	1A	IAAV2162	111.08
												Hu et al. 2019	2B	RAC875_c38665_247	15.236													Cabral et al. 2018	BS00079087_51	1A	94.9011	Li et al. 2018	4A	IWB6547	15.7	Su et al. 2018	1A	BobWhite_c1027_1127	111.422
												Hu et al. 2019	2B	Ra_c1501_1220	15.947													Cabral et al. 2018	Excalibur_c23598_1502	1A	94.9011	Li et al. 2018	4A	IWB12779	17.2	Su et al. 2018	1A	Ku_c32704_43	112.95
												Hu et al. 2019	2B	Kukri_c46542_1015	17.057													Cabral et al. 2018	Kukri_c24753_460	1A	94.9011	Li et al. 2018	4A	IWA5457	19	Su et al. 2018	1A	wsnp_Ex_c9918_16332583	114.725
												Hu et al. 2019	2B	BobWhite_c13736_59	19.462													Cabral et al. 2018	Kukri_c51781_199	1A	94.9011	Li et al. 2018	4A	IWB33083	22.2	Su et al. 2018	1A	wsnp_Ex_rep_c66872_65273904	116.07
												Hu et al. 2019	2B	BS00076139_51	20.096													Cabral et al. 2018	Ra_c11613_81	1A	94.9011	Li et al. 2018	4A	IWA112	22.3	Su et al. 2018	1A	BS00065170_51	116.07
												Hu et al. 2019	2B	BS00065556_51	22.225													Cabral et al. 2018	Ra_c71093_408	1A	94.9011	Li et al. 2018	4A	IWB30090	24.6	Su et al. 2018	1A	Excalibur_c85499_232	116.07
												Hu et al. 2019	2B	wsnp_JD_c930_1368255	23.796													Cabral et al. 2018	RAC875_c19751_166	1A	94.9011	Li et al. 2018	4A	IWB61673	26.1	Su et al. 2018	1A	Kukri_c19837_432	116.07
												Hu et al. 2019	2B	BS00109330_51	30.723													Cabral et al. 2018	RAC875_c59190_384	1A	94.9011	Li et al. 2018	4A	IWB33160	289	Su et al. 2018	1A	wsnp_JD_rep_c65095_41464278	116.07
												Hu et al. 2019	2B	BS00099652_51	31.693													Cabral et al. 2018	RAC875_rep_c100394_536	1A	94.9011	Li et al. 2018	4A	IWB3663	30.4	Su et al. 2018	1A	CAP11_c1500_171	116.554
												Hu et al. 2019	2B	Kukri_c63748_1453	32.539													Cabral et al. 2018	RAC875_rep_c106165_772	1A	94.9011	Li et al. 2018	4A	IWA4742	33.4	Su et al. 2018	1A	IACX882	116.689
												Hu et al. 2019	2B	wsnp_Ex_c19371_28311667	32.769													Cabral et al. 2018	RAC875_rep_c71093_1070	1A	94.9011	Li et al. 2018	4A	IWB47331	34	Su et al. 2018	1A	RAC875_c52947_338	116.689
												Hu et al. 2019	2B	CAP8_c5108_139	36.282													Cabral et al. 2018	RAC875_rep_c71093_1302	1A	94.9011	Li et al. 2018	4A	IWB4910	37.1	Su et al. 2018	1A	wsnp_Ra_c6891_11974621	116.689
												Hu et al. 2019	2B	Kukri_c37311_790	36.874													Cabral et al. 2018	tplb0021i12_383	1A	94.9011	Li et al. 2018	4A	IWB5803	41.2	Su et al. 2018	1A	wsnp_Ex_rep_c69932_68893867	117.058
												Hu et al. 2019	2B	Tdurum_contig30210_226	36.876													Cabral et al. 2018	wsnp_CAP11_rep_c7847_3468669	1A	94.9011	Li et al. 2018	4A	IWB1321	42.7	Su et al. 2018	1A	Ra_c1295_635	117.959
												Hu et al. 2019	2B	wsnp_Ex_c10596_17293363	37.548													Cabral et al. 2018	wsnp_JD_rep_c49006_33254974	1A	94.9011	Li et al. 2018	4A	IWB9799	44	Su et al. 2018	1A	Ku_c23222_204	117.959
												Hu et al. 2019	2B	Tdurum_contig29563_109	39.333													Cabral et al. 2018	wsnp_Ku_c816_1684613	1A	95.4476	Li et al. 2018	4A	IWB4920	48.3	Su et al. 2018	1A	Kukri_c310_1953	118.62
												Hu et al. 2019	2B	Ex_c12051_875	39.714													Cabral et al. 2018	Excalibur_c41553_213	1A	95.4476	Li et al. 2018	4A	IWB35879	54.8	Su et al. 2018	1A	wsnp_Ex_c3201_5910659	119.168
												Hu et al. 2019	2B	BS00041585_51	41.075													Cabral et al. 2018	Tdurum_contig8224_378	1A	95.4476	Li et al. 2018	4A	IWB8103	57.3	Su et al. 2018	1A	BobWhite_c39668_143	121.655
												Hu et al. 2019	2B	BobWhite_c41535_52	43.102													Cabral et al. 2018	TA001430-0733	1A	95.4476	Li et al. 2018	4A	IWB9237	63.2	Su et al. 2018	1A	BS00022824_51	123.058
												Hu et al. 2019	2B	RAC875_c15844_348	43.43													Cabral et al. 2018	Excalibur_c16947_114	1A	95.4476	Li et al. 2018	4A	IWB54997	66.2	Su et al. 2018	1A	Excalibur_c27376_74	126.191
												Hu et al. 2019	2B	RAC875_c2014_153	43.951													Cabral et al. 2018	Excalibur_c16947_81	1A	95.4476	Li et al. 2018	4A	IWB2658	72	Su et al. 2018	1B	BS00066682_51	0
												Hu et al. 2019	2B	BS00022950_51	44.438													Cabral et al. 2018	Excalibur_c987_197	1A	95.4476	Li et al. 2018	4A	IWB27701	78.2	Su et al. 2018	1B	wsnp_Ex_c6022_10552811	7.2
												Hu et al. 2019	2B	RAC875_c34516_316	45.665													Cabral et al. 2018	Kukri_c2338_533	1A	95.4476	Li et al. 2018	4A	IWB6566	79.7	Su et al. 2018	1B	wsnp_BF485168B_Ta_2_1	7.655
												Hu et al. 2019	2B	BobWhite_c47608_304	45.837													Cabral et al. 2018	Kukri_c8757_107	1A	95.4476	Li et al. 2018	4A	IWB58036	80.9	Su et al. 2018	1B	Tdurum_contig83770_218	7.655
												Hu et al. 2019	2B	GENE-1421_706	45.995													Cabral et al. 2018	RAC875_c34515_343	1A	95.4476	Li et al. 2018	4A	IWB3325	86.1	Su et al. 2018	1B	Excalibur_c40993_1129	7.785
												Hu et al. 2019	2B	RAC875_c15229_108	46.364													Cabral et al. 2018	TA003411-0583	1A	95.4476	Li et al. 2018	4A	IWB44927	92.9	Su et al. 2018	1B	Kukri_c50086_537	7.901
												Hu et al. 2019	2B	Kukri_rep_c107572_121	46.471													Cabral et al. 2018	wsnp_Ex_c41553_48351921	1A	95.4476	Li et al. 2018	4A	IWB19112	96.1	Su et al. 2018	1B	Jagger_c5878_119	7.901
												Hu et al. 2019	2B	Tdurum_contig30680_120	46.813													Cabral et al. 2018	wsnp_Ra_c19637_28840370	1A	95.4476	Li et al. 2018	4A	IWB57221	101.2	Su et al. 2018	1B	Kukri_c44369_131	7.901
												Hu et al. 2019	2B	Excalibur_c9093_1469	47.25													Cabral et al. 2018	BobWhite_c6820_199	1A	96.5407	Li et al. 2018	4A	IWB59632	104.4	Su et al. 2018	1B	wsnp_CAP8_c4576_2228073	7.901
												Hu et al. 2019	2B	RAC875_c17720_436	47.267													Cabral et al. 2018	wsnp_Ex_c3264_6017750	1A	96.5407	Li et al. 2018	4A	IWB45236	107.3	Su et al. 2018	1B	Kukri_c2535_98	8.066
												Hu et al. 2019	2B	Tdurum_contig94176_65	47.59													Cabral et al. 2018	BobWhite_c11692_148	1A	97.6337	Li et al. 2018	4A	IWB4337	110.5	Su et al. 2018	1B	BS00031948_51	8.066
												Hu et al. 2019	2B	Tdurum_contig6194_931	49.561													Cabral et al. 2018	wsnp_Ex_c10631_17340809	1A	98.7268	Li et al. 2018	4A	IWB24206	114	Su et al. 2018	1B	BS00089524_51	8.066
												Hu et al. 2019	2B	Tdurum_contig54373_163	51.104													Cabral et al. 2018	Excalibur_c88792_93	1A	98.7268	Li et al. 2018	4A	IWB25909	115.6	Su et al. 2018	1B	Excalibur_c20228_135	8.066
												Hu et al. 2019	2B	Tdurum_contig61293_131	52.017													Cabral et al. 2018	GENE-3098_53	1A	98.7268	Li et al. 2018	4A	IWB20527	118.6	Su et al. 2018	1B	IAAV7260	8.066
												Hu et al. 2019	2B	Excalibur_c7136_823	52.121													Cabral et al. 2018	RAC875_c9386_358	1A	98.7268	Li et al. 2018	4A	IWB68900	121	Su et al. 2018	1B	IAAV8661	8.066
												Hu et al. 2019	2B	wsnp_JD_c3732_4781170	52.687													Cabral et al. 2018	RFL_Contig3683_1784	1A	98.7268	Li et al. 2018	4A	IWB64426	127.1	Su et al. 2018	1B	Ku_c62848_956	8.066
												Hu et al. 2019	2B	BS00043099_51	52.899													Cabral et al. 2018	wsnp_Ra_c36089_44508724	1A	98.7268	Li et al. 2018	4A	IWB8193	137.1	Su et al. 2018	1B	Kukri_c84940_106	8.066
												Hu et al. 2019	2B	wsnp_JD_c12687_12877994	52.906													Cabral et al. 2018	Jagger_c2152_123	1A	99.8199	Li et al. 2018	4A	. IWA8242	147.5	Su et al. 2018	1B	Ra_c1195_200	8.066
												Hu et al. 2019	2B	BS00029713_51	52.954													Cabral et al. 2018	BobWhite_c31322_391	1A	99.8199	Li et al. 2018	4A	1WB9476	155.5	Su et al. 2018	1B	Ra_c70039_1705	8.066
												Hu et al. 2019	2B	Tdurum_contig81323_291	53.034													Cabral et al. 2018	wsnp_JD_c6664_7807201	1A	100.913	Li et al. 2018	4A	IWB1522	165.5	Su et al. 2018	1B	Ra_c7745_1438	8.066
												Hu et al. 2019	2B	Tdurum_contig60978_352	53.428													Cabral et al. 2018	BobWhite_c6664_644	1A	100.913	Li et al. 2018	4B	IWB72527	0	Su et al. 2018	1B	RAC875_c30381_573	8.066
												Hu et al. 2019	2B	BS00071690_51	54.028													Cabral et al. 2018	Excalibur_c17320_833	1A	101.459	Li et al. 2018	4B	IWB6080	2.5	Su et al. 2018	1B	RAC875_c5243_206	8.066
												Hu et al. 2019	2B	RAC875_c35438_474	54.564													Cabral et al. 2018	RAC875_c1599_342	1A	101.459	Li et al. 2018	4B	IWB63081	4.2	Su et al. 2018	1B	RAC875_c5243_479	8.066
												Hu et al. 2019	2B	RFL_Contig1633_304	55.624													Cabral et al. 2018	wmc59	1A	101.459	Li et al. 2018	4B	IWB74226	7.5	Su et al. 2018	1B	RAC875_c63624_1040	8.066
												Hu et al. 2019	2B	JD_c39990_130	55.891													Cabral et al. 2018	IAAV4820	1A	101.459	Li et al. 2018	4B	IWB9135	9.1	Su et al. 2018	1B	RAC875_c78751_587	8.066
												Hu et al. 2019	2B	Kukri_c60090_82	55.898													Cabral et al. 2018	wsnp_Ku_c14496_22838796	1A	104.761	Li et al. 2018	4B	IWB13107	11.4	Su et al. 2018	1B	RAC875_rep_c117462_124	8.066
												Hu et al. 2019	2B	IACX6411	55.902													Cabral et al. 2018	wsnp_Ex_rep_c103474_88421290	1A	108.615	Li et al. 2018	4B	IWB66458	13.3	Su et al. 2018	1B	RFL_Contig1354_484	8.066
												Hu et al. 2019	2B	wsnp_Ex_c57_116914	55.91													Cabral et al. 2018	IAAV1930	1A	108.615	Li et al. 2018	4B	IWB23111	15.5	Su et al. 2018	1B	RFL_Contig1354_663	8.066
												Hu et al. 2019	2B	RAC875_c4430_2213	55.915													Cabral et al. 2018	IAAV2844	1A	108.615	Li et al. 2018	4B	IWB63894	17.1	Su et al. 2018	1B	TA015141-0717	8.066
												Hu et al. 2019	2B	Ku_c23446_2209	55.918													Cabral et al. 2018	IAAV6100	1A	108.615	Li et al. 2018	4B	IWB45065	18.4	Su et al. 2018	1B	Tdurum_contig31201_201	8.066
												Hu et al. 2019	2B	BS00088575_51	56.111													Cabral et al. 2018	Kukri_c17412_1249	1A	108.615	Li et al. 2018	4B	IWA102	21	Su et al. 2018	1B	Tdurum_contig63991_186	8.066
												Hu et al. 2019	2B	Excalibur_c721_484	56.19													Cabral et al. 2018	RAC875_c62550_470	1A	108.615	Li et al. 2018	4B	IWB46582	21.2	Su et al. 2018	1B	tplb0024i16_1177	8.066
												Hu et al. 2019	2B	Tdurum_contig83066_276	56.288													Cabral et al. 2018	RAC875_rep_c71278_345	1A	108.615	Li et al. 2018	4B	IWB56735	21.6	Su et al. 2018	1B	wsnp_JD_c4444_5575748	8.066
												Hu et al. 2019	2B	BS00059315_51	56.535													Cabral et al. 2018	wsnp_Ex_c15377_23637176	1A	108.615	Li et al. 2018	4B	IWB54814	22.1	Su et al. 2018	1B	RAC875_c37031_312	8.398
												Hu et al. 2019	2B	Excalibur_c15031_73	56.637													Cabral et al. 2018	wsnp_Ex_c36911_44767554	1A	108.615	Li et al. 2018	4B	IWB23074	24.1	Su et al. 2018	1B	BS00106626_51	9.031
												Hu et al. 2019	2B	BS00022949_51	56.964													Cabral et al. 2018	gpw4305b	1A	109.948	Li et al. 2018	4B	IWB59992	26.2	Su et al. 2018	1B	wsnp_Ex_c1600_3051075	9.19
												Hu et al. 2019	2B	BS00022417_51	56.987													Cabral et al. 2018	BS00070991_51	1A	111.282	Li et al. 2018	4B	IWB21502	26.3	Su et al. 2018	1B	Ra_c62804_1641	9.406
												Hu et al. 2019	2B	wsnp_CAP12_rep_c4678_2134259	56.998													Cabral et al. 2018	RAC875_c5119_2696	1A	111.282	Li et al. 2018	4B	IWB8217	27	Su et al. 2018	1B	wsnp_Ex_c8865_14815305	9.609
												Hu et al. 2019	2B	RAC875_c41242_133	57.033													Cabral et al. 2018	wsnp_Ex_rep_c67492_66096650	1A	111.282	Li et al. 2018	4B	IWB67854	27.3	Su et al. 2018	1B	BS00067434_51	9.699
												Hu et al. 2019	2B	GENE-3867_1133	57.182													Cabral et al. 2018	BobWhite_c1027_1127	1A	111.282	Li et al. 2018	4B	IWB44841	28.3	Su et al. 2018	1B	BS00022632_51	9.904
												Hu et al. 2019	2B	Tdurum_contig94806_361	57.343													Cabral et al. 2018	BS00067170_51	1A	111.282	Li et al. 2018	4B	IWB10740	28.5	Su et al. 2018	1B	RAC875_rep_c70803_1442	10.069
												Hu et al. 2019	2B	Ra_c6728_590	57.41													Cabral et al. 2018	BS00070695_51	1A	111.282	Li et al. 2018	4B	IWB178481	30	Su et al. 2018	1B	wsnp_Ku_c30982_40765254	10.095
												Hu et al. 2019	2B	Excalibur_c16798_244	57.567													Cabral et al. 2018	BS00075271_51	1A	111.282	Li et al. 2018	4B	IWB24800	31	Su et al. 2018	1B	IAAV2546	10.095
												Hu et al. 2019	2B	RAC875_c14420_100	57.568													Cabral et al. 2018	Excalibur_c12932_2102	1A	111.282	Li et al. 2018	4B	IWB54160	31.4	Su et al. 2018	1B	Ku_c11394_862	10.095
												Hu et al. 2019	2B	IAAV2784	57.571													Cabral et al. 2018	Excalibur_c27376_74	1A	111.282	Li et al. 2018	4B	IWA7537	32.3	Su et al. 2018	1B	wsnp_Ex_c38116_45719983	10.095
												Hu et al. 2019	2B	Excalibur_c26042_260	57.724													Cabral et al. 2018	Excalibur_c46365_304	1A	111.282	Li et al. 2018	4B	IWA3874	333.8	Su et al. 2018	1B	wsnp_Ku_c30982_40765341	10.095
												Hu et al. 2019	2B	wsnp_Ex_c6537_11338763	58.315													Cabral et al. 2018	Excalibur_rep_c67492_1119	1A	111.282	Li et al. 2018	4B	IWB40589	35.2	Su et al. 2018	1B	BS00022670_51	10.132
												Hu et al. 2019	2B	wsnp_Ku_c4042_7375053	58.323													Cabral et al. 2018	GENE-0543_1074	1A	111.282	Li et al. 2018	4B	IWB11774	37.1	Su et al. 2018	1B	Kukri_c30982_1173	10.272
												Hu et al. 2019	2B	wsnp_Ex_rep_c68704_67559626	58.324													Cabral et al. 2018	GENE-0543_113	1A	111.282	Li et al. 2018	4B	IWA4248	39	Su et al. 2018	1B	Kukri_c2297_181	10.454
												Hu et al. 2019	2B	BS00022969_51	58.327													Cabral et al. 2018	GENE-0543_594	1A	111.282	Li et al. 2018	4B	IWB25207	41.3	Su et al. 2018	1B	CAP7_c302_518	10.457
												Hu et al. 2019	2B	wsnp_Ex_c20786_29874875	58.342													Cabral et al. 2018	IAAV2162	1A	111.282	Li et al. 2018	4B	IWB51369	43.1	Su et al. 2018	1B	BS00052075_51	10.457
												Hu et al. 2019	2B	GENE-1430_599	58.383													Cabral et al. 2018	Kukri_c4204_1346	1A	111.282	Li et al. 2018	4B	IWB6048	47	Su et al. 2018	1B	BS00052089_51	10.457
												Hu et al. 2019	2B	Tdurum_contig18197_86	59.239													Cabral et al. 2018	Kukri_c4204_1673	1A	111.282	Li et al. 2018	4B	IWB24289	47.2	Su et al. 2018	1B	GENE-0193_197	10.457
												Hu et al. 2019	2B	BS00066905_51	59.315													Cabral et al. 2018	Kukri_c4204_1946	1A	111.282	Li et al. 2018	4B	IWB36159	49.4	Su et al. 2018	1B	Ra_c23839_884	10.457
												Hu et al. 2019	2B	BobWhite_c662_148	59.327													Cabral et al. 2018	Tdurum_contig11349_810	1A	111.282	Li et al. 2018	4B	IWB35006	51.1	Su et al. 2018	1B	Ra_c33845_794	10.457
												Hu et al. 2019	2B	Kukri_c36783_91	59.641													Cabral et al. 2018	RFL_Contig3395_1311	1A	112.375	Li et al. 2018	4B	IWB44155	54.3	Su et al. 2018	1B	BS00060270_51	10.715
												Hu et al. 2019	2B	wsnp_Ex_c30_66389	60.133													Cabral et al. 2018	BS00062759_51	1A	112.375	Li et al. 2018	4B	IWB75280	57	Su et al. 2018	1B	BS00078228_51	10.715
												Hu et al. 2019	2B	Excalibur_c9248_771	60.359													Cabral et al. 2018	Tdurum_contig52086_129	1A	112.375	Li et al. 2018	4B	IWB24856	60.3	Su et al. 2018	1B	BS00110148_51	10.715
												Hu et al. 2019	2B	wsnp_JD_c4699_5834958	61.82													Cabral et al. 2018	gpw3142	1A	112.375	Li et al. 2018	4B	IWB74054	63.6	Su et al. 2018	1B	Excalibur_c29127_552	10.715
												Hu et al. 2019	2B	wsnp_Ku_c12900_20727771	62.788													Cabral et al. 2018	wsnp_Ex_c46670_52108070	1A	118.738	Li et al. 2018	4B	IWA1100	66.4	Su et al. 2018	1B	JD_c64600_281	10.715
												Hu et al. 2019	2B	wsnp_Ku_c2725_5163093	63.745													Cabral et al. 2018	barc158	1A	118.738	Li et al. 2018	4B	IWB9757	69.1	Su et al. 2018	1B	tplb0023b14_704	10.715
												Hu et al. 2019	2B	wsnp_BF291736B_Ta_1_1	64.532													Cabral et al. 2018	BobWhite_c66315_505	1A	118.738	Li et al. 2018	4B	IWA7880	72.2	Su et al. 2018	1B	wsnp_Ex_rep_c67036_65492436	10.715
												Hu et al. 2019	2B	IAAV2018	64.882													Cabral et al. 2018	Kukri_c18608_729	1A	118.738	Li et al. 2018	4B	IWB3641	75.7	Su et al. 2018	1B	Tdurum_contig8081_2331	10.804
												Hu et al. 2019	2B	wsnp_Ex_c33246_41764093	66.252													Cabral et al. 2018	tplb0059i08_441	1A	118.738	Li et al. 2018	4B	IWB23476	78.3	Su et al. 2018	1B	wsnp_Ex_c17452_26163465	10.853
												Hu et al. 2019	2B	Kukri_rep_c69267_496	67.521													Cabral et al. 2018	wsnp_Ex_c4186_7560575	1A	118.738	Li et al. 2018	4B	IWB53167	81.2	Su et al. 2018	1B	wsnp_Ra_c25590_35156699	10.921
												Hu et al. 2019	2B	RAC875_c12968_1526	67.622													Cabral et al. 2018	barc211a	1A	119.958	Li et al. 2018	4B	IWA2869	84.2	Su et al. 2018	1B	BS00069723_51	11.053
												Hu et al. 2019	2B	wsnp_Ex_c7003_12065828	68.067													Cabral et al. 2018	barc287a	1A	119.958	Li et al. 2018	4B	IWB40140	87.1	Su et al. 2018	1B	BS00041355_51	11.11
												Hu et al. 2019	2B	BS00007901_51	68.38													Cabral et al. 2018	Kukri_c18951_493	1B.1	0	Li et al. 2018	4B	IWB50455	90.1	Su et al. 2018	1B	Tdurum_contig58301_336	11.297
												Hu et al. 2019	2B	Excalibur_c584_726	68.513													Cabral et al. 2018	BS00050522_51	1B.1	0	Li et al. 2018	5A	IWB41384	0	Su et al. 2018	1B	BS00023001_51	11.297
												Hu et al. 2019	2B	Kukri_c7885_1335	69.975													Cabral et al. 2018	wPt-8320	1B.1	7.38661	Li et al. 2018	5A	IWB56220	8	Su et al. 2018	1B	BS00072982_51	11.297
												Hu et al. 2019	2B	Ra_c2527_1124	70.768													Cabral et al. 2018	wPt-0983	1B.1	7.38661	Li et al. 2018	5A	IWB21804	16.1	Su et al. 2018	1B	CAP7_c12162_251	11.297
												Hu et al. 2019	2B	BS00029146_51	71.087													Cabral et al. 2018	BS00082565_51	1B.1	8.07158	Li et al. 2018	5A	IWB21456	24.3	Su et al. 2018	1B	Excalibur_rep_c103109_88	11.297
												Hu et al. 2019	2B	BS00071346_51	71.11													Cabral et al. 2018	BS00014831	1B.1	8.07158	Li et al. 2018	5A	IW22285	32.8	Su et al. 2018	1B	Ku_c20478_390	11.297
												Hu et al. 2019	2B	RAC875_c20628_111	71.312													Cabral et al. 2018	BS00015608	1B.1	8.07158	Li et al. 2018	5A	IWA8582	40.2	Su et al. 2018	1B	Kukri_c32430_109	11.297
												Hu et al. 2019	2B	JD_c800_1249	71.411													Cabral et al. 2018	BobWhite_c5793_372	1B.1	8.07158	Li et al. 2018	5A	IWB70838	49.1	Su et al. 2018	1B	Kukri_c50572_263	11.297
												Hu et al. 2019	2B	Kukri_c27532_148	71.98													Cabral et al. 2018	BS00022504_51	1B.1	8.07158	Li et al. 2018	5A	IWB23789	53.2	Su et al. 2018	1B	Ra_c6701_506	11.297
												Hu et al. 2019	2B	RAC875_c45600_228	72.192													Cabral et al. 2018	BS00022505_51	1B.1	8.07158	Li et al. 2018	5A	IWB1040	61.6	Su et al. 2018	1B	RAC875_c6701_291	11.297
												Hu et al. 2019	2B	RFL_Contig4849_702	72.801													Cabral et al. 2018	BS00062605_51	1B.1	8.07158	Li et al. 2018	5A	IWB10054	69	Su et al. 2018	1B	RAC875_c87890_234	11.297
												Hu et al. 2019	2B	BS00066545_51	73.058													Cabral et al. 2018	BS00111170_51	1B.1	8.07158	Li et al. 2018	5A	IWB65552	73.6	Su et al. 2018	1B	RAC875_c87890_312	11.297
												Hu et al. 2019	2B	wsnp_Ex_rep_c101349_86725007	73.212													Cabral et al. 2018	Kukri_c37738_417	1B.1	8.07158	Li et al. 2018	5A	IWA5326	75.4	Su et al. 2018	1B	tplb0024i15_1754	11.297
												Hu et al. 2019	2B	wsnp_Ku_c3780_6950286	73.28													Cabral et al. 2018	Kukri_c79308_278	1B.1	8.07158	Li et al. 2018	5A	IW84449	75.9	Su et al. 2018	1B	wsnp_BG313767B_Ta_2_1	11.297
												Hu et al. 2019	2B	Excalibur_rep_c86787_98	73.508													Cabral et al. 2018	RAC875_c24163_155	1B.1	8.07158	Li et al. 2018	5A	IWA2447	76.4	Su et al. 2018	1B	wsnp_Ex_c30969_39821293	11.297
												Hu et al. 2019	2B	RFL_Contig1953_583	73.804													Cabral et al. 2018	RAC875_c30138_595	1B.1	8.07158	Li et al. 2018	5A	IWB36569	79.8	Su et al. 2018	1B	wsnp_Ex_c6611_11451949	11.297
												Hu et al. 2019	2B	Tdurum_contig27880_199	74.284													Cabral et al. 2018	RFL_Contig2831_1012	1B.1	8.07158	Li et al. 2018	5A	IWA6747	81.6	Su et al. 2018	1B	wsnp_Ku_c39862_48205590	11.297
												Hu et al. 2019	2B	wsnp_CAP11_c5554_2579815	74.486													Cabral et al. 2018	TA001594-0748	1B.1	8.07158	Li et al. 2018	5A	IWB11226	82	Su et al. 2018	1B	wsnp_Ra_c11232_18256748	11.297
												Hu et al. 2019	2B	RFL_Contig1987_3440	76.796													Cabral et al. 2018	Tdurum_contig28703_293	1B.1	8.07158	Li et al. 2018	5A	IWB55464	83.8	Su et al. 2018	1B	wsnp_Ra_c5088_9081927	11.297
												Hu et al. 2019	2B	Tdurum_contig26542_457	77.66													Cabral et al. 2018	Glu-B3	1B.1	8.07158	Li et al. 2018	5A	IWB68680	86.9	Su et al. 2018	1B	wsnp_Ex_c23992_33235984	11.341
												Hu et al. 2019	2B	BobWhite_rep_c54341_99	77.663													Cabral et al. 2018	wPt-2395	1B.1	8.07158	Li et al. 2018	5A	IWB41058	87.7	Su et al. 2018	1B	Ex_c102909_778	11.416
												Hu et al. 2019	2B	Excalibur_rep_c66577_159	77.839													Cabral et al. 2018	wPt-2988	1B.1	8.07158	Li et al. 2018	5A	IWA4914	89.9	Su et al. 2018	1B	IAAV4702	11.416
												Hu et al. 2019	2B	RFL_Contig4718_1269	78.147													Cabral et al. 2018	Kukri_rep_c106834_139	1B.1	8.07158	Li et al. 2018	5A	IWA5612	92.4	Su et al. 2018	1B	Ra_c1652_588	11.416
												Hu et al. 2019	2B	Ra_c111671_555	78.412													Cabral et al. 2018	BS00022323_51	1B.1	8.07158	Li et al. 2018	5A	IWB43972	93.3	Su et al. 2018	1B	Ex_c24969_223	11.833
												Hu et al. 2019	2B	BS00091068_51	79.018													Cabral et al. 2018	Excalibur_c5562_380	1B.1	8.07158	Li et al. 2018	5A	IWB35355	93.8	Su et al. 2018	1B	tplb0029b01_1022	11.833
												Hu et al. 2019	2B	IACX11084	79.372													Cabral et al. 2018	Kukri_c8390_1515	1B.1	9.16465	Li et al. 2018	5A	IWA6468	96.4	Su et al. 2018	1B	BobWhite_c22266_315	11.971
												Hu et al. 2019	2B	GENE-4029_80	79.383													Cabral et al. 2018	Kukri_c8390_1102	1B.1	9.16465	Li et al. 2018	5A	IWA7405	98.8	Su et al. 2018	1B	RFL_Contig239_377	12.313
												Hu et al. 2019	2B	wsnp_BE490763B_Ta_2_1	80.116													Cabral et al. 2018	RAC875_rep_c74067_541	1B.1	9.16465	Li et al. 2018	5A	IWA3827	100.3	Su et al. 2018	1B	Tdurum_contig59449_249	12.313
												Hu et al. 2019	2B	BobWhite_c16130_362	80.337													Cabral et al. 2018	Kukri_c38553_173	1B.1	10.2577	Li et al. 2018	5A	IWB45155	104	Su et al. 2018	1B	Excalibur_c66050_450	12.546
												Hu et al. 2019	2B	RAC875_c14775_1048	81.149													Cabral et al. 2018	Ra_c40444_302	1B.1	10.2577	Li et al. 2018	5A	IWB11307	107.1	Su et al. 2018	1B	wsnp_Ex_c1412_2711077	13.007
												Hu et al. 2019	2B	wsnp_JD_c2273_3105037	81.51													Cabral et al. 2018	RAC875_c40444_84	1B.1	10.2577	Li et al. 2018	5A	IWB1162	110.7	Su et al. 2018	1B	Tdurum_contig63991_280	13.359
												Hu et al. 2019	2B	BS00105315_51	82.656													Cabral et al. 2018	Excalibur_c30569_384	1B.1	10.2577	Li et al. 2018	5A	IWB45710	114.5	Su et al. 2018	1B	wsnp_Ex_c5780_10153638	13.359
												Hu et al. 2019	2B	Ku_c12037_482	82.919													Cabral et al. 2018	RAC875_c8282_644	1B.1	11.8977	Li et al. 2018	5A	IWB43081	117.3	Su et al. 2018	1B	RAC875_c23743_552	13.957
												Hu et al. 2019	2B	Kukri_c32700_104	82.939													Cabral et al. 2018	BS00066271_51	1B.1	11.8977	Li et al. 2018	5A	IWA2363	120.3	Su et al. 2018	1B	RAC875_c5556_328	16.23
												Hu et al. 2019	2B	Kukri_c43745_1935	83.153													Cabral et al. 2018	Excalibur_c43567_633	1B.1	11.8977	Li et al. 2018	5A	IWA12	126.1	Su et al. 2018	1B	RFL_Contig5937_1699	22.026
												Hu et al. 2019	2B	Tdurum_contig68666_570	83.264													Cabral et al. 2018	Kukri_c8390_441	1B.1	11.8977	Li et al. 2018	5A	IW B63597	129	Su et al. 2018	1B	wsnp_Ex_c3147_5816957	24.795
												Hu et al. 2019	2B	Kukri_rep_c112675_676	83.518													Cabral et al. 2018	Kukri_c8390_547	1B.1	11.8977	Li et al. 2018	5A	IWB46410	135.3	Su et al. 2018	1B	Tdurum_contig10362_555	26.555
												Hu et al. 2019	2B	Excalibur_c31737_169	83.703													Cabral et al. 2018	RAC875_c9457_457	1B.1	17.384	Li et al. 2018	5A	IW B20355	138.8	Su et al. 2018	1B	BS00006033_51	26.75
												Hu et al. 2019	2B	Excalibur_c5064_765	83.982													Cabral et al. 2018	BS00108242_51	1B.1	17.384	Li et al. 2018	5A	IWB32931	142.6	Su et al. 2018	1B	Kukri_s117372_152	26.75
												Hu et al. 2019	2B	Excalibur_rep_c67411_210	84.023													Cabral et al. 2018	IAAV3773	1B.1	17.384	Li et al. 2018	5A	IWB8767	145.1	Su et al. 2018	1B	wsnp_JD_rep_c63201_40318622	26.75
												Hu et al. 2019	2B	Kukri_c6552_4243	84.046													Cabral et al. 2018	RAC875_rep_c104133_1757	1B.1	18.4771	Li et al. 2018	5A	IWB832	148.3	Su et al. 2018	1B	IACX1891	27.084
												Hu et al. 2019	2B	RAC875_c54947_108	84.071													Cabral et al. 2018	BS00022429_51	1B.1	18.4771	Li et al. 2018	5A	IWB8292	150.8	Su et al. 2018	1B	Kukri_c30461_857	27.084
												Hu et al. 2019	2B	RAC875_c14316_584	84.125													Cabral et al. 2018	BS00065487_51	1B.1	18.4771	Li et al. 2018	5A	IWB912	154	Su et al. 2018	1B	RFL_Contig2736_827	27.084
												Hu et al. 2019	2B	wsnp_Ex_c2445_4573233	84.735													Cabral et al. 2018	Excalibur_c2868_1808	1B.1	18.4771	Li et al. 2018	5A	IWA2163	157.2	Su et al. 2018	1B	wsnp_BE590634B_Ta_2_1	27.084
												Hu et al. 2019	2B	GENE-0675_161	84.789													Cabral et al. 2018	Excalibur_rep_c110294_82	1B.1	18.4771	Li et al. 2018	5A	IWA1942	163.4	Su et al. 2018	1B	wsnp_BE590634B_Ta_2_5	27.084
												Hu et al. 2019	2B	wsnp_BF473744B_Ta_2_2	85.178													Cabral et al. 2018	IAAV392	1B.1	18.4771	Li et al. 2018	5A	IWB58284	166.3	Su et al. 2018	1B	RFL_Contig2176_1163	27.611
												Hu et al. 2019	2B	RAC875_c3947_441	85.327													Cabral et al. 2018	Kukri_c17467_2711	1B.1	18.4771	Li et al. 2018	5A	IWB11590	173.4	Su et al. 2018	1B	BS00023071_51	27.611
												Hu et al. 2019	2B	Kukri_c4294_371	85.601													Cabral et al. 2018	Kukri_c35451_437	1B.1	18.4771	Li et al. 2018	5A	IWA2947	178	Su et al. 2018	1B	BS00064162_51	27.611
												Hu et al. 2019	2B	Tdurum_contig22828_244	85.621													Cabral et al. 2018	RAC875_c11276_340	1B.1	18.4771	Li et al. 2018	5A	IWB6192	179.2	Su et al. 2018	1B	Excalibur_c44818_109	27.611
												Hu et al. 2019	2B	Kukri_c92273_67	85.995													Cabral et al. 2018	RAC875_c16981_691	1B.1	18.4771	Li et al. 2018	5B	IWB38096	0	Su et al. 2018	1B	RAC875_c39401_229	27.611
												Hu et al. 2019	2B	BS00022717_51	86.262													Cabral et al. 2018	Tdurum_contig8791_415	1B.1	18.4771	Li et al. 2018	5B	IWB10994	4.7	Su et al. 2018	1B	RFL_Contig2176_932	27.611
												Hu et al. 2019	2B	Excalibur_rep_c66832_742	86.628													Cabral et al. 2018	CAP12_c1619_54	1B.1	20.6763	Li et al. 2018	5B	IWB7564	9.1	Su et al. 2018	1B	Ku_c7195_2622	27.611
												Hu et al. 2019	2B	wsnp_Ex_c19772_28771627	86.785													Cabral et al. 2018	RAC875_c3692_2287	1B.1	22.3253	Li et al. 2018	5B	W36119	13.2	Su et al. 2018	1B	CAP7_c1137_53	27.611
												Hu et al. 2019	2B	Kukri_rep_c108243_143	86.976													Cabral et al. 2018	BS00010508	1B.1	22.3253	Li et al. 2018	5B	IWB60171	18.8	Su et al. 2018	1B	Kukri_c13978_132	27.611
												Hu et al. 2019	2B	Tdurum_contig96648_102	87.256													Cabral et al. 2018	Excalibur_c64866_259	1B.1	22.3253	Li et al. 2018	5B	IWB19835	21.6	Su et al. 2018	1B	RAC875_c39401_277	27.611
												Hu et al. 2019	2B	wsnp_Ex_c5123_9087869	87.309													Cabral et al. 2018	IAAV423	1B.1	22.3253	Li et al. 2018	5B	IWB6908	24.1	Su et al. 2018	1B	RAC875_c39401_502	27.611
												Hu et al. 2019	2B	BS00046165_51	87.326													Cabral et al. 2018	Ku_c17846_363	1B.1	22.3253	Li et al. 2018	5B	IWB12308	27.2	Su et al. 2018	1B	RFL_Contig2176_1111	27.611
												Hu et al. 2019	2B	BS00021713_51	87.389													Cabral et al. 2018	Kukri_c36151_170	1B.1	22.3253	Li et al. 2018	5B	IWB37199	33.8	Su et al. 2018	1B	Tdurum_contig27843_142	27.611
												Hu et al. 2019	2B	Tdurum_contig27907_216	87.629													Cabral et al. 2018	RAC875_c1471_566	1B.1	22.3253	Li et al. 2018	5B	IWB15500	36.6	Su et al. 2018	1B	Tdurum_contig27843_281	27.611
												Hu et al. 2019	2B	BS00046164_51	87.748													Cabral et al. 2018	wsnp_Ex_c5469_9655281	1B.1	22.8718	Li et al. 2018	5B	IWB74062	40.3	Su et al. 2018	1B	Tdurum_contig27843_375	27.611
												Hu et al. 2019	2B	wsnp_Ex_rep_c102127_87360034	87.969													Cabral et al. 2018	BobWhite_c56724_80	1B.1	22.8718	Li et al. 2018	5B	IWB26321	40.7	Su et al. 2018	1B	Tdurum_contig27860_478	27.611
												Hu et al. 2019	2B	BS00021896_51	87.981													Cabral et al. 2018	BS00023177_51	1B.1	22.8718	Li et al. 2018	5B	IWB3400	45.3	Su et al. 2018	1B	Tdurum_contig85180_99	27.611
												Hu et al. 2019	2B	Tdurum_contig27907_359	88.184													Cabral et al. 2018	BS00109985_51	1B.1	22.8718	Li et al. 2018	5B	IWB558	48	Su et al. 2018	1B	BS00083060_51	28.485
												Hu et al. 2019	2B	RFL_Contig2577_584	88.422													Cabral et al. 2018	CAP11_c852_366	1B.1	22.8718	Li et al. 2018	5B	IWB43821	54.8	Su et al. 2018	1B	RAC875_c1785_366	29.983
												Hu et al. 2019	2B	BS00065136_51	88.541													Cabral et al. 2018	D_F5XZDLF01B50S3_317	1B.1	22.8718	Li et al. 2018	5B	IWB29630	60.5	Su et al. 2018	1B	IACX6230	0
												Hu et al. 2019	2B	Excalibur_c80601_83	88.714													Cabral et al. 2018	Excalibur_c17152_852	1B.1	22.8718	Li et al. 2018	5B	IWB17929	78.4	Su et al. 2018	1B	BS00010392_51	1.2
												Hu et al. 2019	2B	Excalibur_c43926_163	88.736													Cabral et al. 2018	Excalibur_c28255_430	1B.1	22.8718	Li et al. 2018	5B	IWB56759	84.1	Su et al. 2018	1B	RAC875_c818_1185	1.33
												Hu et al. 2019	2B	wsnp_BQ172173B_Ta_2_2	89.443													Cabral et al. 2018	Excalibur_c28255_482	1B.1	22.8718	Li et al. 2018	5B	IWB2066	90.9	Su et al. 2018	1B	wsnp_Ku_c51703_56915288	1.495
												Hu et al. 2019	2B	Tdurum_contig12879_320	89.773													Cabral et al. 2018	Excalibur_c63663_93	1B.1	22.8718	Li et al. 2018	5B	IWB626	96.1	Su et al. 2018	1B	wsnp_Ku_c18881_28259811	1.648
												Hu et al. 2019	2B	Tdurum_contig56876_449	90.124													Cabral et al. 2018	Excalibur_c95327_126	1B.1	22.8718	Li et al. 2018	5B	IWB38230	102.4	Su et al. 2018	1B	BS00032076_51	1.648
												Hu et al. 2019	2B	wsnp_Ra_c3955_7262354	90.524													Cabral et al. 2018	Excalibur_c95327_51	1B.1	22.8718	Li et al. 2018	5B	IWB1762	108.9	Su et al. 2018	1B	BS00032077_51	1.648
												Hu et al. 2019	2B	Tdurum_contig28795_322	90.994													Cabral et al. 2018	Kukri_c29655_155	1B.1	22.8718	Li et al. 2018	5B	IWB5738	118.1	Su et al. 2018	1B	TA004668-0687	1.684
												Hu et al. 2019	2B	wsnp_Ex_c45468_51254832	91.491													Cabral et al. 2018	Kukri_c29655_194	1B.1	22.8718	Li et al. 2018	5B	IWB47298	124.3	Su et al. 2018	1B	Excalibur_c25597_508	1.774
												Hu et al. 2019	2B	IAAV1776	91.996													Cabral et al. 2018	Kukri_c46939_83	1B.1	22.8718	Li et al. 2018	5B	WB68074	130.4	Su et al. 2018	1B	IAAV7428	1.884
												Hu et al. 2019	2B	BobWhite_c15453_1010	92.808													Cabral et al. 2018	RAC875_c78751_587	1B.1	22.8718	Li et al. 2018	5B	IWB30048	136	Su et al. 2018	1B	wsnp_Ex_c48677_53513032	1.995
												Hu et al. 2019	2B	Kukri_c30659_91	92.812													Cabral et al. 2018	RFL_Contig4140_1183	1B.1	22.8718	Li et al. 2018	5B	IWA6722	139	Su et al. 2018	1B	Excalibur_c8585_561	5.097
												Hu et al. 2019	2B	RAC875_c35778_201	92.866													Cabral et al. 2018	wsnp_Ex_c13421_21142520	1B.1	22.8718	Li et al. 2018	5B	IWB60247	142.7	Su et al. 2018	1B	BobWhite_c23617_167	5.296
												Hu et al. 2019	2B	BS00094578_51	93.526													Cabral et al. 2018	wsnp_Ex_c1375_2633027	1B.1	22.8718	Li et al. 2018	5B	IWA4954	46.5	Su et al. 2018	1B	Tdurum_contig50988_500	5.296
												Hu et al. 2019	2B	BS00086676_51	93.539													Cabral et al. 2018	wsnp_Ex_c5469_9654931	1B.1	22.8718	Li et al. 2018	5B	IWB27255	147.2	Su et al. 2018	1B	BS00021934_51	5.587
												Hu et al. 2019	2B	RFL_Contig4499_1145	93.691													Cabral et al. 2018	wsnp_Ku_c13229_21142262	1B.1	22.8718	Li et al. 2018	5B	IWB20789	149.5	Su et al. 2018	1B	RFL_Contig1823_1044	5.736
												Hu et al. 2019	2B	BS00022374_51	93.924													Cabral et al. 2018	wsnp_Ku_c13229_21142792	1B.1	22.8718	Li et al. 2018	5B	IWB10952	155.2	Su et al. 2018	1B	wsnp_RFL_Contig3951_4390396	5.736
												Hu et al. 2019	2B	BS00009060_51	94.28													Cabral et al. 2018	wsnp_Ku_rep_c103074_89904851	1B.1	22.8718	Li et al. 2018	5B	IWB7719	158.3	Su et al. 2018	1B	Tdurum_contig13516_251	7.949
												Hu et al. 2019	2B	Excalibur_c3120_1173	94.47													Cabral et al. 2018	wsnp_Ku_rep_c103074_89905152	1B.1	22.8718	Li et al. 2018	5B	IWB21380	161.1	Su et al. 2018	1B	RFL_Contig2971_282	9.482
												Hu et al. 2019	2B	BS00022515_51	94.814													Cabral et al. 2018	wPt-2762	1B.1	23.5475	Li et al. 2018	5B	IWB2049	164.1	Su et al. 2018	1B	wsnp_Ex_c26296_35541303	9.482
												Hu et al. 2019	2B	BobWhite_c7050_792	94.918													Cabral et al. 2018	wsnp_Ex_c50340_54659660	1B.1	23.5475	Li et al. 2018	5B	IWA22	166.5	Su et al. 2018	1B	wsnp_Ex_c13878_21738866	9.706
												Hu et al. 2019	2B	BS00022805_51	95.176													Cabral et al. 2018	wPt-2575	1B.1	23.5475	Li et al. 2018	5B	IWB67752	168.4	Su et al. 2018	1B	Kukri_c25512_53	9.706
												Hu et al. 2019	2B	Tdurum_contig28795_219	95.354													Cabral et al. 2018	wsnp_CAP11_c2307_1200406	1B.1	23.5475	Li et al. 2018	5B	IWB10756	171.2	Su et al. 2018	1B	Tdurum_contig8840_540	10.648
												Hu et al. 2019	2B	Excalibur_c1940_528	95.957													Cabral et al. 2018	gwm374.1	1B.1	23.5475	Li et al. 2018	5B	IWA4726	174.3	Su et al. 2018	1B	wsnp_RFL_Contig395_4387107	10.98
												Hu et al. 2019	2B	CAP8_c3234_216	95.974													Cabral et al. 2018	wsnp_Ku_c8592_14575931	1B.1	23.5475	Li et al. 2018	5B	IWB43424	176.4	Su et al. 2018	1B	BS00061472_51	12.441
												Hu et al. 2019	2B	wsnp_Ex_rep_c103064_88104690	96.242													Cabral et al. 2018	BS00029539_51	1B.1	23.5475	Li et al. 2018	5B	IWB35835	179.4	Su et al. 2018	1B	BS00023173_51	12.5
												Hu et al. 2019	2B	BS00030364_51	96.903													Cabral et al. 2018	BS00098794_51	1B.1	23.5475	Li et al. 2018	5B	IWB73046	182.4	Su et al. 2018	1B	BS00077831_51	13.984
												Hu et al. 2019	2B	BS00082967_51	97.24													Cabral et al. 2018	D_contig70818_696	1B.1	23.5475	Li et al. 2018	5B	IWB54992	186.4	Su et al. 2018	1B	tplb0034p10_1134	14.013
												Hu et al. 2019	2B	CAP11_c2941_210	97.506													Cabral et al. 2018	GENE-0815_86	1B.1	23.5475	Li et al. 2018	5B	IWB6672	189	Su et al. 2018	1B	wsnp_CAP7_c4778_2155754	14.312
												Hu et al. 2019	2B	Excalibur_c42146_266	97.876													Cabral et al. 2018	Tdurum_contig26201_77	1B.1	23.5475	Li et al. 2018	5B	IWA7374	194	Su et al. 2018	1B	BobWhite_c39901_338	14.582
												Hu et al. 2019	2B	BS00026432_51	98.435													Cabral et al. 2018	BS00003595	1B.1	23.5475	Li et al. 2018	5B	IWA3285	198.7	Su et al. 2018	1B	BS00075129_51	15.025
												Hu et al. 2019	2B	BS00076000_51	98.52													Cabral et al. 2018	BS00004903	1B.1	23.5475	Li et al. 2018	5D	IWB27086	0	Su et al. 2018	1B	RAC875_c49225_66	15.025
												Hu et al. 2019	2B	BS00067828_51	98.906													Cabral et al. 2018	gwm264	1B.1	23.5475	Li et al. 2018	5D	IWB38399	5.5	Su et al. 2018	1B	BS00071893_51	16.239
												Hu et al. 2019	2B	RAC875_c98387_130	99.355													Cabral et al. 2018	wmc818b	1B.1	23.5475	Li et al. 2018	5D	IWB38458	8.5	Su et al. 2018	1B	Tdurum_contig57153_1356	18.484
												Hu et al. 2019	2B	BS00022222_51	100.397													Cabral et al. 2018	BobWhite_c14032_277	1B.1	23.5475	Li et al. 2018	5D	IWB61072	12.1	Su et al. 2018	1B	GENE-0063_68	19.787
												Hu et al. 2019	2B	BS00060618_51	101.339													Cabral et al. 2018	BobWhite_c28295_256	1B.1	23.5475	Li et al. 2018	5D	IWB50247	12.7	Su et al. 2018	1B	BS00015519_51	19.819
												Hu et al. 2019	2B	wsnp_RFL_Contig2324_1803878	121.366													Cabral et al. 2018	BobWhite_c29613_126	1B.1	23.5475	Li et al. 2018	5D	IWB51329	14	Su et al. 2018	1B	Xwmc830.1	22.714
												Hu et al. 2019	2B	BS00065264_51	126.612													Cabral et al. 2018	BS00003595_51	1B.1	23.5475	Li et al. 2018	5D	IW B42896	15.6	Su et al. 2018	1B	Xwmc830.2	25.338
												Hu et al. 2019	2B	wsnp_Ex_c298_580660	0													Cabral et al. 2018	BS00029416_51	1B.1	23.5475	Li et al. 2018	5D	IWB40957	16.9	Su et al. 2018	1B	Tdurum_contig10475_87	26.324
												Hu et al. 2019	2B	BS00007384_51	5.581													Cabral et al. 2018	BS00037387_51	1B.1	23.5475	Li et al. 2018	5D	IWB37014	18.7	Su et al. 2018	1B	CAP12_c1085_283	28.909
												Hu et al. 2019	2B	BS00097147_51	6.169													Cabral et al. 2018	BS00064698_51	1B.1	23.5475	Li et al. 2018	5D	IWB41258	19.2	Su et al. 2018	1B	RAC875_c9082_267	30.9
												Hu et al. 2019	2B	Kukri_c17_1587	6.587													Cabral et al. 2018	BS00067961_51	1B.1	23.5475	Li et al. 2018	5D	IW B29996	21.6	Su et al. 2018	1B	Tdurum_contig4904_2923	31.98
												Hu et al. 2019	2B	Kukri_c94792_127	6.906													Cabral et al. 2018	BS00072113_51	1B.1	23.5475	Li et al. 2018	5D	IWB20904	23.5。	Su et al. 2018	1B	BS00028747_51	33.407
												Hu et al. 2019	2B	BS00022919_51	10.621													Cabral et al. 2018	BS00083340_51	1B.1	23.5475	Li et al. 2018	5D	IWB3745	26.7.	Su et al. 2018	1B	wsnp_Ex_c38849_46284348	37.664
												Hu et al. 2019	2B	BS00106606_51	12.863													Cabral et al. 2018	BS00089514_51	1B.1	23.5475	Li et al. 2018	5D	IWB63123	29.0.	Su et al. 2018	1B	Tdurum_contig61914_169	37.906
												Hu et al. 2019	2B	BobWhite_c2822_228	13.082													Cabral et al. 2018	BS00090770_51	1B.1	23.5475	Li et al. 2018	5D	IWB65830	30.8 '	Su et al. 2018	1B	BS00000010_51	40.634
												Hu et al. 2019	2B	wsnp_Ex_c31064_39902843	13.586													Cabral et al. 2018	BS00098484_51	1B.1	23.5475	Li et al. 2018	5D	IWB12546	31.4.	Su et al. 2018	1B	Xgwm259	48.315
												Hu et al. 2019	2B	Kukri_c52900_280	13.774													Cabral et al. 2018	BS00100287_51	1B.1	23.5475	Li et al. 2018	5D	IWB53180	32.1	Su et al. 2018	1B	BS00021877_51	51.285
												Hu et al. 2019	2B	BS00072839_51	15.062													Cabral et al. 2018	BS00105833_51	1B.1	23.5475	Li et al. 2018	5D	IW B44733	35.4	Su et al. 2018	1B	RAC875_c3001_1236	51.285
												Hu et al. 2019	2B	RFL_Contig1115_407	15.587													Cabral et al. 2018	BS00105846_51	1B.1	23.5475	Li et al. 2018	5D	IWA1681	37.3	Su et al. 2018	1B	Tdurum_contig84791_198	51.285
												Hu et al. 2019	2B	RFL_Contig1115_264	16.037													Cabral et al. 2018	BS00108058_51	1B.1	23.5475	Li et al. 2018	5D	IWB35168	41.9，	Su et al. 2018	1B	Tdurum_contig10354_170	51.621
												Hu et al. 2019	2B	BS00095525_51	21.292													Cabral et al. 2018	BS00110121_51	1B.1	23.5475	Li et al. 2018	5D	IWB45668	44.1	Su et al. 2018	1B	Tdurum_contig10354_270	52.443
												Hu et al. 2019	2D	Tdurum_contig62852_369	0													Cabral et al. 2018	CAP7_c3299_316	1B.1	23.5475	Li et al. 2018	5D	IWB63558	47.4	Su et al. 2018	1B	Kukri_c44604_203	52.644
												Hu et al. 2019	2D	Tdurum_contig32621_437	1.727													Cabral et al. 2018	CAP7_c3299_342	1B.1	23.5475	Li et al. 2018	5D	IWB34466	49.7，	Su et al. 2018	1B	RAC875_rep_c118984_119	52.72
												Hu et al. 2019	2D	BS00032252_51	2.236													Cabral et al. 2018	Ex_c21139_812	1B.1	23.5475	Li et al. 2018	5D	IWB1 1256	50.3 .	Su et al. 2018	1B	Tdurum_contig8669_131	52.72
												Hu et al. 2019	2D	wsnp_Ex_c25311_34578436	17.396													Cabral et al. 2018	Excalibur_c11666_134	1B.1	23.5475	Li et al. 2018	5D	IWB49479	50.4.	Su et al. 2018	1B	Tdurum_contig8669_296	52.72
												Hu et al. 2019	2D	Ku_c19185_1569	26.699													Cabral et al. 2018	Excalibur_c11666_996	1B.1	23.5475	Li et al. 2018	5D	IWB4101	52.7 .	Su et al. 2018	1B	BS00021667_51	59.152
												Hu et al. 2019	2D	BS00026262_51	31.446													Cabral et al. 2018	Excalibur_c11848_919	1B.1	23.5475	Li et al. 2018	5D	IWB22778	54.9.	Su et al. 2018	1B	Excalibur_c5888_169	59.875
												Hu et al. 2019	2D	wsnp_BE426620D_Ta_2_2	47.869													Cabral et al. 2018	Excalibur_c16851_232	1B.1	23.5475	Li et al. 2018	5D	IWB9347	56.3	Su et al. 2018	1B	Tdurum_contig13879_919	59.875
												Hu et al. 2019	2D	Tdurum_contig12879_201	48.293													Cabral et al. 2018	Excalibur_c16851_835	1B.1	23.5475	Li et al. 2018	5D	IWB1 100	58.2	Su et al. 2018	1B	Excalibur_c5888_641	59.907
												Hu et al. 2019	2D	BS00087054_51	48.348													Cabral et al. 2018	Excalibur_c23515_1177	1B.1	23.5475	Li et al. 2018	5D	IWB58404	59.4	Su et al. 2018	1B	Kukri_c59535_186	59.907
												Hu et al. 2019	2D	D_GDEEGVY02HEURY_74	52.25													Cabral et al. 2018	Excalibur_c37693_203	1B.1	23.5475	Li et al. 2018	5D	IWB29359	62.8	Su et al. 2018	1B	Kukri_c59535_393	59.907
												Hu et al. 2019	2D	wsnp_Ex_c5172_9167324	52.435													Cabral et al. 2018	Excalibur_c45969_370	1B.1	23.5475	Li et al. 2018	5D	IWB1672	64.6	Su et al. 2018	1B	Tdurum_contig45965_563	59.907
												Hu et al. 2019	2D	wsnp_BE490384D_Ta_1_1	52.456													Cabral et al. 2018	Excalibur_c46114_572	1B.1	23.5475	Li et al. 2018	5D	IWB4550	66.7	Su et al. 2018	1B	BS00021697_51	60.344
												Hu et al. 2019	2D	wsnp_Ex_c46666_52102968	52.657													Cabral et al. 2018	Excalibur_c46114_728	1B.1	23.5475	Li et al. 2018	5D	IWB46075	68.6	Su et al. 2018	1B	Tdurum_contig13879_429	61.125
												Hu et al. 2019	2D	Excalibur_c46666_142	52.661													Cabral et al. 2018	Excalibur_c54420_218	1B.1	23.5475	Li et al. 2018	5D	IWB6960	71.1	Su et al. 2018	1B	Excalibur_c55186_351	61.726
												Hu et al. 2019	2D	Kukri_c9274_1593	52.71													Cabral et al. 2018	Excalibur_c54439_276	1B.1	23.5475	Li et al. 2018	5D	IWB18910	74.6	Su et al. 2018	1B	RAC875_c37075_283	64.305
												Hu et al. 2019	2D	wsnp_Ex_c21593_30744815	53.533													Cabral et al. 2018	Excalibur_c55363_265	1B.1	23.5475	Li et al. 2018	5D	IWB14018	76.9	Su et al. 2018	1B	BS00027006_51	64.305
												Hu et al. 2019	2D	RAC875_rep_c120698_93	58.601													Cabral et al. 2018	Excalibur_c55959_651	1B.1	23.5475	Li et al. 2018	5D	IWB8663	80.8	Su et al. 2018	1B	wsnp_BE446672B_Ta_2_1	64.305
												Hu et al. 2019	2D	Kukri_c31121_1460	59.263													Cabral et al. 2018	Excalibur_c64890_61	1B.1	23.5475	Li et al. 2018	5D	IWB638	843	Su et al. 2018	1B	Kukri_c16608_761	64.316
												Hu et al. 2019	2D	Excalibur_c23239_961	62.973													Cabral et al. 2018	Excalibur_c81545_101	1B.1	23.5475	Li et al. 2018	5D	IWB7143	88.8	Su et al. 2018	1B	Excalibur_c25640_110	64.316
												Hu et al. 2019	2D	Kukri_c16161_231	79.579													Cabral et al. 2018	Excalibur_rep_c103414_186	1B.1	23.5475	Li et al. 2018	5D	IWB8961	92.1	Su et al. 2018	1B	RFL_Contig2550_679	64.316
												Hu et al. 2019	2D	Ex_c27573_778	82.315													Cabral et al. 2018	Excalibur_rep_c116725_184	1B.1	23.5475	Li et al. 2018	5D	IWB23975	94.9	Su et al. 2018	1B	Tdurum_contig51922_676	64.316
												Hu et al. 2019	2D	D_contig36004_217	82.334													Cabral et al. 2018	Excalibur_rep_c67198_530	1B.1	23.5475	Li et al. 2018	5D	IWB40752	98.4	Su et al. 2018	1B	Tdurum_contig9144_222	64.316
												Hu et al. 2019	2D	BS00091766_51	84.893													Cabral et al. 2018	GENE-0387_81	1B.1	23.5475	Li et al. 2018	5D	IWB49480	103	Su et al. 2018	1B	wsnp_Ex_c17990_26770800	64.316
												Hu et al. 2019	2D	IAAV6032	86.355													Cabral et al. 2018	GENE-3569_500	1B.1	23.5475	Li et al. 2018	5D	IWB43721	106.1	Su et al. 2018	1B	wsnp_Ex_c750_1474351	64.56
												Hu et al. 2019	2D	BS00015680_51	86.646													Cabral et al. 2018	IAAV3809	1B.1	23.5475	Li et al. 2018	5D	IWB2651	109.1	Su et al. 2018	1B	Ex_c6112_1248	64.56
												Hu et al. 2019	2D	Excalibur_rep_c67599_2154	86.922													Cabral et al. 2018	IAAV6001	1B.1	23.5475	Li et al. 2018	5D	IWB11022	113.2	Su et al. 2018	1B	RFL_Contig4538_657	64.56
												Hu et al. 2019	3A	Excalibur_c34889_526	0													Cabral et al. 2018	IAAV6899	1B.1	23.5475	Li et al. 2018	5D	IWB26811	118.7	Su et al. 2018	1B	wsnp_Ex_c750_1474300	64.56
												Hu et al. 2019	3A	Jagger_c6722_104	0.686													Cabral et al. 2018	IACX8860	1B.1	23.5475	Li et al. 2018	6A	IWB9330	0	Su et al. 2018	1B	RAC875_rep_c111730_97	64.593
												Hu et al. 2019	3A	BS00037189_51	0.895													Cabral et al. 2018	Jagger_c4032_73	1B.1	23.5475	Li et al. 2018	6A	IWB23313	7.2	Su et al. 2018	1B	Tdurum_contig1631_240	64.593
												Hu et al. 2019	3A	Kukri_c1568_889	0.896													Cabral et al. 2018	Jagger_c8952_170	1B.1	23.5475	Li et al. 2018	6A	IWB8078	14.4	Su et al. 2018	1B	Tdurum_contig60566_269	64.593
												Hu et al. 2019	3A	Kukri_rep_c89183_282	1.661													Cabral et al. 2018	Jagger_c8952_378	1B.1	23.5475	Li et al. 2018	6A	WB5895	22.2	Su et al. 2018	1B	wsnp_Ex_c750_1474184	64.593
												Hu et al. 2019	3A	wsnp_Ex_c10014_16476905	1.683													Cabral et al. 2018	Ku_c31363_2165	1B.1	23.5475	Li et al. 2018	6A	IWB34187	29.5	Su et al. 2018	1B	BS00067000_51	65.82
												Hu et al. 2019	3A	Excalibur_c1529_1369	1.707													Cabral et al. 2018	Kukri_c11756_1706	1B.1	23.5475	Li et al. 2018	6A	IWA7288	32.6	Su et al. 2018	1B	wsnp_Ku_c13952_22097856	67.04
												Hu et al. 2019	3A	wsnp_Ku_c3817_7009270	2.423													Cabral et al. 2018	Kukri_c1312_666	1B.1	23.5475	Li et al. 2018	6A	IWB551	38.6	Su et al. 2018	1B	Xwmc728	69.822
												Hu et al. 2019	3A	Ra_c73278_1234	2.469													Cabral et al. 2018	Kukri_c2464_592	1B.1	23.5475	Li et al. 2018	6A	IWA1311	42.3	Su et al. 2018	1B	Xbarc80	71.321
												Hu et al. 2019	3A	RAC875_c18570_893	2.712													Cabral et al. 2018	Kukri_c34536_259	1B.1	23.5475	Li et al. 2018	6A	IWB24278	45.4	Su et al. 2018	1B	RAC875_rep_c105597_205	72.438
												Hu et al. 2019	3A	Kukri_c2123_1254	3.008													Cabral et al. 2018	Kukri_c34536_373	1B.1	23.5475	Li et al. 2018	6A	IWB73400	48.3	Su et al. 2018	1B	RAC875_c9770_123	75.636
												Hu et al. 2019	3A	wsnp_Ex_rep_c67635_66292689	3.169													Cabral et al. 2018	Kukri_c38553_67	1B.1	23.5475	Li et al. 2018	6A	IWB14403	51.3	Su et al. 2018	1D	Xbarc149	0
												Hu et al. 2019	3A	wsnp_Ra_c2339_4506620	3.481													Cabral et al. 2018	Kukri_c38845_821	1B.1	23.5475	Li et al. 2018	6A	IWB59541	54.1	Su et al. 2018	1D	BS00000744_51	5.642
												Hu et al. 2019	3A	Excalibur_c10014_307	3.901													Cabral et al. 2018	Kukri_c54054_511	1B.1	23.5475	Li et al. 2018	6A	WA754	58.1	Su et al. 2018	1D	wsnp_Ex_c41048_47969948	6.001
												Hu et al. 2019	3A	Ex_c60559_120	4.217													Cabral et al. 2018	Kukri_c56333_138	1B.1	23.5475	Li et al. 2018	6A	IWB75254	58.5	Su et al. 2018	1D	wsnp_JD_c3091_4079762	6.001
												Hu et al. 2019	3A	wsnp_Ku_c10362_17156084	4.278													Cabral et al. 2018	Kukri_c56333_178	1B.1	23.5475	Li et al. 2018	6A	IWB35519	61.3	Su et al. 2018	1D	BobWhite_c359_1026	6.529
												Hu et al. 2019	3A	RAC875_c787_431	6.631													Cabral et al. 2018	Kukri_c76307_259	1B.1	23.5475	Li et al. 2018	6A	IWB8442	64.3	Su et al. 2018	1D	Kukri_c26168_713	8.532
												Hu et al. 2019	3A	Ku_c17560_91	7.023													Cabral et al. 2018	Kukri_c79135_136	1B.1	23.5475	Li et al. 2018	6A	IWB39176	66	Su et al. 2018	1D	D_GDS7LZN02IXNP1_255	8.532
												Hu et al. 2019	3A	BobWhite_c2570_781	8.856													Cabral et al. 2018	Kukri_c8592_935	1B.1	23.5475	Li et al. 2018	6A	IWA8348	68.5	Su et al. 2018	1D	Kukri_c7822_144	8.532
												Hu et al. 2019	3A	RAC875_rep_c77067_347	9.136													Cabral et al. 2018	Kukri_c8602_267	1B.1	23.5475	Li et al. 2018	6A	IWA428	71.4	Su et al. 2018	1D	RAC875_c10925_1887	8.532
												Hu et al. 2019	3A	BobWhite_c2570_682	10.013													Cabral et al. 2018	Kukri_c8602_730	1B.1	23.5475	Li et al. 2018	6A	WB35169	74.3	Su et al. 2018	1D	wsnp_Ku_c7822_13408189	8.532
												Hu et al. 2019	3A	RAC875_c82493_67	11.604													Cabral et al. 2018	Kukri_rep_c106603_618	1B.1	23.5475	Li et al. 2018	6A	IWB33782	75.3	Su et al. 2018	1D	Kukri_c54820_382	14.57
												Hu et al. 2019	3A	BS00055211_51	12.621													Cabral et al. 2018	Kukri_rep_c68693_86	1B.1	23.5475	Li et al. 2018	6A	IWB8079	75.5	Su et al. 2018	1D	Kukri_c37718_187	21.236
												Hu et al. 2019	3A	Ra_c6118_350	16.887													Cabral et al. 2018	Ra_c69552_1419	1B.1	23.5475	Li et al. 2018	6A	IWB45914	75.9	Su et al. 2018	1D	Excalibur_rep_c105429_654	24.461
												Hu et al. 2019	3A	Ra_c6118_450	17.124													Cabral et al. 2018	RAC875_c102411_201	1B.1	23.5475	Li et al. 2018	6A	IWB75285	78.4	Su et al. 2018	1D	wsnp_CAP11_c8597_3709328	37.341
												Hu et al. 2019	3A	IACX2831	20.914													Cabral et al. 2018	RAC875_c11201_111	1B.1	23.5475	Li et al. 2018	6A	WB7513	81.1	Su et al. 2018	1D	BS00049071_51	62.451
												Hu et al. 2019	3A	wsnp_CAP11_rep_c4157_1965583	20.925													Cabral et al. 2018	RAC875_c113582_346	1B.1	23.5475	Li et al. 2018	6A	IWB21409	84.1	Su et al. 2018	1D	BS00049072_51	62.451
												Hu et al. 2019	3A	Kukri_c13830_601	21.869													Cabral et al. 2018	RAC875_c15942_571	1B.1	23.5475	Li et al. 2018	6A	IWB45292	87.6	Su et al. 2018	1D	BS00070085_51	62.451
												Hu et al. 2019	3A	Excalibur_c4548_2697	26.293													Cabral et al. 2018	RAC875_c16352_326	1B.1	23.5475	Li et al. 2018	6A	WB34973	90.8	Su et al. 2018	1D	IAAV3422	62.451
												Hu et al. 2019	3A	wsnp_Ex_c33765_42199371	0													Cabral et al. 2018	RAC875_c21801_1262	1B.1	23.5475	Li et al. 2018	6A	IWB48102	92.1	Su et al. 2018	1D	Excalibur_c16452_624	63.157
												Hu et al. 2019	3A	BS00036492_51	7.119													Cabral et al. 2018	RAC875_c25125_210	1B.1	23.5475	Li et al. 2018	6A	IWA3491	94.7	Su et al. 2018	1D	BS00046672_51	63.894
												Hu et al. 2019	3A	BS00022129_51	10.214													Cabral et al. 2018	RAC875_c5243_206	1B.1	23.5475	Li et al. 2018	6A	IWB2006	99.1	Su et al. 2018	1D	Kukri_c19622_131	64.329
												Hu et al. 2019	3A	wsnp_Ku_c44089_51445136	10.629													Cabral et al. 2018	RAC875_c5243_236	1B.1	23.5475	Li et al. 2018	6A	IWB11639	102.1	Su et al. 2018	1D	RAC875_c9594_1289	64.587
												Hu et al. 2019	3A	IAAV6974	11.122													Cabral et al. 2018	RAC875_c5243_479	1B.1	23.5475	Li et al. 2018	6A	IWB27608	106.7	Su et al. 2018	1D	Xgwm131	68.301
												Hu et al. 2019	3A	wsnp_Ex_rep_c67727_66398596	11.127													Cabral et al. 2018	RAC875_c63624_1002	1B.1	23.5475	Li et al. 2018	6A	IWB64256	109.2	Su et al. 2018	1D	BS00031658_51	68.789
												Hu et al. 2019	3A	Kukri_rep_c114028_94	11.519													Cabral et al. 2018	RAC875_c63624_1040	1B.1	23.5475	Li et al. 2018	6A	IWB64255	111.6	Su et al. 2018	1D	IACX8280	70.613
												Hu et al. 2019	3A	Kukri_c17313_667	11.74													Cabral et al. 2018	RAC875_c64371_209	1B.1	23.5475	Li et al. 2018	6A	1WB1815	111.8	Su et al. 2018	1D	Xgwm458	71.646
												Hu et al. 2019	3A	BS00070464_51	14.954													Cabral et al. 2018	RAC875_c75971_295	1B.1	23.5475	Li et al. 2018	6A	IWB55898	114.1	Su et al. 2018	1D	Xwmc216.2	73.717
												Hu et al. 2019	3A	Kukri_c36418_392	16.344													Cabral et al. 2018	RAC875_c75971_349	1B.1	23.5475	Li et al. 2018	6A	IWB53748	115.6	Su et al. 2018	1D	Kukri_c18350_151	74.795
												Hu et al. 2019	3A	wsnp_CAP11_rep_c8750_3780311	17.018													Cabral et al. 2018	RAC875_c7926_467	1B.1	23.5475	Li et al. 2018	6A	1WB11 125	116	Su et al. 2018	1D	Ku_c16809_845	75.466
												Hu et al. 2019	3A	GENE-1742_70	18.42													Cabral et al. 2018	RAC875_rep_c109901_811	1B.1	23.5475	Li et al. 2018	6A	IWB58370	116.9	Su et al. 2018	1D	BobWhite_c1488_299	75.879
												Hu et al. 2019	3A	Kukri_c5459_334	21.035													Cabral et al. 2018	RAC875_rep_c69640_88	1B.1	23.5475	Li et al. 2018	6A	IWB69606	118.8	Su et al. 2018	1D	TA003135-0494	75.879
												Hu et al. 2019	3A	Excalibur_c9653_605	22.655													Cabral et al. 2018	RAC875_rep_c70613_78	1B.1	23.5475	Li et al. 2018	6A	IWB59178	121.1	Su et al. 2018	1D	wsnp_Ex_c3450_6323939	78.399
												Hu et al. 2019	3A	BobWhite_c18408_199	23.363													Cabral et al. 2018	RFL_Contig1118_65	1B.1	23.5475	Li et al. 2018	6A	1WB60699	124.6	Su et al. 2018	1D	wsnp_Ex_c10959_17801482	79.716
												Hu et al. 2019	3A	Ra_c72106_227	23.977													Cabral et al. 2018	RFL_Contig293_498	1B.1	23.5475	Li et al. 2018	6A	1WA6182	127.2	Su et al. 2018	1D	D_contig14507_369	80.736
												Hu et al. 2019	3A	IAAV6317	24.821													Cabral et al. 2018	RFL_Contig4104_670	1B.1	23.5475	Li et al. 2018	6A	IWB36445	130.3	Su et al. 2018	1D	IAAV4656	81.186
												Hu et al. 2019	3A	RAC875_c842_1516	25.251													Cabral et al. 2018	RFL_Contig5906_387	1B.1	23.5475	Li et al. 2018	6A	IWB7372	145	Su et al. 2018	1D	Kukri_c20062_389	83.54
												Hu et al. 2019	3A	BS00070511_51	25.506													Cabral et al. 2018	RFL_Contig5906_985	1B.1	23.5475	Li et al. 2018	6B	IWB10830	0	Su et al. 2018	1D	Xcfd61	83.673
												Hu et al. 2019	3A	Excalibur_rep_c107798_68	27.461													Cabral et al. 2018	TA005766-0499	1B.1	23.5475	Li et al. 2018	6B	IWB23070	6.1	Su et al. 2018	1D	Xbarc240	87.034
												Hu et al. 2019	3A	wsnp_Ku_c44716_51926415	28.286													Cabral et al. 2018	Tdurum_contig13811_741	1B.1	23.5475	Li et al. 2018	6B	IWB35378	12.2	Su et al. 2018	1D	D_contig32652_163	87.776
												Hu et al. 2019	3A	BobWhite_rep_c64211_305	32.546													Cabral et al. 2018	Tdurum_contig14404_319	1B.1	23.5475	Li et al. 2018	6B	IWB31078	18	Su et al. 2018	1D	Xcfd65	88.229
												Hu et al. 2019	3A	Ex_c24992_1659	32.551													Cabral et al. 2018	Tdurum_contig29247_404	1B.1	23.5475	Li et al. 2018	6B	IWB21053	24.6	Su et al. 2018	1D	BS00079095_51	89.535
												Hu et al. 2019	3A	Tdurum_contig64606_1104	33.933													Cabral et al. 2018	Tdurum_contig44219_318	1B.1	23.5475	Li et al. 2018	6B	IWA3228	27	Su et al. 2018	1D	Xwmc419	90.12
												Hu et al. 2019	3A	wsnp_Ex_c26887_36107413	34.395													Cabral et al. 2018	Tdurum_contig44809_1626	1B.1	23.5475	Li et al. 2018	6B	IWB50274	30.1	Su et al. 2018	1D	Excalibur_c19237_895	90.39
												Hu et al. 2019	3A	BS00080879_51	36.02													Cabral et al. 2018	Tdurum_contig68637_256	1B.1	23.5475	Li et al. 2018	6B	IWB10870	34	Su et al. 2018	1D	wsnp_Ex_c3831_6966926	91.504
												Hu et al. 2019	3A	IAAV8483	36.395													Cabral et al. 2018	Tdurum_contig76266_134	1B.1	23.5475	Li et al. 2018	6B	IW B8399	36.4	Su et al. 2018	1D	Xwmc216.1	91.791
												Hu et al. 2019	3A	Ex_c35861_1382	39.832													Cabral et al. 2018	Tdurum_contig76266_221	1B.1	23.5475	Li et al. 2018	6B	IWB59904	39.7	Su et al. 2018	1D	BobWhite_c10977_834	92.516
												Hu et al. 2019	3A	Tdurum_contig48522_295	42.985													Cabral et al. 2018	Tdurum_contig95782_945	1B.1	23.5475	Li et al. 2018	6B	IWB10754	42.1	Su et al. 2018	1D	BS00004282_51	92.516
												Hu et al. 2019	3A	Tdurum_contig9912_451	43.834													Cabral et al. 2018	tplb0036l23_243	1B.1	23.5475	Li et al. 2018	6B	IWB26716	45.3	Su et al. 2018	1D	BS00014671_51	92.516
												Hu et al. 2019	3A	Excalibur_c18747_1292	45.175													Cabral et al. 2018	tplb0036l23_696	1B.1	23.5475	Li et al. 2018	6B	IWB190	48	Su et al. 2018	1D	IAAV2840	92.516
												Hu et al. 2019	3A	Kukri_rep_c69970_717	45.78													Cabral et al. 2018	wsnp_Ex_c14361_22341570	1B.1	23.5475	Li et al. 2018	6B	IWB51136	51.2	Su et al. 2018	1D	wsnp_Ex_c1318_2520706	92.516
												Hu et al. 2019	3A	CAP12_c5387_372	46.301													Cabral et al. 2018	wsnp_Ex_c1493_2860766	1B.1	23.5475	Li et al. 2018	6B	IWB43115	54.2	Su et al. 2018	1D	wsnp_Ex_c57601_59245380	92.516
												Hu et al. 2019	3A	wsnp_Ex_c8517_14315660	46.719													Cabral et al. 2018	wsnp_Ex_c7705_13139890	1B.1	23.5475	Li et al. 2018	6B	IWA3797	57.7	Su et al. 2018	1D	wsnp_Ex_c57601_59245549	92.516
												Hu et al. 2019	3A	Excalibur_c39508_88	47.871													Cabral et al. 2018	wsnp_Ex_rep_c66774_65133356	1B.1	23.5475	Li et al. 2018	6B	IWB1000	59.4	Su et al. 2018	1D	wsnp_Ex_c6920_11929748	92.516
												Hu et al. 2019	3A	wsnp_BQ167580A_Ta_1_1	47.948													Cabral et al. 2018	wsnp_Ex_rep_c67198_65702998	1B.1	23.5475	Li et al. 2018	6B	IW B66344	59.5	Su et al. 2018	1D	wsnp_Ku_c7266_12551048	92.56
												Hu et al. 2019	3A	GENE-1981_131	48.381													Cabral et al. 2018	wsnp_Ex_rep_c67619_66272209	1B.1	23.5475	Li et al. 2018	6B	IWB12201	62.3	Su et al. 2018	1D	D_contig06122_208	92.56
												Hu et al. 2019	3A	wsnp_Ex_rep_c67588_66227926	48.404													Cabral et al. 2018	wsnp_Ku_c1615_3178276	1B.1	23.5475	Li et al. 2018	6B	IWB71763	65.4	Su et al. 2018	1D	D_GBF1XID01DNWRS_378	92.56
												Hu et al. 2019	3A	Excalibur_c17655_467	48.431													Cabral et al. 2018	wsnp_Ku_c17177_26216230	1B.1	23.5475	Li et al. 2018	6B	IWA3735	66.5	Su et al. 2018	1D	Ku_c5560_2665	92.56
												Hu et al. 2019	3A	D_GBB4FNX02FX302_98	57.747													Cabral et al. 2018	wsnp_Ku_c28164_38103270	1B.1	23.5475	Li et al. 2018	6B	IWB15024	69.8	Su et al. 2018	1D	RAC875_c3604_1527	92.56
												Hu et al. 2019	3A	BobWhite_c21397_148	58.114													Cabral et al. 2018	wsnp_Ku_c3097_5801027	1B.1	23.5475	Li et al. 2018	6B	IWB33704	71.6	Su et al. 2018	1D	RAC875_c43831_91	92.56
												Hu et al. 2019	3A	Kukri_c14971_367	58.815													Cabral et al. 2018	wsnp_Ra_c5485_9703900	1B.1	23.5475	Li et al. 2018	6B	IWB45409	73.4	Su et al. 2018	1D	TA004358-0724	92.56
												Hu et al. 2019	3A	Ex_c24554_1583	59.632													Cabral et al. 2018	BS00068182_51	1B.1	24.0939	Li et al. 2018	6B	1WB14228	75.4	Su et al. 2018	1D	wsnp_Ex_c25974_35235456	92.56
												Hu et al. 2019	3A	wsnp_BQ160970A_Ta_2_7	60.078													Cabral et al. 2018	Excalibur_c3270_1566	1B.1	24.0939	Li et al. 2018	6B	IWB47763	78	Su et al. 2018	1D	wsnp_Ex_c6920_11928994	92.56
												Hu et al. 2019	3A	wsnp_Ex_rep_c66357_64540428	60.18													Cabral et al. 2018	Kukri_c23662_414	1B.1	24.0939	Li et al. 2018	6B	IWB58636	79	Su et al. 2018	1D	wsnp_Ku_c2624_4986980	92.56
												Hu et al. 2019	3A	Excalibur_c2340_1190	61.66													Cabral et al. 2018	wPt-2725	1B.1	24.0939	Li et al. 2018	6B	IW 8B53548	82.8	Su et al. 2018	1D	wsnp_Ku_c5560_9851459	92.56
												Hu et al. 2019	3A	BS00060029_51	61.966													Cabral et al. 2018	wPt-0974	1B.1	24.0939	Li et al. 2018	6B	IWB9021	83.8	Su et al. 2018	1D	wsnp_Ku_c5560_9853214	92.56
												Hu et al. 2019	3A	Tdurum_contig68305_796	62.645													Cabral et al. 2018	wPt-1911	1B.1	24.0939	Li et al. 2018	6B	IWB41570	86.6	Su et al. 2018	1D	wsnp_Ex_c3831_6965890	93.029
												Hu et al. 2019	3A	Excalibur_rep_c110501_525	63.872													Cabral et al. 2018	Tdurum_contig44861_1253	1B.1	24.0939	Li et al. 2018	6B	IWB15703	89.1	Su et al. 2018	1D	Kukri_c12758_2101	93.31
												Hu et al. 2019	3A	BS00067228_51	0													Cabral et al. 2018	Tdurum_contig44861_237	1B.1	24.0939	Li et al. 2018	6B	IWB10268	93.4	Su et al. 2018	1D	Excalibur_c8188_243	93.447
												Hu et al. 2019	3A	BS00065734_51	7.001													Cabral et al. 2018	BS00067012_51	1B.1	24.0939	Li et al. 2018	6B	IWB10649	94	Su et al. 2018	1D	Kukri_c6051_640	93.809
												Hu et al. 2019	3A	Tdurum_contig42495_389	10.011													Cabral et al. 2018	Excalibur_c24303_268	1B.1	24.0939	Li et al. 2018	6B	1WB2746	94.3	Su et al. 2018	1D	RAC875_c30569_210	93.883
												Hu et al. 2019	3A	BobWhite_c3356_442	12.082													Cabral et al. 2018	Excalibur_c6726_357	1B.1	24.0939	Li et al. 2018	6B	IWB36722	96.9	Su et al. 2018	1D	RAC875_c49612_102	93.992
												Hu et al. 2019	3A	CAP11_c254_112	35.602													Cabral et al. 2018	GENE-0211_446	1B.1	24.0939	Li et al. 2018	6B	IWB71540	98.6	Su et al. 2018	1D	Ra_c21676_178	93.992
												Hu et al. 2019	3A	RAC875_c24982_202	37.084													Cabral et al. 2018	GENE-1756_115	1B.1	24.0939	Li et al. 2018	6B	IWB5593	99.5	Su et al. 2018	1D	wsnp_Ex_c15396_23659859	93.992
												Hu et al. 2019	3A	wsnp_BE426418A_Ta_2_2	38.667													Cabral et al. 2018	GENE-4668_244	1B.1	24.0939	Li et al. 2018	6B	1WB5488	99.6	Su et al. 2018	1D	BS00082503_51	94.302
												Hu et al. 2019	3A	Excalibur_c361_1321	40.723													Cabral et al. 2018	IAAV426	1B.1	24.0939	Li et al. 2018	6B	IWB41515	101	Su et al. 2018	1D	BS00022768_51	94.302
												Hu et al. 2019	3A	CAP7_rep_c12537_81	41.947													Cabral et al. 2018	RAC875_c51663_87	1B.1	24.0939	Li et al. 2018	6B	IWB52688	104.3	Su et al. 2018	1D	IAAV4866	94.441
												Hu et al. 2019	3A	wsnp_Ex_c11229_18163892	60.134													Cabral et al. 2018	RAC875_c140_650	1B.1	24.0939	Li et al. 2018	6B	IWB24543	104.6	Su et al. 2018	1D	Excalibur_c48317_242	94.524
												Hu et al. 2019	3A	wsnp_Ku_c5359_9530161	60.75													Cabral et al. 2018	Tdurum_contig31564_364	1B.1	24.0939	Li et al. 2018	6B	1WB74865	104.9	Su et al. 2018	1D	RAC875_c87321_108	95.115
												Hu et al. 2019	3B	BS00062677_51	0													Cabral et al. 2018	Ku_c8505_1424	1B.1	35.1922	Li et al. 2018	6B	IWB73837	105.7	Su et al. 2018	1D	BS00075001_51	95.115
												Hu et al. 2019	3B	BS00100045_51	1.234													Cabral et al. 2018	BS00017243	1B.1	37.1413	Li et al. 2018	6B	IWB14356	108.9	Su et al. 2018	1D	GENE-0511_484	95.115
												Hu et al. 2019	3B	RAC875_rep_c118229_56	1.237													Cabral et al. 2018	Tdurum_contig55639_241	1B.1	37.1413	Li et al. 2018	6B	IWB43571	111.9	Su et al. 2018	1D	wsnp_Ex_c18665_27541568	95.115
												Hu et al. 2019	3B	Ku_c519_281	2.164													Cabral et al. 2018	BobWhite_c26045_230	1B.1	37.1413	Li et al. 2018	6B	1WB53616	114.1	Su et al. 2018	1D	wsnp_Ex_rep_c66423_64641680	95.115
												Hu et al. 2019	3B	wsnp_Ex_c22154_31342077	3.108													Cabral et al. 2018	BS00065737_51	1B.1	37.1413	Li et al. 2018	6B	IWB23	117	Su et al. 2018	1D	BobWhite_c4236_410	96.172
												Hu et al. 2019	3B	Excalibur_rep_c104237_78	3.616													Cabral et al. 2018	BS00067003_51	1B.1	37.1413	Li et al. 2018	6B	IWB52926	120.7	Su et al. 2018	1D	RAC875_c4135_1028	97.255
												Hu et al. 2019	3B	Kukri_rep_c96809_457	4.397													Cabral et al. 2018	BS00067567_51	1B.1	37.1413	Li et al. 2018	6D	IWB39044	0	Su et al. 2018	1D	BS00063907_51	104.417
												Hu et al. 2019	3B	IACX6214	11.462													Cabral et al. 2018	BS00106306_51	1B.1	37.1413	Li et al. 2018	6D	IWB25142	3.3	Su et al. 2018	1D	BS00003816_51	105.257
												Hu et al. 2019	3B	BS00097558_51	11.574													Cabral et al. 2018	GENE-0427_115	1B.1	37.1413	Li et al. 2018	6D	IWB61671	6.1	Su et al. 2018	1D	BS00040568_51	105.257
												Hu et al. 2019	3B	Tdurum_contig57914_1156	12.736													Cabral et al. 2018	GENE-0427_442	1B.1	37.1413	Li et al. 2018	6D	IWA5275	8.8	Su et al. 2018	1D	wsnp_Ex_c6378_11087794	106.157
												Hu et al. 2019	3B	BS00026471_51	13.418													Cabral et al. 2018	IAAV2838	1B.1	37.1413	Li et al. 2018	6D	IWB6072	11.2	Su et al. 2018	1D	wsnp_Ex_c35886_43950574	106.986
												Hu et al. 2019	3B	CAP11_c5660_100	13.539													Cabral et al. 2018	IACX16577	1B.1	37.1413	Li et al. 2018	6D	IWA2478	14.4	Su et al. 2018	1D	wsnp_Ex_c35886_43949442	107.273
												Hu et al. 2019	3B	Tdurum_contig22897_107	16.834													Cabral et al. 2018	Kukri_c47342_73	1B.1	37.1413	Li et al. 2018	6D	IWB45573	18.5	Su et al. 2018	1D	wsnp_Ex_c35886_43950102	107.769
												Hu et al. 2019	3B	Tdurum_contig11684_144	18.272													Cabral et al. 2018	Kukri_rep_c100936_449	1B.1	37.1413	Li et al. 2018	6D	IWB18969	24	Su et al. 2018	1D	BS00093390_51	108.936
												Hu et al. 2019	3B	BS00070455_51	21.739													Cabral et al. 2018	RAC875_c49924_324	1B.1	39.3285	Li et al. 2018	6D	IWB30444	27.3	Su et al. 2018	1D	RAC875_c51177_261	112.166
												Hu et al. 2019	3B	BS00056258_51	23.432													Cabral et al. 2018	wmc619	1B.1	45.6917	Li et al. 2018	6D	IWB12899	30.2	Su et al. 2018	1D	BS00064881_51	112.751
												Hu et al. 2019	3B	RFL_Contig1456_842	23.826													Cabral et al. 2018	gwm413	1B.1	45.6917	Li et al. 2018	6D	IWB67144	33.6	Su et al. 2018	1D	Xcfd63	117.254
												Hu et al. 2019	3B	wsnp_JD_rep_c63739_40660910	25.685													Cabral et al. 2018	gpw3067c	1B.1	55.0295	Li et al. 2018	6D	IWA1643	36.5	Su et al. 2018	1D	Excalibur_c50856_63	120.35
												Hu et al. 2019	3B	wsnp_CAP11_c1214_700174	25.979													Cabral et al. 2018	Kukri_rep_c106406_265	1B.1	57.6293	Li et al. 2018	6D	IWB35255	38.6	Su et al. 2018	1D	GENE-0129_110	123.807
												Hu et al. 2019	3B	BS00087825_51	27.037													Cabral et al. 2018	BobWhite_c8218_162	1B.1	57.6293	Li et al. 2018	6D	IWB57798	40.3	Su et al. 2018	1D	D_contig12192_450	129.904
												Hu et al. 2019	3B	BS00022242_51	29.762													Cabral et al. 2018	BS00010352_51	1B.1	57.6293	Li et al. 2018	6D	IWB39422	42.1	Su et al. 2018	1D	BS00094562_51	130.922
												Hu et al. 2019	3B	wsnp_Ex_c2820_5215394	33.254													Cabral et al. 2018	wmc611a	1B.1	57.6293	Li et al. 2018	6D	IWB65199	43.8	Su et al. 2018	1D	IACX8359	131.102
												Hu et al. 2019	3B	IAAV2040	33.468													Cabral et al. 2018	wsnp_Ra_c4296_7819139	1B.1	57.6293	Li et al. 2018	6D	IWB42358	45.3	Su et al. 2018	1D	Tdurum_contig8840_575	132.485
												Hu et al. 2019	3B	Kukri_c46948_558	34.395													Cabral et al. 2018	barc137	1B.1	57.6293	Li et al. 2018	6D	IWB50824	46.6	Su et al. 2018	1D	CAP11_c2892_176	136.461
												Hu et al. 2019	3B	Kukri_rep_c70103_146	34.975													Cabral et al. 2018	BS00009952	1B.1	57.6293	Li et al. 2018	6D	IWB26736	48.6	Su et al. 2018	1D	BobWhite_c44460_821	139.89
												Hu et al. 2019	3B	wsnp_Ex_c447_876091	36.922													Cabral et al. 2018	wmc626	1B.1	57.6293	Li et al. 2018	6D	IWB35491	51.4	Su et al. 2018	1D	BS00045568_51	141.354
												Hu et al. 2019	3B	BS00011728_51	37.737													Cabral et al. 2018	BobWhite_c3771_441	1B.1	57.6293	Li et al. 2018	6D	IWA619	52.2	Su et al. 2018	1D	BS00021876_51	146.696
												Hu et al. 2019	3B	Tdurum_contig67690_183	38.312													Cabral et al. 2018	BS00044869_51	1B.1	57.6293	Li et al. 2018	6D	IWB6782	54.9	Su et al. 2018	2A	IACX8391	0
												Hu et al. 2019	3B	RAC875_c1069_115	39.076													Cabral et al. 2018	BS00066444_51	1B.1	57.6293	Li et al. 2018	6D	IWB13131	57	Su et al. 2018	2A	GENE-0137_1660	9.181
												Hu et al. 2019	3B	wsnp_Ex_c4063_7344449	39.166													Cabral et al. 2018	Excalibur_c27675_1815	1B.1	57.6293	Li et al. 2018	6D	IWB68272	63.7	Su et al. 2018	2A	BobWhite_c19433_329	9.181
												Hu et al. 2019	3B	wsnp_Ku_c33335_42844680	39.257													Cabral et al. 2018	Excalibur_c27675_912	1B.1	57.6293	Li et al. 2018	6D	IWB60356	65.1	Su et al. 2018	2A	Excalibur_c29937_261	9.181
												Hu et al. 2019	3B	BS00060247_51	39.9													Cabral et al. 2018	Excalibur_c32608_500	1B.1	57.6293	Li et al. 2018	6D	IWB36701	67.7	Su et al. 2018	2A	BobWhite_c24495_282	9.395
												Hu et al. 2019	3B	BS00075108_51	40.203													Cabral et al. 2018	Excalibur_c51643_145	1B.1	57.6293	Li et al. 2018	6D	IWB34463	70.4	Su et al. 2018	2A	CAP7_c3132_150	9.395
												Hu et al. 2019	3B	wsnp_JD_c30422_23944042	40.712													Cabral et al. 2018	Excalibur_c6497_535	1B.1	57.6293	Li et al. 2018	6D	IWB65394	71	Su et al. 2018	2A	Kukri_c33779_1069	9.815
												Hu et al. 2019	3B	BS00109808_51	41.379													Cabral et al. 2018	Excalibur_rep_c106174_390	1B.1	57.6293	Li et al. 2018	6D	IWB6569	74.6	Su et al. 2018	2A	RAC875_c20273_984	9.815
												Hu et al. 2019	3B	BS00021943_51	41.839													Cabral et al. 2018	IAAV1364	1B.1	57.6293	Li et al. 2018	6D	IWB2727	78.3	Su et al. 2018	2A	Kukri_c27040_309	11.037
												Hu et al. 2019	3B	Excalibur_c63730_660	41.982													Cabral et al. 2018	Ku_c16382_213	1B.1	57.6293	Li et al. 2018	6D	IWB2386	80.8	Su et al. 2018	2A	BobWhite_c19433_185	12.576
												Hu et al. 2019	3B	BS00072151_51	42.336													Cabral et al. 2018	Kukri_c147_1620	1B.1	57.6293	Li et al. 2018	6D	IWB3696	83	Su et al. 2018	2A	wsnp_Ex_c19556_28530231	15.594
												Hu et al. 2019	3B	wsnp_Ex_c4769_8510104	43.467													Cabral et al. 2018	Kukri_rep_c111517_289	1B.1	57.6293	Li et al. 2018	6D	IWB49496	84.5	Su et al. 2018	2A	Ra_c2798_261	18.247
												Hu et al. 2019	3B	BS00039734_51	43.704													Cabral et al. 2018	RAC875_c21274_235	1B.1	57.6293	Li et al. 2018	6D	IWB4005	86.2	Su et al. 2018	2A	Tdurum_contig11803_850	18.699
												Hu et al. 2019	3B	IACX9430	44.173													Cabral et al. 2018	RAC875_c25006_490	1B.1	57.6293	Li et al. 2018	6D	IWB11446	88.2	Su et al. 2018	2A	Tdurum_contig92425_1673	19.224
												Hu et al. 2019	3B	BobWhite_rep_c50457_813	44.306													Cabral et al. 2018	RAC875_c3457_303	1B.1	57.6293	Li et al. 2018	6D	IWB48840	90	Su et al. 2018	2A	wsnp_Ex_c2033_3814035	19.787
												Hu et al. 2019	3B	BS00045329_51	44.365													Cabral et al. 2018	RAC875_c3457_65	1B.1	57.6293	Li et al. 2018	6D	IWB16727	92.3	Su et al. 2018	2A	BobWhite_c26374_339	19.787
												Hu et al. 2019	3B	Excalibur_c62737_131	44.919													Cabral et al. 2018	RAC875_c8662_140	1B.1	57.6293	Li et al. 2018	6D	IWB8641	94.5	Su et al. 2018	2A	IAAV2585	19.787
												Hu et al. 2019	3B	BS00030581_51	45.116													Cabral et al. 2018	RAC875_c8662_547	1B.1	57.6293	Li et al. 2018	7A	IWB40875	0	Su et al. 2018	2A	Ku_c269_2643	19.787
												Hu et al. 2019	3B	RFL_Contig5682_86	45.655													Cabral et al. 2018	RAC875_c8662_762	1B.1	57.6293	Li et al. 2018	7A	IWB75057	8.3	Su et al. 2018	2A	Kukri_c46426_338	19.787
												Hu et al. 2019	3B	BS00052423_51	45.888													Cabral et al. 2018	RAC875_c8662_917	1B.1	57.6293	Li et al. 2018	7A	IWB24479	16.7	Su et al. 2018	2A	Tdurum_contig11803_306	19.787
												Hu et al. 2019	3B	BS00073305_51	46.164													Cabral et al. 2018	RAC875_rep_c70022_1648	1B.1	57.6293	Li et al. 2018	7A	IWB2616	28.1	Su et al. 2018	2A	Tdurum_contig11803_515	19.787
												Hu et al. 2019	3B	BS00091867_51	46.462													Cabral et al. 2018	RAC875_rep_c72356_51	1B.1	57.6293	Li et al. 2018	7A	IWB7445	32	Su et al. 2018	2A	wsnp_Ex_c19556_28530243	19.787
												Hu et al. 2019	3B	Kukri_rep_c108929_91	46.67													Cabral et al. 2018	TA004324-0491	1B.1	57.6293	Li et al. 2018	7A	IWB18869	36.3	Su et al. 2018	2A	RAC875_c1643_1548	21.696
												Hu et al. 2019	3B	wsnp_Ex_c2314_4333242	47.107													Cabral et al. 2018	Tdurum_contig29769_202	1B.1	57.6293	Li et al. 2018	7A	IWB23215	39.8	Su et al. 2018	2A	Kukri_c24262_918	23.669
												Hu et al. 2019	3B	BS00022051_51	47.448													Cabral et al. 2018	wsnp_BE637864B_Ta_1_1	1B.1	57.6293	Li et al. 2018	7A	IWB1483	42.4	Su et al. 2018	2A	Tdurum_contig11803_475	23.844
												Hu et al. 2019	3B	RAC875_c96638_103	47.768													Cabral et al. 2018	wsnp_Ku_c230_460618	1B.1	57.6293	Li et al. 2018	7A	IWB48636	46.1	Su et al. 2018	2A	BS00075524_51	25.466
												Hu et al. 2019	3B	wsnp_Ex_c12887_20427158	49.033													Cabral et al. 2018	wsnp_Ku_rep_c71900_71624324	1B.1	57.6293	Li et al. 2018	7A	IWB7431	49.5	Su et al. 2018	2A	wsnp_CAP12_c901_472535	28.636
												Hu et al. 2019	3B	RAC875_c50661_279	49.036													Cabral et al. 2018	wsnp_Ra_c8506_14401408	1B.1	57.6293	Li et al. 2018	7A	IWB70603	50.7	Su et al. 2018	2A	BS00000905_51	32.902
												Hu et al. 2019	3B	RAC875_c9415_1229	49.429													Cabral et al. 2018	gwm273	1B.1	57.6293	Li et al. 2018	7A	IWB74161	53.1	Su et al. 2018	2A	wsnp_Ku_c14099_22301373	33.342
												Hu et al. 2019	3B	wsnp_Ex_c15399_23662312	49.734													Cabral et al. 2018	gwm18	1B.1	57.6293	Li et al. 2018	7A	IWB11012	60	Su et al. 2018	2A	wsnp_Ex_rep_c101866_87158671	33.379
												Hu et al. 2019	3B	Tdurum_contig49477_187	49.976													Cabral et al. 2018	wsnp_Ex_c51156_55193734	1B.1	58.849	Li et al. 2018	7A	IWB58488	67.8	Su et al. 2018	2A	wsnp_Ex_c12219_19526749	33.645
												Hu et al. 2019	3B	Kukri_c25794_863	50.353													Cabral et al. 2018	Kukri_c11587_99	1B.1	58.849	Li et al. 2018	7A	IWB3767	72.8	Su et al. 2018	2A	Tdurum_contig560_239	36.406
												Hu et al. 2019	3B	BS00033372_51	50.442													Cabral et al. 2018	RAC875_c47137_112	1B.1	58.849	Li et al. 2018	7A	IWB73363	73.4	Su et al. 2018	2A	wsnp_JG_c926_520103	37.826
												Hu et al. 2019	3B	wsnp_Ku_rep_c72504_72191206	50.796													Cabral et al. 2018	RAC875_c8849_134	1B.1	58.849	Li et al. 2018	7A	IWB2706	76.1	Su et al. 2018	2A	BobWhite_rep_c64680_305	37.826
												Hu et al. 2019	3B	Ra_c4329_599	50.835													Cabral et al. 2018	BS00005034	1B.1	58.849	Li et al. 2018	7A	IWB59511	79	Su et al. 2018	2A	RAC875_c13116_116	38.665
												Hu et al. 2019	3B	Excalibur_c6445_223	51.095													Cabral et al. 2018	BobWhite_c39153_131	1B.1	58.849	Li et al. 2018	7A	IWA7942	84.5	Su et al. 2018	2A	CAP8_c4813_252	38.665
												Hu et al. 2019	3B	RFL_Contig4421_1724	51.185													Cabral et al. 2018	BS00021995_51	1B.1	58.849	Li et al. 2018	7A	IWB8472	85.2	Su et al. 2018	2A	RAC875_rep_c70093_1079	38.704
												Hu et al. 2019	3B	wsnp_Ex_c5418_9575485	51.869													Cabral et al. 2018	BS00049927_51	1B.1	58.849	Li et al. 2018	7A	IWB58036	88.1	Su et al. 2018	2A	Excalibur_c37912_326	38.954
												Hu et al. 2019	3B	IAAV5835	52.775													Cabral et al. 2018	BS00067586_51	1B.1	58.849	Li et al. 2018	7A	IWB38303	92.4	Su et al. 2018	2A	RAC875_rep_c80737_162	38.954
												Hu et al. 2019	3B	wsnp_Ex_c1934_3648624	53.514													Cabral et al. 2018	BS00070198_51	1B.1	58.849	Li et al. 2018	7A	IWB28696	96.3	Su et al. 2018	2A	Excalibur_c113208_303	38.96
												Hu et al. 2019	3B	wsnp_Ex_c6245_10887043	53.629													Cabral et al. 2018	Excalibur_c13573_230	1B.1	58.849	Li et al. 2018	7A	IWB30703	102.1	Su et al. 2018	2A	Kukri_rep_c71876_521	39.685
												Hu et al. 2019	3B	wsnp_Ex_c3257_6003626	54.269													Cabral et al. 2018	Ku_c5960_496	1B.1	58.849	Li et al. 2018	7A	IWB52741	108.3	Su et al. 2018	2A	wsnp_Ex_c15325_23565794	41.243
												Hu et al. 2019	3B	wsnp_Ex_c8715_14590273	58.995													Cabral et al. 2018	Kukri_c19832_777	1B.1	58.849	Li et al. 2018	7A	IWB3334	115.5	Su et al. 2018	2A	wsnp_JD_c12088_12411845	41.243
												Hu et al. 2019	3B	Kukri_c5541_204	61.125													Cabral et al. 2018	Kukri_c26973_189	1B.1	58.849	Li et al. 2018	7A	IWB213	118.3	Su et al. 2018	2A	Kukri_c47534_1509	42.206
												Hu et al. 2019	3B	IAAV3736	62.01													Cabral et al. 2018	Kukri_c5098_1902	1B.1	58.849	Li et al. 2018	7A	IWA7432	124.1	Su et al. 2018	2A	Kukri_c86015_224	42.206
												Hu et al. 2019	3B	RAC875_c35720_456	62.234													Cabral et al. 2018	Kukri_c6135_150	1B.1	58.849	Li et al. 2018	7A	IWB12214	127.9	Su et al. 2018	2A	RAC875_c13116_541	42.206
												Hu et al. 2019	3B	wsnp_Ex_c3040_5616383	62.583													Cabral et al. 2018	Ra_c15153_324	1B.1	58.849	Li et al. 2018	7A	IWA1424	131.6	Su et al. 2018	2A	RAC875_c7699_292	42.206
												Hu et al. 2019	3B	Ku_c1575_338	62.667													Cabral et al. 2018	Ra_c69176_1308	1B.1	58.849	Li et al. 2018	7A	IWB35947	133.3	Su et al. 2018	2A	BS00070692_51	42.441
												Hu et al. 2019	3B	wsnp_Ku_c29102_39008953	62.96													Cabral et al. 2018	RAC875_c75885_302	1B.1	58.849	Li et al. 2018	7A	IWB7771	136.2	Su et al. 2018	2A	wsnp_Ex_c2887_5330426	42.791
												Hu et al. 2019	3B	wsnp_Ex_c64005_62986957	63.012													Cabral et al. 2018	Tdurum_contig42247_2504	1B.1	58.849	Li et al. 2018	7A	IWB9816	137.3	Su et al. 2018	2A	BS00036766_51	42.791
												Hu et al. 2019	3B	wsnp_Ex_c64005_62987067	63.319													Cabral et al. 2018	wsnp_Ex_c11976_19193550	1B.1	58.849	Li et al. 2018	7A	IWB52378	139.1	Su et al. 2018	2A	BS00039209_51	42.791
												Hu et al. 2019	3B	wsnp_BE497740B_Ta_2_1	64.191													Cabral et al. 2018	wsnp_Ex_c16581_25100502	1B.1	58.849	Li et al. 2018	7A	IWA4626	145.7	Su et al. 2018	2A	BS00039983_51	42.791
												Hu et al. 2019	3B	wsnp_Ex_c18915_27811736	64.42													Cabral et al. 2018	wsnp_Ku_c16938_25916260	1B.1	58.849	Li et al. 2018	7A	IWB66083	149.3	Su et al. 2018	2A	BS00055933_51	42.791
												Hu et al. 2019	3B	wsnp_BE497740B_Ta_2_2	64.629													Cabral et al. 2018	BS00009715	1B.1	58.849	Li et al. 2018	7A	IWB33958	152.2	Su et al. 2018	2A	BS00066978_51	42.791
												Hu et al. 2019	3B	BS00099633_51	65.108													Cabral et al. 2018	barc1160	1B.1	58.849	Li et al. 2018	7A	IWB34124	159.2	Su et al. 2018	2A	Excalibur_c15733_252	42.791
												Hu et al. 2019	3B	RAC875_c30507_292	65.547													Cabral et al. 2018	gpw4331	1B.1	58.849	Li et al. 2018	7A	IWB74465	160	Su et al. 2018	2A	Excalibur_c3108_5476	42.791
												Hu et al. 2019	3B	BS00070018_51	67.266													Cabral et al. 2018	tplb0029b01_123	1B.1	60.0993	Li et al. 2018	7A	IWB726	163.2	Su et al. 2018	2A	Excalibur_rep_c111743_194	42.791
												Hu et al. 2019	3B	BS00054326_51	68.162													Cabral et al. 2018	BobWhite_c8713_420	1B.1	60.0993	Li et al. 2018	7A	IWB72832	166.2	Su et al. 2018	2A	GENE-1365_255	42.791
												Hu et al. 2019	3B	BS00072993_51	68.375													Cabral et al. 2018	GENE-0227_217	1B.1	60.0993	Li et al. 2018	7A	IWB11163	169	Su et al. 2018	2A	Jagger_c2047_362	42.791
												Hu et al. 2019	3B	BS00052057_51	68.395													Cabral et al. 2018	Ku_c28949_178	1B.1	60.0993	Li et al. 2018	7A	IWB25140	172.4	Su et al. 2018	2A	Kukri_rep_c73477_888	42.791
												Hu et al. 2019	3B	BS00040742_51	68.651													Cabral et al. 2018	wsnp_Ex_c1412_2711077	1B.1	60.0993	Li et al. 2018	7A	IWB1914	176	Su et al. 2018	2A	Kukri_rep_c83485_398	42.791
												Hu et al. 2019	3B	CAP12_c3551_85	68.859													Cabral et al. 2018	wsnp_Ra_c21132_30487331	1B.1	60.0993	Li et al. 2018	7A	IWB6675	182.1	Su et al. 2018	2A	TA005222-0574	42.791
												Hu et al. 2019	3B	wsnp_JD_c4413_5541190	69.467													Cabral et al. 2018	BS00002378	1B.1	60.0993	Li et al. 2018	7A	IWB8847	188.9	Su et al. 2018	2A	Tdurum_contig48302_532	42.791
												Hu et al. 2019	3B	BS00077967_51	70.359													Cabral et al. 2018	BobWhite_c13450_2100	1B.1	60.0993	Li et al. 2018	7A	IWB48220	194.5	Su et al. 2018	2A	Tdurum_contig48302_539	42.791
												Hu et al. 2019	3B	BS00022403_51	70.812													Cabral et al. 2018	BobWhite_c1456_615	1B.1	60.0993	Li et al. 2018	7B	IWB49679	0	Su et al. 2018	2A	Tdurum_contig5311_67	42.791
												Hu et al. 2019	3B	tplb0044b20_1610	70.999													Cabral et al. 2018	BobWhite_c4236_410	1B.1	60.0993	Li et al. 2018	7B	IWB11170	4.9	Su et al. 2018	2A	Tdurum_contig9731_121	42.791
												Hu et al. 2019	3B	BS00063105_51	71.761													Cabral et al. 2018	BS00011450_51	1B.1	60.0993	Li et al. 2018	7B	IWB70056	5.5	Su et al. 2018	2A	wsnp_BG314532A_Ta_2_1	42.791
												Hu et al. 2019	3B	BS00059416_51	72.419													Cabral et al. 2018	BS00063885_51	1B.1	60.0993	Li et al. 2018	7B	IWB69202	6	Su et al. 2018	2A	JG_c883_445	43.236
												Hu et al. 2019	3B	Excalibur_rep_c97324_623	75.248													Cabral et al. 2018	Ex_c11539_279	1B.1	60.0993	Li et al. 2018	7B	IWB53150	6.4	Su et al. 2018	2A	GENE-1246_393	43.236
												Hu et al. 2019	3B	Excalibur_c71730_105	77.424													Cabral et al. 2018	Excalibur_c10319_229	1B.1	60.0993	Li et al. 2018	7B	IWB46158	7.2	Su et al. 2018	2A	JD_c4427_288	43.236
												Hu et al. 2019	3B	BS00030651_51	84.991													Cabral et al. 2018	Excalibur_c55805_316	1B.1	60.0993	Li et al. 2018	7B	IWB24743	9.2	Su et al. 2018	2A	wsnp_JD_c13086_13174510	43.953
												Hu et al. 2019	3B	BS00022861_51	90.575													Cabral et al. 2018	Excalibur_c9495_322	1B.1	60.0993	Li et al. 2018	7B	IW B35038	11.6	Su et al. 2018	2A	BS00062843_51	43.953
												Hu et al. 2019	3B	Tdurum_contig59953_220	92.259													Cabral et al. 2018	Excalibur_rep_c106001_513	1B.1	60.0993	Li et al. 2018	7B	IWB35013	13.3	Su et al. 2018	2A	Kukri_c15308_173	43.953
												Hu et al. 2019	3B	BS00026062_51	95.304													Cabral et al. 2018	Excalibur_rep_c67757_264	1B.1	60.0993	Li et al. 2018	7B	IW B67828	17.3	Su et al. 2018	2A	Kukri_c24852_466	43.953
												Hu et al. 2019	3B	IAAV8892	99.5													Cabral et al. 2018	Excalibur_s113941_196	1B.1	60.0993	Li et al. 2018	7B	IWB61463	21.1	Su et al. 2018	2A	Kukri_c40035_258	43.953
												Hu et al. 2019	3B	BS00071041_51	115.475													Cabral et al. 2018	GENE-0522_336	1B.1	60.0993	Li et al. 2018	7B	IWB8019	25.2	Su et al. 2018	2A	Kukri_rep_c104727_91	43.953
												Hu et al. 2019	3D	Kukri_c8870_721	0													Cabral et al. 2018	IAAV2764	1B.1	60.0993	Li et al. 2018	7B	IWB14578	30.4	Su et al. 2018	2A	wsnp_Ex_c15325_23565935	43.953
												Hu et al. 2019	3D	IAAV7546	1.574													Cabral et al. 2018	IAAV3905	1B.1	60.0993	Li et al. 2018	7B	IWB48794	32.4	Su et al. 2018	2A	wsnp_Ex_rep_c68113_66877517	43.953
												Hu et al. 2019	3D	RAC875_c30632_793	1.621													Cabral et al. 2018	Kukri_c12936_1505	1B.1	60.0993	Li et al. 2018	7B	IWB30279	35	Su et al. 2018	2A	Kukri_c44997_377	44.439
												Hu et al. 2019	3D	BS00070468_51	30.322													Cabral et al. 2018	Kukri_c31554_437	1B.1	60.0993	Li et al. 2018	7B	IWB22804	36.4	Su et al. 2018	2A	BS00028759_51	44.439
												Hu et al. 2019	4A	Tdurum_contig1868_249	0													Cabral et al. 2018	Kukri_rep_c101550_113	1B.1	60.0993	Li et al. 2018	7B	IWB65700	37.3	Su et al. 2018	2A	BS00104558_51	44.439
												Hu et al. 2019	4A	Ku_c7594_1179	2.632													Cabral et al. 2018	RAC875_c7236_3265	1B.1	60.0993	Li et al. 2018	7B	IWA1881	39.6	Su et al. 2018	2A	Excalibur_c1535_1115	44.439
												Hu et al. 2019	4A	wsnp_Ex_c22913_32130617	3.278													Cabral et al. 2018	RAC875_c864_88	1B.1	60.0993	Li et al. 2018	7B	IWB1824	41	Su et al. 2018	2A	Excalibur_c21269_176	44.439
												Hu et al. 2019	4A	IACX3391	3.647													Cabral et al. 2018	tplb0029b01_1022	1B.1	60.0993	Li et al. 2018	7B	IWB28152	45.7	Su et al. 2018	2A	IACX636	44.439
												Hu et al. 2019	4A	Kukri_c53787_620	4.336													Cabral et al. 2018	wsnp_Ex_c37635_45347415	1B.1	60.0993	Li et al. 2018	7B	IWB6242	49.7	Su et al. 2018	2A	Kukri_c45015_145	44.439
												Hu et al. 2019	4A	BS00036493_51	4.769													Cabral et al. 2018	wsnp_Ex_c9902_16309166	1B.1	60.0993	Li et al. 2018	7B	IWA1971	53.2	Su et al. 2018	2A	Kukri_c45015_363	44.439
												Hu et al. 2019	4A	Kukri_rep_c101034_516	5.443													Cabral et al. 2018	wsnp_RFL_Contig4726_5654774	1B.1	60.0993	Li et al. 2018	7B	IWA5967	57	Su et al. 2018	2A	RAC875_rep_c119471_174	44.439
												Hu et al. 2019	4A	Ku_c766_1798	8.573													Cabral et al. 2018	gwm374.2	1B.1	60.0993	Li et al. 2018	7B	IWB69177	61.1	Su et al. 2018	2A	TA003045-1227	44.439
												Hu et al. 2019	4A	wsnp_Ex_c54453_57331510	9.972													Cabral et al. 2018	CAP7_c1241_128	1B.1	60.0993	Li et al. 2018	7B	IWB11033	64.8	Su et al. 2018	2A	TA004055-0626	44.439
												Hu et al. 2019	4A	wsnp_CAP8_c1013_646748	10.266													Cabral et al. 2018	wmc156	1B.1	60.0993	Li et al. 2018	7B	IWB8178	65	Su et al. 2018	2A	Tdurum_contig44062_733	44.439
												Hu et al. 2019	4A	BS00022015_51	10.47													Cabral et al. 2018	wsnp_Ex_c3681_6715277	1B.1	60.0993	Li et al. 2018	7B	IWB71690	66.1	Su et al. 2018	2A	Tdurum_contig62073_376	44.439
												Hu et al. 2019	4A	BS00089283_51	10.715													Cabral et al. 2018	BS00000496	1B.1	60.0993	Li et al. 2018	7B	IWB28112	68	Su et al. 2018	2A	wsnp_BE498730A_Ta_2_2	44.439
												Hu et al. 2019	4A	RAC875_c754_120	13.163													Cabral et al. 2018	BS00003567	1B.1	60.0993	Li et al. 2018	7B	IWB57792	70.3	Su et al. 2018	2A	wsnp_CD453913A_Ta_2_1	44.439
												Hu et al. 2019	4A	wsnp_Ex_rep_c67145_65628860	14.453													Cabral et al. 2018	BS00003634	1B.1	60.0993	Li et al. 2018	7B	IWA2368	73	Su et al. 2018	2A	wsnp_Ex_c60588_60977198	44.439
												Hu et al. 2019	4A	BobWhite_rep_c66057_98	16.218													Cabral et al. 2018	BS00003677	1B.1	60.0993	Li et al. 2018	7B	IWB70893	74.4	Su et al. 2018	2A	wsnp_Ex_rep_c69124_68035485	44.439
												Hu et al. 2019	4A	wsnp_Ex_c5690_9994305	19.061													Cabral et al. 2018	wmc213	1B.1	60.0993	Li et al. 2018	7B	IWB30203	77	Su et al. 2018	2A	wsnp_Ex_rep_c69124_68035904	44.439
												Hu et al. 2019	4A	BS00004170_51	20.426													Cabral et al. 2018	BobWhite_c11235_370	1B.1	60.0993	Li et al. 2018	7B	IWB5766	79	Su et al. 2018	2A	wsnp_JD_c6436_7600132	44.439
												Hu et al. 2019	4A	Ra_c7973_1185	20.624													Cabral et al. 2018	BobWhite_c17137_82	1B.1	60.0993	Li et al. 2018	7B	IWB72827	81.8	Su et al. 2018	2A	wsnp_Ku_c6826_11860405	44.439
												Hu et al. 2019	4A	wsnp_Ex_c31508_40288653	22.178													Cabral et al. 2018	BobWhite_c28635_896	1B.1	60.0993	Li et al. 2018	7B	IWB58568	83.8	Su et al. 2018	2A	wsnp_Ku_rep_c102140_89178676	44.439
												Hu et al. 2019	4A	CAP8_c6777_308	22.265													Cabral et al. 2018	BobWhite_c346_253	1B.1	60.0993	Li et al. 2018	7B	IWB7861	85.8	Su et al. 2018	2A	wsnp_Ra_c19526_28719561	44.439
												Hu et al. 2019	4A	wsnp_Ex_c3541_6477925	22.33													Cabral et al. 2018	BS00011390_51	1B.1	60.0993	Li et al. 2018	7B	IWB68215	87.4	Su et al. 2018	2A	Kukri_c12849_1392	44.61
												Hu et al. 2019	4A	wsnp_Ex_c54395_57291841	23.247													Cabral et al. 2018	BS00011712_51	1B.1	60.0993	Li et al. 2018	7B	IWB36362	90.2	Su et al. 2018	2A	tplb0035c15_1515	44.852
												Hu et al. 2019	4A	wsnp_CAP8_c296_283066	23.39													Cabral et al. 2018	BS00012051_51	1B.1	60.0993	Li et al. 2018	7B	IWB46381	92.3	Su et al. 2018	2A	BobWhite_c13752_400	45.178
												Hu et al. 2019	4A	Kukri_c6954_320	23.456													Cabral et al. 2018	BS00021946_51	1B.1	60.0993	Li et al. 2018	7B	IWB28543	94.4	Su et al. 2018	2A	Kukri_c7818_2581	45.551
												Hu et al. 2019	4A	wsnp_Ex_c6044_10590322	23.497													Cabral et al. 2018	BS00021947_51	1B.1	60.0993	Li et al. 2018	7B	IWB2238	97.5	Su et al. 2018	2A	RAC875_rep_c105312_95	45.551
												Hu et al. 2019	4A	wsnp_Ex_c4286_7734046	23.836													Cabral et al. 2018	BS00022133_51	1B.1	60.0993	Li et al. 2018	7B	IWB62681	100	Su et al. 2018	2A	Kukri_c7914_99	45.654
												Hu et al. 2019	4A	wsnp_Ex_c14641_22698595	23.868													Cabral et al. 2018	BS00038929_51	1B.1	60.0993	Li et al. 2018	7B	IWB12006	103.9	Su et al. 2018	2A	GENE-1075_265	45.654
												Hu et al. 2019	4A	wsnp_Ex_c12818_20334501	23.977													Cabral et al. 2018	BS00041947_51	1B.1	60.0993	Li et al. 2018	7B	IWB53852	104.2	Su et al. 2018	2A	wsnp_Ex_c15325_23564654	45.769
												Hu et al. 2019	4A	CAP11_c8388_194	25.022													Cabral et al. 2018	BS00067434_51	1B.1	60.0993	Li et al. 2018	7B	IWB57015	106.8	Su et al. 2018	2A	RAC875_c17628_867	46.875
												Hu et al. 2019	4A	wsnp_Ku_c32619_42216179	25.131													Cabral et al. 2018	BS00069723_51	1B.1	60.0993	Li et al. 2018	7B	IWB10088	108	Su et al. 2018	2A	BobWhite_c17476_149	48.429
												Hu et al. 2019	4A	Ra_c30013_483	27.447													Cabral et al. 2018	BS00070139_51	1B.1	60.0993	Li et al. 2018	7B	IWB26637	110.3	Su et al. 2018	2A	Kukri_rep_c100955_214	49.819
												Hu et al. 2019	4A	Kukri_c39882_203	28.233													Cabral et al. 2018	BS00075663_51	1B.1	60.0993	Li et al. 2018	7D	IWB21158	0	Su et al. 2018	2A	Tdurum_contig30201_63	51.523
												Hu et al. 2019	4A	BS00034174_51	28.89													Cabral et al. 2018	BS00076696_51	1B.1	60.0993	Li et al. 2018	7D	IWB3214	3.2	Su et al. 2018	2A	BS00090569_51	54.701
												Hu et al. 2019	4A	Kukri_c48385_121	29.252													Cabral et al. 2018	BS00078228_51	1B.1	60.0993	Li et al. 2018	7D	IWB46796	6.7	Su et al. 2018	2A	IACX6337	55.553
												Hu et al. 2019	4A	Kukri_c36190_189	35.078													Cabral et al. 2018	BS00093841_51	1B.1	60.0993	Li et al. 2018	7D	IWB4469	9.1	Su et al. 2018	2A	BS00022241_51	56.459
												Hu et al. 2019	4A	wsnp_Ex_c48449_53350799	35.518													Cabral et al. 2018	BS00094498_51	1B.1	60.0993	Li et al. 2018	7D	IWB22812	10.5	Su et al. 2018	2A	GENE-1792_762	56.974
												Hu et al. 2019	4A	RAC875_c48107_65	39.845													Cabral et al. 2018	BS00094499_51	1B.1	60.0993	Li et al. 2018	7D	IWB15569	17.3	Su et al. 2018	2A	wsnp_Ex_c28942_38018762	57.547
												Hu et al. 2019	4A	Jagger_c4331_105	43.727													Cabral et al. 2018	BS00095568_51	1B.1	60.0993	Li et al. 2018	7D	IW B51608	20.8	Su et al. 2018	2A	wsnp_Ra_c107797_91270622	58.173
												Hu et al. 2019	4A	BS00040647_51	67.134													Cabral et al. 2018	BS00110148_51	1B.1	60.0993	Li et al. 2018	7D	IW B56429	23.7	Su et al. 2018	2A	RAC875_rep_c113120_326	58.564
												Hu et al. 2019	4A	wsnp_Ku_c1205_2398925	70.123													Cabral et al. 2018	BS00110149_51	1B.1	60.0993	Li et al. 2018	7D	IWB74165	24.8	Su et al. 2018	2A	Excalibur_rep_c69799_1999	58.676
												Hu et al. 2019	4A	BobWhite_c19919_516	71.127													Cabral et al. 2018	BS00110480_51	1B.1	60.0993	Li et al. 2018	7D	IWB18914	27	Su et al. 2018	2A	BS00027830_51	59.083
												Hu et al. 2019	4A	BS00068243_51	71.577													Cabral et al. 2018	Excalibur_c32708_515	1B.1	60.0993	Li et al. 2018	7D	IWB6964	28.5	Su et al. 2018	2A	wsnp_Ex_rep_c67751_66428606	59.254
												Hu et al. 2019	4A	BS00021715_51	72.616													Cabral et al. 2018	Excalibur_c59016_839	1B.1	60.0993	Li et al. 2018	7D	IWB35446	29.6	Su et al. 2018	2A	IAAV6972	59.291
												Hu et al. 2019	4A	BS00072025_51	74.134													Cabral et al. 2018	Excalibur_c85140_173	1B.1	60.0993	Li et al. 2018	7D	IWA1247	32.4	Su et al. 2018	2A	RAC875_c13247_1032	59.816
												Hu et al. 2019	4A	IAAV615	74.823													Cabral et al. 2018	GENE-0136_82	1B.1	60.0993	Li et al. 2018	7D	IWB44453	34.4	Su et al. 2018	2A	wsnp_Ex_c5984_10493714	59.816
												Hu et al. 2019	4A	BS00021727_51	76.522													Cabral et al. 2018	GENE-0549_18	1B.1	60.0993	Li et al. 2018	7D	IWB36729	38.3	Su et al. 2018	2A	wsnp_Ex_rep_c69799_68761171	59.816
												Hu et al. 2019	4A	GENE-2384_84	0													Cabral et al. 2018	GENE-1150_214	1B.1	60.0993	Li et al. 2018	7D	IW B62916	38.8	Su et al. 2018	2A	Kukri_rep_c69422_54	60.161
												Hu et al. 2019	4A	wsnp_Ex_c11684_18805687	3.211													Cabral et al. 2018	GENE-3085_533	1B.1	60.0993	Li et al. 2018	7D	IW A4966	40	Su et al. 2018	2A	IAAV2718	61.284
												Hu et al. 2019	4A	IAAV7132	4.412													Cabral et al. 2018	GENE-4605_536	1B.1	60.0993	Li et al. 2018	7D	IWA235	41.8	Su et al. 2018	2A	RAC875_rep_c70010_692	62.974
												Hu et al. 2019	4A	wsnp_Ex_c24474_33721784	6.137													Cabral et al. 2018	IAAV1808	1B.1	60.0993	Li et al. 2018	7D	IWB19741	43.9	Su et al. 2018	2A	BS00064174_51	63.353
												Hu et al. 2019	4A	BobWhite_c19919_572	6.594													Cabral et al. 2018	IAAV2287	1B.1	60.0993	Li et al. 2018	7D	IWB25115	45.2	Su et al. 2018	2A	Excalibur_c11870_477	63.353
												Hu et al. 2019	4A	RAC875_c34231_812	13.429													Cabral et al. 2018	IAAV5704	1B.1	60.0993	Li et al. 2018	7D	IWB13273	47.4	Su et al. 2018	2A	GENE-1381_132	63.383
												Hu et al. 2019	4A	BS00064269_51	13.926													Cabral et al. 2018	IAAV6825	1B.1	60.0993	Li et al. 2018	7D	IWB10304	49.9	Su et al. 2018	2A	wsnp_Ex_c10084_16572374	63.849
												Hu et al. 2019	4A	Excalibur_c21964_237	14.997													Cabral et al. 2018	IAAV8347	1B.1	60.0993	Li et al. 2018	7D	IWB58968	53.3	Su et al. 2018	2A	RAC875_c13390_174	64.346
												Hu et al. 2019	4A	RAC875_c20429_903	16.129													Cabral et al. 2018	IACX5814	1B.1	60.0993	Li et al. 2018	7D	IWB8600	56.3	Su et al. 2018	2A	RAC875_c13390_1096	64.346
												Hu et al. 2019	4A	Kukri_c6224_492	19.08													Cabral et al. 2018	JD_c6360_288	1B.1	60.0993	Li et al. 2018	7D	IWB27602	58.2	Su et al. 2018	2A	Ku_c8927_2075	64.513
												Hu et al. 2019	4A	Kukri_rep_c106490_583	25.012													Cabral et al. 2018	Ku_c10106_313	1B.1	60.0993	Li et al. 2018	7D	IWB47725	61.1	Su et al. 2018	2A	RAC875_c21906_247	64.882
												Hu et al. 2019	4A	tplb0033c09_1345	25.395													Cabral et al. 2018	Ku_c13515_171	1B.1	60.0993	Li et al. 2018	7D	IW B68499	63.3	Su et al. 2018	2A	RAC875_c52458_454	64.882
												Hu et al. 2019	4A	RAC875_c88582_316	27.011													Cabral et al. 2018	Kukri_c12151_467	1B.1	60.0993	Li et al. 2018	7D	IWB52211	65.9	Su et al. 2018	2A	wsnp_Ex_c1604_3060855	64.882
												Hu et al. 2019	4A	wsnp_Ra_c16476_25132652	29.182													Cabral et al. 2018	Kukri_c12151_769	1B.1	60.0993	Li et al. 2018	7D	IW B53966	66.2	Su et al. 2018	2A	Kukri_c62142_683	65.018
												Hu et al. 2019	4A	CAP11_c1989_183	30.575													Cabral et al. 2018	Kukri_c2871_258	1B.1	60.0993	Li et al. 2018	7D	IWB41575	69.1	Su et al. 2018	2A	BobWhite_c17403_635	65.223
												Hu et al. 2019	4A	BS00039147_51	35.993													Cabral et al. 2018	Kukri_c34894_112	1B.1	60.0993	Li et al. 2018	7D	IWB26629	71.7	Su et al. 2018	2A	BS00035883_51	65.535
												Hu et al. 2019	4A	wsnp_Ex_c2352_4405961	36.82													Cabral et al. 2018	Kukri_c51474_334	1B.1	60.0993	Li et al. 2018	7D	IWB64776	73.5	Su et al. 2018	2A	wsnp_Ex_c7829_13320760	65.535
												Hu et al. 2019	4A	CAP12_c2972_140	42.605													Cabral et al. 2018	Kukri_c75097_56	1B.1	60.0993	Li et al. 2018	7D	IWB30126	75.8	Su et al. 2018	2A	TA001163-0861	65.88
												Hu et al. 2019	4A	BS00070327_51	43.577													Cabral et al. 2018	Kukri_c75399_226	1B.1	60.0993	Li et al. 2018	7D	IW B63887	79.9	Su et al. 2018	2A	BobWhite_c12090_117	65.88
												Hu et al. 2019	4A	GENE-4618_413	45.59													Cabral et al. 2018	Kukri_rep_c73393_848	1B.1	60.0993	Li et al. 2018	7D	IWB43856	82.5	Su et al. 2018	2A	BobWhite_c3599_565	65.88
												Hu et al. 2019	4A	BS00066891_51	45.774													Cabral et al. 2018	Ra_c3083_982	1B.1	60.0993	Li et al. 2018	7D	IWB10689	84.9	Su et al. 2018	2A	BS00063295_51	65.88
												Hu et al. 2019	4A	wsnp_Ex_c3988_7221220	46.39													Cabral et al. 2018	RAC875_c24337_1280	1B.1	60.0993	Li et al. 2018	7D	IWB9578	88.8	Su et al. 2018	2A	Excalibur_c54115_317	65.88
												Hu et al. 2019	4A	Tdurum_contig19920_463	46.883													Cabral et al. 2018	RAC875_c32894_1038	1B.1	60.0993	Li et al. 2018	7D	IWB10006	90.4	Su et al. 2018	2A	Kukri_c13187_556	65.88
												Hu et al. 2019	4A	Kukri_c9259_421	47.23													Cabral et al. 2018	RAC875_c51240_89	1B.1	60.0993	Li et al. 2018	7D	IWB45642	92.9	Su et al. 2018	2A	tplb0042l03_580	65.88
												Hu et al. 2019	4A	RAC875_c35979_263	47.409													Cabral et al. 2018	RAC875_c5796_424	1B.1	60.0993	Li et al. 2018	7D	IWB41291	95.7	Su et al. 2018	2A	wsnp_Ex_c15681_24016359	65.88
												Hu et al. 2019	4A	Excalibur_c18758_77	47.984													Cabral et al. 2018	RAC875_c6905_776	1B.1	60.0993	Li et al. 2018	7D	IWB7611	98.1	Su et al. 2018	2A	IAAV1698	65.977
												Hu et al. 2019	4A	RAC875_c83401_115	48.874													Cabral et al. 2018	RAC875_c865_1936	1B.1	60.0993	Li et al. 2018	7D	IWB48575	102.5	Su et al. 2018	2A	Kukri_c34983_190	67.146
												Hu et al. 2019	4A	Tdurum_contig65718_209	49.244													Cabral et al. 2018	RAC875_rep_c71685_445	1B.1	60.0993	Li et al. 2018	7D	IW B40270	105.9	Su et al. 2018	2A	TA005373-0506	67.307
												Hu et al. 2019	4A	RAC875_c6939_1042	49.662													Cabral et al. 2018	RAC875_s105188_92	1B.1	60.0993	Li et al. 2018	7D	IWB17534	107.1	Su et al. 2018	2A	BobWhite_c8982_226	67.307
												Hu et al. 2019	4A	Kukri_c17417_134	61.169													Cabral et al. 2018	RFL_Contig981_1985	1B.1	60.0993	Li et al. 2018	7D	IW B58997	109.5	Su et al. 2018	2A	GENE-0684_1473	67.406
												Hu et al. 2019	4A	wsnp_Ex_c1246_2393978	61.757													Cabral et al. 2018	Tdurum_contig20191_171	1B.1	60.0993					Su et al. 2018	2A	BobWhite_c12157_747	67.406
												Hu et al. 2019	4A	Kukri_c13761_379	62.719													Cabral et al. 2018	Tdurum_contig25434_209	1B.1	60.0993					Su et al. 2018	2A	BobWhite_c16917_732	67.406
												Hu et al. 2019	4A	BS00021989_51	63.622													Cabral et al. 2018	Tdurum_contig25434_218	1B.1	60.0993					Su et al. 2018	2A	BobWhite_c22273_227	67.406
												Hu et al. 2019	4A	RFL_Contig4686_700	63.79													Cabral et al. 2018	Tdurum_contig28305_106	1B.1	60.0993					Su et al. 2018	2A	BobWhite_c2244_314	67.406
												Hu et al. 2019	4A	Jagger_c504_109	64.454													Cabral et al. 2018	Tdurum_contig29676_141	1B.1	60.0993					Su et al. 2018	2A	BobWhite_c26329_71	67.406
												Hu et al. 2019	4A	RAC875_c22936_495	64.617													Cabral et al. 2018	Tdurum_contig42217_127	1B.1	60.0993					Su et al. 2018	2A	BobWhite_c30745_232	67.406
												Hu et al. 2019	4A	wsnp_CAP7_c254_138937	65.159													Cabral et al. 2018	Tdurum_contig43910_1113	1B.1	60.0993					Su et al. 2018	2A	BobWhite_c32336_504	67.406
												Hu et al. 2019	4A	BS00110926_51	67.909													Cabral et al. 2018	Tdurum_contig43910_687	1B.1	60.0993					Su et al. 2018	2A	BobWhite_c36545_259	67.406
												Hu et al. 2019	4A	Tdurum_contig42019_1714	71.224													Cabral et al. 2018	Tdurum_contig48171_189	1B.1	60.0993					Su et al. 2018	2A	BobWhite_c38419_677	67.406
												Hu et al. 2019	4A	BobWhite_c47168_289	71.748													Cabral et al. 2018	Tdurum_contig57731_162	1B.1	60.0993					Su et al. 2018	2A	BobWhite_c58572_190	67.406
												Hu et al. 2019	4A	Excalibur_c6050_323	72.805													Cabral et al. 2018	Tdurum_contig57731_225	1B.1	60.0993					Su et al. 2018	2A	BobWhite_c9297_291	67.406
												Hu et al. 2019	4A	Ra_c6672_1679	73.177													Cabral et al. 2018	Tdurum_contig57731_412	1B.1	60.0993					Su et al. 2018	2A	BobWhite_rep_c50186_469	67.406
												Hu et al. 2019	4A	BS00110281_51	73.294													Cabral et al. 2018	tplb0058h11_348	1B.1	60.0993					Su et al. 2018	2A	BobWhite_rep_c50186_522	67.406
												Hu et al. 2019	4A	BS00049695_51	73.588													Cabral et al. 2018	wsnp_BE403956B_Ta_2_3	1B.1	60.0993					Su et al. 2018	2A	BobWhite_rep_c53418_120	67.406
												Hu et al. 2019	4A	wsnp_Ex_c33778_42210283	74.848													Cabral et al. 2018	wsnp_BE442716B_Ta_2_1	1B.1	60.0993					Su et al. 2018	2A	BobWhite_rep_c65086_86	67.406
												Hu et al. 2019	4A	RAC875_rep_c100803_217	75.147													Cabral et al. 2018	wsnp_BE442716B_Ta_2_2	1B.1	60.0993					Su et al. 2018	2A	BobWhite_rep_c65414_271	67.406
												Hu et al. 2019	4A	Excalibur_c2827_227	75.27													Cabral et al. 2018	wsnp_BE591501B_Ta_2_1	1B.1	60.0993					Su et al. 2018	2A	BS00031459_51	67.406
												Hu et al. 2019	4A	IAAV1943	75.754													Cabral et al. 2018	wsnp_CAP11_c631_419930	1B.1	60.0993					Su et al. 2018	2A	BS00064459_51	67.406
												Hu et al. 2019	4A	Kukri_c19883_629	76.183													Cabral et al. 2018	wsnp_CAP7_c940_480745	1B.1	60.0993					Su et al. 2018	2A	BS00067927_51	67.406
												Hu et al. 2019	4A	RAC875_c11237_357	76.7													Cabral et al. 2018	wsnp_Ex_c2025_3799847	1B.1	60.0993					Su et al. 2018	2A	BS00068203_51	67.406
												Hu et al. 2019	4A	Tdurum_contig9530_69	78.262													Cabral et al. 2018	wsnp_Ex_c3681_6716255	1B.1	60.0993					Su et al. 2018	2A	BS00092666_51	67.406
												Hu et al. 2019	4A	Tdurum_contig63050_264	78.738													Cabral et al. 2018	wsnp_Ex_c8865_14815305	1B.1	60.0993					Su et al. 2018	2A	BS00097299_51	67.406
												Hu et al. 2019	4A	wsnp_Ku_c9746_16265584	79.834													Cabral et al. 2018	wsnp_Ex_rep_c66883_65286958	1B.1	60.0993					Su et al. 2018	2A	D_contig67844_85	67.406
												Hu et al. 2019	4A	BS00087277_51	80.018													Cabral et al. 2018	wsnp_Ex_rep_c68712_67571580	1B.1	60.0993					Su et al. 2018	2A	D_F5MV3MU01EQX37_66	67.406
												Hu et al. 2019	4A	Kukri_c3866_718	80.084													Cabral et al. 2018	wsnp_Ku_c9971_16598986	1B.1	60.0993					Su et al. 2018	2A	D_GDS7LZN02FDZX8_269	67.406
												Hu et al. 2019	4A	wsnp_Ex_c5072_9006966	81.155													Cabral et al. 2018	wsnp_Ra_c2027_3945713	1B.1	60.0993					Su et al. 2018	2A	Ex_c8179_1452	67.406
												Hu et al. 2019	4A	RFL_Contig3621_596	81.678													Cabral et al. 2018	gwm131	1B.1	60.0993					Su et al. 2018	2A	Excalibur_c10133_292	67.406
												Hu et al. 2019	4B	Tdurum_contig81460_347	0													Cabral et al. 2018	wsnp_Ra_c2027_3945764	1B.1	60.0993					Su et al. 2018	2A	Excalibur_c1027_927	67.406
												Hu et al. 2019	4B	Tdurum_contig11733_825	0.488													Cabral et al. 2018	BobWhite_c28635_785	1B.1	60.0993					Su et al. 2018	2A	Excalibur_c1140_1044	67.406
												Hu et al. 2019	4B	BS00040127_51	0.878													Cabral et al. 2018	GENE-0505_443	1B.1	60.0993					Su et al. 2018	2A	Excalibur_c12922_1888	67.406
												Hu et al. 2019	4B	IAAV1120	2.027													Cabral et al. 2018	IACX2701	1B.1	60.0993					Su et al. 2018	2A	Excalibur_c19305_473	67.406
												Hu et al. 2019	4B	BS00095028_51	2.831													Cabral et al. 2018	JD_c64600_281	1B.1	60.0993					Su et al. 2018	2A	Excalibur_c22687_1091	67.406
												Hu et al. 2019	4B	Tdurum_contig5427_314	3.098													Cabral et al. 2018	RAC875_c32894_1116	1B.1	60.0993					Su et al. 2018	2A	Excalibur_c2426_931	67.406
												Hu et al. 2019	4B	wsnp_Ex_c17561_26284693	3.544													Cabral et al. 2018	Tdurum_contig28530_380	1B.1	60.0993					Su et al. 2018	2A	Excalibur_c3120_889	67.406
												Hu et al. 2019	4B	BS00060041_51	5.029													Cabral et al. 2018	Tdurum_contig87816_268	1B.1	60.0993					Su et al. 2018	2A	Excalibur_c42799_210	67.406
												Hu et al. 2019	4B	Ku_c4580_535	5.621													Cabral et al. 2018	wsnp_CAP11_c4558_2144436	1B.1	60.0993					Su et al. 2018	2A	Excalibur_c47219_820	67.406
												Hu et al. 2019	4B	Kukri_c49506_396	10.546													Cabral et al. 2018	wsnp_Ex_c34966_43196962	1B.1	60.0993					Su et al. 2018	2A	Excalibur_c4775_71	67.406
												Hu et al. 2019	4B	BS00009573_51	12.096													Cabral et al. 2018	BobWhite_c33506_732	1B.1	60.6458					Su et al. 2018	2A	Excalibur_c65341_321	67.406
												Hu et al. 2019	4B	Excalibur_c64418_447	13.71													Cabral et al. 2018	wmc216	1B.1	60.6458					Su et al. 2018	2A	Excalibur_c65796_394	67.406
												Hu et al. 2019	4B	Tdurum_contig47622_234	15.077													Cabral et al. 2018	wmc694	1B.1	60.6458					Su et al. 2018	2A	Excalibur_c95944_300	67.406
												Hu et al. 2019	4B	Tdurum_contig67399_676	15.321													Cabral et al. 2018	barc1131	1B.1	60.6458					Su et al. 2018	2A	Excalibur_rep_c104620_183	67.406
												Hu et al. 2019	4B	Tdurum_contig31139_143	15.718													Cabral et al. 2018	barc207	1B.1	60.6458					Su et al. 2018	2A	GENE-0342_117	67.406
												Hu et al. 2019	4B	Tdurum_contig31139_79	15.73													Cabral et al. 2018	wsnp_Ex_c6611_11452297	1B.1	60.6458					Su et al. 2018	2A	GENE-0684_1611	67.406
												Hu et al. 2019	4B	wsnp_Ku_c7180_12403155	15.78													Cabral et al. 2018	BS00022619_51	1B.1	60.6458					Su et al. 2018	2A	GENE-0746_101	67.406
												Hu et al. 2019	4B	wsnp_Ex_c18318_27140346	16.417													Cabral et al. 2018	BS00070147_51	1B.1	60.6458					Su et al. 2018	2A	GENE-0808_728	67.406
												Hu et al. 2019	4B	BS00011510_51	16.664													Cabral et al. 2018	BS00071788_51	1B.1	60.6458					Su et al. 2018	2A	GENE-0862_322	67.406
												Hu et al. 2019	4B	Tdurum_contig82942_681	17.952													Cabral et al. 2018	Excalibur_c14801_451	1B.1	60.6458					Su et al. 2018	2A	GENE-1000_141	67.406
												Hu et al. 2019	4B	Kukri_rep_c106598_51	18.035													Cabral et al. 2018	Excalibur_c5218_75	1B.1	60.6458					Su et al. 2018	2A	GENE-1000_186	67.406
												Hu et al. 2019	4B	BS00009480_51	18.312													Cabral et al. 2018	Excalibur_c90096_77	1B.1	60.6458					Su et al. 2018	2A	GENE-1012_303	67.406
												Hu et al. 2019	4B	GENE-4933_1085	18.612													Cabral et al. 2018	JD_c3116_778	1B.1	60.6458					Su et al. 2018	2A	GENE-1176_655	67.406
												Hu et al. 2019	4B	Excalibur_rep_c79414_306	18.764													Cabral et al. 2018	RAC875_c87890_234	1B.1	60.6458					Su et al. 2018	2A	GENE-1236_418	67.406
												Hu et al. 2019	4B	wsnp_Ex_c30695_39579408	22.082													Cabral et al. 2018	RAC875_c87890_312	1B.1	60.6458					Su et al. 2018	2A	GENE-1316_218	67.406
												Hu et al. 2019	4B	wsnp_Ra_c9823_16313377	22.587													Cabral et al. 2018	RAC875_rep_c119728_146	1B.1	60.6458					Su et al. 2018	2A	GENE-1388_216	67.406
												Hu et al. 2019	4B	RAC875_c6749_954	23.466													Cabral et al. 2018	TA003725-0553	1B.1	60.6458					Su et al. 2018	2A	GENE-1388_98	67.406
												Hu et al. 2019	4B	BS00022431_51	24.383													Cabral et al. 2018	Tdurum_contig59449_249	1B.1	60.6458					Su et al. 2018	2A	GENE-4595_327	67.406
												Hu et al. 2019	4B	RAC875_c27536_611	35.948													Cabral et al. 2018	Tdurum_contig59449_400	1B.1	60.6458					Su et al. 2018	2A	IAAV2142	67.406
												Hu et al. 2019	4B	Ra_c26080_461	37.421													Cabral et al. 2018	Tdurum_contig81102_102	1B.1	60.6458					Su et al. 2018	2A	IAAV8053	67.406
												Hu et al. 2019	4B	BS00084070_51	37.715													Cabral et al. 2018	tplb0024i15_1754	1B.1	60.6458					Su et al. 2018	2A	JD_c19101_46	67.406
												Hu et al. 2019	4B	BS00033614_51	38.004													Cabral et al. 2018	wsnp_Ex_c6611_11451949	1B.1	60.6458					Su et al. 2018	2A	Jagger_c9471_247	67.406
												Hu et al. 2019	4B	Tdurum_contig94674_195	38.255													Cabral et al. 2018	CAP11_c2974_53	1B.1	61.1922					Su et al. 2018	2A	Kukri_c13624_201	67.406
												Hu et al. 2019	4B	Tdurum_contig92931_787	39.042													Cabral et al. 2018	BS00039583_51	1B.1	61.1922					Su et al. 2018	2A	Kukri_c209_477	67.406
												Hu et al. 2019	4B	Tdurum_contig61465_781	39.585													Cabral et al. 2018	wsnp_Ra_c19148_28288923	1B.1	61.7387					Su et al. 2018	2A	Kukri_c3115_279	67.406
												Hu et al. 2019	4B	BS00102182_51	41.654													Cabral et al. 2018	Tdurum_contig60509_232	1B.1	61.7387					Su et al. 2018	2A	Kukri_c33884_551	67.406
												Hu et al. 2019	4B	Tdurum_contig4974_1386	42.101													Cabral et al. 2018	Tdurum_contig63834_340	1B.1	61.7387					Su et al. 2018	2A	Kukri_c33884_632	67.406
												Hu et al. 2019	4B	Tdurum_contig61509_538	42.347													Cabral et al. 2018	BobWhite_c15312_405	1B.1	61.7387					Su et al. 2018	2A	Kukri_c411_251	67.406
												Hu et al. 2019	4B	IACX5989	43.166													Cabral et al. 2018	BobWhite_c20015_225	1B.1	61.7387					Su et al. 2018	2A	Kukri_c65988_297	67.406
												Hu et al. 2019	4B	Ra_c59822_1439	43.481													Cabral et al. 2018	BobWhite_c6803_387	1B.1	61.7387					Su et al. 2018	2A	Kukri_c8502_180	67.406
												Hu et al. 2019	4B	GENE-2162_562	43.706													Cabral et al. 2018	BS00022124_51	1B.1	61.7387					Su et al. 2018	2A	Kukri_c85862_95	67.406
												Hu et al. 2019	4B	BS00040159_51	43.956													Cabral et al. 2018	BS00022842_51	1B.1	61.7387					Su et al. 2018	2A	Kukri_c9274_1004	67.406
												Hu et al. 2019	4B	BS00064041_51	45.2													Cabral et al. 2018	CAP12_c2759_111	1B.1	61.7387					Su et al. 2018	2A	Kukri_c98474_481	67.406
												Hu et al. 2019	4B	IACX938	45.815													Cabral et al. 2018	Kukri_c13188_256	1B.1	61.7387					Su et al. 2018	2A	Kukri_rep_c103890_185	67.406
												Hu et al. 2019	4B	tplb0026o15_1634	46.132													Cabral et al. 2018	Kukri_c7905_226	1B.1	61.7387					Su et al. 2018	2A	Kukri_rep_c68291_559	67.406
												Hu et al. 2019	4B	BS00109813_51	46.439													Cabral et al. 2018	RAC875_c94534_75	1B.1	61.7387					Su et al. 2018	2A	Kukri_rep_c74359_1069	67.406
												Hu et al. 2019	4B	Excalibur_c37565_709	46.974													Cabral et al. 2018	Tdurum_contig100413_237	1B.1	61.7387					Su et al. 2018	2A	Ra_c70114_3713	67.406
												Hu et al. 2019	4B	BobWhite_c22580_115	47.311													Cabral et al. 2018	Tdurum_contig42062_651	1B.1	61.7387					Su et al. 2018	2A	RAC875_c10218_944	67.406
												Hu et al. 2019	4B	Excalibur_c12491_220	48.176													Cabral et al. 2018	Tdurum_contig58301_336	1B.1	61.7387					Su et al. 2018	2A	RAC875_c110838_690	67.406
												Hu et al. 2019	4B	Kukri_c27107_760	48.635													Cabral et al. 2018	wsnp_BE495786B_Ta_2_2	1B.1	61.7387					Su et al. 2018	2A	RAC875_c13774_161	67.406
												Hu et al. 2019	4B	BS00046613_51	48.852													Cabral et al. 2018	wsnp_Ex_c17707_26454940	1B.1	61.7387					Su et al. 2018	2A	RAC875_c16967_68	67.406
												Hu et al. 2019	4B	wsnp_CAP12_rep_c4278_1949802	48.908													Cabral et al. 2018	wsnp_Ex_c5679_9976893	1B.1	61.7387					Su et al. 2018	2A	RAC875_c17722_1533	67.406
												Hu et al. 2019	4B	Ex_c7514_3078	49.072													Cabral et al. 2018	wsnp_Ku_c21356_31093507	1B.1	61.7387					Su et al. 2018	2A	RAC875_c21514_77	67.406
												Hu et al. 2019	4B	BS00077411_51	49.187													Cabral et al. 2018	wsnp_Ra_c29782_39115548	1B.1	61.7387					Su et al. 2018	2A	RAC875_c2176_2416	67.406
												Hu et al. 2019	4B	IAAV3896	49.195													Cabral et al. 2018	wPt-1248	1B.1	61.7387					Su et al. 2018	2A	RAC875_c3257_1089	67.406
												Hu et al. 2019	4B	Kukri_rep_c79943_189	49.222													Cabral et al. 2018	Tdurum_contig50473_889	1B.1	61.7387					Su et al. 2018	2A	RAC875_c3257_1155	67.406
												Hu et al. 2019	4B	Tdurum_contig55374_309	49.303													Cabral et al. 2018	BS00022742_51	1B.1	61.7387					Su et al. 2018	2A	RAC875_c3257_1179	67.406
												Hu et al. 2019	4B	BobWhite_c665_296	49.322													Cabral et al. 2018	BS00036362_51	1B.1	61.7387					Su et al. 2018	2A	RAC875_c3257_729	67.406
												Hu et al. 2019	4B	Excalibur_rep_c108293_345	49.566													Cabral et al. 2018	BS00072982_51	1B.1	61.7387					Su et al. 2018	2A	RAC875_c37638_174	67.406
												Hu et al. 2019	4B	RAC875_c23144_1560	49.743													Cabral et al. 2018	BS00078055_51	1B.1	61.7387					Su et al. 2018	2A	RAC875_c43244_404	67.406
												Hu et al. 2019	4B	Tdurum_contig47552_957	50.481													Cabral et al. 2018	CAP12_c424_402	1B.1	61.7387					Su et al. 2018	2A	RAC875_c53568_391	67.406
												Hu et al. 2019	4B	RAC875_rep_c109069_89	51.078													Cabral et al. 2018	CAP7_c12162_251	1B.1	61.7387					Su et al. 2018	2A	RAC875_c54927_1000	67.406
												Hu et al. 2019	4B	BobWhite_c27751_206	53.233													Cabral et al. 2018	Excalibur_rep_c103109_88	1B.1	61.7387					Su et al. 2018	2A	RAC875_c54927_800	67.406
												Hu et al. 2019	4B	wsnp_Ex_c26285_35531324	53.703													Cabral et al. 2018	Ra_c25590_1406	1B.1	61.7387					Su et al. 2018	2A	RAC875_c7201_229	67.406
												Hu et al. 2019	4B	BS00022972_51	56.338													Cabral et al. 2018	Ra_c6701_506	1B.1	61.7387					Su et al. 2018	2A	RAC875_rep_c108548_253	67.406
												Hu et al. 2019	4B	BS00022466_51	61.386													Cabral et al. 2018	RAC875_c6701_291	1B.1	61.7387					Su et al. 2018	2A	RAC875_rep_c114621_200	67.406
												Hu et al. 2019	4B	Ku_c103450_879	65.956													Cabral et al. 2018	wsnp_CAP11_c6264_2895652	1B.1	61.7387					Su et al. 2018	2A	RAC875_rep_c69194_867	67.406
												Hu et al. 2019	4B	RAC875_c107130_384	0													Cabral et al. 2018	wsnp_Ex_c1600_3051075	1B.1	61.7387					Su et al. 2018	2A	RAC875_rep_c85788_126	67.406
												Hu et al. 2019	4B	Excalibur_c12937_64	3.453													Cabral et al. 2018	wsnp_Ex_c53976_57027635	1B.1	61.7387					Su et al. 2018	2A	RFL_Contig3016_1091	67.406
												Hu et al. 2019	4B	RAC875_c51375_430	4.942													Cabral et al. 2018	wsnp_Ku_c33028_42580216	1B.1	61.7387					Su et al. 2018	2A	RFL_Contig3172_444	67.406
												Hu et al. 2019	4B	wsnp_Ex_rep_c67510_66116823	5.157													Cabral et al. 2018	wsnp_Ra_c11232_18256748	1B.1	61.7387					Su et al. 2018	2A	TA003523-0559	67.406
												Hu et al. 2019	4B	BobWhite_c27801_429	5.356													Cabral et al. 2018	wsnp_Ra_c25590_35156699	1B.1	61.7387					Su et al. 2018	2A	TA004133-0887	67.406
												Hu et al. 2019	4B	RAC875_c87897_333	6.292													Cabral et al. 2018	wsnp_Ra_c5088_9081927	1B.1	61.7387					Su et al. 2018	2A	TA004545-0174	67.406
												Hu et al. 2019	4B	wsnp_Ku_c12557_20249122	6.5													Cabral et al. 2018	IACX9510	1B.1	62.2882					Su et al. 2018	2A	TA005542-0450	67.406
												Hu et al. 2019	4B	IAAV5564	6.972													Cabral et al. 2018	BS00010130_51	1B.1	62.2882					Su et al. 2018	2A	TA006409-0318	67.406
												Hu et al. 2019	4B	wsnp_Ex_c4148_7495656	14.51													Cabral et al. 2018	BS00010475	1B.1	62.2882					Su et al. 2018	2A	Tdurum_contig12912_308	67.406
												Hu et al. 2019	4B	Kukri_rep_c101259_159	14.962													Cabral et al. 2018	BS00010779	1B.1	62.2882					Su et al. 2018	2A	tplb0021f10_469	67.406
												Hu et al. 2019	4B	BobWhite_c4256_213	15.501													Cabral et al. 2018	BS00010888	1B.1	62.2882					Su et al. 2018	2A	tplb0050m09_1890	67.406
												Hu et al. 2019	4B	Ra_c19259_1799	15.982													Cabral et al. 2018	BS00012456	1B.1	62.2882					Su et al. 2018	2A	wsnp_Ex_c9345_15516120	67.406
												Hu et al. 2019	4B	BS00034148_51	19.537													Cabral et al. 2018	BobWhite_c16005_289	1B.1	62.2882					Su et al. 2018	2A	wsnp_Ku_c9269_15583444	67.406
												Hu et al. 2019	4B	RAC875_rep_c82932_428	25.388													Cabral et al. 2018	BS00106626_51	1B.1	62.2882					Su et al. 2018	2A	wsnp_Ra_c3057_5773050	67.406
												Hu et al. 2019	4B	wsnp_Ex_c24059_33304285	25.722													Cabral et al. 2018	IACX11291	1B.1	62.2882					Su et al. 2018	2A	wsnp_Ra_rep_c112625_94438013	67.406
												Hu et al. 2019	4B	wsnp_Ku_c7838_13435765	29.423													Cabral et al. 2018	IACX5821	1B.1	62.2882					Su et al. 2018	2A	Excalibur_c28325_140	67.692
												Hu et al. 2019	4D	BS00103682_51	0													Cabral et al. 2018	IACX9097	1B.1	62.2882					Su et al. 2018	2A	Tdurum_contig13837_573	68
												Hu et al. 2019	4D	Ex_c42133_630	0.004													Cabral et al. 2018	IACX9622	1B.1	62.2882					Su et al. 2018	2A	GENE-3975_114	68.475
												Hu et al. 2019	4D	D_GDEEGVY01C7BQU_446	0.596													Cabral et al. 2018	Kukri_c559_193	1B.1	62.2882					Su et al. 2018	2A	BS00098423_51	68.556
												Hu et al. 2019	4D	BS00064002_51	0.606													Cabral et al. 2018	RAC875_c8888_802	1B.1	62.2882					Su et al. 2018	2A	Excalibur_c40617_983	68.749
												Hu et al. 2019	4D	BS00023112_51	0.609													Cabral et al. 2018	RAC875_s110519_303	1B.1	62.2882					Su et al. 2018	2A	wsnp_JD_c15127_14676522	68.749
												Hu et al. 2019	5A	BS00064188_51	0													Cabral et al. 2018	Tdurum_contig87938_342	1B.1	62.2882					Su et al. 2018	2A	Excalibur_rep_c102052_721	69.231
												Hu et al. 2019	5A	Ex_c95453_1499	2.748													Cabral et al. 2018	wsnp_BG606586B_Ta_2_13	1B.1	62.2882					Su et al. 2018	2A	Ra_c26702_797	70.071
												Hu et al. 2019	5A	wsnp_BE399966A_Ta_2_3	4.791													Cabral et al. 2018	wsnp_JD_c11014_11565501	1B.1	62.2882					Su et al. 2018	2A	BS00096882_51	70.379
												Hu et al. 2019	5A	BS00022353_51	5.979													Cabral et al. 2018	wsnp_Ex_c23992_33235984	1B.1	63.3812					Su et al. 2018	2A	BS00083497_51	70.379
												Hu et al. 2019	5A	BS00079189_51	15.622													Cabral et al. 2018	BS00012250	1B.1	63.3812					Su et al. 2018	2A	CAP12_c2436_132	70.994
												Hu et al. 2019	5A	Tdurum_contig42309_627	17.893													Cabral et al. 2018	BS00010399_51	1B.1	63.3812					Su et al. 2018	2A	BS00048108_51	71.412
												Hu et al. 2019	5A	RFL_Contig3674_847	18.431													Cabral et al. 2018	BS00012250_51	1B.1	63.3812					Su et al. 2018	2A	BS00108517_51	71.653
												Hu et al. 2019	5A	BS00099701_51	18.732													Cabral et al. 2018	Ex_c102909_778	1B.1	63.3812					Su et al. 2018	2A	BobWhite_c34598_70	71.653
												Hu et al. 2019	5A	wsnp_CAP7_c2282_1107112	18.738													Cabral et al. 2018	Excalibur_c23992_436	1B.1	63.3812					Su et al. 2018	2A	BobWhite_rep_c64766_352	71.653
												Hu et al. 2019	5A	BS00111119_51	19.38													Cabral et al. 2018	Excalibur_c48379_116	1B.1	63.3812					Su et al. 2018	2A	BS00086329_51	71.653
												Hu et al. 2019	5A	BS00077879_51	22.125													Cabral et al. 2018	Excalibur_c48379_413	1B.1	63.3812					Su et al. 2018	2A	Excalibur_c41125_360	71.653
												Hu et al. 2019	5A	BS00047242_51	23.598													Cabral et al. 2018	Excalibur_c48379_461	1B.1	63.3812					Su et al. 2018	2A	Excalibur_c47219_186	71.653
												Hu et al. 2019	5A	Excalibur_rep_c95828_165	24.26													Cabral et al. 2018	IACX11029	1B.1	63.3812					Su et al. 2018	2A	IAAV6408	71.653
												Hu et al. 2019	5A	RAC875_c61887_194	24.469													Cabral et al. 2018	Kukri_c27693_260	1B.1	63.3812					Su et al. 2018	2A	Ku_c13700_1196	71.653
												Hu et al. 2019	5A	BS00021708_51	24.902													Cabral et al. 2018	Kukri_c27693_551	1B.1	63.3812					Su et al. 2018	2A	Ku_c69608_894	71.653
												Hu et al. 2019	5A	wsnp_CAP11_c951_572693	26.328													Cabral et al. 2018	Kukri_rep_c104054_174	1B.1	63.3812					Su et al. 2018	2A	Ra_c12874_2478	71.653
												Hu et al. 2019	5A	Tdurum_contig50875_569	26.55													Cabral et al. 2018	Ra_c62804_1641	1B.1	63.3812					Su et al. 2018	2A	RAC875_c64377_350	71.653
												Hu et al. 2019	5A	wsnp_JD_rep_c61843_39601402	31.731													Cabral et al. 2018	RAC875_c23743_552	1B.1	63.3812					Su et al. 2018	2A	RAC875_rep_c119619_54	71.653
												Hu et al. 2019	5A	wsnp_Ra_rep_c69221_66574148	32.603													Cabral et al. 2018	wsnp_Ex_c7447_12751589	1B.1	63.9277					Su et al. 2018	2A	TA001297-0826	71.653
												Hu et al. 2019	5A	Ra_c69221_1167	32.674													Cabral et al. 2018	BS00001414	1B.1	63.9277					Su et al. 2018	2A	wsnp_BG605368A_Ta_2_4	71.653
												Hu et al. 2019	5A	BS00042511_51	35.475													Cabral et al. 2018	CAP12_c4007_435	1B.1	63.9277					Su et al. 2018	2A	wsnp_Ex_c23768_33006588	71.653
												Hu et al. 2019	5A	wsnp_Ex_c62351_62025689	35.943													Cabral et al. 2018	CAP8_c4452_431	1B.1	63.9277					Su et al. 2018	2A	wsnp_Ex_c2426_4542393	71.653
												Hu et al. 2019	5A	BS00022906_51	35.984													Cabral et al. 2018	Excalibur_c30955_479	1B.1	63.9277					Su et al. 2018	2A	wsnp_Ex_rep_c67848_66550974	71.653
												Hu et al. 2019	5A	Excalibur_c15838_535	36.003													Cabral et al. 2018	GENE-0524_302	1B.1	63.9277					Su et al. 2018	2A	wsnp_Ex_rep_c71983_70544041	71.653
												Hu et al. 2019	5A	BS00046772_51	36.011													Cabral et al. 2018	GENE-1476_579	1B.1	63.9277					Su et al. 2018	2A	wsnp_Ku_c52392_57380726	71.653
												Hu et al. 2019	5A	BS00097623_51	36.258													Cabral et al. 2018	IACX3595	1B.1	63.9277					Su et al. 2018	2A	BS00107804_51	71.789
												Hu et al. 2019	5A	wsnp_Ra_c11420_18529863	36.263													Cabral et al. 2018	Kukri_c73734_175	1B.1	63.9277					Su et al. 2018	2A	Kukri_c9118_1891	71.862
												Hu et al. 2019	5A	Kukri_rep_c107435_940	36.456													Cabral et al. 2018	Kukri_c9593_381	1B.1	63.9277					Su et al. 2018	2A	BobWhite_c9505_515	71.862
												Hu et al. 2019	5A	BS00045473_51	36.749													Cabral et al. 2018	RAC875_c32077_284	1B.1	63.9277					Su et al. 2018	2A	RAC875_c10218_91	72.003
												Hu et al. 2019	5A	wsnp_Ex_c4501_8092034	37.329													Cabral et al. 2018	RAC875_c46151_243	1B.1	63.9277					Su et al. 2018	2A	Kukri_c2951_2574	72.049
[truncated: 11,144 more rows]
[truncated: 18 more columns]

## Sheet: Table S4
Table S4 Detailed statistics of QTL of different traits contained in MQTL
[truncated: 148 more rows]

[truncated: 4 more sheets: Table S5, Table S6, Table S7, Supplementary Reference]
